# Supplementary material
Source: PubMed Central journal article supplement (PMC8687357)
Supplement: SYB2-10-219-s001.pdf [file SYB2-10-219-s001.pdf]

**Table S6:** Pairwise interactions of the reconstructed core network (as represented in Figure 2)

| miRNA           | Target Gene | TF    | Target Gene | miRNA        | TF     |
|-----------------|-------------|-------|-------------|--------------|--------|
| hsa-let-7a-5p   | FNIP1       | CEBPA | CAMTA1      | hsa-miR-1    | CEBPA  |
| hsa-let-7b-5p   | UTRN        | CEBPA | ERRFI1      | hsa-miR-1    | YY1    |
| hsa-let-7d-5p   | STK40       | CEBPA | MTOR        | hsa-miR-106a | E2F1   |
| hsa-let-7e-5p   | SMAP2       | CEBPA | PIK3CD      | hsa-miR-106a | EGR1   |
| hsa-miR-1       | KCNJ2       | CEBPA | PPARG       | hsa-miR-106b | E2F1   |
| hsa-miR-1       | MTMR12      | CEBPA | PRDM16      | hsa-miR-106b | E2F1   |
| hsa-miR-1       | MXD4        | CEBPA | RERE        | hsa-miR-10a  | EGR1   |
| hsa-miR-1       | SLC44A1     | CEBPA | VAMP3       | hsa-miR-130b | EGR1   |
| hsa-miR-100-5p  | MTOR        | CTCF  | APP         | hsa-miR-132  | EGR1   |
| hsa-miR-101-3p  | CAPN2       | CTCF  | CAMTA1      | hsa-let-7    | MYC    |
| hsa-miR-101-3p  | NEK7        | CTCF  | ERRFI1      | hsa-let-7    | ZEB1   |
| hsa-miR-101-3p  | STAMBP      | CTCF  | MTOR        | hsa-let-7a   | E2F1   |
| hsa-miR-103a-3p | ASH1L       | CTCF  | NECAP2      | hsa-let-7a   | FLI1   |
| hsa-miR-103a-3p | MTMR4       | CTCF  | PIK3CD      | hsa-let-7a   | MYC    |
| hsa-miR-103a-3p | PRKAB2      | CTCF  | PRDM16      | hsa-let-7a-1 | MYC    |
| hsa-miR-103a-3p | SIPA1L2     | CTCF  | RERE        | hsa-let-7a-2 | CEBPA  |
| hsa-miR-103a-3p | TPD52       | E2F1  | CCNE1       | hsa-let-7a-3 | NFKB1  |
| hsa-miR-106a-5p | E2F1        | E2F1  | E2F1        | hsa-let-7b   | MYC    |
| hsa-miR-106a-5p | RB1         | E2F1  | MYB         | hsa-let-7b   | NFKB1  |
| hsa-miR-106b-5p | E2F1        | E2F1  | MYC         | hsa-let-7c   | MYC    |
| hsa-miR-106b-5p | JAK1        | EGR1  | ABL1        | hsa-let-7d   | MYC    |
| hsa-miR-106b-5p | KATNAL1     | EGR1  | CAMSAP1     | hsa-let-7d   | MYC    |
| hsa-miR-106b-5p | RB1         | EGR1  | CBFB        | hsa-let-7e   | EGR1   |
| hsa-miR-106b-5p | RORA        | EGR1  | CBX2        | hsa-let-7e   | MYC    |
| hsa-miR-107     | CCNE1       | EGR1  | CKAP4       | hsa-let-7f   | MYC    |
| hsa-miR-107     | CDK6        | EGR1  | CLIC4       | hsa-let-7f-1 | MYC    |
| hsa-miR-10a-5p  | LCA5        | EGR1  | FAIM        | hsa-let-7g   | MYC    |
| hsa-miR-122-5p  | ANKRD13C    | EGR1  | KBTBD2      | hsa-let-7g   | POU2F1 |

|                 |         |
|-----------------|---------|
| hsa-miR-122-5p  | CLIC4   |
| hsa-miR-124-3p  | CBX2    |
| hsa-miR-124-3p  | CDH2    |
| hsa-miR-124-3p  | COL4A1  |
| hsa-miR-124-3p  | FAM129B |
| hsa-miR-124-3p  | FCHO2   |
| hsa-miR-124-3p  | KANK1   |
| hsa-miR-124-3p  | LRRC1   |
| hsa-miR-124-3p  | NECAP2  |
| hsa-miR-124-3p  | SERTAD2 |
| hsa-miR-124-3p  | SP1     |
| hsa-miR-124-3p  | STT3A   |
| hsa-miR-124-3p  | TARBP1  |
| hsa-miR-124-3p  | VAMP3   |
| hsa-miR-125a-5p | OSBPL9  |
| hsa-miR-125a-5p | TP53    |
| hsa-miR-125b-5p | ETS1    |
| hsa-miR-125b-5p | SLC35A4 |
| hsa-miR-127-3p  | BCL6    |
| hsa-miR-128-3p  | ALDH4A1 |
| hsa-miR-128-3p  | UBE2W   |
| hsa-miR-129-5p  | CAMTA1  |
| hsa-miR-129-5p  | ETV6    |
| hsa-miR-130a-3p | PPARG   |
| hsa-miR-130a-3p | RUNX3   |
| hsa-miR-130b-3p | CBFB    |
| hsa-miR-130b-3p | GRB10   |
| hsa-miR-130b-3p | NAA30   |
| hsa-miR-130b-3p | NCKAP5  |
| hsa-miR-130b-3p | PPARG   |
| hsa-miR-130b-3p | PPP6R3  |

|      |         |
|------|---------|
| EGR1 | KLF10   |
| EGR1 | KLF11   |
| EGR1 | MCFD2   |
| EGR1 | MTDH    |
| EGR1 | ONECUT2 |
| EGR1 | PCMTD2  |
| EGR1 | PRUNE2  |
| EGR1 | RORA    |
| EGR1 | SEH1L   |
| EGR1 | SP3     |
| EGR1 | TAF4    |
| EGR1 | TRIO    |
| EGR1 | UBE2W   |
| EGR1 | UBP1    |
| ESR2 | ALPL    |
| ESR2 | CAMTA1  |
| ESR2 | LDLRAP1 |
| ESR2 | PRDM16  |
| ESR2 | RERE    |
| ESR2 | RUNX3   |
| ESR2 | VAMP3   |
| ETS1 | ALDH4A1 |
| ETS1 | CAMTA1  |
| ETS1 | CDC42   |
| Ets1 | CTGF    |
| ETS1 | CTGF    |
| ETS1 | MFN2    |
| ETS1 | MTOR    |
| ETS1 | NECAP2  |
| ETS1 | PIK3CD  |
| ETS1 | RERE    |

|                 |       |
|-----------------|-------|
| hsa-let-7i      | E2F1  |
| hsa-let-7i      | MYC   |
| hsa-miR-1       | MYF5  |
| hsa-miR-101-3p  | FOS   |
| hsa-miR-106a    | MYC   |
| hsa-miR-106a    | MYC   |
| hsa-miR-106a    | SP1   |
| hsa-miR-106a-5p | E2F1  |
| hsa-miR-106b    | MYC   |
| hsa-miR-106b-5p | E2F1  |
| hsa-miR-107     | TP53  |
| hsa-miR-107     | TP53  |
| hsa-miR-10b     | NFKB1 |
| hsa-miR-122     | HNF1A |
| hsa-miR-124-3   | EGR1  |
| hsa-miR-124-3p  | RELA  |
| hsa-miR-124-3p  | SP1   |
| hsa-miR-125a    | EGR1  |
| hsa-miR-125a-5p | TP53  |
| hsa-miR-125b    | CDX2  |
| hsa-miR-125b    | NFKB1 |
| hsa-miR-125b    | STAT3 |
| hsa-miR-125b    | TP53  |
| hsa-miR-125b-5p | ETS1  |
| hsa-miR-125b-5p | IRF4  |
| hsa-miR-132     | CREB1 |
| hsa-miR-132     | SP1   |
| hsa-miR-133a    | MYF5  |

|                 |         |
|-----------------|---------|
| hsa-miR-130b-3p | PRUNE2  |
| hsa-miR-130b-3p | RNF145  |
| hsa-miR-130b-3p | RUNX3   |
| hsa-miR-130b-3p | SLC44A1 |
| hsa-miR-133a-3p | EGFR    |
| hsa-miR-133b    | EGFR    |
| hsa-miR-133b    | FAIM    |
| hsa-miR-133b    | PTPRK   |
| hsa-miR-135a-5p | NR3C2   |
| hsa-miR-137     | CDK6    |
| hsa-miR-137     | MITF    |
| hsa-miR-138-5p  | RARA    |
| hsa-miR-140-5p  | VEGFA   |
| hsa-miR-141-3p  | KLF11   |
| hsa-miR-141-3p  | YWHAG   |
| hsa-miR-145-5p  | SERINC5 |
| hsa-miR-145-5p  | TPM3    |
| hsa-miR-148b-3p | ABCB7   |
| hsa-miR-148b-3p | USP48   |
| hsa-miR-150-5p  | MYB     |
| hsa-miR-155-5p  | ETS1    |
| hsa-miR-155-5p  | KBTBD2  |
| hsa-miR-155-5p  | PKN2    |
| hsa-miR-155-5p  | TLE4    |
| hsa-miR-15a-5p  | CCNE1   |
| hsa-miR-15a-5p  | VEGFA   |
| hsa-miR-15b-5p  | CCNE1   |
| hsa-miR-15b-5p  | VEGFA   |
| hsa-miR-16-5p   | ASH1L   |
| hsa-miR-16-5p   | BTG2    |
| hsa-miR-16-5p   | CAMSAP1 |

|       |          |
|-------|----------|
| ETS1  | TARDBP   |
| ETS1  | USP48    |
| ETS1  | VAMP3    |
| FLI1  | CTGF     |
| FOS   | CAMTA1   |
| FOS   | DCAF7    |
| FOS   | GATAD2A  |
| FOS   | GATAD2B  |
| FOS   | GRK6     |
| Fos   | HBEGF    |
| FOS   | HBP1     |
| FOS   | KAT6B    |
| FOS   | MTMR12   |
| FOS   | MTMR4    |
| FOS   | MTOR     |
| FOS   | MXD4     |
| FOS   | NLK      |
| FOS   | NUMB     |
| FOS   | PPP6R3   |
| FOS   | SERTAD2  |
| FOS   | SP1      |
| FOS   | STK40    |
| FOS   | STT3A    |
| FOS   | SUV420H2 |
| FOS   | ZBTB5    |
| GATA3 | ALDH4A1  |
| GATA3 | CAMTA1   |
| GATA3 | CDC42    |
| GATA3 | ERRFI1   |
| GATA3 | PRDM16   |
| GATA3 | RERE     |

|                |       |
|----------------|-------|
| hsa-miR-135b   | FOXO1 |
| hsa-miR-135b   | STAT3 |
| hsa-miR-137    | MITF  |
| hsa-miR-137    | SOX2  |
| hsa-miR-139-5p | FOS   |
| hsa-miR-141    | MYC   |
| hsa-miR-141    | ZEB1  |
| hsa-miR-141    | ZEB1  |
| hsa-miR-141    | ZEB2  |
| hsa-miR-141-3p | ZEB1  |
| hsa-miR-141-3p | ZEB2  |
| hsa-miR-142    | EGR1  |
| hsa-miR-143    | CEBPB |
| hsa-miR-143    | SMAD3 |
| hsa-miR-143    | TP53  |
| hsa-miR-144    | GATA4 |
| hsa-miR-145    | SMAD3 |
| hsa-miR-145    | TP53  |
| hsa-miR-145    | TP53  |
| hsa-miR-146a   | ETS1  |
| hsa-miR-146a   | NFKB1 |
| hsa-miR-146a   | NFKB1 |
| hsa-miR-146a   | SPI1  |
| hsa-miR-146a   | SPI1  |
| hsa-miR-146b   | EGR1  |
| hsa-miR-148a   | EGR1  |
| hsa-miR-148a   | MYB   |
| hsa-miR-149    | EGR1  |
| hsa-miR-150-5p | MYB   |
| hsa-miR-155    | IRF1  |
| hsa-miR-155    | MYB   |

|                 |          |
|-----------------|----------|
| hsa-miR-16-5p   | CCNE1    |
| hsa-miR-16-5p   | GATAD2A  |
| hsa-miR-16-5p   | OSBPL3   |
| hsa-miR-16-5p   | PDE3B    |
| hsa-miR-16-5p   | SEH1L    |
| hsa-miR-16-5p   | SIPA1L2  |
| hsa-miR-16-5p   | SLC11A2  |
| hsa-miR-16-5p   | TLE4     |
| hsa-miR-16-5p   | VEGFA    |
| hsa-miR-16-5p   | ZNRF3    |
| hsa-miR-17-5p   | ADARB1   |
| hsa-miR-17-5p   | CCND1    |
| hsa-miR-17-5p   | DPYSL2   |
| hsa-miR-17-5p   | E2F1     |
| hsa-miR-17-5p   | HBP1     |
| hsa-miR-17-5p   | JAK1     |
| hsa-miR-17-5p   | RB1      |
| hsa-miR-181a-5p | ANKRD13C |
| hsa-miR-181a-5p | GPRIN3   |
| hsa-miR-181a-5p | MTMR12   |
| hsa-miR-181a-5p | NOTCH2   |
| hsa-miR-181a-5p | PLCL2    |
| hsa-miR-181a-5p | RLF      |
| hsa-miR-181c-5p | NOTCH2   |
| hsa-miR-182-5p  | MITF     |
| hsa-miR-185-5p  | CDC42    |
| hsa-miR-185-5p  | SMG7     |
| hsa-miR-186-5p  | FNIP1    |
| hsa-miR-186-5p  | KIAA1462 |
| hsa-miR-186-5p  | RBFOX2   |
| hsa-miR-186-5p  | TARDBP   |

|       |         |
|-------|---------|
| GATA3 | USP48   |
| HIF1A | ARID1B  |
| HIF1A | ATXN7L1 |
| HIF1A | CCNG2   |
| HIF1A | DMXL1   |
| HIF1A | DNAJB9  |
| HIF1A | DPYSL2  |
| HIF1A | EGFR    |
| HIF1A | ERRF1   |
| HIF1A | FAM129B |
| HIF1A | FNIP1   |
| HIF1A | FZD3    |
| HIF1A | GPRIN3  |
| HIF1A | GRB10   |
| HIF1A | KCNJ2   |
| HIF1A | NAA30   |
| HIF1A | NCKAP5  |
| HIF1A | NUMB    |
| HIF1A | PAIP2   |
| HIF1A | PCBP1   |
| HIF1A | PCMTD1  |
| HIF1A | PDE4D   |
| HIF1A | PFKFB3  |
| HIF1A | PLOD2   |
| HIF1A | PNISR   |
| HIF1A | PPID    |
| HIF1A | PPP6R3  |
| HIF1A | PRDM1   |
| HIF1A | PRKAB2  |
| HIF1A | PXDN    |
| HIF1A | RAD23B  |

|                |       |
|----------------|-------|
| hsa-miR-155    | NFKB1 |
| hsa-miR-155    | NFKB1 |
| hsa-miR-155    | SPI1  |
| hsa-miR-155    | TP53  |
| hsa-miR-155-5p | ETS1  |
| hsa-miR-15a    | E2F1  |
| hsa-miR-15a    | E2F1  |
| hsa-miR-15a    | MYC   |
| hsa-miR-15b    | E2F1  |
| hsa-miR-15b    | E2F1  |
| hsa-miR-16     | E2F1  |
| hsa-miR-16     | NFKB1 |
| hsa-miR-16-1   | E2F1  |
| hsa-miR-16-1   | MYC   |
| hsa-miR-16-2   | E2F1  |
| hsa-miR-17     | E2F1  |
| hsa-miR-17     | E2F1  |
| hsa-miR-17     | MYC   |
| hsa-miR-17     | MYC   |
| hsa-miR-17     | MYC   |
| hsa-miR-17     | NFKB1 |
| hsa-miR-17     | SPI1  |
| hsa-miR-17-5p  | E2F1  |
| hsa-miR-181a-2 | TCF4  |
| hsa-miR-181b-1 | STAT3 |
| hsa-miR-181b-2 | TCF4  |
| hsa-miR-182-5p | MITF  |
| hsa-miR-183    | EGR1  |
| hsa-miR-185    | EGR1  |
| hsa-miR-18a    | E2F1  |

|                 |         |
|-----------------|---------|
| hsa-miR-18a-5p  | CTGF    |
| hsa-miR-18a-5p  | NR3C1   |
| hsa-miR-18a-5p  | PDE4D   |
| hsa-miR-192-5p  | RB1     |
| hsa-miR-193b-3p | DCAF7   |
| hsa-miR-193b-3p | ZBTB5   |
| hsa-miR-194-5p  | HBEGF   |
| hsa-miR-195-5p  | CCNE1   |
| hsa-miR-195-5p  | VEGFA   |
| hsa-miR-196a-5p | HOXA7   |
| hsa-miR-19a-3p  | GRK6    |
| hsa-miR-19b-3p  | ATF2    |
| hsa-miR-19b-3p  | ATXN7L1 |
| hsa-miR-19b-3p  | CAMSAP1 |
| hsa-miR-19b-3p  | HBP1    |
| hsa-miR-19b-3p  | KLF10   |
| hsa-miR-19b-3p  | NCKAP5  |
| hsa-miR-19b-3p  | NR3C2   |
| hsa-miR-19b-3p  | PRUNE2  |
| hsa-miR-19b-3p  | RNF145  |
| hsa-miR-19b-3p  | TAF4    |
| hsa-miR-19b-3p  | TRIM33  |
| hsa-miR-19b-3p  | VAMP3   |
| hsa-miR-200a-3p | KLF11   |
| hsa-miR-200b-3p | FN1     |
| hsa-miR-200b-3p | VEGFA   |
| hsa-miR-200c-3p | ERRFI1  |
| hsa-miR-200c-3p | FN1     |
| hsa-miR-200c-3p | VEGFA   |
| hsa-miR-204-5p  | ALPL    |
| hsa-miR-206     | UTRN    |

|       |          |
|-------|----------|
| HIF1A | RBFOX2   |
| HIF1A | RERE     |
| HIF1A | RLF      |
| HIF1A | RNF145   |
| HIF1A | RRM2     |
| HIF1A | SLC11A2  |
| HIF1A | SLC25A32 |
| HIF1A | SLC35A4  |
| HIF1A | SMAP2    |
| HIF1A | SOCS6    |
| HIF1A | STAMBP   |
| HIF1A | TLE4     |
| HIF1A | TPD52    |
| HIF1A | UGP2     |
| HIF1A | UTRN     |
| HIF1A | VEGFA    |
| HIF1A | VEGFA    |
| HIF1A | YWHAG    |
| HIF1A | ZBTB10   |
| HIF1A | ZNF148   |
| MITF  | CAMTA1   |
| MITF  | ERRFI1   |
| MITF  | MTOR     |
| MITF  | PIK3CD   |
| MITF  | PRDM16   |
| MITF  | RERE     |
| NFKB1 | TP53     |
| RUNX1 | CDK6     |
| RUNX1 | COL4A2   |
| RUNX1 | ETV6     |
| RUNX1 | FCHO2    |

|                 |       |
|-----------------|-------|
| hsa-miR-18a     | MYC   |
| hsa-miR-18a     | SPI1  |
| hsa-miR-18a-5p  | HIF1A |
| hsa-miR-18b     | E2F1  |
| hsa-miR-191     | EGR1  |
| hsa-miR-192     | HNF1A |
| hsa-miR-192     | TP53  |
| hsa-miR-192     | TP53  |
| hsa-miR-192     | TP53  |
| hsa-miR-193a    | RXRA  |
| hsa-miR-194     | HNF1A |
| hsa-miR-194     | HNF1A |
| hsa-miR-194     | HNF1A |
| hsa-miR-194     | TP53  |
| hsa-miR-195     | E2F1  |
| hsa-miR-195     | MYC   |
| hsa-miR-199a-2  | NFKB1 |
| hsa-miR-199b-5p | HIF1A |
| hsa-miR-19a     | E2F1  |
| hsa-miR-19a     | MYC   |
| hsa-miR-19a     | MYC   |
| hsa-miR-19a     | SPI1  |
| hsa-miR-19b     | E2F1  |
| hsa-miR-19b     | MYC   |
| hsa-miR-19b     | MYC   |
| hsa-miR-19b-1   | SPI1  |
| hsa-miR-19b-2   | E2F1  |
| hsa-miR-200a    | GATA3 |
| hsa-miR-200a    | SMAD3 |
| hsa-miR-200a    | TP53  |
| hsa-miR-200a    | ZEB1  |

|                 |         |
|-----------------|---------|
| hsa-miR-208a-3p | ETS1    |
| hsa-miR-20a-5p  | E2F1    |
| hsa-miR-20a-5p  | PPP6R3  |
| hsa-miR-20a-5p  | RB1     |
| hsa-miR-215-5p  | RB1     |
| hsa-miR-21-5p   | PAN3    |
| hsa-miR-21-5p   | PCBP1   |
| hsa-miR-218-5p  | RARA    |
| hsa-miR-218-5p  | TPD52   |
| hsa-miR-221-3p  | KIT     |
| hsa-miR-221-3p  | POGZ    |
| hsa-miR-222-3p  | KIT     |
| hsa-miR-222-3p  | PAIP2   |
| hsa-miR-222-3p  | YWHAG   |
| hsa-miR-223-3p  | LMO2    |
| hsa-miR-223-3p  | SP3     |
| hsa-miR-23b-3p  | MCFD2   |
| hsa-miR-23b-3p  | PCMTD2  |
| hsa-miR-23b-3p  | SOCS6   |
| hsa-miR-24-3p   | PTPRF   |
| hsa-miR-24-3p   | TMEM209 |
| hsa-miR-26a-5p  | MTDH    |
| hsa-miR-26b-5p  | PFKFB3  |
| hsa-miR-26b-5p  | PLOD2   |
| hsa-miR-26b-5p  | VANGL2  |
| hsa-miR-27a-3p  | EGFR    |
| hsa-miR-27b-3p  | PPARG   |
| hsa-miR-29a-3p  | COL4A1  |
| hsa-miR-29a-3p  | COL4A2  |
| hsa-miR-29a-3p  | HBP1    |
| hsa-miR-29a-3p  | PXDN    |

|       |          |
|-------|----------|
| RUNX1 | KATNAL1  |
| RUNX1 | KIAA1462 |
| RUNX1 | LMO2     |
| RUNX1 | LRRC1    |
| RUNX1 | MAP3K8   |
| RUNX1 | MED12L   |
| RUNX1 | NEK7     |
| RUNX1 | OSBPL3   |
| RUNX1 | PAN3     |
| RUNX1 | PDE3B    |
| RUNX1 | PLCL2    |
| RUNX1 | PPM1A    |
| RUNX1 | PTPRK    |
| RUNX1 | RGS16    |
| RUNX1 | SERINC5  |
| RUNX1 | SIPA1L2  |
| RUNX1 | SLC44A1  |
| RUNX1 | TBPL1    |
| RUNX1 | TMEM209  |
| RUNX1 | TNRC18   |
| RXRA  | BTG2     |
| RXRA  | ETS1     |
| RXRA  | HOXA7    |
| RXRA  | RARA     |
| SMAD3 | CTGF     |
| SOX10 | MITF     |
| SOX2  | ABCB7    |
| SOX2  | APP      |
| SOX2  | CCND1    |
| SOX2  | CDH2     |
| SOX2  | COL15A1  |

|                 |       |
|-----------------|-------|
| hsa-miR-200a    | ZEB2  |
| hsa-miR-200a-3p | ZEB1  |
| hsa-miR-200a-3p | ZEB2  |
| hsa-miR-200b    | EGR1  |
| hsa-miR-200b    | GATA3 |
| hsa-miR-200b    | SMAD3 |
| hsa-miR-200b    | TP53  |
| hsa-miR-200b    | ZEB1  |
| hsa-miR-200b    | ZEB2  |
| hsa-miR-200b-3p | ZEB1  |
| hsa-miR-200b-3p | ZEB2  |
| hsa-miR-200c    | GATA3 |
| hsa-miR-200c    | TP53  |
| hsa-miR-200c    | ZEB1  |
| hsa-miR-200c    | ZEB1  |
| hsa-miR-200c    | ZEB2  |
| hsa-miR-200c-3p | ZEB1  |
| hsa-miR-200c-3p | ZEB2  |
| hsa-miR-205-5p  | ZEB1  |
| hsa-miR-206     | MYF5  |
| hsa-miR-208a-3p | ETS1  |
| hsa-miR-20a     | E2F1  |
| hsa-miR-20a     | MYC   |
| hsa-miR-20a     | MYC   |
| hsa-miR-20a     | SPI1  |
| hsa-miR-20a-5p  | E2F1  |
| hsa-miR-20a-5p  | HIF1A |
| hsa-miR-20a-5p  | STAT3 |
| hsa-miR-20b     | E2F1  |
| hsa-miR-20b     | MYC   |
| hsa-miR-20b-5p  | HIF1A |

|                 |          |
|-----------------|----------|
| hsa-miR-29a-3p  | SUV420H2 |
| hsa-miR-29b-3p  | COL4A1   |
| hsa-miR-29b-3p  | VEGFA    |
| hsa-miR-29c-3p  | ANKRD13C |
| hsa-miR-29c-3p  | COL15A1  |
| hsa-miR-29c-3p  | COL4A1   |
| hsa-miR-29c-3p  | COL4A2   |
| hsa-miR-29c-3p  | SUV420H2 |
| hsa-miR-29c-3p  | VEGFA    |
| hsa-miR-29c-3p  | ZBTB10   |
| hsa-miR-301a-3p | RUNX3    |
| hsa-miR-30a-5p  | ABL1     |
| hsa-miR-30a-5p  | MTDH     |
| hsa-miR-30a-5p  | PIK3CD   |
| hsa-miR-30a-5p  | PPID     |
| hsa-miR-30a-5p  | PRDM1    |
| hsa-miR-30a-5p  | PTGFRN   |
| hsa-miR-30a-5p  | RAD23B   |
| hsa-miR-30b-5p  | DDAH1    |
| hsa-miR-30b-5p  | KLF10    |
| hsa-miR-30c-5p  | CAPZA1   |
| hsa-miR-30c-5p  | DPYSL2   |
| hsa-miR-30c-5p  | MTDH     |
| hsa-miR-30c-5p  | NEDD4    |
| hsa-miR-31-5p   | NUMB     |
| hsa-miR-32-5p   | DNAJB9   |
| hsa-miR-32-5p   | SLC25A32 |
| hsa-miR-32-5p   | TRIO     |
| hsa-miR-32-5p   | UGP2     |
| hsa-miR-330-3p  | E2F1     |
| hsa-miR-340-5p  | KAT6B    |

|       |          |
|-------|----------|
| SOX2  | COL4A1   |
| SOX2  | GADD45A  |
| SOX2  | KANK1    |
| SOX2  | KIT      |
| SOX2  | LCA5     |
| SOX2  | NEDD4    |
| SOX2  | NR3C2    |
| SOX2  | PDE4D    |
| SOX2  | PDK1     |
| SOX2  | ZNRF3    |
| SP1   | ATF2     |
| SP1   | EGFR     |
| SP1   | FN1      |
| SP1   | HBEGF    |
| SP1   | RB1      |
| SP1   | SP3      |
| SP1   | VEGFA    |
| SPI1  | BCL6     |
| SPI1  | MYB      |
| SPI1  | NR3C1    |
| STAT3 | IRF1     |
| TP53  | ADARB1   |
| TP53  | ANKRD13C |
| TP53  | ASH1L    |
| TP53  | BTG2     |
| TP53  | CAPN2    |
| TP53  | CAPZA1   |
| TP53  | DDAH1    |
| TP53  | DDAH1    |
| TP53  | GADD45A  |
| TP53  | GADD45A  |

|               |       |
|---------------|-------|
| hsa-miR-21    | NFKB1 |
| hsa-miR-21    | NFKB1 |
| hsa-miR-21    | RELA  |
| hsa-miR-21    | REST  |
| hsa-miR-21    | STAT3 |
| hsa-miR-21    | TCF4  |
| hsa-miR-210   | HIF1A |
| hsa-miR-210   | HIF1A |
| hsa-miR-210   | HIF1A |
| hsa-miR-211   | MITF  |
| hsa-miR-212   | CREB1 |
| hsa-miR-212   | CREB1 |
| hsa-miR-212   | EGR1  |
| hsa-miR-214   | NFKB1 |
| hsa-miR-215   | TP53  |
| hsa-miR-21-5p | STAT3 |
| hsa-miR-216a  | AR    |
| hsa-miR-219-2 | EGR1  |
| hsa-miR-22    | MYC   |
| hsa-miR-221   | FOSL1 |
| hsa-miR-221   | FOSL1 |
| hsa-miR-221   | MYC   |
| hsa-miR-222   | ETS1  |
| hsa-miR-222   | FOSL1 |
| hsa-miR-223   | CEBPA |
| hsa-miR-223   | E2F1  |
| hsa-miR-224   | NFKB1 |
| hsa-miR-23a   | EGR1  |

|                 |         |
|-----------------|---------|
| hsa-miR-340-5p  | NEK7    |
| hsa-miR-342-3p  | RRM2    |
| hsa-miR-34a-5p  | CAMTA1  |
| hsa-miR-34a-5p  | MDM4    |
| hsa-miR-34a-5p  | POGZ    |
| hsa-miR-34a-5p  | TNRC18  |
| hsa-miR-34a-5p  | UBP1    |
| hsa-miR-34c-5p  | MYC     |
| hsa-miR-361-5p  | VEGFA   |
| hsa-miR-370-3p  | MAP3K8  |
| hsa-miR-374a-5p | GADD45A |
| hsa-miR-375     | PDK1    |
| hsa-miR-377-3p  | PPM1A   |
| hsa-miR-383-5p  | IRF1    |
| hsa-miR-383-5p  | VEGFA   |
| hsa-miR-424-5p  | CCNE1   |
| hsa-miR-424-5p  | PNISR   |
| hsa-miR-424-5p  | TBPL1   |
| hsa-miR-429     | ERRFI1  |
| hsa-miR-429     | RERE    |
| hsa-miR-485-5p  | TP53    |
| hsa-miR-520c-3p | APP     |
| hsa-miR-532-5p  | RUNX3   |
| hsa-miR-590-3p  | GATAD2B |
| hsa-miR-7-5p    | CKAP4   |
| hsa-miR-92a-3p  | ARID1B  |
| hsa-miR-92a-3p  | DMXL1   |
| hsa-miR-92a-3p  | FNIP1   |
| hsa-miR-92a-3p  | PCMTD1  |
| hsa-miR-92b-3p  | ARID1B  |
| hsa-miR-92b-3p  | NLK     |

|      |        |
|------|--------|
| TP53 | JAK1   |
| TP53 | LYST   |
| TP53 | MDM4   |
| TP53 | NOTCH2 |
| TP53 | NOTCH2 |
| TP53 | OSBPL9 |
| TP53 | PKN2   |
| TP53 | PKN2   |
| TP53 | POGZ   |
| TP53 | PTGFRN |
| TP53 | PTGFRN |
| TP53 | PTPRF  |
| TP53 | PTPRF  |
| TP53 | RUNX3  |
| TP53 | RUNX3  |
| TP53 | SMG7   |
| TP53 | SMG7   |
| TP53 | SNX7   |
| TP53 | SNX7   |
| TP53 | TARBP1 |
| TP53 | TPM3   |
| TP53 | TRIM33 |
| TP53 | TRIM33 |
| TP53 | VANGL2 |
| TP53 | VANGL2 |

|              |       |
|--------------|-------|
| hsa-miR-23a  | MYC   |
| hsa-miR-23a  | SPI1  |
| hsa-miR-23b  | ESR2  |
| hsa-miR-23b  | MYC   |
| hsa-miR-24-1 | ESR2  |
| hsa-miR-24-2 | EGR1  |
| hsa-miR-25   | E2F1  |
| hsa-miR-26a  | MYC   |
| hsa-miR-26a  | MYC   |
| hsa-miR-26b  | MYC   |
| hsa-miR-27a  | EGR1  |
| hsa-miR-27a  | RUNX1 |
| hsa-miR-27b  | ESR2  |
| hsa-miR-29   | TP53  |
| hsa-miR-29a  | CEBPA |
| hsa-miR-29a  | MYC   |
| hsa-miR-29a  | NFKB1 |
| hsa-miR-29a  | YY1   |
| hsa-miR-29b  | CEBPA |
| hsa-miR-29b  | MYC   |
| hsa-miR-29b  | NFKB1 |
| hsa-miR-29b  | YY1   |
| hsa-miR-29c  | MYC   |
| hsa-miR-29c  | NFKB1 |
| hsa-miR-29c  | YY1   |
| hsa-miR-301b | EGR1  |
| hsa-miR-302a | SOX2  |
| hsa-miR-302b | SOX2  |
| hsa-miR-302c | SOX2  |
| hsa-miR-302d | SOX2  |
| hsa-miR-30a  | EGR1  |



|                |         |
|----------------|---------|
| hsa-miR-92b-3p | PCMTD1  |
| hsa-miR-93-5p  | ADARB1  |
| hsa-miR-93-5p  | CCNG2   |
| hsa-miR-93-5p  | E2F1    |
| hsa-miR-93-5p  | FCHO2   |
| hsa-miR-93-5p  | IRF1    |
| hsa-miR-93-5p  | KATNAL1 |
| hsa-miR-93-5p  | KLF11   |
| hsa-miR-93-5p  | LYST    |
| hsa-miR-93-5p  | MED12L  |
| hsa-miR-93-5p  | MFN2    |
| hsa-miR-93-5p  | NAA30   |
| hsa-miR-93-5p  | PDE3B   |
| hsa-miR-93-5p  | RB1     |
| hsa-miR-93-5p  | SERTAD2 |
| hsa-miR-93-5p  | ZNF148  |
| hsa-miR-9-5p   | CAPZA1  |
| hsa-miR-9-5p   | LDLRAP1 |
| hsa-miR-9-5p   | ONECUT2 |
| hsa-miR-9-5p   | PRDM1   |
| hsa-miR-9-5p   | PXDN    |
| hsa-miR-9-5p   | SNX7    |
| hsa-miR-96-5p  | PRDM16  |
| hsa-miR-98-5p  | FZD3    |
| hsa-miR-98-5p  | RGS16   |
| hsa-miR-99a-5p | MTOR    |
| hsa-miR-99b-5p | MTOR    |

|                |       |
|----------------|-------|
| hsa-miR-30a    | ESR2  |
| hsa-miR-30c-1  | EGR1  |
| hsa-miR-30c-2  | EGR1  |
| hsa-miR-30e    | EGR1  |
| hsa-miR-32     | EGR1  |
| hsa-miR-330-3p | E2F1  |
| hsa-miR-335    | EGR1  |
| hsa-miR-338    | SOX10 |
| hsa-miR-338    | SPI1  |
| hsa-miR-342    | SPI1  |
| hsa-miR-34a    | CEBPA |
| hsa-miR-34a    | CEBPA |
| hsa-miR-34a    | MYC   |
| hsa-miR-34a    | NFKB1 |
| hsa-miR-34a    | SNAI1 |
| hsa-miR-34a    | TP53  |
| hsa-miR-34a    | ZEB1  |
| hsa-miR-34b    | SNAI1 |
| hsa-miR-34b    | TP53  |
| hsa-miR-34b    | TP53  |
| hsa-miR-34b    | ZEB1  |
| hsa-miR-34c    | SP1   |
| hsa-miR-34c    | TP53  |
| hsa-miR-34c    | TP53  |
| hsa-miR-34c    | TP53  |

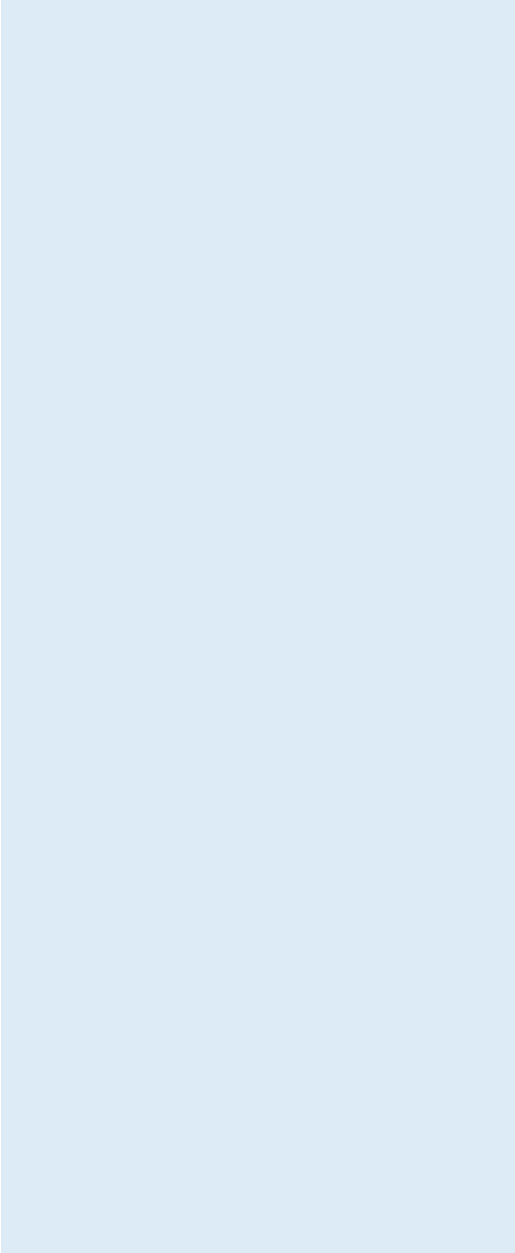

|                |       |
|----------------|-------|
| hsa-miR-34c-5p | MYC   |
| hsa-miR-363    | E2F1  |
| hsa-miR-365    | NFKB1 |
| hsa-miR-365    | SP1   |
| hsa-miR-367    | SOX2  |
| hsa-miR-372    | HIF1A |
| hsa-miR-373    | HIF1A |
| hsa-miR-375    | CTCF  |
| hsa-miR-378    | MYOD1 |
| hsa-miR-383-5p | IRF1  |
| hsa-miR-424    | HIF1A |
| hsa-miR-425    | EGR1  |
| hsa-miR-429    | ZEB1  |
| hsa-miR-429    | ZEB1  |
| hsa-miR-429    | ZEB2  |
| hsa-miR-429    | ZEB2  |
| hsa-miR-448    | NFKB1 |
| hsa-miR-449a   | E2F1  |
| hsa-miR-449a   | E2F1  |
| hsa-miR-449b   | E2F1  |
| hsa-miR-449b   | E2F1  |
| hsa-miR-449c   | E2F1  |
| hsa-miR-451    | GATA4 |
| hsa-miR-451    | SMAD3 |
| hsa-miR-451    | TCF3  |
| hsa-miR-455    | EGR1  |
| hsa-miR-485-5p | TP53  |
| hsa-miR-519d   | TP53  |
| hsa-miR-596    | EGR1  |
| hsa-miR-642a   | EGR1  |
| hsa-miR-709    | TCF3  |

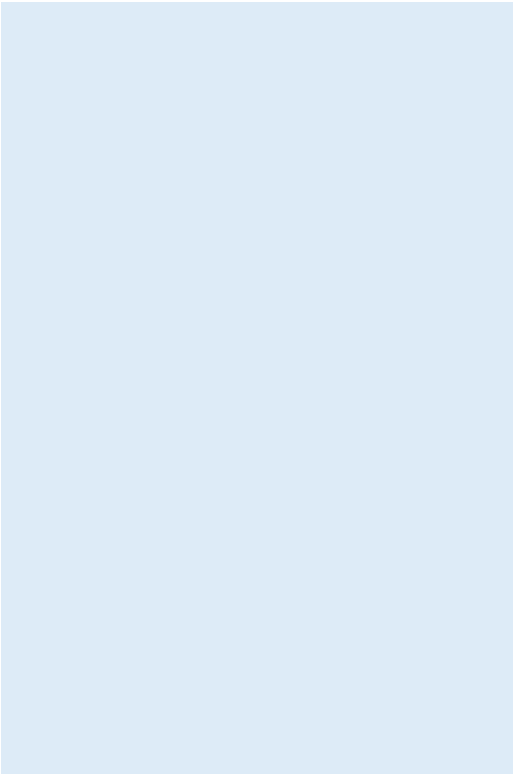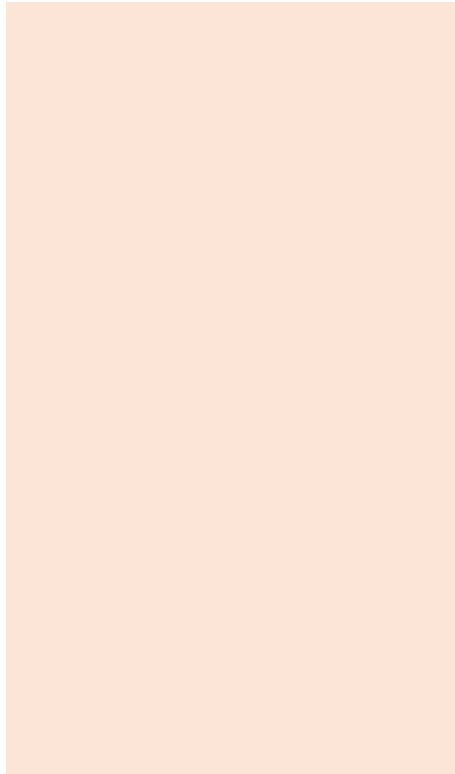

|               |       |
|---------------|-------|
| hsa-miR-7-5p  | RELA  |
| hsa-miR-9     | MYC   |
| hsa-miR-9     | NFKB1 |
| hsa-miR-9     | NFKB1 |
| hsa-miR-9-2   | CREB1 |
| hsa-miR-9-2   | REST  |
| hsa-miR-92a   | E2F1  |
| hsa-miR-92a   | MYC   |
| hsa-miR-92a-1 | SPI1  |
| hsa-miR-92a-2 | E2F1  |
| hsa-miR-92b   | EGR1  |
| hsa-miR-93    | E2F1  |
| hsa-miR-93    | MYC   |
| hsa-miR-93-5p | E2F1  |
| hsa-miR-93-5p | IRF1  |
| hsa-miR-93-5p | STAT3 |
| hsa-miR-96    | EGR1  |
| hsa-miR-99b   | EGR1  |
| miR-20b-5p    | STAT3 |
