# Supplementary material
Source: PubMed Central journal article supplement (PMC8687357)
Supplement: SYB2-10-219-s002.pdf [file SYB2-10-219-s002.pdf]

**Table S5:** Interactions between hub TFs and miRNAs in the generic network (as represented in Figure 1C)

| <b>Hub TF</b> | <b>miRNA</b>    | <b>Hub TF</b> | <b>Degree (i.e., number of interacting miRNAs)</b> |
|---------------|-----------------|---------------|----------------------------------------------------|
| E2F1          | hsa-miR-106a-5p | MYC           | 46                                                 |
| E2F1          | hsa-miR-106b-5p | E2F1          | 39                                                 |
| E2F1          | hsa-miR-17-5p   | EGR1          | 34                                                 |
| E2F1          | hsa-miR-20a-5p  | TP53          | 31                                                 |
| E2F1          | hsa-miR-330-3p  | NFKB1         | 23                                                 |
| E2F1          | hsa-miR-93-5p   | TGFB1         | 21                                                 |
| E2F1          | hsa-let-7a      | MYCN          | 17                                                 |
| E2F1          | hsa-let-7i      | ZEB1          | 16                                                 |
| E2F1          | hsa-miR-106a    | ERS1          | 16                                                 |
| E2F1          | hsa-miR-106b    | LIN28         | 16                                                 |
| E2F1          | hsa-miR-106b    | PTEN          | 16                                                 |
| E2F1          | hsa-miR-15a     | POU5F1        | 14                                                 |
| E2F1          | hsa-miR-15a     | SPI1          | 12                                                 |
| E2F1          | hsa-miR-15b     | STAT3         | 11                                                 |
| E2F1          | hsa-miR-15b     | LIN28B        | 11                                                 |
| E2F1          | hsa-miR-16      | RUNX2         | 11                                                 |
| E2F1          | hsa-miR-16-1    | HIF1A         | 10                                                 |
| E2F1          | hsa-miR-16-2    | ZEB2          | 10                                                 |
| E2F1          | hsa-miR-17      | STAT5         | 10                                                 |
| E2F1          | hsa-miR-17      | TWIST1        | 10                                                 |
| E2F1          | hsa-miR-18a     | E2F3          | 8                                                  |
| E2F1          | hsa-miR-18b     | EIF2C2        | 8                                                  |
| E2F1          | hsa-miR-195     | HMGA1         | 8                                                  |
| E2F1          | hsa-miR-19a     | TRIM32        | 8                                                  |
| E2F1          | hsa-miR-19b     |               |                                                    |
| E2F1          | hsa-miR-19b-2   |               |                                                    |
| E2F1          | hsa-miR-20a     |               |                                                    |
| E2F1          | hsa-miR-20b     |               |                                                    |

|      |               |
|------|---------------|
| E2F1 | hsa-miR-223   |
| E2F1 | hsa-miR-25    |
| E2F1 | hsa-miR-363   |
| E2F1 | hsa-miR-449a  |
| E2F1 | hsa-miR-449a  |
| E2F1 | hsa-miR-449b  |
| E2F1 | hsa-miR-449b  |
| E2F1 | hsa-miR-449c  |
| E2F1 | hsa-miR-92a   |
| E2F1 | hsa-miR-92a-2 |
| E2F1 | hsa-miR-93    |
| E2F3 | hsa-let-7a    |
| E2F3 | hsa-let-7i    |
| E2F3 | hsa-miR-106b  |
| E2F3 | hsa-miR-15a   |
| E2F3 | hsa-miR-15b   |
| E2F3 | hsa-miR-16    |
| E2F3 | hsa-miR-195   |
| E2F3 | hsa-miR-34a   |
| EGR1 | hsa-let-7e    |
| EGR1 | hsa-miR-106a  |
| EGR1 | hsa-miR-10a   |
| EGR1 | hsa-miR-124-3 |
| EGR1 | hsa-miR-125a  |
| EGR1 | hsa-miR-130b  |
| EGR1 | hsa-miR-132   |
| EGR1 | hsa-miR-142   |
| EGR1 | hsa-miR-146b  |
| EGR1 | hsa-miR-148a  |
| EGR1 | hsa-miR-149   |
| EGR1 | hsa-miR-183   |

|        |               |
|--------|---------------|
| EGR1   | hsa-miR-185   |
| EGR1   | hsa-miR-191   |
| EGR1   | hsa-miR-200b  |
| EGR1   | hsa-miR-212   |
| EGR1   | hsa-miR-219-2 |
| EGR1   | hsa-miR-23a   |
| EGR1   | hsa-miR-24-2  |
| EGR1   | hsa-miR-27a   |
| EGR1   | hsa-miR-301b  |
| EGR1   | hsa-miR-30a   |
| EGR1   | hsa-miR-30c-1 |
| EGR1   | hsa-miR-30c-2 |
| EGR1   | hsa-miR-30e   |
| EGR1   | hsa-miR-32    |
| EGR1   | hsa-miR-335   |
| EGR1   | hsa-miR-425   |
| EGR1   | hsa-miR-455   |
| EGR1   | hsa-miR-596   |
| EGR1   | hsa-miR-642a  |
| EGR1   | hsa-miR-92b   |
| EGR1   | hsa-miR-96    |
| EGR1   | hsa-miR-99b   |
| EIF2C2 | hsa-let-7a    |
| EIF2C2 | hsa-let-7b    |
| EIF2C2 | hsa-let-7c    |
| EIF2C2 | hsa-let-7d    |
| EIF2C2 | hsa-let-7e    |
| EIF2C2 | hsa-let-7f    |
| EIF2C2 | hsa-let-7g    |
| EIF2C2 | hsa-let-7i    |
| ERS1   | hsa-miR-106a  |

|       |                 |
|-------|-----------------|
| ERS1  | hsa-miR-17      |
| ERS1  | hsa-miR-18a     |
| ERS1  | hsa-miR-18b     |
| ERS1  | hsa-miR-19a     |
| ERS1  | hsa-miR-19b     |
| ERS1  | hsa-miR-19b-2   |
| ERS1  | hsa-miR-20a     |
| ERS1  | hsa-miR-20b     |
| ERS1  | hsa-miR-21      |
| ERS1  | hsa-miR-22      |
| ERS1  | hsa-miR-221     |
| ERS1  | hsa-miR-222     |
| ERS1  | hsa-miR-363     |
| ERS1  | hsa-miR-92a     |
| ERS1  | hsa-miR-92a-2   |
| HIF1A | hsa-miR-18a-5p  |
| HIF1A | hsa-miR-199b-5p |
| HIF1A | hsa-miR-20a-5p  |
| HIF1A | hsa-miR-20b-5p  |
| HIF1A | hsa-miR-210     |
| HIF1A | hsa-miR-210     |
| HIF1A | hsa-miR-210     |
| HIF1A | hsa-miR-372     |
| HIF1A | hsa-miR-373     |
| HIF1A | hsa-miR-424     |
| HMGA1 | hsa-let-7a-5p   |
| HMGA1 | hsa-let-7b-5p   |
| HMGA1 | hsa-miR-98-5p   |
| HMGA1 | hsa-miR-101-2   |
| HMGA1 | hsa-miR-196a-2  |
| HMGA1 | hsa-miR-222     |

|        |                |
|--------|----------------|
| HMGA1  | hsa-miR-29a    |
| HMGA1  | hsa-miR-331    |
| LIN28  | hsa-let-7a     |
| LIN28  | hsa-let-7a     |
| LIN28  | hsa-let-7b     |
| LIN28  | hsa-let-7b     |
| LIN28  | hsa-let-7c     |
| LIN28  | hsa-let-7c     |
| LIN28  | hsa-let-7d     |
| LIN28  | hsa-let-7d     |
| LIN28  | hsa-let-7e     |
| LIN28  | hsa-let-7e     |
| LIN28  | hsa-let-7f     |
| LIN28  | hsa-let-7f     |
| LIN28  | hsa-let-7g     |
| LIN28  | hsa-let-7g     |
| LIN28  | hsa-let-7i     |
| LIN28  | hsa-let-7i     |
| LIN28B | hsa-let-7b-5p  |
| LIN28B | hsa-let-7d-5p  |
| LIN28B | hsa-let-7a     |
| LIN28B | hsa-let-7b     |
| LIN28B | hsa-let-7c     |
| LIN28B | hsa-let-7d     |
| LIN28B | hsa-let-7e     |
| LIN28B | hsa-let-7f     |
| LIN28B | hsa-let-7g     |
| LIN28B | hsa-let-7g     |
| LIN28B | hsa-let-7i     |
| MYC    | hsa-miR-34c-5p |
| MYC    | hsa-let-7      |

|     |              |
|-----|--------------|
| MYC | hsa-let-7a   |
| MYC | hsa-let-7a-1 |
| MYC | hsa-let-7b   |
| MYC | hsa-let-7c   |
| MYC | hsa-let-7d   |
| MYC | hsa-let-7d   |
| MYC | hsa-let-7e   |
| MYC | hsa-let-7f   |
| MYC | hsa-let-7f-1 |
| MYC | hsa-let-7g   |
| MYC | hsa-let-7i   |
| MYC | hsa-miR-106a |
| MYC | hsa-miR-106a |
| MYC | hsa-miR-106b |
| MYC | hsa-miR-141  |
| MYC | hsa-miR-15a  |
| MYC | hsa-miR-16-1 |
| MYC | hsa-miR-17   |
| MYC | hsa-miR-18a  |
| MYC | hsa-miR-195  |
| MYC | hsa-miR-19a  |
| MYC | hsa-miR-19a  |
| MYC | hsa-miR-19b  |
| MYC | hsa-miR-19b  |
| MYC | hsa-miR-19b  |
| MYC | hsa-miR-20a  |
| MYC | hsa-miR-20a  |
| MYC | hsa-miR-20b  |
| MYC | hsa-miR-22   |

|       |                |
|-------|----------------|
| MYC   | hsa-miR-221    |
| MYC   | hsa-miR-23a    |
| MYC   | hsa-miR-23b    |
| MYC   | hsa-miR-26a    |
| MYC   | hsa-miR-26a    |
| MYC   | hsa-miR-26b    |
| MYC   | hsa-miR-29a    |
| MYC   | hsa-miR-29b    |
| MYC   | hsa-miR-29c    |
| MYC   | hsa-miR-34a    |
| MYC   | hsa-miR-9      |
| MYC   | hsa-miR-92a    |
| MYC   | hsa-miR-93     |
| MYCN  | hsa-miR-101-3p |
| MYCN  | hsa-miR-202-3p |
| MYCN  | hsa-miR-29a-3p |
| MYCN  | hsa-miR-29b-3p |
| MYCN  | hsa-miR-29c-3p |
| MYCN  | hsa-miR-106a   |
| MYCN  | hsa-miR-17     |
| MYCN  | hsa-miR-18a    |
| MYCN  | hsa-miR-18a    |
| MYCN  | hsa-miR-19a    |
| MYCN  | hsa-miR-19a    |
| MYCN  | hsa-miR-19b    |
| MYCN  | hsa-miR-20a    |
| MYCN  | hsa-miR-221    |
| MYCN  | hsa-miR-335    |
| MYCN  | hsa-miR-421    |
| MYCN  | hsa-miR-92a    |
| NFKB1 | hsa-let-7a-3   |

|        |                |
|--------|----------------|
| NFKB1  | hsa-let-7b     |
| NFKB1  | hsa-miR-10b    |
| NFKB1  | hsa-miR-125b   |
| NFKB1  | hsa-miR-146a   |
| NFKB1  | hsa-miR-146a   |
| NFKB1  | hsa-miR-155    |
| NFKB1  | hsa-miR-155    |
| NFKB1  | hsa-miR-16     |
| NFKB1  | hsa-miR-17     |
| NFKB1  | hsa-miR-199a-2 |
| NFKB1  | hsa-miR-21     |
| NFKB1  | hsa-miR-21     |
| NFKB1  | hsa-miR-214    |
| NFKB1  | hsa-miR-224    |
| NFKB1  | hsa-miR-29a    |
| NFKB1  | hsa-miR-29b    |
| NFKB1  | hsa-miR-29c    |
| NFKB1  | hsa-miR-34a    |
| NFKB1  | hsa-miR-365    |
| NFKB1  | hsa-miR-448    |
| NFKB1  | hsa-miR-9      |
| NFKB1  | hsa-miR-9      |
| POU5F1 | hsa-miR-302a   |
| POU5F1 | hsa-miR-302a   |
| POU5F1 | hsa-miR-302a   |
| POU5F1 | hsa-miR-302b   |
| POU5F1 | hsa-miR-302b   |
| POU5F1 | hsa-miR-302b   |
| POU5F1 | hsa-miR-302c   |
| POU5F1 | hsa-miR-302c   |
| POU5F1 | hsa-miR-302c   |



|        |                |
|--------|----------------|
| POU5F1 | hsa-miR-302d   |
| POU5F1 | hsa-miR-302d   |
| POU5F1 | hsa-miR-302d   |
| POU5F1 | hsa-miR-367    |
| POU5F1 | hsa-miR-367    |
| PTEN   | hsa-miR-19a-3p |
| PTEN   | hsa-miR-19b-3p |
| Pten   | hsa-miR-217    |
| PTEN   | hsa-miR-26a-5p |
| PTEN   | hsa-miR-29a-3p |
| PTEN   | hsa-miR-29b-3p |
| PTEN   | hsa-miR-19a    |
| PTEN   | hsa-miR-21     |
| PTEN   | hsa-miR-21     |
| PTEN   | hsa-miR-22     |
| PTEN   | hsa-miR-25     |
| PTEN   | hsa-miR-302a   |
| PTEN   | hsa-miR-302b   |
| PTEN   | hsa-miR-302c   |
| PTEN   | hsa-miR-302d   |
| PTEN   | hsa-miR-302f   |
| RUNX2  | hsa-miR-30a-5p |
| RUNX2  | hsa-miR-30b-5p |
| RUNX2  | hsa-miR-30d-5p |
| RUNX2  | hsa-miR-23a    |
| RUNX2  | hsa-miR-23a    |
| RUNX2  | hsa-miR-24-2   |
| RUNX2  | hsa-miR-24-2   |
| RUNX2  | hsa-miR-27a    |
| RUNX2  | hsa-miR-27a    |
| RUNX2  | hsa-miR-2861   |

|       |                |
|-------|----------------|
| RUNX2 | hsa-miR-3960   |
| SPI1  | hsa-miR-146a   |
| SPI1  | hsa-miR-146a   |
| SPI1  | hsa-miR-155    |
| SPI1  | hsa-miR-17     |
| SPI1  | hsa-miR-18a    |
| SPI1  | hsa-miR-19a    |
| SPI1  | hsa-miR-19b-1  |
| SPI1  | hsa-miR-20a    |
| SPI1  | hsa-miR-23a    |
| SPI1  | hsa-miR-338    |
| SPI1  | hsa-miR-342    |
| SPI1  | hsa-miR-92a-1  |
| STAT3 | hsa-miR-20a-5p |
| STAT3 | hsa-miR-20b-5p |
| STAT3 | hsa-miR-21-5p  |
| STAT3 | hsa-miR-93-5p  |
| STAT3 | hsa-miR-125b   |
| STAT3 | hsa-miR-135b   |
| STAT3 | hsa-miR-181b-1 |
| STAT3 | hsa-miR-21     |
| STAT5 | hsa-miR-15a    |
| STAT5 | hsa-miR-15b    |
| STAT5 | hsa-miR-16     |
| STAT5 | hsa-miR-17     |
| STAT5 | hsa-miR-18a    |
| STAT5 | hsa-miR-195    |
| STAT5 | hsa-miR-19a    |

|       |                 |
|-------|-----------------|
| STAT5 | hsa-miR-19b-1   |
| STAT5 | hsa-miR-20a     |
| STAT5 | hsa-miR-92a-1   |
| TGFB1 | hsa-let-7d      |
| TGFB1 | hsa-miR-141     |
| TGFB1 | hsa-miR-143     |
| TGFB1 | hsa-miR-146a    |
| TGFB1 | hsa-miR-155     |
| TGFB1 | hsa-miR-181b-1  |
| TGFB1 | hsa-miR-181b-2  |
| TGFB1 | hsa-miR-192     |
| TGFB1 | hsa-miR-194     |
| TGFB1 | hsa-miR-200a    |
| TGFB1 | hsa-miR-200b    |
| TGFB1 | hsa-miR-200c    |
| TGFB1 | hsa-miR-205     |
| TGFB1 | hsa-miR-224     |
| TGFB1 | hsa-miR-23a     |
| TGFB1 | hsa-miR-24      |
| TGFB1 | hsa-miR-24      |
| TGFB1 | hsa-miR-24      |
| TGFB1 | hsa-miR-27a     |
| TGFB1 | hsa-miR-29a     |
| TGFB1 | hsa-miR-429     |
| TP53  | hsa-miR-125a-5p |
| TP53  | hsa-miR-485-5p  |
| TP53  | hsa-miR-107     |
| TP53  | hsa-miR-107     |
| TP53  | hsa-miR-125b    |
| TP53  | hsa-miR-143     |
| TP53  | hsa-miR-145     |

|        |              |
|--------|--------------|
| TP53   | hsa-miR-145  |
| TP53   | hsa-miR-155  |
| TP53   | hsa-miR-192  |
| TP53   | hsa-miR-192  |
| TP53   | hsa-miR-192  |
| TP53   | hsa-miR-194  |
| TP53   | hsa-miR-200a |
| TP53   | hsa-miR-200b |
| TP53   | hsa-miR-200c |
| TP53   | hsa-miR-215  |
| TP53   | hsa-miR-29   |
| TP53   | hsa-miR-34a  |
| TP53   | hsa-miR-34b  |
| TP53   | hsa-miR-34b  |
| TP53   | hsa-miR-34c  |
| TP53   | hsa-miR-34c  |
| TP53   | hsa-miR-34c  |
| TP53   | hsa-miR-519d |
| TRIM32 | hsa-let-7a   |
| TRIM32 | hsa-let-7b   |
| TRIM32 | hsa-let-7c   |
| TRIM32 | hsa-let-7d   |
| TRIM32 | hsa-let-7e   |
| TRIM32 | hsa-let-7f   |
| TRIM32 | hsa-let-7g   |

|        |                 |
|--------|-----------------|
| TRIM32 | hsa-let-7i      |
| TWIST1 | hsa-miR-10b     |
| TWIST1 | hsa-miR-10b     |
| TWIST1 | hsa-miR-199a-2  |
| TWIST1 | hsa-miR-200a    |
| TWIST1 | hsa-miR-200b    |
| TWIST1 | hsa-miR-200c    |
| TWIST1 | hsa-miR-205     |
| TWIST1 | hsa-miR-214     |
| TWIST1 | hsa-miR-372     |
| TWIST1 | hsa-miR-373     |
| ZEB1   | hsa-miR-141-3p  |
| ZEB1   | hsa-miR-200a-3p |
| ZEB1   | hsa-miR-200b-3p |
| ZEB1   | hsa-miR-200c-3p |
| ZEB1   | hsa-miR-205-5p  |
| ZEB1   | hsa-miR-429     |
| ZEB1   | hsa-let-7       |
| ZEB1   | hsa-miR-141     |
| ZEB1   | hsa-miR-141     |
| ZEB1   | hsa-miR-200a    |
| ZEB1   | hsa-miR-200b    |
| ZEB1   | hsa-miR-200c    |
| ZEB1   | hsa-miR-200c    |
| ZEB1   | hsa-miR-34a     |
| ZEB1   | hsa-miR-34b     |
| ZEB1   | hsa-miR-429     |
| ZEB2   | hsa-miR-141-3p  |
| ZEB2   | hsa-miR-200a-3p |
| ZEB2   | hsa-miR-200b-3p |
| ZEB2   | hsa-miR-200c-3p |

|      |              |
|------|--------------|
| ZEB2 | hsa-miR-429  |
| ZEB2 | hsa-miR-141  |
| ZEB2 | hsa-miR-200a |
| ZEB2 | hsa-miR-200b |
| ZEB2 | hsa-miR-200c |
| ZEB2 | hsa-miR-429  |
