# Supplementary material
Source: PubMed Central journal article supplement (PMC8687357)
Supplement: SYB2-10-219-s003.pdf [file SYB2-10-219-s003.pdf]

**Table S3:** Interactions between hub miRNAs and their targeted genes in the generic network (as represented in Figure 1A)

| Hub miRNA     | Target Gene | Hub miRNA       | Degree (i.e., number of targeted genes) |
|---------------|-------------|-----------------|-----------------------------------------|
| hsa-let-7b-5p | CCNJ        | hsa-miR-124-3p  | 139                                     |
| hsa-let-7b-5p | CHD4        | hsa-miR-16-5p   | 128                                     |
| hsa-let-7b-5p | COIL        | hsa-miR-93-5p   | 79                                      |
| hsa-let-7b-5p | DMD         | hsa-miR-1       | 70                                      |
| hsa-let-7b-5p | E2F5        | hsa-miR-19b-3p  | 57                                      |
| hsa-let-7b-5p | E2F6        | hsa-miR-130b-3p | 55                                      |
| hsa-let-7b-5p | EIF4G2      | hsa-miR-30a-5p  | 44                                      |
| hsa-let-7b-5p | FAM178A     | hsa-miR-32-5p   | 44                                      |
| hsa-let-7b-5p | FNDC3A      | hsa-miR-101-3p  | 38                                      |
| hsa-let-7b-5p | GRPEL2      | hsa-miR-103a-3p | 31                                      |
| hsa-let-7b-5p | HAND1       | hsa-miR-17-5p   | 31                                      |
| hsa-let-7b-5p | HMGA1       | hsa-miR-181a-5p | 30                                      |
| hsa-let-7b-5p | HMGA2       | hsa-miR-7-5p    | 30                                      |
| hsa-let-7b-5p | IGF2BP3     | hsa-let-7b-5p   | 28                                      |
| hsa-let-7b-5p | LIN28B      | hsa-miR-26b-5p  | 28                                      |
| hsa-let-7b-5p | NME6        | hsa-miR-29c-3p  | 28                                      |
| hsa-let-7b-5p | NRAS        | hsa-miR-34a-5p  | 28                                      |
| hsa-let-7b-5p | PCGF3       | hsa-miR-155-5p  | 26                                      |
| hsa-let-7b-5p | PDP2        | hsa-miR-21-5p   | 25                                      |
| hsa-let-7b-5p | PGRMC1      | hsa-miR-98-5p   | 25                                      |
| hsa-let-7b-5p | PLAGL2      | hsa-miR-106b-5p | 24                                      |
| hsa-let-7b-5p | PRTG        | hsa-miR-20a-5p  | 24                                      |
| hsa-let-7b-5p | RDX         | hsa-miR-24-3p   | 24                                      |
| hsa-let-7b-5p | SMC1A       | hsa-miR-92a-3p  | 24                                      |
| hsa-let-7b-5p | SPRYD4      | hsa-miR-128-3p  | 23                                      |
| hsa-let-7b-5p | TAF9B       | hsa-miR-30b-5p  | 21                                      |
| hsa-let-7b-5p | TMEM2       | hsa-miR-148b-3p | 20                                      |
| hsa-let-7b-5p | UTRN        | hsa-miR-186-5p  | 20                                      |

|               |          |
|---------------|----------|
| hsa-let-7d-5p | CEP120   |
| hsa-let-7d-5p | HAND1    |
| hsa-let-7d-5p | HMGA2    |
| hsa-let-7d-5p | IGF1R    |
| hsa-let-7d-5p | IGF2BP3  |
| hsa-let-7d-5p | LIN28B   |
| hsa-let-7d-5p | NHLRC3   |
| hsa-let-7d-5p | PCGF3    |
| hsa-let-7d-5p | RPUSD2   |
| hsa-let-7d-5p | SLC10A7  |
| hsa-let-7d-5p | SLC20A1  |
| hsa-let-7d-5p | SMARCAD1 |
| hsa-let-7d-5p | SPRYD4   |
| hsa-let-7d-5p | STK40    |
| hsa-let-7d-5p | TGFBR1   |
| hsa-let-7d-5p | TMEM2    |
| hsa-miR-1     | FoxP1    |
| hsa-miR-1     | HDAC4    |
| hsa-miR-1     | KCNJ2    |
| hsa-miR-1     | MET      |
| hsa-miR-1     | ACPL2    |
| hsa-miR-1     | ADAR     |
| hsa-miR-1     | ANKIB1   |
| hsa-miR-1     | ARCN1    |
| hsa-miR-1     | ARF3     |
| hsa-miR-1     | ARF4     |
| hsa-miR-1     | ARHGEF18 |
| hsa-miR-1     | ATP6V1B2 |
| hsa-miR-1     | AXL      |
| hsa-miR-1     | BDNF     |
| hsa-miR-1     | BLCAP    |

|                 |    |
|-----------------|----|
| hsa-miR-27a-3p  | 19 |
| hsa-miR-9-5p    | 19 |
| hsa-miR-30c-5p  | 17 |
| hsa-let-7d-5p   | 16 |
| hsa-miR-148a-3p | 15 |
| hsa-miR-15b-5p  | 15 |

|           |          |
|-----------|----------|
| hsa-miR-1 | C12orf49 |
| hsa-miR-1 | CAND1    |
| hsa-miR-1 | CAP1     |
| hsa-miR-1 | CDK9     |
| hsa-miR-1 | CHST11   |
| hsa-miR-1 | CHSY1    |
| hsa-miR-1 | CLCN3    |
| hsa-miR-1 | CNN3     |
| hsa-miR-1 | DDX5     |
| hsa-miR-1 | DHX15    |
| hsa-miR-1 | EML4     |
| hsa-miR-1 | EPB41L4B |
| hsa-miR-1 | FAM57A   |
| hsa-miR-1 | G6PD     |
| hsa-miR-1 | GCH1     |
| hsa-miR-1 | GJA1     |
| hsa-miR-1 | H3F3B    |
| hsa-miR-1 | HCN4     |
| hsa-miR-1 | HPS4     |
| hsa-miR-1 | HSPD1    |
| hsa-miR-1 | IFT52    |
| hsa-miR-1 | INPP5F   |
| hsa-miR-1 | KIF2A    |
| hsa-miR-1 | LASP1    |
| hsa-miR-1 | LIN7C    |
| hsa-miR-1 | MMD      |
| hsa-miR-1 | MTMR12   |
| hsa-miR-1 | MTX1     |
| hsa-miR-1 | MXD4     |
| hsa-miR-1 | OAT      |
| hsa-miR-1 | PDCD4    |

|                |          |
|----------------|----------|
| hsa-miR-1      | PGM2     |
| hsa-miR-1      | PIM1     |
| hsa-miR-1      | POGK     |
| hsa-miR-1      | POLR2K   |
| hsa-miR-1      | RABGAP1L |
| hsa-miR-1      | RBM47    |
| hsa-miR-1      | RNF138   |
| hsa-miR-1      | SERP1    |
| hsa-miR-1      | SERPINB5 |
| hsa-miR-1      | SLC25A30 |
| hsa-miR-1      | SLC44A1  |
| hsa-miR-1      | SRXN1    |
| hsa-miR-1      | TAGLN2   |
| hsa-miR-1      | TDP1     |
| hsa-miR-1      | TIMP3    |
| hsa-miR-1      | TPM4     |
| hsa-miR-1      | TRAPPC3  |
| hsa-miR-1      | TRIM2    |
| hsa-miR-1      | TSPAN4   |
| hsa-miR-1      | TWF1     |
| hsa-miR-1      | UHMK1    |
| hsa-miR-1      | UST      |
| hsa-miR-1      | XPNPEP3  |
| hsa-miR-1      | ZNF264   |
| hsa-miR-101-3p | AEBP2    |
| hsa-miR-101-3p | ARAP2    |
| hsa-miR-101-3p | ARID1A   |
| hsa-miR-101-3p | ATXN1    |
| hsa-miR-101-3p | BCL9     |
| hsa-miR-101-3p | CAPN2    |
| hsa-miR-101-3p | CBFA2T2  |

|                |         |
|----------------|---------|
| hsa-miR-101-3p | CERS2   |
| hsa-miR-101-3p | DDIT4   |
| hsa-miR-101-3p | DNMT3A  |
| hsa-miR-101-3p | DUSP1   |
| hsa-miR-101-3p | EED     |
| hsa-miR-101-3p | EZH2    |
| hsa-miR-101-3p | FBN2    |
| hsa-miR-101-3p | FBXW7   |
| hsa-miR-101-3p | FOS     |
| hsa-miR-101-3p | FZD6    |
| hsa-miR-101-3p | ICK     |
| hsa-miR-101-3p | INO80D  |
| hsa-miR-101-3p | LCOR    |
| hsa-miR-101-3p | LIN7C   |
| hsa-miR-101-3p | LMNB1   |
| hsa-miR-101-3p | MFSD6   |
| hsa-miR-101-3p | MPPE1   |
| hsa-miR-101-3p | MYCN    |
| hsa-miR-101-3p | NEK7    |
| hsa-miR-101-3p | NUPL2   |
| hsa-miR-101-3p | PIP5K1C |
| hsa-miR-101-3p | PTGS2   |
| hsa-miR-101-3p | RAB5A   |
| hsa-miR-101-3p | RANBP9  |
| hsa-miR-101-3p | SEPT11  |
| hsa-miR-101-3p | SLC38A2 |
| hsa-miR-101-3p | SMARCD1 |
| hsa-miR-101-3p | STAMBP  |
| hsa-miR-101-3p | SUB1    |
| hsa-miR-101-3p | TGFBR1  |
| hsa-miR-101-3p | TGFBR3  |

|                 |         |
|-----------------|---------|
| hsa-miR-103a-3p | AGFG1   |
| hsa-miR-103a-3p | ARL4C   |
| hsa-miR-103a-3p | ASH1L   |
| hsa-miR-103a-3p | ATP13A3 |
| hsa-miR-103a-3p | AXIN2   |
| hsa-miR-103a-3p | CAPZA2  |
| hsa-miR-103a-3p | CLIP1   |
| hsa-miR-103a-3p | CNNM2   |
| hsa-miR-103a-3p | DICER1  |
| hsa-miR-103a-3p | FBXW7   |
| hsa-miR-103a-3p | ITGA2   |
| hsa-miR-103a-3p | JAKMIP2 |
| hsa-miR-103a-3p | LCOR    |
| hsa-miR-103a-3p | MTMR4   |
| hsa-miR-103a-3p | N4BP1   |
| hsa-miR-103a-3p | NDEL1   |
| hsa-miR-103a-3p | NUP50   |
| hsa-miR-103a-3p | POLD3   |
| hsa-miR-103a-3p | PRKAB2  |
| hsa-miR-103a-3p | RAB1B   |
| hsa-miR-103a-3p | RNMT    |
| hsa-miR-103a-3p | SALL1   |
| hsa-miR-103a-3p | SIPA1L2 |
| hsa-miR-103a-3p | SOWAHC  |
| hsa-miR-103a-3p | SPATS2L |
| hsa-miR-103a-3p | SUN2    |
| hsa-miR-103a-3p | SYNJ1   |
| hsa-miR-103a-3p | TPD52   |
| hsa-miR-103a-3p | YWHAH   |
| hsa-miR-103a-3p | ZHX1    |
| hsa-miR-103a-3p | ZNRF2   |

|                 |         |
|-----------------|---------|
| hsa-miR-106b-5p | AP2B1   |
| hsa-miR-106b-5p | ATAD2   |
| hsa-miR-106b-5p | BRMS1L  |
| hsa-miR-106b-5p | BTG3    |
| hsa-miR-106b-5p | C9orf40 |
| hsa-miR-106b-5p | CLOCK   |
| hsa-miR-106b-5p | CNOT6L  |
| hsa-miR-106b-5p | CNOT7   |
| hsa-miR-106b-5p | CROT    |
| hsa-miR-106b-5p | E2F1    |
| hsa-miR-106b-5p | EIF5A2  |
| hsa-miR-106b-5p | ELK3    |
| hsa-miR-106b-5p | FAM199X |
| hsa-miR-106b-5p | JAK1    |
| hsa-miR-106b-5p | KAT2B   |
| hsa-miR-106b-5p | KATNAL1 |
| hsa-miR-106b-5p | PKD2    |
| hsa-miR-106b-5p | PRRG1   |
| hsa-miR-106b-5p | RB1     |
| hsa-miR-106b-5p | RBL2    |
| hsa-miR-106b-5p | RBM12B  |
| hsa-miR-106b-5p | RORA    |
| hsa-miR-106b-5p | USP46   |
| hsa-miR-106b-5p | WEE1    |
| hsa-miR-124-3p  | AMMECR1 |
| hsa-miR-124-3p  | ANKRD27 |
| hsa-miR-124-3p  | ANXA11  |
| hsa-miR-124-3p  | ARMC1   |
| hsa-miR-124-3p  | B4GALT1 |
| hsa-miR-124-3p  | C3orf58 |
| hsa-miR-124-3p  | CBX2    |

|                |          |
|----------------|----------|
| hsa-miR-124-3p | CD164    |
| hsa-miR-124-3p | CDH2     |
| hsa-miR-124-3p | CHST14   |
| hsa-miR-124-3p | CHSY1    |
| hsa-miR-124-3p | CLMP     |
| hsa-miR-124-3p | CMTM4    |
| hsa-miR-124-3p | COL4A1   |
| hsa-miR-124-3p | CREB3L2  |
| hsa-miR-124-3p | CRTC3    |
| hsa-miR-124-3p | CTDSP1   |
| hsa-miR-124-3p | CTDSP2   |
| hsa-miR-124-3p | CTNND1   |
| hsa-miR-124-3p | CYB5A    |
| hsa-miR-124-3p | DDX3X    |
| hsa-miR-124-3p | DDX6     |
| hsa-miR-124-3p | DHCR24   |
| hsa-miR-124-3p | DNAJC1   |
| hsa-miR-124-3p | DSG2     |
| hsa-miR-124-3p | ECI2     |
| hsa-miR-124-3p | EEA1     |
| hsa-miR-124-3p | EIF3B    |
| hsa-miR-124-3p | ELK3     |
| hsa-miR-124-3p | EVI5     |
| hsa-miR-124-3p | EYA4     |
| hsa-miR-124-3p | FAM129B  |
| hsa-miR-124-3p | FAM171A1 |
| hsa-miR-124-3p | FAM177A1 |
| hsa-miR-124-3p | FAM199X  |
| hsa-miR-124-3p | FAM57A   |
| hsa-miR-124-3p | FCHO2    |
| hsa-miR-124-3p | FLOT2    |



|                |         |
|----------------|---------|
| hsa-miR-124-3p | FPGS    |
| hsa-miR-124-3p | FRMD6   |
| hsa-miR-124-3p | FRMD8   |
| hsa-miR-124-3p | GGA2    |
| hsa-miR-124-3p | GNG10   |
| hsa-miR-124-3p | GRB2    |
| hsa-miR-124-3p | GSN     |
| hsa-miR-124-3p | GXYLT1  |
| hsa-miR-124-3p | HEBP2   |
| hsa-miR-124-3p | HIPK3   |
| hsa-miR-124-3p | HTATIP2 |
| hsa-miR-124-3p | IQGAP1  |
| hsa-miR-124-3p | ITGA3   |
| hsa-miR-124-3p | ITGB1   |
| hsa-miR-124-3p | KANK1   |
| hsa-miR-124-3p | KANK2   |
| hsa-miR-124-3p | KLF6    |
| hsa-miR-124-3p | KLHL24  |
| hsa-miR-124-3p | LAMC1   |
| hsa-miR-124-3p | LRIG1   |
| hsa-miR-124-3p | LRRC1   |
| hsa-miR-124-3p | LRRC58  |
| hsa-miR-124-3p | MAGT1   |
| hsa-miR-124-3p | MAPK14  |
| hsa-miR-124-3p | MYH9    |
| hsa-miR-124-3p | NECAP2  |
| hsa-miR-124-3p | NEK9    |
| hsa-miR-124-3p | NID1    |
| hsa-miR-124-3p | NKAP    |
| hsa-miR-124-3p | NR4A1   |
| hsa-miR-124-3p | NSUN2   |

|                |         |
|----------------|---------|
| hsa-miR-124-3p | NT5E    |
| hsa-miR-124-3p | OAF     |
| hsa-miR-124-3p | OSBPL8  |
| hsa-miR-124-3p | PAPSS2  |
| hsa-miR-124-3p | PARP16  |
| hsa-miR-124-3p | PGRMC2  |
| hsa-miR-124-3p | PI4K2B  |
| hsa-miR-124-3p | PIK3C2A |
| hsa-miR-124-3p | PLEKHF2 |
| hsa-miR-124-3p | PLSCR3  |
| hsa-miR-124-3p | PLXNB2  |
| hsa-miR-124-3p | POGLUT1 |
| hsa-miR-124-3p | PPP1R3B |
| hsa-miR-124-3p | PRPS1   |
| hsa-miR-124-3p | PRRX1   |
| hsa-miR-124-3p | PSKH1   |
| hsa-miR-124-3p | PTBP1   |
| hsa-miR-124-3p | PTBP3   |
| hsa-miR-124-3p | PTPN12  |
| hsa-miR-124-3p | PTPN9   |
| hsa-miR-124-3p | PTPRJ   |
| hsa-miR-124-3p | QKI     |
| hsa-miR-124-3p | QSOX1   |
| hsa-miR-124-3p | RAB34   |
| hsa-miR-124-3p | RAB38   |
| hsa-miR-124-3p | RBM24   |
| hsa-miR-124-3p | RBM47   |
| hsa-miR-124-3p | RDH10   |
| hsa-miR-124-3p | RELA    |
| hsa-miR-124-3p | RFFL    |
| hsa-miR-124-3p | RHBDF1  |

|                |          |
|----------------|----------|
| hsa-miR-124-3p | RHOG     |
| hsa-miR-124-3p | RNPEPL1  |
| hsa-miR-124-3p | SBNO2    |
| hsa-miR-124-3p | SCAMP2   |
| hsa-miR-124-3p | SERTAD2  |
| hsa-miR-124-3p | SERTAD4  |
| hsa-miR-124-3p | SGK1     |
| hsa-miR-124-3p | SGMS1    |
| hsa-miR-124-3p | SGPL1    |
| hsa-miR-124-3p | SIX4     |
| hsa-miR-124-3p | SLC16A1  |
| hsa-miR-124-3p | SLC17A5  |
| hsa-miR-124-3p | SLC29A1  |
| hsa-miR-124-3p | SLC30A7  |
| hsa-miR-124-3p | SLC35G1  |
| hsa-miR-124-3p | SMAD5    |
| hsa-miR-124-3p | SNX18    |
| hsa-miR-124-3p | SOS2     |
| hsa-miR-124-3p | SP1      |
| hsa-miR-124-3p | SSFA2    |
| hsa-miR-124-3p | STOM     |
| hsa-miR-124-3p | STT3A    |
| hsa-miR-124-3p | SYPL1    |
| hsa-miR-124-3p | TARBP1   |
| hsa-miR-124-3p | TFEB     |
| hsa-miR-124-3p | TJP2     |
| hsa-miR-124-3p | TMEM109  |
| hsa-miR-124-3p | TMEM184B |
| hsa-miR-124-3p | TOM1L1   |
| hsa-miR-124-3p | TOR3A    |
| hsa-miR-124-3p | TP53INP1 |

|                |          |
|----------------|----------|
| hsa-miR-124-3p | TPST2    |
| hsa-miR-124-3p | TSC22D4  |
| hsa-miR-124-3p | TTC7A    |
| hsa-miR-124-3p | TUB      |
| hsa-miR-124-3p | TWSG1    |
| hsa-miR-124-3p | VAMP3    |
| hsa-miR-124-3p | WIPF1    |
| hsa-miR-124-3p | ZCCHC24  |
| hsa-miR-128-3p | AFF4     |
| hsa-miR-128-3p | ALDH4A1  |
| hsa-miR-128-3p | ARHGAP12 |
| hsa-miR-128-3p | BAG2     |
| hsa-miR-128-3p | EIF2S2   |
| hsa-miR-128-3p | GPAM     |
| hsa-miR-128-3p | MOB1B    |
| hsa-miR-128-3p | NEK2     |
| hsa-miR-128-3p | RELN     |
| hsa-miR-128-3p | RNF182   |
| hsa-miR-128-3p | RPS6KA5  |
| hsa-miR-128-3p | SEC61A1  |
| hsa-miR-128-3p | SETD7    |
| hsa-miR-128-3p | SFXN2    |
| hsa-miR-128-3p | SH3RF1   |
| hsa-miR-128-3p | SLC5A3   |
| hsa-miR-128-3p | TGFBR1   |
| hsa-miR-128-3p | TMEM30A  |
| hsa-miR-128-3p | TUB      |
| hsa-miR-128-3p | UBE2W    |
| hsa-miR-128-3p | VEGFC    |
| hsa-miR-128-3p | VPS4B    |
| hsa-miR-128-3p | ZNF652   |

|                 |          |
|-----------------|----------|
| hsa-miR-130b-3p | ACVR1    |
| hsa-miR-130b-3p | ARHGAP1  |
| hsa-miR-130b-3p | ARHGAP12 |
| hsa-miR-130b-3p | ARID4B   |
| hsa-miR-130b-3p | ARL6IP1  |
| hsa-miR-130b-3p | BLCAP    |
| hsa-miR-130b-3p | C16orf70 |
| hsa-miR-130b-3p | CBFB     |
| hsa-miR-130b-3p | CDK19    |
| hsa-miR-130b-3p | CLIP1    |
| hsa-miR-130b-3p | DDX6     |
| hsa-miR-130b-3p | DICER1   |
| hsa-miR-130b-3p | DYNLL2   |
| hsa-miR-130b-3p | ENPP5    |
| hsa-miR-130b-3p | FBXO28   |
| hsa-miR-130b-3p | GRB10    |
| hsa-miR-130b-3p | HABP4    |
| hsa-miR-130b-3p | HEG1     |
| hsa-miR-130b-3p | HIVEP2   |
| hsa-miR-130b-3p | JARID2   |
| hsa-miR-130b-3p | LDLR     |
| hsa-miR-130b-3p | LRP8     |
| hsa-miR-130b-3p | MB21D2   |
| hsa-miR-130b-3p | MBNL1    |
| hsa-miR-130b-3p | MID1IP1  |
| hsa-miR-130b-3p | MPHOSPH9 |
| hsa-miR-130b-3p | NAA30    |
| hsa-miR-130b-3p | NCKAP5   |
| hsa-miR-130b-3p | NDEL1    |
| hsa-miR-130b-3p | PPARG    |
| hsa-miR-130b-3p | PPP6R3   |

|                 |           |
|-----------------|-----------|
| hsa-miR-130b-3p | PRKAA1    |
| hsa-miR-130b-3p | PRUNE2    |
| hsa-miR-130b-3p | PSAP      |
| hsa-miR-130b-3p | PTP4A1    |
| hsa-miR-130b-3p | PTPRG     |
| hsa-miR-130b-3p | RAP2C     |
| hsa-miR-130b-3p | RNF145    |
| hsa-miR-130b-3p | RPA2      |
| hsa-miR-130b-3p | RUNX3     |
| hsa-miR-130b-3p | SECISBP2L |
| hsa-miR-130b-3p | SEL1L3    |
| hsa-miR-130b-3p | SERINC3   |
| hsa-miR-130b-3p | SLAIN1    |
| hsa-miR-130b-3p | SLC35D1   |
| hsa-miR-130b-3p | SLC44A1   |
| hsa-miR-130b-3p | SLMAP     |
| hsa-miR-130b-3p | SPATA2    |
| hsa-miR-130b-3p | SPG20     |
| hsa-miR-130b-3p | SYBU      |
| hsa-miR-130b-3p | TGFBR2    |
| hsa-miR-130b-3p | THOP1     |
| hsa-miR-130b-3p | WEE1      |
| hsa-miR-130b-3p | ZBTB4     |
| hsa-miR-130b-3p | ZNF217    |
| hsa-miR-148a-3p | ACVR1     |
| hsa-miR-148a-3p | BTBD3     |
| hsa-miR-148a-3p | CDK19     |
| hsa-miR-148a-3p | DNMT1     |
| hsa-miR-148a-3p | GPATCH8   |
| hsa-miR-148a-3p | LBR       |
| hsa-miR-148a-3p | RAB34     |

|                 |           |
|-----------------|-----------|
| hsa-miR-148a-3p | RASSF8    |
| hsa-miR-148a-3p | RPS6KA5   |
| hsa-miR-148a-3p | SECISBP2L |
| hsa-miR-148a-3p | SESTD1    |
| hsa-miR-148a-3p | SNAPIN    |
| hsa-miR-148a-3p | TMED7     |
| hsa-miR-148a-3p | TMEM9B    |
| hsa-miR-148a-3p | TNRC6A    |
| hsa-miR-148b-3p | ABCB7     |
| hsa-miR-148b-3p | ARL8B     |
| hsa-miR-148b-3p | BTBD3     |
| hsa-miR-148b-3p | CUL5      |
| hsa-miR-148b-3p | CYB5R4    |
| hsa-miR-148b-3p | DCP2      |
| hsa-miR-148b-3p | DNMT1     |
| hsa-miR-148b-3p | ITGA5     |
| hsa-miR-148b-3p | ITSN2     |
| hsa-miR-148b-3p | KLF6      |
| hsa-miR-148b-3p | MARCH2    |
| hsa-miR-148b-3p | NPEPL1    |
| hsa-miR-148b-3p | OSBPL11   |
| hsa-miR-148b-3p | RTN4      |
| hsa-miR-148b-3p | SESTD1    |
| hsa-miR-148b-3p | SYNCRIP   |
| hsa-miR-148b-3p | TBL1XR1   |
| hsa-miR-148b-3p | USP33     |
| hsa-miR-148b-3p | USP48     |
| hsa-miR-148b-3p | VPS37A    |
| hsa-miR-155-5p  | ARID2     |
| hsa-miR-155-5p  | BACH1     |
| hsa-miR-155-5p  | CHAF1A    |

|                |          |
|----------------|----------|
| hsa-miR-155-5p | CREBRF   |
| hsa-miR-155-5p | ETS1     |
| hsa-miR-155-5p | FAM135A  |
| hsa-miR-155-5p | FAR1     |
| hsa-miR-155-5p | HIVEP2   |
| hsa-miR-155-5p | HNRNPA3  |
| hsa-miR-155-5p | IL17RB   |
| hsa-miR-155-5p | INTS6    |
| hsa-miR-155-5p | JARID2   |
| hsa-miR-155-5p | KBTBD2   |
| hsa-miR-155-5p | LCORL    |
| hsa-miR-155-5p | LRRC59   |
| hsa-miR-155-5p | MAP3K10  |
| hsa-miR-155-5p | MAP3K14  |
| hsa-miR-155-5p | PKN2     |
| hsa-miR-155-5p | RCN2     |
| hsa-miR-155-5p | TAB2     |
| hsa-miR-155-5p | TLE4     |
| hsa-miR-155-5p | TP53INP1 |
| hsa-miR-155-5p | TSHZ3    |
| hsa-miR-155-5p | WEE1     |
| hsa-miR-155-5p | ZNF236   |
| hsa-miR-155-5p | ZNF652   |
| hsa-miR-15b-5p | BTAF1    |
| hsa-miR-15b-5p | CCNE1    |
| hsa-miR-15b-5p | CHEK1    |
| hsa-miR-15b-5p | ETNK1    |
| hsa-miR-15b-5p | PLSCR4   |
| hsa-miR-15b-5p | PPIL1    |
| hsa-miR-15b-5p | RECK     |
| hsa-miR-15b-5p | SEPT2    |



|                |          |
|----------------|----------|
| hsa-miR-15b-5p | SERBP1   |
| hsa-miR-15b-5p | SMAD7    |
| hsa-miR-15b-5p | STXBP1   |
| hsa-miR-15b-5p | SYNJ1    |
| hsa-miR-15b-5p | TMC7     |
| hsa-miR-15b-5p | TMEM43   |
| hsa-miR-15b-5p | VEGFA    |
| hsa-miR-16-5p  | ABL2     |
| hsa-miR-16-5p  | AHCYL2   |
| hsa-miR-16-5p  | AKT3     |
| hsa-miR-16-5p  | ARHGDI1  |
| hsa-miR-16-5p  | ARL3     |
| hsa-miR-16-5p  | ASH1L    |
| hsa-miR-16-5p  | ATG14    |
| hsa-miR-16-5p  | ATP13A3  |
| hsa-miR-16-5p  | AXIN2    |
| hsa-miR-16-5p  | BTAF1    |
| hsa-miR-16-5p  | BTG2     |
| hsa-miR-16-5p  | BTRC     |
| hsa-miR-16-5p  | C16orf72 |
| hsa-miR-16-5p  | C1orf21  |
| hsa-miR-16-5p  | C2orf42  |
| hsa-miR-16-5p  | CAMSAP1  |
| hsa-miR-16-5p  | CAPRIN1  |
| hsa-miR-16-5p  | CAPZA2   |
| hsa-miR-16-5p  | CASK     |
| hsa-miR-16-5p  | CCNE1    |
| hsa-miR-16-5p  | CCNT2    |
| hsa-miR-16-5p  | CDC37L1  |
| hsa-miR-16-5p  | CDCA4    |
| hsa-miR-16-5p  | CDK17    |

|               |           |
|---------------|-----------|
| hsa-miR-16-5p | CPSF7     |
| hsa-miR-16-5p | CSDE1     |
| hsa-miR-16-5p | CYP26B1   |
| hsa-miR-16-5p | DDX3X     |
| hsa-miR-16-5p | DDX3Y     |
| hsa-miR-16-5p | DMTF1     |
| hsa-miR-16-5p | E2F7      |
| hsa-miR-16-5p | EIF4B     |
| hsa-miR-16-5p | FAM122B   |
| hsa-miR-16-5p | FBXW7     |
| hsa-miR-16-5p | FGF2      |
| hsa-miR-16-5p | GABARAPL1 |
| hsa-miR-16-5p | GATAD2A   |
| hsa-miR-16-5p | GLRX      |
| hsa-miR-16-5p | HELZ      |
| hsa-miR-16-5p | HERC6     |
| hsa-miR-16-5p | HSPA4L    |
| hsa-miR-16-5p | IFT74     |
| hsa-miR-16-5p | IPO7      |
| hsa-miR-16-5p | ITGA2     |
| hsa-miR-16-5p | IVNS1ABP  |
| hsa-miR-16-5p | JARID2    |
| hsa-miR-16-5p | KCNN4     |
| hsa-miR-16-5p | KDSR      |
| hsa-miR-16-5p | KIF23     |
| hsa-miR-16-5p | LAMC1     |
| hsa-miR-16-5p | LATS1     |
| hsa-miR-16-5p | LPHN1     |
| hsa-miR-16-5p | LUZP1     |
| hsa-miR-16-5p | LYRM5     |
| hsa-miR-16-5p | MAP7      |

|               |          |
|---------------|----------|
| hsa-miR-16-5p | MGAT4A   |
| hsa-miR-16-5p | MYO5A    |
| hsa-miR-16-5p | N4BP1    |
| hsa-miR-16-5p | NAPG     |
| hsa-miR-16-5p | NISCH    |
| hsa-miR-16-5p | NUP50    |
| hsa-miR-16-5p | OSBPL3   |
| hsa-miR-16-5p | PAFAH1B2 |
| hsa-miR-16-5p | PCMT1    |
| hsa-miR-16-5p | PDE3B    |
| hsa-miR-16-5p | PDIA6    |
| hsa-miR-16-5p | PDK4     |
| hsa-miR-16-5p | PDLIM5   |
| hsa-miR-16-5p | PHF19    |
| hsa-miR-16-5p | PHKA1    |
| hsa-miR-16-5p | PISD     |
| hsa-miR-16-5p | PLAG1    |
| hsa-miR-16-5p | PLSCR4   |
| hsa-miR-16-5p | PPM1D    |
| hsa-miR-16-5p | PPP1R11  |
| hsa-miR-16-5p | PRDM4    |
| hsa-miR-16-5p | PRKAR2A  |
| hsa-miR-16-5p | PSAT1    |
| hsa-miR-16-5p | PTPN3    |
| hsa-miR-16-5p | RAB9B    |
| hsa-miR-16-5p | RBM6     |
| hsa-miR-16-5p | RECK     |
| hsa-miR-16-5p | RFK      |
| hsa-miR-16-5p | RNF144B  |
| hsa-miR-16-5p | RNF217   |
| hsa-miR-16-5p | SALL1    |

|               |          |
|---------------|----------|
| hsa-miR-16-5p | SEH1L    |
| hsa-miR-16-5p | SERBP1   |
| hsa-miR-16-5p | SHOC2    |
| hsa-miR-16-5p | SIPA1L2  |
| hsa-miR-16-5p | SLC11A2  |
| hsa-miR-16-5p | SLC12A2  |
| hsa-miR-16-5p | SLC39A10 |
| hsa-miR-16-5p | SLC9A6   |
| hsa-miR-16-5p | SMAD7    |
| hsa-miR-16-5p | SNX16    |
| hsa-miR-16-5p | SOWAHC   |
| hsa-miR-16-5p | SPRED1   |
| hsa-miR-16-5p | SRPR     |
| hsa-miR-16-5p | STK33    |
| hsa-miR-16-5p | STXBP3   |
| hsa-miR-16-5p | SYNJ1    |
| hsa-miR-16-5p | SYPL1    |
| hsa-miR-16-5p | TBP      |
| hsa-miR-16-5p | TLE4     |
| hsa-miR-16-5p | TLK1     |
| hsa-miR-16-5p | TMEM100  |
| hsa-miR-16-5p | TMEM43   |
| hsa-miR-16-5p | TPPP3    |
| hsa-miR-16-5p | TUBA1A   |
| hsa-miR-16-5p | UBE2Q1   |
| hsa-miR-16-5p | UBE2V1   |
| hsa-miR-16-5p | UBE4A    |
| hsa-miR-16-5p | UBFD1    |
| hsa-miR-16-5p | UBN2     |
| hsa-miR-16-5p | USP42    |
| hsa-miR-16-5p | USP9X    |

|               |         |
|---------------|---------|
| hsa-miR-16-5p | VEGFA   |
| hsa-miR-16-5p | VPS4A   |
| hsa-miR-16-5p | WBP11   |
| hsa-miR-16-5p | WEE1    |
| hsa-miR-16-5p | WNT3A   |
| hsa-miR-16-5p | XPO7    |
| hsa-miR-16-5p | YTHDC1  |
| hsa-miR-16-5p | YWHAH   |
| hsa-miR-16-5p | ZBTB34  |
| hsa-miR-16-5p | ZNF622  |
| hsa-miR-16-5p | ZNRF3   |
| hsa-miR-17-5p | BMPR2   |
| hsa-miR-17-5p | E2F1    |
| hsa-miR-17-5p | ADARB1  |
| hsa-miR-17-5p | CCND1   |
| hsa-miR-17-5p | DCBLD2  |
| hsa-miR-17-5p | DNAJC27 |
| hsa-miR-17-5p | DPYSL2  |
| hsa-miR-17-5p | ENPP5   |
| hsa-miR-17-5p | FBXO31  |
| hsa-miR-17-5p | HBP1    |
| hsa-miR-17-5p | JAK1    |
| hsa-miR-17-5p | LAPTM4A |
| hsa-miR-17-5p | LCOR    |
| hsa-miR-17-5p | MAP3K12 |
| hsa-miR-17-5p | MAP3K9  |
| hsa-miR-17-5p | NAGK    |
| hsa-miR-17-5p | NAPEPLD |
| hsa-miR-17-5p | NCOA3   |
| hsa-miR-17-5p | NFAT5   |
| hsa-miR-17-5p | NPAS2   |

|                 |          |
|-----------------|----------|
| hsa-miR-17-5p   | PKD2     |
| hsa-miR-17-5p   | RAB5B    |
| hsa-miR-17-5p   | RB1      |
| hsa-miR-17-5p   | RBL2     |
| hsa-miR-17-5p   | RBM12B   |
| hsa-miR-17-5p   | SEPT2    |
| hsa-miR-17-5p   | STK11    |
| hsa-miR-17-5p   | TGFBR2   |
| hsa-miR-17-5p   | WEE1     |
| hsa-miR-17-5p   | ZFYVE26  |
| hsa-miR-17-5p   | ZNFX1    |
| hsa-miR-181a-5p | ANKRD13C |
| hsa-miR-181a-5p | ARF6     |
| hsa-miR-181a-5p | ATM      |
| hsa-miR-181a-5p | BTBD3    |
| hsa-miR-181a-5p | COPS2    |
| hsa-miR-181a-5p | DDX3X    |
| hsa-miR-181a-5p | EPHA5    |
| hsa-miR-181a-5p | FAM160A2 |
| hsa-miR-181a-5p | FBXO33   |
| hsa-miR-181a-5p | GPRIN3   |
| hsa-miR-181a-5p | KLF6     |
| hsa-miR-181a-5p | LCLAT1   |
| hsa-miR-181a-5p | LGALS1   |
| hsa-miR-181a-5p | MAP2K1   |
| hsa-miR-181a-5p | METAP1   |
| hsa-miR-181a-5p | MTMR12   |
| hsa-miR-181a-5p | NOTCH2   |
| hsa-miR-181a-5p | NR6A1    |
| hsa-miR-181a-5p | OTUD1    |
| hsa-miR-181a-5p | PLCL2    |

|                 |          |
|-----------------|----------|
| hsa-miR-181a-5p | PROX1    |
| hsa-miR-181a-5p | RLF      |
| hsa-miR-181a-5p | RNF34    |
| hsa-miR-181a-5p | SCD      |
| hsa-miR-181a-5p | SLC7A11  |
| hsa-miR-181a-5p | SRSF7    |
| hsa-miR-181a-5p | TM9SF3   |
| hsa-miR-181a-5p | TRIM2    |
| hsa-miR-181a-5p | ZFP36L2  |
| hsa-miR-181a-5p | ZNF594   |
| hsa-miR-186-5p  | CREBRF   |
| hsa-miR-186-5p  | FAM177A1 |
| hsa-miR-186-5p  | FNIP1    |
| hsa-miR-186-5p  | FOXN2    |
| hsa-miR-186-5p  | G2E3     |
| hsa-miR-186-5p  | HELZ     |
| hsa-miR-186-5p  | KIAA1462 |
| hsa-miR-186-5p  | KIF21A   |
| hsa-miR-186-5p  | NSD1     |
| hsa-miR-186-5p  | PAPD5    |
| hsa-miR-186-5p  | RBFOX2   |
| hsa-miR-186-5p  | RBM28    |
| hsa-miR-186-5p  | RNF2     |
| hsa-miR-186-5p  | STAG2    |
| hsa-miR-186-5p  | TARDBP   |
| hsa-miR-186-5p  | TMEM183A |
| hsa-miR-186-5p  | UBE2K    |
| hsa-miR-186-5p  | VPS13C   |
| hsa-miR-186-5p  | ZFP36L2  |
| hsa-miR-186-5p  | ZFP90    |
| hsa-miR-19b-3p  | ARHGAP12 |

|                |          |
|----------------|----------|
| hsa-miR-19b-3p | ATF2     |
| hsa-miR-19b-3p | ATXN7L1  |
| hsa-miR-19b-3p | BLCAP    |
| hsa-miR-19b-3p | BMPR2    |
| hsa-miR-19b-3p | C16orf70 |
| hsa-miR-19b-3p | CAMSAP1  |
| hsa-miR-19b-3p | CCND2    |
| hsa-miR-19b-3p | CCNL1    |
| hsa-miR-19b-3p | CEP350   |
| hsa-miR-19b-3p | CYP2U1   |
| hsa-miR-19b-3p | DDX6     |
| hsa-miR-19b-3p | DMXL2    |
| hsa-miR-19b-3p | E2F8     |
| hsa-miR-19b-3p | ELOVL5   |
| hsa-miR-19b-3p | ENPP5    |
| hsa-miR-19b-3p | FBXO8    |
| hsa-miR-19b-3p | HBP1     |
| hsa-miR-19b-3p | HIPK3    |
| hsa-miR-19b-3p | IMPDH1   |
| hsa-miR-19b-3p | KLF10    |
| hsa-miR-19b-3p | LONRF1   |
| hsa-miR-19b-3p | LRIG3    |
| hsa-miR-19b-3p | MB21D2   |
| hsa-miR-19b-3p | MPHOSPH9 |
| hsa-miR-19b-3p | NCKAP5   |
| hsa-miR-19b-3p | NR3C2    |
| hsa-miR-19b-3p | OTUD1    |
| hsa-miR-19b-3p | PATL1    |
| hsa-miR-19b-3p | PRUNE2   |
| hsa-miR-19b-3p | PSAP     |
| hsa-miR-19b-3p | PTEN     |



|                |           |
|----------------|-----------|
| hsa-miR-19b-3p | PTPRG     |
| hsa-miR-19b-3p | RAB21     |
| hsa-miR-19b-3p | RAP2C     |
| hsa-miR-19b-3p | RASSF2    |
| hsa-miR-19b-3p | RHEBL1    |
| hsa-miR-19b-3p | RNF11     |
| hsa-miR-19b-3p | RNF111    |
| hsa-miR-19b-3p | RNF145    |
| hsa-miR-19b-3p | SECISBP2L |
| hsa-miR-19b-3p | SEMA4C    |
| hsa-miR-19b-3p | SERINC3   |
| hsa-miR-19b-3p | SLC4A7    |
| hsa-miR-19b-3p | SMARCA2   |
| hsa-miR-19b-3p | SPATA2    |
| hsa-miR-19b-3p | SPG20     |
| hsa-miR-19b-3p | SYBU      |
| hsa-miR-19b-3p | TAF4      |
| hsa-miR-19b-3p | TMBIM6    |
| hsa-miR-19b-3p | TRIM33    |
| hsa-miR-19b-3p | VAMP3     |
| hsa-miR-19b-3p | WDR26     |
| hsa-miR-19b-3p | WEE1      |
| hsa-miR-19b-3p | ZBTB4     |
| hsa-miR-19b-3p | ZNF217    |
| hsa-miR-19b-3p | ZNF711    |
| hsa-miR-20a-5p | ARHGAP12  |
| hsa-miR-20a-5p | BMPR2     |
| hsa-miR-20a-5p | BNIP2     |
| hsa-miR-20a-5p | CEP120    |
| hsa-miR-20a-5p | E2F1      |
| hsa-miR-20a-5p | EGLN3     |

|                |          |
|----------------|----------|
| hsa-miR-20a-5p | HIF1A    |
| hsa-miR-20a-5p | KIAA1191 |
| hsa-miR-20a-5p | LYPD6    |
| hsa-miR-20a-5p | MAP3K12  |
| hsa-miR-20a-5p | NCOA3    |
| hsa-miR-20a-5p | NETO2    |
| hsa-miR-20a-5p | PLEKHM3  |
| hsa-miR-20a-5p | PPP6R3   |
| hsa-miR-20a-5p | RB1      |
| hsa-miR-20a-5p | RBL2     |
| hsa-miR-20a-5p | RBM12B   |
| hsa-miR-20a-5p | RUFY2    |
| hsa-miR-20a-5p | SEPT2    |
| hsa-miR-20a-5p | STAT3    |
| hsa-miR-20a-5p | TGFBR2   |
| hsa-miR-20a-5p | TSG101   |
| hsa-miR-20a-5p | UEVLD    |
| hsa-miR-20a-5p | ZNFX1    |
| hsa-miR-21-5p  | CPEB3    |
| hsa-miR-21-5p  | EDIL3    |
| hsa-miR-21-5p  | EPHA4    |
| hsa-miR-21-5p  | ESYT2    |
| hsa-miR-21-5p  | FAM46A   |
| hsa-miR-21-5p  | GLCCI1   |
| hsa-miR-21-5p  | GPR64    |
| hsa-miR-21-5p  | JAG1     |
| hsa-miR-21-5p  | JPH1     |
| hsa-miR-21-5p  | MAP3K1   |
| hsa-miR-21-5p  | MTPN     |
| hsa-miR-21-5p  | PAN3     |
| hsa-miR-21-5p  | PBRM1    |

|               |          |
|---------------|----------|
| hsa-miR-21-5p | PCBP1    |
| hsa-miR-21-5p | PELI1    |
| hsa-miR-21-5p | PGRMC2   |
| hsa-miR-21-5p | PLEKHA1  |
| hsa-miR-21-5p | RALGPS2  |
| hsa-miR-21-5p | SPRY2    |
| hsa-miR-21-5p | STAG2    |
| hsa-miR-21-5p | STAT3    |
| hsa-miR-21-5p | TGFBI    |
| hsa-miR-21-5p | TIAM1    |
| hsa-miR-21-5p | YOD1     |
| hsa-miR-21-5p | ZNF367   |
| hsa-miR-24-3p | ACVR1B   |
| hsa-miR-24-3p | BCL2L11  |
| hsa-miR-24-3p | CCDC58   |
| hsa-miR-24-3p | CMTM4    |
| hsa-miR-24-3p | DNAJB12  |
| hsa-miR-24-3p | KLHDC3   |
| hsa-miR-24-3p | LIMD1    |
| hsa-miR-24-3p | MAGI1    |
| hsa-miR-24-3p | MARCKSL1 |
| hsa-miR-24-3p | MATR3    |
| hsa-miR-24-3p | MBD6     |
| hsa-miR-24-3p | MLEC     |
| hsa-miR-24-3p | PER2     |
| hsa-miR-24-3p | PIM2     |
| hsa-miR-24-3p | PTPRF    |
| hsa-miR-24-3p | RNF2     |
| hsa-miR-24-3p | SCML2    |
| hsa-miR-24-3p | SESN1    |
| hsa-miR-24-3p | STRADB   |

|                |          |
|----------------|----------|
| hsa-miR-24-3p  | TMEM194A |
| hsa-miR-24-3p  | TMEM209  |
| hsa-miR-24-3p  | TOP1     |
| hsa-miR-24-3p  | VGLL3    |
| hsa-miR-24-3p  | ZNF217   |
| hsa-miR-26b-5p | ADM      |
| hsa-miR-26b-5p | CCDC28A  |
| hsa-miR-26b-5p | CREBZF   |
| hsa-miR-26b-5p | FAM136A  |
| hsa-miR-26b-5p | FAM98A   |
| hsa-miR-26b-5p | FBXO11   |
| hsa-miR-26b-5p | G3BP2    |
| hsa-miR-26b-5p | GNA13    |
| hsa-miR-26b-5p | HOXA9    |
| hsa-miR-26b-5p | PFKFB3   |
| hsa-miR-26b-5p | PITPNC1  |
| hsa-miR-26b-5p | PLOD2    |
| hsa-miR-26b-5p | POLR3G   |
| hsa-miR-26b-5p | PPP3R1   |
| hsa-miR-26b-5p | PTGS2    |
| hsa-miR-26b-5p | RCBTB1   |
| hsa-miR-26b-5p | RCN2     |
| hsa-miR-26b-5p | RFX7     |
| hsa-miR-26b-5p | RNF6     |
| hsa-miR-26b-5p | RTF1     |
| hsa-miR-26b-5p | SACS     |
| hsa-miR-26b-5p | SLC19A2  |
| hsa-miR-26b-5p | SLC7A11  |
| hsa-miR-26b-5p | SSH2     |
| hsa-miR-26b-5p | TMC7     |
| hsa-miR-26b-5p | USP3     |

|                |          |
|----------------|----------|
| hsa-miR-26b-5p | VANGL2   |
| hsa-miR-26b-5p | ZNF652   |
| hsa-miR-27a-3p | ABCA1    |
| hsa-miR-27a-3p | AFF4     |
| hsa-miR-27a-3p | DNAJC27  |
| hsa-miR-27a-3p | EGFR     |
| hsa-miR-27a-3p | FBXW7    |
| hsa-miR-27a-3p | FOXO1    |
| hsa-miR-27a-3p | GPAM     |
| hsa-miR-27a-3p | MIER3    |
| hsa-miR-27a-3p | MKNK2    |
| hsa-miR-27a-3p | NFE2L2   |
| hsa-miR-27a-3p | PDS5B    |
| hsa-miR-27a-3p | RMND5A   |
| hsa-miR-27a-3p | RNF182   |
| hsa-miR-27a-3p | RPS6KA5  |
| hsa-miR-27a-3p | SPRY2    |
| hsa-miR-27a-3p | THRB     |
| hsa-miR-27a-3p | TMEM170B |
| hsa-miR-27a-3p | USP25    |
| hsa-miR-27a-3p | ZNF800   |
| hsa-miR-29c-3p | AKT3     |
| hsa-miR-29c-3p | ANKRD13C |
| hsa-miR-29c-3p | BACH2    |
| hsa-miR-29c-3p | CEP68    |
| hsa-miR-29c-3p | COL15A1  |
| hsa-miR-29c-3p | COL3A1   |
| hsa-miR-29c-3p | COL4A1   |
| hsa-miR-29c-3p | COL4A2   |
| hsa-miR-29c-3p | COL7A1   |
| hsa-miR-29c-3p | DICER1   |

|                |          |
|----------------|----------|
| hsa-miR-29c-3p | DNMT3A   |
| hsa-miR-29c-3p | DNMT3B   |
| hsa-miR-29c-3p | FBN1     |
| hsa-miR-29c-3p | HMGCR    |
| hsa-miR-29c-3p | KLHL28   |
| hsa-miR-29c-3p | LAMC1    |
| hsa-miR-29c-3p | MYCN     |
| hsa-miR-29c-3p | PPP1R13B |
| hsa-miR-29c-3p | PURG     |
| hsa-miR-29c-3p | R3HDM4   |
| hsa-miR-29c-3p | RAB30    |
| hsa-miR-29c-3p | RNF19A   |
| hsa-miR-29c-3p | SPIN4    |
| hsa-miR-29c-3p | SUV420H2 |
| hsa-miR-29c-3p | TDG      |
| hsa-miR-29c-3p | TMTC3    |
| hsa-miR-29c-3p | VEGFA    |
| hsa-miR-29c-3p | ZBTB10   |
| hsa-miR-30a-5p | ABL1     |
| hsa-miR-30a-5p | BECN1    |
| hsa-miR-30a-5p | CARS     |
| hsa-miR-30a-5p | CHD1     |
| hsa-miR-30a-5p | CPNE8    |
| hsa-miR-30a-5p | CSNK1G1  |
| hsa-miR-30a-5p | DPY19L1  |
| hsa-miR-30a-5p | DSG2     |
| hsa-miR-30a-5p | ELMOD2   |
| hsa-miR-30a-5p | FAHD1    |
| hsa-miR-30a-5p | GALNT1   |
| hsa-miR-30a-5p | GALNT7   |
| hsa-miR-30a-5p | ITGA6    |

|                |          |
|----------------|----------|
| hsa-miR-30a-5p | KIF11    |
| hsa-miR-30a-5p | LCLAT1   |
| hsa-miR-30a-5p | LIMCH1   |
| hsa-miR-30a-5p | MAN1A2   |
| hsa-miR-30a-5p | MTDH     |
| hsa-miR-30a-5p | NDEL1    |
| hsa-miR-30a-5p | NT5E     |
| hsa-miR-30a-5p | P4HA2    |
| hsa-miR-30a-5p | PAFAH1B2 |
| hsa-miR-30a-5p | PICALM   |
| hsa-miR-30a-5p | PIK3CD   |
| hsa-miR-30a-5p | PPID     |
| hsa-miR-30a-5p | PPP1R12A |
| hsa-miR-30a-5p | PPP3R1   |
| hsa-miR-30a-5p | PRDM1    |
| hsa-miR-30a-5p | PTGFRN   |
| hsa-miR-30a-5p | PTP4A1   |
| hsa-miR-30a-5p | RAD23B   |
| hsa-miR-30a-5p | RPRD1A   |
| hsa-miR-30a-5p | RUNX2    |
| hsa-miR-30a-5p | SEC23A   |
| hsa-miR-30a-5p | SEC24A   |
| hsa-miR-30a-5p | SLC38A2  |
| hsa-miR-30a-5p | SLC4A7   |
| hsa-miR-30a-5p | SON      |
| hsa-miR-30a-5p | STX16    |
| hsa-miR-30a-5p | TMEM87A  |
| hsa-miR-30a-5p | TNRC6A   |
| hsa-miR-30a-5p | TWF1     |
| hsa-miR-30a-5p | XPO1     |
| hsa-miR-30a-5p | YWHAZ    |

|                |         |
|----------------|---------|
| hsa-miR-30b-5p | ATG12   |
| hsa-miR-30b-5p | B3GNT5  |
| hsa-miR-30b-5p | BDP1    |
| hsa-miR-30b-5p | CCNE2   |
| hsa-miR-30b-5p | CHD1    |
| hsa-miR-30b-5p | DDAH1   |
| hsa-miR-30b-5p | EML4    |
| hsa-miR-30b-5p | FRZB    |
| hsa-miR-30b-5p | GFPT2   |
| hsa-miR-30b-5p | GLCE    |
| hsa-miR-30b-5p | HIC2    |
| hsa-miR-30b-5p | KLF10   |
| hsa-miR-30b-5p | KLHL28  |
| hsa-miR-30b-5p | MIER3   |
| hsa-miR-30b-5p | OTUD4   |
| hsa-miR-30b-5p | PIP4K2A |
| hsa-miR-30b-5p | RFX7    |
| hsa-miR-30b-5p | RUNX2   |
| hsa-miR-30b-5p | SH2B3   |
| hsa-miR-30b-5p | TAOK1   |
| hsa-miR-30b-5p | ZDHHC17 |
| hsa-miR-30c-5p | B3GNT5  |
| hsa-miR-30c-5p | CAPZA1  |
| hsa-miR-30c-5p | CCDC117 |
| hsa-miR-30c-5p | CELSR3  |
| hsa-miR-30c-5p | CHD1    |
| hsa-miR-30c-5p | DPYSL2  |
| hsa-miR-30c-5p | EED     |
| hsa-miR-30c-5p | MTDH    |
| hsa-miR-30c-5p | NEDD4   |
| hsa-miR-30c-5p | PNKD    |



|                |          |
|----------------|----------|
| hsa-miR-30c-5p | PPP1R12A |
| hsa-miR-30c-5p | RASA1    |
| hsa-miR-30c-5p | SOCS3    |
| hsa-miR-30c-5p | TNRC6A   |
| hsa-miR-30c-5p | TWF1     |
| hsa-miR-30c-5p | UBE2I    |
| hsa-miR-30c-5p | USP37    |
| hsa-miR-32-5p  | APPL1    |
| hsa-miR-32-5p  | BCL11A   |
| hsa-miR-32-5p  | BCL11B   |
| hsa-miR-32-5p  | BCL2L11  |
| hsa-miR-32-5p  | CNEP1R1  |
| hsa-miR-32-5p  | DNAJB9   |
| hsa-miR-32-5p  | DOCK9    |
| hsa-miR-32-5p  | EDEM1    |
| hsa-miR-32-5p  | ERGIC2   |
| hsa-miR-32-5p  | FOXN2    |
| hsa-miR-32-5p  | GFPT2    |
| hsa-miR-32-5p  | GOLGA3   |
| hsa-miR-32-5p  | GOLGA8A  |
| hsa-miR-32-5p  | GPBP1L1  |
| hsa-miR-32-5p  | HIVEP1   |
| hsa-miR-32-5p  | ITGA6    |
| hsa-miR-32-5p  | ITGAV    |
| hsa-miR-32-5p  | ITPR1    |
| hsa-miR-32-5p  | KAT2B    |
| hsa-miR-32-5p  | LHFPL2   |
| hsa-miR-32-5p  | MED19    |
| hsa-miR-32-5p  | MFF      |
| hsa-miR-32-5p  | MORC3    |
| hsa-miR-32-5p  | MTF1     |

|                |          |
|----------------|----------|
| hsa-miR-32-5p  | MYO5A    |
| hsa-miR-32-5p  | NEFL     |
| hsa-miR-32-5p  | PAPD7    |
| hsa-miR-32-5p  | PHLPP2   |
| hsa-miR-32-5p  | PLEKHA1  |
| hsa-miR-32-5p  | PPCS     |
| hsa-miR-32-5p  | RGS17    |
| hsa-miR-32-5p  | RHPN2    |
| hsa-miR-32-5p  | SLC25A32 |
| hsa-miR-32-5p  | SLX4     |
| hsa-miR-32-5p  | SPRYD4   |
| hsa-miR-32-5p  | SSFA2    |
| hsa-miR-32-5p  | SUV420H1 |
| hsa-miR-32-5p  | SYNJ1    |
| hsa-miR-32-5p  | TMF1     |
| hsa-miR-32-5p  | TRIO     |
| hsa-miR-32-5p  | TULP4    |
| hsa-miR-32-5p  | UBE2Z    |
| hsa-miR-32-5p  | UGP2     |
| hsa-miR-32-5p  | ZFC3H1   |
| hsa-miR-34a-5p | ACSL4    |
| hsa-miR-34a-5p | ARHGAP1  |
| hsa-miR-34a-5p | BCL2L13  |
| hsa-miR-34a-5p | CAMTA1   |
| hsa-miR-34a-5p | CCL22    |
| hsa-miR-34a-5p | CCNE2    |
| hsa-miR-34a-5p | DLL1     |
| hsa-miR-34a-5p | E2F5     |
| hsa-miR-34a-5p | FOXP1    |
| hsa-miR-34a-5p | LDHA     |
| hsa-miR-34a-5p | LEF1     |

|                |         |
|----------------|---------|
| hsa-miR-34a-5p | MDM4    |
| hsa-miR-34a-5p | MET     |
| hsa-miR-34a-5p | NOTCH1  |
| hsa-miR-34a-5p | PDGFRA  |
| hsa-miR-34a-5p | PEA15   |
| hsa-miR-34a-5p | POGZ    |
| hsa-miR-34a-5p | PPP1R10 |
| hsa-miR-34a-5p | RRAS    |
| hsa-miR-34a-5p | SATB2   |
| hsa-miR-34a-5p | SGPP1   |
| hsa-miR-34a-5p | SLC4A7  |
| hsa-miR-34a-5p | SYT1    |
| hsa-miR-34a-5p | TNRC18  |
| hsa-miR-34a-5p | TPPP    |
| hsa-miR-34a-5p | UBP1    |
| hsa-miR-34a-5p | VAMP2   |
| hsa-miR-34a-5p | ZNF644  |
| hsa-miR-7-5p   | ARF4    |
| hsa-miR-7-5p   | C5orf22 |
| hsa-miR-7-5p   | CALU    |
| hsa-miR-7-5p   | CHAMP1  |
| hsa-miR-7-5p   | CKAP4   |
| hsa-miR-7-5p   | CNN3    |
| hsa-miR-7-5p   | CNOT8   |
| hsa-miR-7-5p   | COLEC12 |
| hsa-miR-7-5p   | ERI2    |
| hsa-miR-7-5p   | FNDC4   |
| hsa-miR-7-5p   | HELLS   |
| hsa-miR-7-5p   | IDE     |
| hsa-miR-7-5p   | IRS2    |
| hsa-miR-7-5p   | LRRRC59 |

|                |           |
|----------------|-----------|
| hsa-miR-7-5p   | LYPD3     |
| hsa-miR-7-5p   | NXT2      |
| hsa-miR-7-5p   | PLEC      |
| hsa-miR-7-5p   | POLE4     |
| hsa-miR-7-5p   | PPIF      |
| hsa-miR-7-5p   | PSME3     |
| hsa-miR-7-5p   | RAB11FIP5 |
| hsa-miR-7-5p   | RAF1      |
| hsa-miR-7-5p   | RELA      |
| hsa-miR-7-5p   | RRAS2     |
| hsa-miR-7-5p   | SLC6A9    |
| hsa-miR-7-5p   | SMARCD1   |
| hsa-miR-7-5p   | SNCA      |
| hsa-miR-7-5p   | SPATA2    |
| hsa-miR-7-5p   | UBQLN4    |
| hsa-miR-7-5p   | VPS26A    |
| hsa-miR-92a-3p | AIDA      |
| hsa-miR-92a-3p | ARID1B    |
| hsa-miR-92a-3p | DMXL1     |
| hsa-miR-92a-3p | ERGIC2    |
| hsa-miR-92a-3p | FAM135A   |
| hsa-miR-92a-3p | FAM20C    |
| hsa-miR-92a-3p | FNDC3B    |
| hsa-miR-92a-3p | FNIP1     |
| hsa-miR-92a-3p | G3BP2     |
| hsa-miR-92a-3p | GOLGA3    |
| hsa-miR-92a-3p | HIPK3     |
| hsa-miR-92a-3p | ITGA5     |
| hsa-miR-92a-3p | KAT2B     |
| hsa-miR-92a-3p | MAP1B     |
| hsa-miR-92a-3p | PCMTD1    |

|                |          |
|----------------|----------|
| hsa-miR-92a-3p | PDS5B    |
| hsa-miR-92a-3p | PKDCC    |
| hsa-miR-92a-3p | SERTAD3  |
| hsa-miR-92a-3p | SRPR     |
| hsa-miR-92a-3p | SYNJ1    |
| hsa-miR-92a-3p | TECPR2   |
| hsa-miR-92a-3p | TET2     |
| hsa-miR-92a-3p | TMF1     |
| hsa-miR-92a-3p | WASL     |
| hsa-miR-93-5p  | ADARB1   |
| hsa-miR-93-5p  | ANKRD29  |
| hsa-miR-93-5p  | ANKRD52  |
| hsa-miR-93-5p  | APBB2    |
| hsa-miR-93-5p  | ARHGAP1  |
| hsa-miR-93-5p  | ARHGAP12 |
| hsa-miR-93-5p  | ARID4B   |
| hsa-miR-93-5p  | ASF1A    |
| hsa-miR-93-5p  | BMPR2    |
| hsa-miR-93-5p  | BNIP2    |
| hsa-miR-93-5p  | BTBD10   |
| hsa-miR-93-5p  | BTG3     |
| hsa-miR-93-5p  | CCNG2    |
| hsa-miR-93-5p  | CNOT4    |
| hsa-miR-93-5p  | CRY2     |
| hsa-miR-93-5p  | DUSP8    |
| hsa-miR-93-5p  | E2F1     |
| hsa-miR-93-5p  | EGLN3    |
| hsa-miR-93-5p  | EPHA4    |
| hsa-miR-93-5p  | EZH1     |
| hsa-miR-93-5p  | F3       |
| hsa-miR-93-5p  | FAM129A  |

|               |          |
|---------------|----------|
| hsa-miR-93-5p | FBXL5    |
| hsa-miR-93-5p | FCHO2    |
| hsa-miR-93-5p | FEM1C    |
| hsa-miR-93-5p | FYCO1    |
| hsa-miR-93-5p | GPATCH2  |
| hsa-miR-93-5p | GPR137C  |
| hsa-miR-93-5p | HAUS8    |
| hsa-miR-93-5p | HEG1     |
| hsa-miR-93-5p | IRF1     |
| hsa-miR-93-5p | KAT2B    |
| hsa-miR-93-5p | KATNAL1  |
| hsa-miR-93-5p | KIAA1191 |
| hsa-miR-93-5p | KLF11    |
| hsa-miR-93-5p | KLHL28   |
| hsa-miR-93-5p | KPNA2    |
| hsa-miR-93-5p | LDLR     |
| hsa-miR-93-5p | LIMA1    |
| hsa-miR-93-5p | LYST     |
| hsa-miR-93-5p | MAPRE3   |
| hsa-miR-93-5p | MED12L   |
| hsa-miR-93-5p | MFN2     |
| hsa-miR-93-5p | MIDN     |
| hsa-miR-93-5p | NAA30    |
| hsa-miR-93-5p | NIN      |
| hsa-miR-93-5p | OSR1     |
| hsa-miR-93-5p | PAPOLA   |
| hsa-miR-93-5p | PBX3     |
| hsa-miR-93-5p | PDE3B    |
| hsa-miR-93-5p | PDZD11   |
| hsa-miR-93-5p | PGM2L1   |
| hsa-miR-93-5p | PKD2     |

|               |           |
|---------------|-----------|
| hsa-miR-93-5p | PRRG1     |
| hsa-miR-93-5p | PTPN4     |
| hsa-miR-93-5p | RAB11FIP1 |
| hsa-miR-93-5p | RAB5B     |
| hsa-miR-93-5p | RB1       |
| hsa-miR-93-5p | REEP3     |
| hsa-miR-93-5p | RPS6KA5   |
| hsa-miR-93-5p | SERTAD2   |
| hsa-miR-93-5p | SGMS1     |
| hsa-miR-93-5p | SH3PXD2A  |
| hsa-miR-93-5p | SPOPL     |
| hsa-miR-93-5p | STAT3     |
| hsa-miR-93-5p | STK11     |
| hsa-miR-93-5p | TBC1D20   |
| hsa-miR-93-5p | TGFBR2    |
| hsa-miR-93-5p | TMEM127   |
| hsa-miR-93-5p | TMEM168   |
| hsa-miR-93-5p | TNFRSF21  |
| hsa-miR-93-5p | TNKS1BP1  |
| hsa-miR-93-5p | TRIP10    |
| hsa-miR-93-5p | TSG101    |
| hsa-miR-93-5p | UBXN2A    |
| hsa-miR-93-5p | VLDLR     |
| hsa-miR-93-5p | ZC3H12C   |
| hsa-miR-93-5p | ZNF148    |
| hsa-miR-93-5p | ZNFX1     |
| hsa-miR-9-5p  | CAPZA1    |
| hsa-miR-9-5p  | CCNG1     |
| hsa-miR-9-5p  | FAM46A    |
| hsa-miR-9-5p  | KLF5      |
| hsa-miR-9-5p  | LDLRAP1   |

|               |          |
|---------------|----------|
| hsa-miR-9-5p  | MAP3K3   |
| hsa-miR-9-5p  | MESDC1   |
| hsa-miR-9-5p  | NFATC3   |
| hsa-miR-9-5p  | ONECUT2  |
| hsa-miR-9-5p  | PRDM1    |
| hsa-miR-9-5p  | PXDN     |
| hsa-miR-9-5p  | RAB34    |
| hsa-miR-9-5p  | SIRT1    |
| hsa-miR-9-5p  | SNX7     |
| hsa-miR-9-5p  | SOCS5    |
| hsa-miR-9-5p  | STK3     |
| hsa-miR-9-5p  | SYAP1    |
| hsa-miR-9-5p  | TGFBI    |
| hsa-miR-9-5p  | ZBED3    |
| hsa-miR-98-5p | ARHGAP28 |
| hsa-miR-98-5p | CCNJ     |
| hsa-miR-98-5p | CHD4     |
| hsa-miR-98-5p | CLP1     |
| hsa-miR-98-5p | COIL     |
| hsa-miR-98-5p | CPA4     |
| hsa-miR-98-5p | E2F6     |
| hsa-miR-98-5p | FNDC3A   |
| hsa-miR-98-5p | FZD3     |
| hsa-miR-98-5p | GNG5     |
| hsa-miR-98-5p | GNPTAB   |
| hsa-miR-98-5p | HMGA1    |
| hsa-miR-98-5p | HMGA2    |
| hsa-miR-98-5p | NME6     |
| hsa-miR-98-5p | NRAS     |
| hsa-miR-98-5p | PGRMC1   |
| hsa-miR-98-5p | PLAGL2   |



|               |         |
|---------------|---------|
| hsa-miR-98-5p | RGS16   |
| hsa-miR-98-5p | SLC20A1 |
| hsa-miR-98-5p | SLC5A6  |
| hsa-miR-98-5p | TARBP2  |
| hsa-miR-98-5p | TGFBR1  |
| hsa-miR-98-5p | TMEM2   |
| hsa-miR-98-5p | TTLL4   |
| hsa-miR-98-5p | YOD1    |
