# Supplementary material
Source: PubMed Central journal article supplement (PMC8687357)
Supplement: SYB2-10-219-s004.pdf [file SYB2-10-219-s004.pdf]

**Table S2:** Comparative analysis of transcriptional regulatory networks

|                              | Context-specific networks    |                              | Generic networks              |            |
|------------------------------|------------------------------|------------------------------|-------------------------------|------------|
|                              | Yu et al., 2012 <sup>a</sup> | Le et al., 2013 <sup>b</sup> | Liu et al., 2015 <sup>c</sup> | This study |
| # of regulatory elements     |                              |                              |                               |            |
| miRNAs                       | 159                          | 27                           | 232                           | 345        |
| TFs                          | 81                           | 52                           | 243                           | 284        |
| miRNAs+TFs                   | 240                          | 79                           | 475                           | 629        |
| target genes                 | 3178                         | 834                          | 3559                          | 4624       |
| # of regulatory interactions |                              |                              |                               |            |
| miRNA-gene                   | 1625                         | 1822                         | 1426                          | 1881       |
| TF-gene                      | 3413                         | 724                          | 6727                          | 6071       |
| TF-miRNA                     | 98                           | 118                          | 492                           | 670        |
| Performance metrics          |                              |                              |                               |            |
| Sensitivity                  | 0.02                         | 0.01                         | 0.64                          | 0.67       |
| Specificity                  | 0.99                         | 0.99                         | 0.98                          | 0.95       |
| F1 score                     | 0.04                         | 0.02                         | 0.77                          | 0.78       |

<sup>a</sup> A combinatorial network of transcriptional regulation and microRNA regulation in human cancer

<sup>b</sup> A three-component transcriptional regulation network reconstructed using heterogeneous data representing epithelial-to-mesenchymal transition in cancer

<sup>c</sup> A generic network, which was constructed using data in RegNetwork database using data from three independent resources: TF-gene interactions from TRED, miRNA-TF interactions from TransMir, and miRNA-gene interactions from miRecords databases
