# Supplementary material
Source: PubMed Central journal article supplement (PMC8687357)
Supplement: SYB2-10-219-s005.pdf [file SYB2-10-219-s005.pdf]

**Table S4:** Interactions between hub TFs and miRNA-targeted genes in the generic network (as represented in Figure 1B)

| Hub TF Gene | Target Gene | Hub TF | Degree (i.e., number of targeted genes) |
|-------------|-------------|--------|-----------------------------------------|
| HIF1A       | BRINP1      | HIF1A  | 369                                     |
| HIF1A       | LEKR1       | TP53   | 266                                     |
| HIF1A       | BNIP3L      | FOS    | 213                                     |
| HIF1A       | RPL7AP33    | RUNX1  | 191                                     |
| HIF1A       | BCL7A       | EGR1   | 191                                     |
| HIF1A       | ATG9A       | SOX2   | 149                                     |
| HIF1A       | ARHGAP5     | ETS1   | 141                                     |
| HIF1A       | ATXN7L1     | CTCF   | 117                                     |
| HIF1A       | AGGF1       | GATA3  | 110                                     |
| HIF1A       | ASPH        | ESR2   | 106                                     |
| HIF1A       | ATP5G1P8    | MITF   | 97                                      |
| HIF1A       | ACTR1B      | CEBPA  | 88                                      |
| HIF1A       | ADAMTS9     | SP1    | 45                                      |
| HIF1A       | ANKRD37     | RXRA   | 37                                      |
| HIF1A       | AZIN1       | SPI1   | 30                                      |
| HIF1A       | ANKZF1      | HNF1A  | 15                                      |
| HIF1A       | ABHD17C     | REST   | 9                                       |
| HIF1A       | ACTL7B      |        |                                         |
| HIF1A       | ADPRHL2     |        |                                         |
| HIF1A       | AK2         |        |                                         |
| HIF1A       | ANXA4       |        |                                         |
| HIF1A       | ARFGEF2     |        |                                         |
| HIF1A       | ARID1B      |        |                                         |
| HIF1A       | ARL4A       |        |                                         |
| HIF1A       | ARL6        |        |                                         |
| HIF1A       | ARRDC3      |        |                                         |
| HIF1A       | ATP6V1G3    |        |                                         |
| HIF1A       | ATPIF1      |        |                                         |
| HIF1A       | ATXN7       |        |                                         |
| HIF1A       | B4GALT5     |        |                                         |

|       |          |
|-------|----------|
| HIF1A | BHLHE40  |
| HIF1A | C2orf47  |
| HIF1A | C3orf10  |
| HIF1A | C4orf3   |
| HIF1A | C4orf47  |
| HIF1A | C9orf156 |
| HIF1A | CA9      |
| HIF1A | CACNA1A  |
| HIF1A | CCL5     |
| HIF1A | CCNG2    |
| HIF1A | CCNT1    |
| HIF1A | CCRN4L   |
| HIF1A | CDH13    |
| HIF1A | CDH23    |
| HIF1A | CDK7     |
| HIF1A | CGGBP1   |
| HIF1A | CHCHD6   |
| HIF1A | CHD1L    |
| HIF1A | CHD8     |
| HIF1A | CIART    |
| HIF1A | CLEC4C   |
| HIF1A | CLIP2    |
| HIF1A | CP       |
| HIF1A | CRISPLD2 |
| HIF1A | CRYBA2   |
| HIF1A | CTF2P    |
| HIF1A | CYCS     |
| HIF1A | DARS     |
| HIF1A | DAZL     |
| HIF1A | DDX18    |
| HIF1A | DDX41    |
| HIF1A | DENND1A  |
| HIF1A | DGAT2    |

|       |         |
|-------|---------|
| HIF1A | DHX57   |
| HIF1A | DMXL1   |
| HIF1A | DNAJB2  |
| HIF1A | DNAJB9  |
| HIF1A | DNM1L   |
| HIF1A | DPP6    |
| HIF1A | DPYSL2  |
| HIF1A | DSCAM   |
| HIF1A | DTWD2   |
| HIF1A | ECE2    |
| HIF1A | EFCAB1  |
| HIF1A | EFCAB3  |
| HIF1A | EFNB3   |
| HIF1A | EGFR    |
| HIF1A | ENKUR   |
| HIF1A | ENO1    |
| HIF1A | ENTPD4  |
| HIF1A | EPHB6   |
| HIF1A | ERRFI1  |
| HIF1A | ETAA1   |
| HIF1A | FAM129B |
| HIF1A | FAM131C |
| HIF1A | FAM134C |
| HIF1A | FAM13A  |
| HIF1A | FAM162A |
| HIF1A | FAM174A |
| HIF1A | FAM219A |
| HIF1A | FAM65C  |
| HIF1A | FANCD2  |
| HIF1A | FASTKD2 |
| HIF1A | FBXO16  |
| HIF1A | FKBP15  |
| HIF1A | FNIP1   |

|       |          |
|-------|----------|
| HIF1A | FTH1     |
| HIF1A | FUT8     |
| HIF1A | FZD3     |
| HIF1A | GABRR1   |
| HIF1A | GBE1     |
| HIF1A | GID4     |
| HIF1A | GMCL1    |
| HIF1A | GOLGA1   |
| HIF1A | GPATCH11 |
| HIF1A | GPHA2    |
| HIF1A | GPHN     |
| HIF1A | GPR21    |
| HIF1A | GPR61    |
| HIF1A | GPRIN3   |
| HIF1A | GRB10    |
| HIF1A | GRPEL1   |
| HIF1A | GSTA7P   |
| HIF1A | GTF3C4   |
| HIF1A | HAT1     |
| HIF1A | HCG4     |
| HIF1A | HMGA1P6  |
| HIF1A | HMGCL    |
| HIF1A | HMMR     |
| HIF1A | HNRNPK   |
| HIF1A | HPS3     |
| HIF1A | HPS5     |
| HIF1A | HSPA9    |
| HIF1A | IL12A    |
| HIF1A | IMMT     |
| HIF1A | ING2     |
| HIF1A | INHA     |
| HIF1A | INHBA    |
| HIF1A | INSIG1   |

|       |              |
|-------|--------------|
| HIF1A | INSIG2       |
| HIF1A | IP6K1        |
| HIF1A | JUN          |
| HIF1A | JUND         |
| HIF1A | KCNE4        |
| HIF1A | KCNH5        |
| HIF1A | KCNJ2        |
| HIF1A | KDM3A        |
| HIF1A | KDM4C        |
| HIF1A | KDM5B        |
| HIF1A | KIAA0922     |
| HIF1A | KIAA1715     |
| HIF1A | KIAA2013     |
| HIF1A | KLF2         |
| HIF1A | KLHL11       |
| HIF1A | KLHL25       |
| HIF1A | KLHL31       |
| HIF1A | KLRB1        |
| HIF1A | KMT2E        |
| HIF1A | KRCC1        |
| HIF1A | LARGE        |
| HIF1A | LGALS8       |
| HIF1A | LHFPL3       |
| HIF1A | LINC01550    |
| HIF1A | LMBR1        |
| HIF1A | LMLN         |
| HIF1A | LOC100507353 |
| HIF1A | LOC102724664 |
| HIF1A | LOX          |
| HIF1A | LOXL3        |
| HIF1A | LRP4         |
| HIF1A | LRRC4        |
| HIF1A | LRRC56       |

|       |          |
|-------|----------|
| HIF1A | MAGI3    |
| HIF1A | MAML1    |
| HIF1A | MAP1LC3A |
| HIF1A | MAP2K5   |
| HIF1A | MAPKAP1  |
| HIF1A | MARCKS   |
| HIF1A | MDH1     |
| HIF1A | MICALL2  |
| HIF1A | MICU1    |
| HIF1A | MIR1204  |
| HIF1A | MIR181A1 |
| HIF1A | MIR30D   |
| HIF1A | MKL2     |
| HIF1A | MON1B    |
| HIF1A | MSANTD3  |
| HIF1A | NAA30    |
| HIF1A | NAV1     |
| HIF1A | NBAS     |
| HIF1A | NCKAP5   |
| HIF1A | NCOA7    |
| HIF1A | NDC1     |
| HIF1A | NDRG1    |
| HIF1A | NDUFC1   |
| HIF1A | NEGR1    |
| HIF1A | NGLY1    |
| HIF1A | NMNAT1   |
| HIF1A | NOP58    |
| HIF1A | NOS1     |
| HIF1A | NREP     |
| HIF1A | NRN1     |
| HIF1A | NUDT13   |
| HIF1A | NUMB     |
| HIF1A | NUP210   |

|       |         |
|-------|---------|
| HIF1A | NVL     |
| HIF1A | OR2K2   |
| HIF1A | OR7A10  |
| HIF1A | OXSR1   |
| HIF1A | PAIP2   |
| HIF1A | PAPPA2  |
| HIF1A | PCBP1   |
| HIF1A | PCMTD1  |
| HIF1A | PDE12   |
| HIF1A | PDE2A   |
| HIF1A | PDE4D   |
| HIF1A | PDE5A   |
| HIF1A | PDLIM2  |
| HIF1A | PEBP4   |
| HIF1A | PEX3    |
| HIF1A | PFKFB3  |
| HIF1A | PFKFB4  |
| HIF1A | PHPT1   |
| HIF1A | PJA2    |
| HIF1A | PKD2L1  |
| HIF1A | PKIA    |
| HIF1A | PLEKHA8 |
| HIF1A | PLEKHG6 |
| HIF1A | PLOD2   |
| HIF1A | PNISR   |
| HIF1A | PNPLA8  |
| HIF1A | PNRC1   |
| HIF1A | POLR2H  |
| HIF1A | POU2F1  |
| HIF1A | PPID    |
| HIF1A | PPP1R3C |
| HIF1A | PPP2R5E |
| HIF1A | PPP6R3  |

|       |           |
|-------|-----------|
| HIF1A | PRDM1     |
| HIF1A | PRELID2   |
| HIF1A | PRKAB2    |
| HIF1A | PRKCCQ    |
| HIF1A | PTGIS     |
| HIF1A | PTPRC     |
| HIF1A | PVT1      |
| HIF1A | PXDN      |
| HIF1A | RAB17     |
| HIF1A | RABGAP1   |
| HIF1A | RAD23B    |
| HIF1A | RAD51B    |
| HIF1A | RANP6     |
| HIF1A | RAP2B     |
| HIF1A | RASSF1    |
| HIF1A | RBFOX2    |
| HIF1A | RBM8A     |
| HIF1A | RELL1     |
| HIF1A | RERE      |
| HIF1A | RGS6      |
| HIF1A | RGS7      |
| HIF1A | RHOBTB3   |
| HIF1A | RIOK1     |
| HIF1A | RLF       |
| HIF1A | RN7SKP224 |
| HIF1A | RN7SKP43  |
| HIF1A | RNA5SP360 |
| HIF1A | RNA5SP401 |
| HIF1A | RNase_MRP |
| HIF1A | RNF145    |
| HIF1A | RNF181    |
| HIF1A | RNF187    |
| HIF1A | RNU2-8P   |



|       |            |
|-------|------------|
| HIF1A | RNU4-90P   |
| HIF1A | RNU6       |
| HIF1A | RNU6-1066P |
| HIF1A | RNU6-428P  |
| HIF1A | RNU6-481P  |
| HIF1A | RNU6-699P  |
| HIF1A | RNU6-745P  |
| HIF1A | RNU6-778P  |
| HIF1A | RNU7-126P  |
| HIF1A | RQCD1      |
| HIF1A | RRAGA      |
| HIF1A | RRM2       |
| HIF1A | RRP12      |
| HIF1A | RSBN1      |
| HIF1A | RTN1       |
| HIF1A | SAFB2      |
| HIF1A | SAP30      |
| HIF1A | SBF2       |
| HIF1A | SCRN1      |
| HIF1A | SEC61G     |
| HIF1A | SEPT7      |
| HIF1A | SEPT9      |
| HIF1A | SERPINE1   |
| HIF1A | SEZ6L2     |
| HIF1A | SHANK2     |
| HIF1A | SKIDA1     |
| HIF1A | SLC11A2    |
| HIF1A | SLC25A32   |
| HIF1A | SLC2A1     |
| HIF1A | SLC2A5     |
| HIF1A | SLC35A4    |
| HIF1A | SLC35B4    |
| HIF1A | SLC35C2    |

|       |          |
|-------|----------|
| HIF1A | SLC4A4   |
| HIF1A | SMAP2    |
| HIF1A | SMC2     |
| HIF1A | SMEK2    |
| HIF1A | SMG9     |
| HIF1A | SNAPC3   |
| HIF1A | SND1     |
| HIF1A | SNORD38B |
| HIF1A | snoU109  |
| HIF1A | snoU13   |
| HIF1A | SOCS6    |
| HIF1A | SORBS2   |
| HIF1A | SOS1     |
| HIF1A | SPICE1   |
| HIF1A | SPRY1    |
| HIF1A | SPTBN1   |
| HIF1A | ST3GAL1  |
| HIF1A | STAMBP   |
| HIF1A | STBD1    |
| HIF1A | STC1     |
| HIF1A | STC2     |
| HIF1A | SUMF1    |
| HIF1A | SYT6     |
| HIF1A | TARS     |
| HIF1A | THBS2    |
| HIF1A | TICAM2   |
| HIF1A | TIMM13   |
| HIF1A | TLDC1    |
| HIF1A | TLE4     |
| HIF1A | TMEM144  |
| HIF1A | TMEM18   |
| HIF1A | TMEM45A  |
| HIF1A | TMPRSS3  |

|       |           |
|-------|-----------|
| HIF1A | TNFRSF10D |
| HIF1A | TNS3      |
| HIF1A | TOMM34    |
| HIF1A | TPD52     |
| HIF1A | TPR       |
| HIF1A | TPRXL     |
| HIF1A | TRIT1     |
| HIF1A | TRPM4     |
| HIF1A | TSPAN5    |
| HIF1A | TSTD2     |
| HIF1A | TLL11     |
| HIF1A | U3        |
| HIF1A | UBA5      |
| HIF1A | UBA6      |
| HIF1A | UGP2      |
| HIF1A | ULK2      |
| HIF1A | UNC5D     |
| HIF1A | URM1      |
| HIF1A | USO1      |
| HIF1A | UTRN      |
| HIF1A | VDAC1     |
| HIF1A | VEGFA     |
| HIF1A | VGLL4     |
| HIF1A | VPS45     |
| HIF1A | WDR27     |
| HIF1A | WDR36     |
| HIF1A | WDR54     |
| HIF1A | WNT2B     |
| HIF1A | XXYLT1    |
| HIF1A | Y_RNA     |
| HIF1A | Y_RNA     |
| HIF1A | YWHAG     |
| HIF1A | ZBTB10    |

|       |            |
|-------|------------|
| HIF1A | ZDBF2      |
| HIF1A | ZFAT       |
| HIF1A | ZNF131     |
| HIF1A | ZNF148     |
| HIF1A | ZNF2       |
| HIF1A | ZNF292     |
| HIF1A | ZNF398     |
| HIF1A | ZNHIT1     |
| HIF1A | ZRANB3     |
| TP53  | BAX        |
| TP53  | C4BPAP2    |
| TP53  | ARHGEF19   |
| TP53  | BTG2       |
| TP53  | AJAP1      |
| TP53  | RNU6-1211P |
| TP53  | ATF3       |
| TP53  | ADGRL2     |
| TP53  | CAPZA1     |
| TP53  | AC098935.2 |
| TP53  | ADGRB2     |
| TP53  | AL592307.1 |
| TP53  | AL583842.5 |
| TP53  | AJAP1      |
| TP53  | FDPSP1     |
| TP53  | RNU6-965P  |
| TP53  | AADA4L4    |
| TP53  | ACBD6      |
| TP53  | ADARB1     |
| TP53  | ADGRL4     |
| TP53  | AHDC1      |
| TP53  | AL583842.5 |
| TP53  | ANKRD13C   |
| TP53  | ANKRD45    |

|      |          |
|------|----------|
| TP53 | ARHGEF7  |
| TP53 | ASH1L    |
| TP53 | BCL10    |
| TP53 | C1orf105 |
| TP53 | C1orf141 |
| TP53 | C1orf186 |
| TP53 | C1orf196 |
| TP53 | C1orf198 |
| TP53 | CACNA1E  |
| TP53 | CAPN2    |
| TP53 | CASQ2    |
| TP53 | CASZ1    |
| TP53 | CCDC30   |
| TP53 | CDC7     |
| TP53 | CELA3B   |
| TP53 | CHCHD2P5 |
| TP53 | CHI3L2   |
| TP53 | CICP13   |
| TP53 | CITED4   |
| TP53 | CLDN19   |
| TP53 | COG2     |
| TP53 | COL11A1  |
| TP53 | CR1L     |
| TP53 | CREG1    |
| TP53 | CROCC    |
| TP53 | CROCCP3  |
| TP53 | CTBS     |
| TP53 | CTPS1    |
| TP53 | DAB1     |
| TP53 | DCC      |
| TP53 | DDAH1    |
| TP53 | DENND2C  |
| TP53 | DHRS3    |

|      |            |
|------|------------|
| TP53 | DISC1      |
| TP53 | DISP1      |
| TP53 | DNM3       |
| TP53 | DSTYK      |
| TP53 | DYRK3      |
| TP53 | EDN2       |
| TP53 | EIF4G3     |
| TP53 | ELF3       |
| TP53 | EMBP1      |
| TP53 | EOMES      |
| TP53 | EPHA2      |
| TP53 | EPHB2      |
| TP53 | ERVMER61-1 |
| TP53 | ESPNP      |
| TP53 | FAF1       |
| TP53 | FAM102B    |
| TP53 | FAM132A    |
| TP53 | FAM183A    |
| TP53 | FAM19A3    |
| TP53 | FAM20B     |
| TP53 | FCAMR      |
| TP53 | FCGR2A     |
| TP53 | FCGR2C     |
| TP53 | FDPSP1     |
| TP53 | FGGY       |
| TP53 | FMO7P      |
| TP53 | FNDC7      |
| TP53 | FOXO6      |
| TP53 | FUBP1      |
| TP53 | FUCA1      |
| TP53 | GADD45A    |
| TP53 | GALNT2     |
| TP53 | GBP5       |

|      |             |
|------|-------------|
| TP53 | GGPS1       |
| TP53 | GIPC2       |
| TP53 | GNG12       |
| TP53 | GRIK3       |
| TP53 | GTF2B       |
| TP53 | HAO2        |
| TP53 | HES2        |
| TP53 | HFM1        |
| TP53 | HHAT        |
| TP53 | HIVEP3      |
| TP53 | HMGB1P18    |
| TP53 | HS2ST1      |
| TP53 | hsa-miR-137 |
| TP53 | hsa-miR-137 |
| TP53 | hsa-miR-205 |
| TP53 | HSD3BP5     |
| TP53 | IER5        |
| TP53 | IL19        |
| TP53 | IL20        |
| TP53 | IL22RA1     |
| TP53 | IL23R       |
| TP53 | INADL       |
| TP53 | INPP5B      |
| TP53 | IRF2BP2     |
| TP53 | JAK1        |
| TP53 | KAZN        |
| TP53 | KCNK1       |
| TP53 | KCNK2       |
| TP53 | KCNN3       |
| TP53 | KIAA0754    |
| TP53 | KIAA1324    |
| TP53 | KRT18P28    |
| TP53 | LAPTM5      |

|      |              |
|------|--------------|
| TP53 | LCE1E        |
| TP53 | LCE5A        |
| TP53 | LHX8         |
| TP53 | LIN28A       |
| TP53 | LINC00184    |
| TP53 | LMNA         |
| TP53 | LOC101930059 |
| TP53 | LRRC7        |
| TP53 | LRRIQ3       |
| TP53 | LY9          |
| TP53 | LYST         |
| TP53 | MACF1        |
| TP53 | MAEL         |
| TP53 | MAST2        |
| TP53 | MATN1        |
| TP53 | MDM4         |
| TP53 | MDS2         |
| TP53 | MED18        |
| TP53 | MFSD2A       |
| TP53 | MIER1        |
| TP53 | MIR34A       |
| TP53 | MOV10        |
| TP53 | MSH4         |
| TP53 | MTF2         |
| TP53 | NEGR1        |
| TP53 | NENF         |
| TP53 | NFYC         |
| TP53 | NGF          |
| TP53 | NHLH2        |
| TP53 | NIPAL3       |
| TP53 | NOS1AP       |
| TP53 | NOTCH2       |
| TP53 | NPL          |



|      |          |
|------|----------|
| TP53 | NRD1     |
| TP53 | NSUN4    |
| TP53 | NTNG1    |
| TP53 | NTPCR    |
| TP53 | OSBPL9   |
| TP53 | PADI4    |
| TP53 | PALMD    |
| TP53 | PCNXL2   |
| TP53 | PDE4B    |
| TP53 | PEX11B   |
| TP53 | PGCP1    |
| TP53 | PHACTR4  |
| TP53 | PHBP3    |
| TP53 | PHLDA3   |
| TP53 | PKN2     |
| TP53 | PLA2G2F  |
| TP53 | PLD5     |
| TP53 | PLK3     |
| TP53 | PLXNA2   |
| TP53 | POGZ     |
| TP53 | PPAP2B   |
| TP53 | PPM1J    |
| TP53 | PRDX1    |
| TP53 | PRMT6    |
| TP53 | PSMC1P12 |
| TP53 | PTCHD2   |
| TP53 | PTGFRN   |
| TP53 | PTPN14   |
| TP53 | PTPRF    |
| TP53 | PTPRU    |
| TP53 | PVRL4    |
| TP53 | PYHIN1   |
| TP53 | RAB3GAP2 |

|      |              |
|------|--------------|
| TP53 | RASAL2       |
| TP53 | RB1CC1       |
| TP53 | RBBP5        |
| TP53 | RCC2         |
| TP53 | RGS18        |
| TP53 | RGS7         |
| TP53 | RGS8         |
| TP53 | RNA5SP66     |
| TP53 | RNU1-130P    |
| TP53 | RNU1-92P     |
| TP53 | RNU6-1031P   |
| TP53 | RNU6-40P     |
| TP53 | RNU6-778P    |
| TP53 | RNU6-965P    |
| TP53 | RNU6-983P    |
| TP53 | RNU7-62P     |
| TP53 | RNVU1-8      |
| TP53 | RP11-423O2.3 |
| TP53 | RPS27        |
| TP53 | RPTN         |
| TP53 | RRM1         |
| TP53 | RUNX3        |
| TP53 | RWDD3        |
| TP53 | S100A2       |
| TP53 | S100A6       |
| TP53 | S100B        |
| TP53 | SCGB1D2      |
| TP53 | SCMH1        |
| TP53 | SCNM1        |
| TP53 | SDF4         |
| TP53 | SERTAD1      |
| TP53 | SF3A3        |
| TP53 | SGIP1        |

|      |            |
|------|------------|
| TP53 | SIKE1      |
| TP53 | SLC2A1     |
| TP53 | SLC30A1    |
| TP53 | SLC44A5    |
| TP53 | SMG7       |
| TP53 | snoU13     |
| TP53 | SNX7       |
| TP53 | SPATA6     |
| TP53 | SRGAP2B    |
| TP53 | ST6GALNAC3 |
| TP53 | ST6GALNAC5 |
| TP53 | SUSD4      |
| TP53 | TAF12      |
| TP53 | TARBP1     |
| TP53 | TARS2      |
| TP53 | TCEA3      |
| TP53 | TM2D1      |
| TP53 | TMEM183    |
| TP53 | TMEM54     |
| TP53 | TNFRSF10B  |
| TP53 | TNFRSF1B   |
| TP53 | TP73       |
| TP53 | TPM3       |
| TP53 | TRIM33     |
| TP53 | TSNAX      |
| TP53 | TSPAN1     |
| TP53 | TSPAN2     |
| TP53 | U3         |
| TP53 | U3         |
| TP53 | UBE2J2     |
| TP53 | UBE2WP1    |
| TP53 | UBE4B      |
| TP53 | UCK2       |

|      |                 |
|------|-----------------|
| TP53 | UQCRBP2         |
| TP53 | VANGL2          |
| TP53 | VAV3            |
| TP53 | VPS72           |
| TP53 | WARS2           |
| TP53 | WDR47           |
| TP53 | WNT9A           |
| TP53 | XPR1            |
| TP53 | Y_RNA           |
| TP53 | ZC3H11B         |
| TP53 | ZCCHC11         |
| FOS  | ALKBH7          |
| FOS  | CAMTA1          |
| FOS  | AP5Z1           |
| FOS  | RNA5SP376       |
| FOS  | ANO8            |
| FOS  | SNHG10          |
| FOS  | ASNA1           |
| FOS  | BABAM1          |
| FOS  | C19orf40        |
| FOS  | BCAS3           |
| FOS  | ARRDC4          |
| FOS  | ABCB8           |
| FOS  | ABHD2           |
| FOS  | ACTA1           |
| FOS  | ACTL6A          |
| FOS  | AGFG2           |
| FOS  | AK2             |
| FOS  | AKAP8L          |
| FOS  | AKR1D1          |
| FOS  | ANKHD1-EIF4EBP3 |
| FOS  | ANKRD11         |
| FOS  | AP2A1           |

|     |           |
|-----|-----------|
| FOS | ARID4A    |
| FOS | ASF1B     |
| FOS | ATP5B     |
| FOS | C14orf159 |
| FOS | C1orf228  |
| FOS | CCDC61    |
| FOS | CCL2      |
| FOS | CCT7      |
| FOS | CD300LB   |
| FOS | CDCA2     |
| FOS | CDK2AP2   |
| FOS | CENPA     |
| FOS | CLDN9     |
| FOS | CNOT1     |
| FOS | CNOT3     |
| FOS | CNTD2     |
| FOS | COPZ1     |
| FOS | CPLX1     |
| FOS | DCAF15    |
| FOS | DCAF7     |
| FOS | DCAKD     |
| FOS | DCUN1D4   |
| FOS | DGCR8     |
| FOS | DGKG      |
| FOS | DNAJB5    |
| FOS | DNM2      |
| FOS | DOLPP1    |
| FOS | EHBP1     |
| FOS | EIF2AK3   |
| FOS | ENSA      |
| FOS | ENTHD2    |
| FOS | ERF       |
| FOS | EVI5L     |

|     |           |
|-----|-----------|
| FOS | FAM117A   |
| FOS | FAM126A   |
| FOS | FBXO24    |
| FOS | FDFT1     |
| FOS | FLAD1     |
| FOS | FLYWCH1   |
| FOS | FRYL      |
| FOS | G3BP1     |
| FOS | GATAD2A   |
| FOS | GATAD2B   |
| FOS | GET4      |
| FOS | GFAP      |
| FOS | GOLPH3L   |
| FOS | GOT1      |
| FOS | GPR108    |
| FOS | GPR84     |
| FOS | GRK6      |
| FOS | H2AFV     |
| Fos | HBEGF     |
| FOS | HBP1      |
| FOS | HIST1H2AG |
| FOS | HIST1H2BK |
| FOS | HMGCS1    |
| FOS | HNRNPA1   |
| FOS | HNRNPC    |
| FOS | HNRNPL    |
| FOS | HNRNPUL1  |
| FOS | HSPA5     |
| FOS | HSPB6     |
| FOS | INCENP    |
| FOS | IQCD      |
| FOS | ISOC2     |
| FOS | JUP       |

|     |           |
|-----|-----------|
| FOS | KAT6B     |
| FOS | KATNB1    |
| FOS | KCNAB2    |
| FOS | KDM4A     |
| FOS | KDM4B     |
| FOS | KMT2A     |
| FOS | LENG1     |
| FOS | LRRC48    |
| FOS | MIR1306   |
| FOS | MIR4656   |
| FOS | MIR4746   |
| FOS | MIR4800   |
| FOS | MIR6791   |
| FOS | MIRLET7A1 |
| FOS | MPND      |
| FOS | MPV17L2   |
| FOS | MSANTD4   |
| FOS | MSMO1     |
| FOS | MTMR12    |
| FOS | MTMR4     |
| FOS | MTOR      |
| FOS | MXD1      |
| FOS | MXD4      |
| FOS | MXRA7     |
| FOS | NFATC2IP  |
| FOS | NFYC      |
| FOS | NLK       |
| FOS | NRL       |
| FOS | NUMB      |
| FOS | OIP5      |
| FOS | ORMDL2    |
| FOS | OSBP      |
| FOS | P4HB      |

|     |            |
|-----|------------|
| FOS | PABPN1     |
| FOS | PDXP       |
| FOS | PENK       |
| FOS | PGP        |
| FOS | PHPT1      |
| FOS | PLAUR      |
| FOS | PMEL       |
| FOS | PPM1B      |
| FOS | PPP1R3F    |
| FOS | PPP6R3     |
| FOS | PRKACA     |
| FOS | PRMT1      |
| FOS | PRPF40A    |
| FOS | PRR11      |
| FOS | PRRC2B     |
| FOS | PWWP2A     |
| FOS | PXMP4      |
| FOS | RAB11B     |
| FOS | RAB3A      |
| FOS | RAB40C     |
| FOS | RBM14-RBM4 |
| FOS | RBM15      |
| FOS | RBM27      |
| FOS | RBM38      |
| FOS | RFWD3      |
| FOS | RFX1       |
| FOS | RHCE       |
| FOS | RNF5       |
| FOS | ROGDI      |
| FOS | SDF2L1     |
| FOS | SEN3       |
| FOS | SERPINA3   |
| FOS | SERTAD2    |



|     |          |
|-----|----------|
| FOS | SETD5    |
| FOS | SHARPIN  |
| FOS | SHC1     |
| FOS | SIN3A    |
| FOS | SLC25A25 |
| FOS | SLC25A41 |
| FOS | SLC25A42 |
| FOS | SMPD4P1  |
| FOS | SP1      |
| FOS | SP2      |
| FOS | SPAG7    |
| FOS | SPSB3    |
| FOS | SPTBN4   |
| FOS | SPTLC2   |
| FOS | STIP1    |
| FOS | STK40    |
| FOS | STRA13   |
| FOS | STT3A    |
| FOS | SUV420H2 |
| FOS | SWSAP1   |
| FOS | SYP      |
| FOS | TANGO2   |
| FOS | TBC1D10B |
| FOS | TCERG1   |
| FOS | TDRKH    |
| FOS | TEX19    |
| FOS | TICRR    |
| FOS | TMEM160  |
| FOS | TMEM60   |
| FOS | TNRC6B   |
| FOS | TOM1     |
| FOS | TOMM40   |
| FOS | TOP2A    |

|       |          |
|-------|----------|
| FOS   | TRAF2    |
| FOS   | TRAPPC6A |
| FOS   | TSPEAR   |
| FOS   | TUBB4B   |
| FOS   | UBXN6    |
| FOS   | USP5     |
| FOS   | UVRAG    |
| FOS   | VIM      |
| FOS   | VIP      |
| FOS   | WBP1     |
| FOS   | WHAMM    |
| FOS   | YBX1     |
| FOS   | YIF1A    |
| FOS   | ZBTB20   |
| FOS   | ZBTB3    |
| FOS   | ZBTB32   |
| FOS   | ZBTB5    |
| FOS   | ZFYVE21  |
| FOS   | ZNF143   |
| FOS   | ZNF555   |
| FOS   | ZNF574   |
| FOS   | ZNF687   |
| FOS   | ZNF77    |
| FOS   | ZNF775   |
| FOS   | ZSWIM1   |
| FOS   | ZSWIM4   |
| RUNX1 | AHI1     |
| RUNX1 | RUNX1    |
| RUNX1 | ATP11A   |
| RUNX1 | ADARB2   |
| RUNX1 | ARHGEF6  |
| RUNX1 | BRD9     |
| RUNX1 | ATG16L1  |

|       |            |
|-------|------------|
| RUNX1 | ARHGAP39   |
| RUNX1 | ANKFN1     |
| RUNX1 | ACSF3      |
| RUNX1 | ADRA1A     |
| RUNX1 | AGTR1      |
| RUNX1 | AGTRAP     |
| RUNX1 | ANKRD20A7P |
| RUNX1 | ANXA1      |
| RUNX1 | API5       |
| RUNX1 | ARHGEF12   |
| RUNX1 | BTD        |
| RUNX1 | C10orf107  |
| RUNX1 | C11orf74   |
| RUNX1 | C9orf171   |
| RUNX1 | C9orf47    |
| RUNX1 | CCBE1      |
| RUNX1 | CD1A       |
| RUNX1 | CD84       |
| RUNX1 | CDC16      |
| RUNX1 | CDH13      |
| RUNX1 | CDK6       |
| RUNX1 | CLPTM1L    |
| RUNX1 | CNTRL      |
| RUNX1 | COL4A2     |
| RUNX1 | CPN2       |
| RUNX1 | CPXM2      |
| RUNX1 | CREBBP     |
| RUNX1 | DAD1       |
| RUNX1 | DENND1A    |
| RUNX1 | DESI1      |
| RUNX1 | DGCR6      |
| RUNX1 | DIAPH1     |
| RUNX1 | DIP2C      |

|       |              |
|-------|--------------|
| RUNX1 | DOCK1        |
| RUNX1 | DOCK5        |
| RUNX1 | DOCK6        |
| RUNX1 | DPF3         |
| RUNX1 | EPHA3        |
| RUNX1 | EPS15L1      |
| RUNX1 | ETV5         |
| RUNX1 | ETV6         |
| RUNX1 | FAM49A       |
| RUNX1 | FARS2        |
| RUNX1 | FCHO2        |
| RUNX1 | FNBP1        |
| RUNX1 | FOXB1        |
| RUNX1 | FRYL         |
| RUNX1 | FSIP1        |
| RUNX1 | FTO          |
| RUNX1 | GABRG3       |
| RUNX1 | GARNL3       |
| RUNX1 | GFRA1        |
| RUNX1 | GLG1         |
| RUNX1 | GMEB2        |
| RUNX1 | GNAQ         |
| RUNX1 | GOLGA1       |
| RUNX1 | GSTA4        |
| RUNX1 | GYPE         |
| RUNX1 | HHIP         |
| RUNX1 | HMGB1P5      |
| RUNX1 | HMG3P1       |
| RUNX1 | hsa-miR-1247 |
| RUNX1 | IER5         |
| RUNX1 | IGHV1-2      |
| RUNX1 | IL21         |
| RUNX1 | IL3          |

|       |           |
|-------|-----------|
| RUNX1 | IQGAP2    |
| RUNX1 | IRX3      |
| RUNX1 | ISPD      |
| RUNX1 | ITGA1     |
| RUNX1 | KATNAL1   |
| RUNX1 | KIAA1462  |
| RUNX1 | KIF26B    |
| RUNX1 | KRI1      |
| RUNX1 | KRT18P51  |
| RUNX1 | LAMA3     |
| RUNX1 | LCP2      |
| RUNX1 | LINC00477 |
| RUNX1 | LINC01550 |
| RUNX1 | LINC01600 |
| RUNX1 | LIPC      |
| RUNX1 | LMO2      |
| RUNX1 | LRRC1     |
| RUNX1 | LZTFL1    |
| RUNX1 | MAD1L1    |
| RUNX1 | MAP3K8    |
| RUNX1 | MARCH1    |
| RUNX1 | MCTP2     |
| RUNX1 | ME3       |
| RUNX1 | MED12L    |
| RUNX1 | METTL25   |
| RUNX1 | MIR181A1  |
| RUNX1 | MORN3     |
| RUNX1 | MSI2      |
| RUNX1 | MTND6P16  |
| RUNX1 | MTND6P7   |
| RUNX1 | MYO18B    |
| RUNX1 | NDST3     |
| RUNX1 | NEIL2     |

|       |           |
|-------|-----------|
| RUNX1 | NEIL3     |
| RUNX1 | NEK7      |
| RUNX1 | NOSIP     |
| RUNX1 | OSBPL3    |
| RUNX1 | PAN3      |
| RUNX1 | PARVB     |
| RUNX1 | PDE3B     |
| RUNX1 | PELI2     |
| RUNX1 | PHKA1P1   |
| RUNX1 | PIWIL1    |
| RUNX1 | PLCE1     |
| RUNX1 | PLCL1     |
| RUNX1 | PLCL2     |
| RUNX1 | PLXND1    |
| RUNX1 | PMEPA1    |
| RUNX1 | PPFIBP1   |
| RUNX1 | PPM1A     |
| RUNX1 | PREX2     |
| RUNX1 | PRKCA     |
| RUNX1 | PRKCQ     |
| RUNX1 | PRR5L     |
| RUNX1 | PTAFR     |
| RUNX1 | PTPRK     |
| RUNX1 | PVALB     |
| RUNX1 | RALGPS1   |
| RUNX1 | RCBTB2    |
| RUNX1 | RGS1      |
| RUNX1 | RGS16     |
| RUNX1 | RN7SKP206 |
| RUNX1 | RN7SKP240 |
| RUNX1 | RN7SKP79  |
| RUNX1 | RNA5SP127 |
| RUNX1 | RNA5SP348 |

|       |             |
|-------|-------------|
| RUNX1 | RNA5SP400   |
| RUNX1 | RNU1-35P    |
| RUNX1 | RNU6-442P   |
| RUNX1 | RNU6-793P   |
| RUNX1 | RNU6ATAC14P |
| RUNX1 | RNU7-120P   |
| RUNX1 | RNU7-133P   |
| RUNX1 | RTKN2       |
| RUNX1 | RTP5        |
| RUNX1 | RYR1        |
| RUNX1 | SEC23IP     |
| RUNX1 | SEC31B      |
| RUNX1 | SERINC5     |
| RUNX1 | SGSM1       |
| RUNX1 | SH3BP5      |
| RUNX1 | SIPA1L2     |
| RUNX1 | SLC44A1     |
| RUNX1 | SLC47A1     |
| RUNX1 | SMCO1       |
| RUNX1 | SNAI2       |
| RUNX1 | SOX11       |
| RUNX1 | SPAG16      |
| RUNX1 | SPAG5       |
| RUNX1 | ST18        |
| RUNX1 | STX3        |
| RUNX1 | SUSD1       |
| RUNX1 | SYK         |
| RUNX1 | SYTL2       |
| RUNX1 | TBC1D4      |
| RUNX1 | TBPL1       |
| RUNX1 | TCF7        |
| RUNX1 | TDRD12      |
| RUNX1 | TENM1       |

|       |            |
|-------|------------|
| RUNX1 | TLE1       |
| RUNX1 | TMEM209    |
| RUNX1 | TNRC18     |
| RUNX1 | TOX2       |
| RUNX1 | TPRA1      |
| RUNX1 | TRBV30     |
| RUNX1 | TRIB1      |
| RUNX1 | TSPAN7     |
| RUNX1 | TTC28      |
| RUNX1 | UACA       |
| RUNX1 | UCA1       |
| RUNX1 | VSIG6      |
| RUNX1 | WASF1      |
| RUNX1 | WDR37      |
| RUNX1 | WDR70      |
| RUNX1 | XKR6       |
| RUNX1 | Y_RNA      |
| RUNX1 | ZCCHC5     |
| RUNX1 | ZNF318     |
| RUNX1 | ZNF595     |
| EGR1  | ATP4A      |
| EGR1  | ANKRD30BL  |
| EGR1  | ALDOC      |
| EGR1  | FAM136BP   |
| EGR1  | ADGRV1     |
| EGR1  | BCR        |
| EGR1  | C9orf106   |
| EGR1  | KLF3       |
| EGR1  | RTEL1      |
| EGR1  | SLC19A1    |
| EGR1  | ABL1       |
| EGR1  | AC099522.3 |
| EGR1  | ACHE       |



|      |           |
|------|-----------|
| EGR1 | AGPAT3    |
| EGR1 | AIG1      |
| EGR1 | ANK1      |
| EGR1 | AP1S1     |
| EGR1 | ARHGEF16  |
| EGR1 | BAG6      |
| EGR1 | BAIAP2    |
| EGR1 | BHLHE40   |
| EGR1 | BMP7      |
| EGR1 | C17orf103 |
| EGR1 | C19orf38  |
| EGR1 | C22orf39  |
| EGR1 | C7orf50   |
| EGR1 | C8orf33   |
| EGR1 | CACNA1B   |
| EGR1 | CAMSAP1   |
| EGR1 | CARTPT    |
| EGR1 | CATSPER1  |
| EGR1 | CBFA2T3   |
| EGR1 | CBFB      |
| EGR1 | CBX2      |
| EGR1 | CCDC57    |
| EGR1 | CCDC9     |
| EGR1 | CCL27     |
| EGR1 | CDC27P1   |
| EGR1 | CDH15     |
| EGR1 | CEP72     |
| EGR1 | CHID1     |
| EGR1 | CHMP6     |
| EGR1 | CKAP4     |
| EGR1 | CLIC4     |
| EGR1 | COG1      |
| EGR1 | COL18A1   |

|      |              |
|------|--------------|
| EGR1 | COL23A1      |
| EGR1 | COL8A2       |
| EGR1 | CPLX1        |
| EGR1 | CRISPLD2     |
| EGR1 | DDX20        |
| EGR1 | DLG2         |
| EGR1 | DMBX1        |
| EGR1 | DNAH9        |
| EGR1 | DPF1         |
| EGR1 | EFR3B        |
| EGR1 | EIF2AP4      |
| EGR1 | FABP5P11     |
| EGR1 | FAIM         |
| EGR1 | FAM150B      |
| EGR1 | FAM157A      |
| EGR1 | FAM178B      |
| EGR1 | FAM78A       |
| EGR1 | FAM84A       |
| EGR1 | FAT3         |
| EGR1 | FBXL12       |
| EGR1 | FLT4         |
| EGR1 | FOXL1        |
| EGR1 | GALNT18      |
| EGR1 | GAPDHP15     |
| EGR1 | GATA2        |
| EGR1 | GCSH         |
| EGR1 | GIPC2        |
| EGR1 | GPR157       |
| EGR1 | GSE1         |
| EGR1 | HADHB        |
| EGR1 | HFM1         |
| EGR1 | hsa-miR-1977 |
| EGR1 | HSPG2        |

|      |           |
|------|-----------|
| EGR1 | IGLC7     |
| EGR1 | IGLVI-20  |
| EGR1 | IL12B     |
| EGR1 | JOSD2     |
| EGR1 | KBTBD2    |
| EGR1 | KDM1B     |
| EGR1 | KIF26B    |
| EGR1 | KLF10     |
| EGR1 | KLF11     |
| EGR1 | KLHL22    |
| EGR1 | LAPTM5    |
| EGR1 | LINC00114 |
| EGR1 | LINC00273 |
| EGR1 | LINC00311 |
| EGR1 | LINC00574 |
| EGR1 | LRRC27    |
| EGR1 | LRRC3C    |
| EGR1 | LRRC8B    |
| EGR1 | LSS       |
| EGR1 | LY6E      |
| EGR1 | MAF       |
| EGR1 | MAPK1     |
| EGR1 | MARVELD3  |
| EGR1 | MCFD2     |
| EGR1 | ME1       |
| EGR1 | MIA3      |
| EGR1 | MIR607    |
| EGR1 | MKLN1     |
| EGR1 | MTDH      |
| EGR1 | MYT1L     |
| EGR1 | NAA11     |
| EGR1 | NAB1      |
| EGR1 | NAB2      |

|      |           |
|------|-----------|
| EGR1 | NAT16     |
| EGR1 | NCOR1P1   |
| EGR1 | NOS3      |
| EGR1 | ONECUT2   |
| EGR1 | PABPC1P8  |
| EGR1 | PCBD2     |
| EGR1 | PCMTD2    |
| EGR1 | PDE3A     |
| EGR1 | PHF2      |
| EGR1 | PHLDB1    |
| EGR1 | PI4KA     |
| EGR1 | PID1      |
| EGR1 | PIGX      |
| EGR1 | PMF1      |
| EGR1 | PMPCA     |
| EGR1 | POLG      |
| EGR1 | POLR1C    |
| EGR1 | PROSER2   |
| EGR1 | PRUNE2    |
| EGR1 | PSMD13    |
| EGR1 | PTRF      |
| EGR1 | QSER1     |
| EGR1 | RAP1A     |
| EGR1 | RECQL4    |
| EGR1 | RFX2      |
| EGR1 | RNA5-8SP4 |
| EGR1 | RNA5SP357 |
| EGR1 | RNF212    |
| EGR1 | RNU1-104P |
| EGR1 | RNU6-231P |
| EGR1 | RNU6-309P |
| EGR1 | RNU6-417P |
| EGR1 | ROCK1     |

|      |          |
|------|----------|
| EGR1 | RORA     |
| EGR1 | RRAD     |
| EGR1 | RSPH14   |
| EGR1 | RUFY1    |
| EGR1 | SCARB1   |
| EGR1 | SCMH1    |
| EGR1 | SCUBE1   |
| EGR1 | SDC3     |
| EGR1 | SEH1L    |
| EGR1 | SLC22A20 |
| EGR1 | SLCO5A1  |
| EGR1 | SMIM24   |
| EGR1 | SNAPC2   |
| EGR1 | SNORA57  |
| EGR1 | snoU13   |
| EGR1 | SNX8     |
| EGR1 | SP3      |
| EGR1 | SUMO3    |
| EGR1 | SYNGAP1  |
| EGR1 | TAF4     |
| EGR1 | TALDO1   |
| EGR1 | TBX1     |
| EGR1 | TMEM106A |
| EGR1 | TMEM120B |
| EGR1 | TMEM63C  |
| EGR1 | TNFRSF6B |
| EGR1 | TNS3     |
| EGR1 | TRAM2    |
| EGR1 | TRAPPC8  |
| EGR1 | TRIO     |
| EGR1 | TTC3     |
| EGR1 | UBE2W    |
| EGR1 | UBP1     |

|      |          |
|------|----------|
| EGR1 | UGT2B4   |
| EGR1 | UNC45B   |
| EGR1 | UPK3A    |
| EGR1 | UPK3B    |
| EGR1 | USP14    |
| EGR1 | VPS9D1   |
| EGR1 | Y_RNA    |
| EGR1 | ZC3H4    |
| EGR1 | ZCWPW1   |
| EGR1 | ZNF280B  |
| EGR1 | ZNF480   |
| EGR1 | ZNF664   |
| EGR1 | ZYX      |
| SOX2 | ATP5LP4  |
| SOX2 | BMP7     |
| SOX2 | ANO1-AS2 |
| SOX2 | ARID5B   |
| SOX2 | RUNX1    |
| SOX2 | APIP     |
| SOX2 | BMP2     |
| SOX2 | ACTR1A   |
| SOX2 | C7orf33  |
| SOX2 | ABCA12   |
| SOX2 | ABTB2    |
| SOX2 | ADAMTSL1 |
| SOX2 | ACIN1    |
| SOX2 | CACNA1A  |
| SOX2 | ADRA1A   |
| SOX2 | AGMO     |
| SOX2 | AJAP1    |
| SOX2 | ALCAM    |
| SOX2 | 5S_rRNA  |
| SOX2 | AAMDC    |

|      |           |
|------|-----------|
| SOX2 | ABCB7     |
| SOX2 | ADAM28    |
| SOX2 | ADAMTS16  |
| SOX2 | ADAMTS19  |
| SOX2 | ADRA1B    |
| SOX2 | AFF3      |
| SOX2 | ANO1      |
| SOX2 | AP2A1     |
| SOX2 | AP3B1     |
| SOX2 | APP       |
| SOX2 | AQP2      |
| SOX2 | ARFGEF1   |
| SOX2 | ARRDC3    |
| SOX2 | ASNS      |
| SOX2 | AUH       |
| SOX2 | BCAT1     |
| SOX2 | BCL2      |
| SOX2 | BTG1      |
| SOX2 | C10orf126 |
| SOX2 | C1orf174  |
| SOX2 | C9orf92   |
| SOX2 | CA4       |
| SOX2 | CACNA2D1  |
| SOX2 | CACNB2    |
| SOX2 | CASP10    |
| SOX2 | CCDC171   |
| SOX2 | CCND1     |
| SOX2 | CD82      |
| SOX2 | CDH2      |
| SOX2 | CIITA     |
| SOX2 | COL12A1   |
| SOX2 | COL15A1   |
| SOX2 | COL4A1    |

|      |           |
|------|-----------|
| SOX2 | COL4A5    |
| SOX2 | CPED1     |
| SOX2 | CPN2      |
| SOX2 | CPXM2     |
| SOX2 | CRISPLD2  |
| SOX2 | CRYBB2P1  |
| SOX2 | CSDC2     |
| SOX2 | CTH       |
| SOX2 | CXCL8     |
| SOX2 | DCHS2     |
| SOX2 | DSEL      |
| SOX2 | EBF3      |
| SOX2 | EEF1A1P6  |
| SOX2 | ELL2P3    |
| SOX2 | ENAH      |
| SOX2 | EPHA6     |
| SOX2 | EPS8L2    |
| SOX2 | FAM19A3   |
| SOX2 | FAM20A    |
| SOX2 | FILIP1L   |
| SOX2 | FTH1P10   |
| SOX2 | FZD9      |
| SOX2 | GADD45A   |
| SOX2 | HEY2      |
| SOX2 | HNRNPA3P5 |
| SOX2 | HS3ST1    |
| SOX2 | ICE1      |
| SOX2 | IL6       |
| SOX2 | JAKMIP3   |
| SOX2 | KANK1     |
| SOX2 | KIT       |
| SOX2 | LCA5      |
| SOX2 | LMCD1     |



|      |            |
|------|------------|
| SOX2 | LYRM9      |
| SOX2 | MACROD2    |
| SOX2 | MFNG       |
| SOX2 | N4BP2L2    |
| SOX2 | NEDD4      |
| SOX2 | NEGR1      |
| SOX2 | NFATC2     |
| SOX2 | NR3C2      |
| SOX2 | NRG1       |
| SOX2 | NUPL1      |
| SOX2 | ONECUT1    |
| SOX2 | OTUD6B     |
| SOX2 | PCBP2P3    |
| SOX2 | PCDH10     |
| SOX2 | PCLO       |
| SOX2 | PCSK6      |
| SOX2 | PDE4D      |
| SOX2 | PDK1       |
| SOX2 | PGAP2      |
| SOX2 | PHB        |
| SOX2 | PHKA1P1    |
| Sox2 | POU5F1     |
| SOX2 | PPM1E      |
| SOX2 | PTHLH      |
| SOX2 | PXDC1      |
| SOX2 | RAB37      |
| SOX2 | RN7SKP298  |
| SOX2 | RN7SKP73   |
| SOX2 | RNA5SP401  |
| SOX2 | RNA5SP52   |
| SOX2 | RNU6-1012P |
| SOX2 | RNU6-1186P |
| SOX2 | RNU6-1246P |

|      |           |
|------|-----------|
| SOX2 | RNU6-443P |
| SOX2 | RNU6-578P |
| SOX2 | RNU6-66P  |
| SOX2 | RNU6-675P |
| SOX2 | RNU6-929P |
| SOX2 | S100A2    |
| SOX2 | SAMD12    |
| SOX2 | SDK1      |
| SOX2 | SEMA5A    |
| SOX2 | SLC30A1   |
| SOX2 | SLC3A2    |
| SOX2 | SLC7A1    |
| SOX2 | SNHG5     |
| SOX2 | SNORA51   |
| SOX2 | SNORD28   |
| SOX2 | snoRNA    |
| SOX2 | snoU13    |
| SOX2 | snoZ13    |
| SOX2 | SOCS2     |
| SOX2 | SORBS2    |
| SOX2 | SPATA6L   |
| SOX2 | SYT4      |
| SOX2 | TNFAIP3   |
| SOX2 | TRIM36    |
| SOX2 | TRPM3     |
| SOX2 | U3        |
| SOX2 | YWHAZP2   |
| SOX2 | ZDBF2     |
| SOX2 | ZDHHC11   |
| SOX2 | ZNRF3     |
| ETS1 | CROCCP2   |
| ETS1 | CAMTA1    |
| ETS1 | ALDH4A1   |

|      |          |
|------|----------|
| ETS1 | ATAD3B   |
| ETS1 | ACOT7    |
| ETS1 | RNU1-7P  |
| ETS1 | AGTRAP   |
| ETS1 | C1orf127 |
| ETS1 | ATAD3A   |
| ETS1 | ACTRT2   |
| ETS1 | B3GALT6  |
| ETS1 | ACAP3    |
| ETS1 | APITD1   |
| ETS1 | ARHGEF19 |
| ETS1 | ATP13A2  |
| ETS1 | AURKAIP1 |
| ETS1 | C1orf159 |
| ETS1 | C1orf174 |
| ETS1 | C1orf86  |
| ETS1 | CAMK2N1  |
| ETS1 | CAPZB    |
| ETS1 | CASP9    |
| ETS1 | CCNL2    |
| ETS1 | CDC42    |
| ETS1 | CDK11A   |
| ETS1 | CDK11B   |
| ETS1 | CELA3A   |
| ETS1 | CEP104   |
| ETS1 | CFAP74   |
| ETS1 | CPSF3L   |
| ETS1 | CROCC    |
| ETS1 | CROCCP3  |
| Ets1 | CTGF     |
| ETS1 | CTNNBIP1 |
| ETS1 | DDI2     |
| ETS1 | DDOST    |

|      |              |
|------|--------------|
| ETS1 | DHRS3        |
| ETS1 | DNAJC11      |
| ETS1 | ECE1         |
| ETS1 | EFHD2        |
| ETS1 | EIF4G3       |
| ETS1 | ENO1         |
| ETS1 | EPHA2        |
| ETS1 | ESPNP        |
| ETS1 | EXOSC10      |
| ETS1 | FAM213B      |
| ETS1 | FBLIM1       |
| ETS1 | FBXO2        |
| ETS1 | FBXO42       |
| ETS1 | GNB1         |
| ETS1 | GPR157       |
| ETS1 | H6PD         |
| ETS1 | HES3         |
| ETS1 | HP1BP3       |
| ETS1 | IFFO2        |
| ETS1 | ISG15        |
| ETS1 | KAZN         |
| ETS1 | KCNAB2       |
| ETS1 | KIAA2013     |
| ETS1 | KIF1B        |
| ETS1 | KLHL21       |
| ETS1 | LINC00115    |
| ETS1 | LINC00337    |
| ETS1 | LOC101930059 |
| ETS1 | LRRC47       |
| ETS1 | LZIC         |
| ETS1 | MAD2L2       |
| ETS1 | MFN2         |
| ETS1 | MINOS1       |

|      |            |
|------|------------|
| ETS1 | MIR6727    |
| ETS1 | MORN1      |
| ETS1 | MRPL20     |
| ETS1 | MRTO4      |
| ETS1 | MTHFR      |
| ETS1 | MTOR       |
| ETS1 | MUL1       |
| ETS1 | MXRA8      |
| ETS1 | NADK       |
| ETS1 | NBPF3      |
| ETS1 | NECAP2     |
| ETS1 | NOC2L      |
| ETS1 | NPHP4      |
| ETS1 | OTUD3      |
| ETS1 | PADI1      |
| ETS1 | PANK4      |
| ETS1 | PARK7      |
| ETS1 | PAX7       |
| ETS1 | PEX10      |
| ETS1 | PEX14      |
| ETS1 | PGD        |
| ETS1 | PIK3CD     |
| ETS1 | PIK3CD-AS1 |
| ETS1 | PLEKHG5    |
| ETS1 | PRDM2      |
| ETS1 | PRKCZ      |
| ETS1 | PTCHD2     |
| ETS1 | RAP1GAP    |
| ETS1 | RCC2       |
| ETS1 | RERE       |
| ETS1 | RNA5SP40   |
| ETS1 | RNU1       |
| ETS1 | RNU5E-1    |

|      |            |
|------|------------|
| ETS1 | RNU6-1199P |
| ETS1 | RPL22      |
| ETS1 | RSC1A1     |
| ETS1 | RSG1       |
| ETS1 | SAMD11     |
| ETS1 | SDHB       |
| ETS1 | SKI        |
| ETS1 | SLC25A33   |
| ETS1 | SLC35E2    |
| ETS1 | SNORA70    |
| ETS1 | SPATA21    |
| ETS1 | SPEN       |
| ETS1 | SPSB1      |
| ETS1 | SRM        |
| ETS1 | SSU72      |
| ETS1 | SZRD1      |
| ETS1 | TARDBP     |
| ETS1 | TAS1R1     |
| ETS1 | THAP3      |
| ETS1 | TMEM201    |
| ETS1 | TMEM52     |
| ETS1 | TNFRSF14   |
| ETS1 | TNFRSF1B   |
| ETS1 | TNFRSF4    |
| ETS1 | TNFRSF8    |
| ETS1 | TP73-AS1   |
| ETS1 | TPRG1L     |
| ETS1 | TTC34      |
| ETS1 | UBE2J2     |
| ETS1 | UBE4B      |
| ETS1 | UBIAD1     |
| ETS1 | UBR4       |
| ETS1 | UBXN10     |

|      |              |
|------|--------------|
| ETS1 | USP48        |
| ETS1 | VAMP3        |
| ETS1 | VPS13D       |
| ETS1 | WRAP73       |
| ETS1 | ZBTB17       |
| ETS1 | ZBTB48       |
| CTCF | C1orf196     |
| CTCF | AADA4L4      |
| CTCF | APITD1       |
| CTCF | C1orf127     |
| CTCF | ACTRT2       |
| CTCF | LOC102724203 |
| CTCF | ACOT7        |
| CTCF | AGRN         |
| CTCF | AJAP1        |
| CTCF | AL356693.1   |
| CTCF | APITD1-CORT  |
| CTCF | APP          |
| CTCF | ARHGEF16     |
| CTCF | ARHGEF19     |
| CTCF | C1orf159     |
| CTCF | C1orf174     |
| CTCF | C1orf64      |
| CTCF | C1orf86      |
| CTCF | CA6          |
| CTCF | CALML6       |
| CTCF | CAMTA1       |
| CTCF | CASZ1        |
| CTCF | CEP104       |
| CTCF | CFAP74       |
| CTCF | CHCHD2P6     |
| CTCF | CHD5         |
| CTCF | CLCN6        |

|      |              |
|------|--------------|
| CTCF | CLCNKA       |
| CTCF | CLCNKB       |
| CTCF | CLSTN1       |
| CTCF | CROCCP2      |
| CTCF | CTNNBIP1     |
| CTCF | DHRS3        |
| CTCF | DNAJC11      |
| CTCF | DRAXIN       |
| CTCF | DVL1         |
| CTCF | EFHD2        |
| CTCF | ENO1         |
| CTCF | ERRFI1       |
| CTCF | ESPN         |
| CTCF | ESPNP        |
| CTCF | FAM131C      |
| CTCF | FAM41C       |
| CTCF | FBLIM1       |
| CTCF | FBXO2        |
| CTCF | FHAD1        |
| CTCF | GNB1         |
| CTCF | GPR157       |
| CTCF | H6PD         |
| CTCF | HES3         |
| CTCF | HES4         |
| CTCF | KAZN         |
| CTCF | KCNAB2       |
| CTCF | KIF1B        |
| CTCF | LINC00337    |
| CTCF | LOC101930059 |
| CTCF | LOC102724250 |
| CTCF | LOC102725471 |
| CTCF | LOC400736    |
| CTCF | LZIC         |



|      |          |
|------|----------|
| CTCF | MASP2    |
| CTCF | MEGF6    |
| CTCF | MIR34A   |
| CTCF | MORN1    |
| CTCF | MT1XP1   |
| CTCF | MTOR     |
| CTCF | MXRA8    |
| CTCF | NECAP2   |
| CTCF | NPHP4    |
| CTCF | NPPB     |
| CTCF | PARK7    |
| CTCF | PER3     |
| CTCF | PERM1    |
| CTCF | PEX14    |
| CTCF | PIK3CD   |
| CTCF | PLEKHG5  |
| CTCF | PRAMEF1  |
| CTCF | PRAMEF14 |
| CTCF | PRDM16   |
| CTCF | PRDM2    |
| CTCF | PRKCZ    |
| CTCF | PTCHD2   |
| CTCF | RERE     |
| CTCF | RNA5SP40 |
| CTCF | RNU1-1   |
| CTCF | RNU1-2   |
| CTCF | RNU1-27P |
| CTCF | RNU1-28P |
| CTCF | RNU1-3   |
| CTCF | RNU1-4   |
| CTCF | RNU5E-1  |
| CTCF | RNVU1-18 |
| CTCF | RPL22    |

|       |            |
|-------|------------|
| CTCF  | SAMD11     |
| CTCF  | SCARNA11   |
| CTCF  | SCNN1D     |
| CTCF  | SLC25A33   |
| CTCF  | SLC25A34   |
| CTCF  | SLC45A1    |
| CTCF  | SPSB1      |
| CTCF  | SZRD1      |
| CTCF  | TAS1R1     |
| CTCF  | TMEM201    |
| CTCF  | TMEM51     |
| CTCF  | TMEM51-AS1 |
| CTCF  | TNFRSF14   |
| CTCF  | TNFRSF1B   |
| CTCF  | TNFRSF8    |
| CTCF  | TNFRSF9    |
| CTCF  | TP73       |
| CTCF  | TPRG1L     |
| CTCF  | TTC34      |
| CTCF  | UBE4B      |
| CTCF  | UBIAD1     |
| CTCF  | UTS2       |
| CTCF  | VPS13D     |
| CTCF  | VWA1       |
| GATA3 | ALDH4A1    |
| GATA3 | C1orf196   |
| GATA3 | C1orf174   |
| GATA3 | CAPZB      |
| GATA3 | ACTL8      |
| GATA3 | AADA4L4    |
| GATA3 | ARHGEF10L  |
| GATA3 | ACOT7      |
| GATA3 | AJAP1      |

|       |          |
|-------|----------|
| GATA3 | ASAP3    |
| GATA3 | C1orf127 |
| GATA3 | C1orf159 |
| GATA3 | C1QA     |
| GATA3 | CA6      |
| GATA3 | CAMK2N1  |
| GATA3 | CAMTA1   |
| GATA3 | CDA      |
| GATA3 | CDC42    |
| GATA3 | CELA3A   |
| GATA3 | CHD5     |
| GATA3 | CLSTN1   |
| GATA3 | CNR2     |
| GATA3 | CROCC    |
| GATA3 | CROCCP3  |
| GATA3 | DBH      |
| GATA3 | DHRS3    |
| GATA3 | E2F2     |
| GATA3 | ECE1     |
| GATA3 | EFHD2    |
| GATA3 | EIF4G3   |
| GATA3 | ENO1     |
| GATA3 | EPHA2    |
| GATA3 | ERRFI1   |
| GATA3 | ESPN     |
| GATA3 | ESPNP    |
| GATA3 | EXOSC10  |
| GATA3 | FAM131C  |
| GATA3 | FAM43B   |
| GATA3 | FBLIM1   |
| GATA3 | FHAD1    |
| GATA3 | GNB1     |
| GATA3 | GRHL3    |

|       |              |
|-------|--------------|
| GATA3 | HES4         |
| GATA3 | HMGN2P17     |
| GATA3 | HNRNPR       |
| GATA3 | HSPG2        |
| GATA3 | HTR1D        |
| GATA3 | IFFO2        |
| GATA3 | IGSF21       |
| GATA3 | KAZN         |
| GATA3 | KDM1A        |
| GATA3 | KIAA2013     |
| GATA3 | KIF1B        |
| GATA3 | KLHL21       |
| GATA3 | LINC00115    |
| GATA3 | LOC101930059 |
| GATA3 | LRRC47       |
| GATA3 | MDS2         |
| GATA3 | MIR34A       |
| GATA3 | NBL1         |
| GATA3 | NBPF3        |
| GATA3 | NCMAP        |
| GATA3 | NIPAL3       |
| GATA3 | NMNAT1       |
| GATA3 | NPHP4        |
| GATA3 | OR4F16       |
| GATA3 | OTUD3        |
| GATA3 | PADI1        |
| GATA3 | PADI3        |
| GATA3 | PADI4        |
| GATA3 | PDPN         |
| GATA3 | PEX14        |
| GATA3 | PHF13        |
| GATA3 | PLA2G2A      |
| GATA3 | PLOD1        |

|       |            |
|-------|------------|
| GATA3 | PPP1R11P1  |
| GATA3 | PRDM16     |
| GATA3 | PRDM2      |
| GATA3 | RAP1GAP    |
| GATA3 | RCAN3      |
| GATA3 | RERE       |
| GATA3 | RNA5SP40   |
| GATA3 | RNF223     |
| GATA3 | RNU1       |
| GATA3 | RNU1-7P    |
| GATA3 | RNU6-1072P |
| GATA3 | RNU6-771P  |
| GATA3 | RNU6-991P  |
| GATA3 | SAMD11     |
| GATA3 | SDHB       |
| GATA3 | SLC25A33   |
| GATA3 | SPEN       |
| GATA3 | SPSB1      |
| GATA3 | STPG1      |
| GATA3 | TCEA3      |
| GATA3 | TCEB3      |
| GATA3 | TMCO4      |
| GATA3 | TMEM51     |
| GATA3 | TMEM51-AS1 |
| GATA3 | TNFRSF8    |
| GATA3 | TNFRSF9    |
| GATA3 | TP73       |
| GATA3 | UBE4B      |
| GATA3 | UBIAD1     |
| GATA3 | UBXN10     |
| GATA3 | USP48      |
| GATA3 | VPS13D     |
| GATA3 | VWA5B1     |

|       |            |
|-------|------------|
| GATA3 | WNT4       |
| GATA3 | ZBTB40     |
| ESR2  | AL356693.1 |
| ESR2  | CALML6     |
| ESR2  | ARHGEF10L  |
| ESR2  | ACTL8      |
| ESR2  | AGRN       |
| ESR2  | AHDC1      |
| ESR2  | ALPL       |
| ESR2  | APITD1     |
| ESR2  | ARHGEF16   |
| ESR2  | AUNIP      |
| ESR2  | B3GALT6    |
| ESR2  | C1orf159   |
| ESR2  | C1orf196   |
| ESR2  | CAMTA1     |
| ESR2  | CAPZB      |
| ESR2  | CASZ1      |
| ESR2  | CELA2A     |
| ESR2  | CELA3B     |
| ESR2  | CFAP74     |
| ESR2  | CHD5       |
| ESR2  | CNR2       |
| ESR2  | CTNNBIP1   |
| ESR2  | DHRS3      |
| ESR2  | DVL1       |
| ESR2  | ECE1       |
| ESR2  | ENO1       |
| ESR2  | EPHA2      |
| ESR2  | EPHB2      |
| ESR2  | ESPNP      |
| ESR2  | FAM131C    |
| ESR2  | FBLIM1     |

|      |              |
|------|--------------|
| ESR2 | GNB1         |
| ESR2 | GPR157       |
| ESR2 | H6PD         |
| ESR2 | HES4         |
| ESR2 | HP1BP3       |
| ESR2 | ICMT         |
| ESR2 | IFFO2        |
| ESR2 | IGSF21       |
| ESR2 | KAZN         |
| ESR2 | KCNAB2       |
| ESR2 | KDF1         |
| ESR2 | KLHL21       |
| ESR2 | LACTBL1      |
| ESR2 | LDLRAP1      |
| ESR2 | LIN28A       |
| ESR2 | LINC00115    |
| ESR2 | LOC101930059 |
| ESR2 | LRRC47       |
| ESR2 | MAN1C1       |
| ESR2 | MATN1        |
| ESR2 | MDS2         |
| ESR2 | MECR         |
| ESR2 | MED18        |
| ESR2 | MEGF6        |
| ESR2 | MINOS1       |
| ESR2 | MIR34A       |
| ESR2 | MORN1        |
| ESR2 | MYOM3        |
| ESR2 | NADK         |
| ESR2 | NBPF3        |
| ESR2 | NCMAP        |
| ESR2 | NMNAT1       |
| Esr2 | OXT          |

|      |           |
|------|-----------|
| ESR2 | PADI1     |
| ESR2 | PADI4     |
| ESR2 | PER3      |
| ESR2 | PERM1     |
| ESR2 | PEX10     |
| ESR2 | PEX14     |
| ESR2 | PGD       |
| ESR2 | PHF13     |
| ESR2 | PLEKHG5   |
| ESR2 | PQLC2     |
| ESR2 | PRDM16    |
| ESR2 | PTCHD2    |
| ESR2 | RAP1GAP   |
| ESR2 | RBP7      |
| ESR2 | RCC1      |
| ESR2 | RERE      |
| ESR2 | RNA5SP40  |
| ESR2 | RNF223    |
| ESR2 | RNU1-7P   |
| ESR2 | RNU6-991P |
| ESR2 | RPS6KA1   |
| ESR2 | RUNX3     |
| ESR2 | SFN       |
| ESR2 | SPEN      |
| ESR2 | SPSB1     |
| ESR2 | SRSF10    |
| ESR2 | STPG1     |
| ESR2 | SYTL1     |
| ESR2 | TCEA3     |
| ESR2 | TMCO4     |
| ESR2 | TMEM51    |
| ESR2 | TMEM88B   |
| ESR2 | TNFRSF8   |



|      |            |
|------|------------|
| ESR2 | TRIM63     |
| ESR2 | UBE2J2     |
| ESR2 | UBE4B      |
| ESR2 | VAMP3      |
| ESR2 | VPS13D     |
| ESR2 | VWA5B1     |
| ESR2 | WNT4       |
| ESR2 | ZBTB40     |
| ESR2 | ZNF436     |
| MITF | ACTL8      |
| MITF | CAMTA1     |
| MITF | C1orf196   |
| MITF | ACOT7      |
| MITF | ARHGEF10L  |
| MITF | AL356693.1 |
| MITF | RNU5E-4P   |
| MITF | ACAP3      |
| MITF | AGRN       |
| MITF | AGTRAP     |
| MITF | AKR7A2     |
| MITF | ARHGEF19   |
| MITF | ATAD3A     |
| MITF | C1orf127   |
| MITF | C1orf159   |
| MITF | C1orf174   |
| MITF | C1orf86    |
| MITF | CALML6     |
| MITF | CAPZB      |
| MITF | CFAP74     |
| MITF | CHD5       |
| MITF | CLCN6      |
| MITF | CLSTN1     |
| MITF | CROCC      |

|      |              |
|------|--------------|
| MITF | CROCCP2      |
| MITF | CROCCP3      |
| MITF | DHRS3        |
| MITF | DNAJC16      |
| MITF | EFHD2        |
| MITF | ENO1         |
| MITF | ERRFI1       |
| MITF | ESPNP        |
| MITF | EXOSC10      |
| MITF | FAM131C      |
| MITF | FBXO2        |
| MITF | FHAD1        |
| MITF | GNB1         |
| MITF | GPR157       |
| MITF | H6PD         |
| MITF | IFFO2        |
| MITF | KCNAB2       |
| MITF | KIAA2013     |
| MITF | KLHL21       |
| MITF | LOC101930059 |
| MITF | LRRC47       |
| MITF | LZIC         |
| MITF | MEGF6        |
| MITF | MIB2         |
| MITF | MIIP         |
| MITF | MIR34A       |
| MITF | MST1L        |
| MITF | MTOR         |
| MITF | NADK         |
| MITF | NPHP4        |
| MITF | NPPA-AS1     |
| MITF | NPPB         |
| MITF | PADI1        |

|      |            |
|------|------------|
| MITF | PADI2      |
| MITF | PADI3      |
| MITF | PER3       |
| MITF | PERM1      |
| MITF | PEX14      |
| MITF | PHF13      |
| MITF | PIK3CD     |
| MITF | PLEKHG5    |
| MITF | PLEKHM2    |
| MITF | PLOD1      |
| MITF | PRDM16     |
| MITF | PRKCZ      |
| MITF | RCC2       |
| MITF | RERE       |
| MITF | RNA5SP40   |
| MITF | RNF207     |
| MITF | RNU1-7P    |
| MITF | RPL22      |
| MITF | SAMD11     |
| MITF | SCNN1D     |
| MITF | SDF4       |
| MITF | SDHB       |
| MITF | SKI        |
| MITF | SLC25A33   |
| MITF | SPSB1      |
| MITF | SRM        |
| MITF | SSU72      |
| MITF | SZRD1      |
| MITF | TMEM201    |
| MITF | TMEM51     |
| MITF | TMEM51-AS1 |
| MITF | TNFRSF14   |
| MITF | TNFRSF1B   |

|       |              |
|-------|--------------|
| MITF  | TNFRSF8      |
| MITF  | TYR          |
| MITF  | UBE4B        |
| MITF  | UBR4         |
| MITF  | VPS13D       |
| MITF  | VWA1         |
| MITF  | ZBTB17       |
| CEBPA | ABCB1        |
| CEBPA | B3GALT6      |
| CEBPA | APOC3        |
| CEBPA | C1orf174     |
| CEBPA | hsa-miR-1977 |
| CEBPA | ACOT7        |
| CEBPA | AGTRAP       |
| CEBPA | C1orf86      |
| CEBPA | AJAP1        |
| CEBPA | ACAP3        |
| CEBPA | AL356693.1   |
| CEBPA | ALB          |
| CEBPA | C1orf127     |
| CEBPA | CA6          |
| CEBPA | CAMTA1       |
| CEBPA | CCDC27       |
| CEBPA | CCNL2        |
| CEBPA | CEP104       |
| CEBPA | CFAP74       |
| CEBPA | CHD5         |
| CEBPA | CICP3        |
| CEBPA | CLSTN1       |
| CEBPA | CYP7A1       |
| CEBPA | DNAJC11      |
| CEBPA | DRAXIN       |
| CEBPA | ENO1         |

|       |              |
|-------|--------------|
| CEBPA | ERRFI1       |
| CEBPA | FBXO2        |
| CEBPA | G6PC         |
| CEBPA | GNB1         |
| CEBPA | GPR153       |
| CEBPA | GPR157       |
| CEBPA | H6PD         |
| CEBPA | HES2         |
| CEBPA | HES3         |
| CEBPA | HES4         |
| CEBPA | HMGN2P17     |
| CEBPA | IGF1         |
| CEBPA | KCNAB2       |
| CEBPA | KIF1B        |
| CEBPA | KLHL21       |
| CEBPA | LOC102724203 |
| CEBPA | LZIC         |
| CEBPA | MIIP         |
| CEBPA | MIR34A       |
| CEBPA | MTHFR        |
| CEBPA | MTOR         |
| CEBPA | NADK         |
| CEBPA | NPHP4        |
| CEBPA | NPPA-AS1     |
| CEBPA | PARK7        |
| CEBPA | PERM1        |
| CEBPA | PEX14        |
| CEBPA | PGD          |
| CEBPA | PIK3CD       |
| CEBPA | PLCH2        |
| CEBPA | PLOD1        |
| CEBPA | PPARG        |
| CEBPA | PRDM16       |

|       |            |
|-------|------------|
| CEBPA | PRKCZ      |
| CEBPA | RERE       |
| CEBPA | RNA5SP40   |
| CEBPA | RNU1-7P    |
| CEBPA | RNU6-1199P |
| CEBPA | RNU6-304P  |
| CEBPA | RNU6-991P  |
| CEBPA | SKI        |
| CEBPA | SLC25A33   |
| CEBPA | SLC2A5     |
| CEBPA | SLC2A7     |
| CEBPA | SLC35E2    |
| CEBPA | snoU13     |
| CEBPA | SPSB1      |
| CEBPA | SSU72      |
| CEBPA | TAS1R1     |
| CEBPA | TMEM201    |
| CEBPA | TMEM52     |
| CEBPA | TMEM88B    |
| CEBPA | TNFRSF1B   |
| CEBPA | TP73       |
| CEBPA | TTC34      |
| CEBPA | TTR        |
| CEBPA | UBE2J2     |
| CEBPA | UBE4B      |
| CEBPA | UBIAD1     |
| CEBPA | VAMP3      |
| CEBPA | VIP        |
| CEBPA | VPS13D     |
| SP1   | ADA        |
| SP1   | ACTC1      |
| SP1   | ALDOA      |
| SP1   | ACHE       |

|     |         |
|-----|---------|
| SP1 | AGTR1   |
| SP1 | ATF2    |
| SP1 | ACTA1   |
| SP1 | ATP1A3  |
| SP1 | BAX     |
| SP1 | COL1A2  |
| SP1 | DBH     |
| SP1 | DHFRP1  |
| Sp1 | DRD1    |
| SP1 | EGFR    |
| SP1 | FN1     |
| SP1 | HBEGF   |
| SP1 | HSPA1A  |
| SP1 | HTR1A   |
| SP1 | IL10    |
| SP1 | ITGAM   |
| SP1 | JUN     |
| SP1 | LCP1    |
| SP1 | LEP     |
| SP1 | MACROD1 |
| SP1 | MAML1   |
| SP1 | MAOA    |
| SP1 | MBP     |
| SP1 | MIP     |
| SP1 | MUC2    |
| SP1 | MUC5B   |
| SP1 | NCAM1   |
| SP1 | NPY     |
| SP1 | PLAUR   |
| SP1 | PROC    |
| SP1 | RB1     |
| SP1 | RB1CC1  |
| SP1 | SLC6A3  |

|      |         |
|------|---------|
| SP1  | SP3     |
| SP1  | SPARC   |
| SP1  | TPI1    |
| SP1  | UGDH    |
| SP1  | UGT1A6  |
| SP1  | UGT8    |
| SP1  | VEGFA   |
| SP1  | VIM     |
| RXRA | ADRB1   |
| RXRA | ALDH1A1 |
| RXRA | ABCC2   |
| RXRA | APOA1   |
| RXRA | APOC3   |
| RXRA | BTG2    |
| RXRA | CASP9   |
| RXRA | CDKN2D  |
| RXRA | CDX1    |
| RXRA | CEBPE   |
| RXRA | CRABP2  |
| RXRA | CRYAB   |
| RXRA | CYP26A1 |
| RXRA | EPO     |
| RXRA | ETS1    |
| RXRA | FGF8    |
| RXRA | FOXA1   |
| RXRA | HOXA1   |
| RXRA | HOXA4   |
| RXRA | HOXA7   |
| RXRA | HOXB1   |
| RXRA | HOXB4   |
| RXRA | HOXB5   |
| RXRA | HOXD4   |
| RXRA | KRT18   |



|      |         |
|------|---------|
| RXRA | MDK     |
| RXRA | MPO     |
| RXRA | NES     |
| RXRA | PCK1    |
| RXRA | PLAT    |
| RXRA | RARA    |
| RXRA | RARB    |
| RXRA | RARG    |
| RXRA | RARRES3 |
| RXRA | RBP1    |
| RXRA | RXRG    |
| RXRA | TLX2    |
| SPI1 | BCL6    |
| SPI1 | BPI     |
| SPI1 | CD209   |
| SPI1 | CD40    |
| SPI1 | CD68    |
| SPI1 | CSF1R   |
| SPI1 | CSF2RA  |
| SPI1 | CSF2RB  |
| SPI1 | CSF3R   |
| SPI1 | CTSG    |
| SPI1 | CTSS    |
| SPI1 | CYBB    |
| SPI1 | ELANE   |
| SPI1 | FCGR1A  |
| SPI1 | FES     |
| SPI1 | IGJ     |
| SPI1 | ITGAM   |
| SPI1 | MS4A1   |
| SPI1 | MSR1    |
| SPI1 | MYB     |
| SPI1 | NCF1    |

|       |          |
|-------|----------|
| SPI1  | NCF4     |
| SPI1  | NF1      |
| SPI1  | NR3C1    |
| SPI1  | PPBP     |
| SPI1  | PRTN3    |
| SPI1  | RNASE2   |
| SPI1  | SERPINB1 |
| SPI1  | TLR4     |
| SPI1  | VAV1     |
| HNF1A | AKR1C4   |
| HNF1A | ALDOB    |
| HNF1A | CYP7A1   |
| HNF1A | DDC      |
| HNF1A | G6PC     |
| HNF1A | GC       |
| HNF1A | HNF4A    |
| HNF1A | IGF1     |
| HNF1A | INS-IGF2 |
| HNF1A | LCT      |
| HNF1A | MIA2     |
| HNF1A | PAH      |
| HNF1A | PROC     |
| HNF1A | SLC2A2   |
| HNF1A | UGT1A6   |
| REST  | CARTPT   |
| REST  | CHRN2    |
| REST  | GLRA1    |
| REST  | HTR1A    |
| REST  | L1CAM    |
| REST  | SYN1     |
| REST  | TAC1     |
| REST  | TH       |
| REST  | VIP      |
