# Supplementary material
Source: PubMed Central journal article supplement (PMC8687357)
Supplement: SYB2-10-219-s006.pdf [file SYB2-10-219-s006.pdf]

**Table S7:** Robustness analysis results for selected network motifs <sup>a,b</sup>

| Motif                                                                               | Core network    | 5% removal                                | 5% addition                                |
|-------------------------------------------------------------------------------------|-----------------|-------------------------------------------|--------------------------------------------|
| 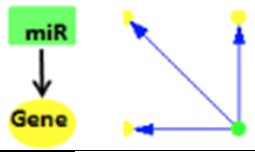   | Z score = 9.22  | Z score = 8.79 ± 0.41<br>(p-value = 0.22) | Z score = 7.23 ± 1.16<br>(p-value = 0.10)  |
|    | Z score = 9.22  | Z score = 7.06 ± 3.02<br>(p-value = 0.61) | Z score = 5.18 ± 3.06<br>(p-value = 0.19)  |
|    | Z score = 7.02  | Z score = 7.05 ± 3.05<br>(p-value = 0.34) | Z score = 6.03 ± 2.22<br>(p-value = 0.43)  |
|    | Z score = 2.52  | Z score = 2.67 ± 0.36<br>(p-value = 0.43) | Z score = 2.57 ± 0.43<br>(p-value = 0.85)  |
|   | Z score = 11.02 | Z score = 8.50 ± 4.17<br>(p-value = 0.32) | Z score = 10.10 ± 2.27<br>(p-value = 0.48) |
|  | Z score = 8.22  | Z score = 8.02 ± 0.60<br>(p-value = 0.56) | Z score = 6.83 ± 1.14<br>(p-value = 0.07)  |

<sup>a</sup>Z-scores were represented by mean ± standard error of mean (SEM).

<sup>b</sup>The statistical significance of z-scores (p-value) was exhibited using two-tailed Student's T-test.
