# Supplementary material
Source: PubMed Central journal article supplement (PMC8687357)
Supplement: SYB2-10-219-s007.pdf [file SYB2-10-219-s007.pdf]

**Table S8:** Pairwise interactions of the process-specific subnetworks (as represented in Figure 5)

|                 |             | METABOLIC PROCESS |             |       |                 |
|-----------------|-------------|-------------------|-------------|-------|-----------------|
| miRNA           | Target Gene | TF                | Target Gene | TF    | miRNA           |
| hsa-miR-30a-5p  | ABL1        | TP53              | ADARB1      | ASH1L | hsa-miR-103a-3p |
| hsa-miR-17-5p   | ADARB1      | ETS1              | ALDH4A1     | ASH1L | hsa-miR-16-5p   |
| hsa-miR-93-5p   | ADARB1      | HIF1A             | ARID1B      | ASH1L | hsa-miR-375     |
| hsa-miR-128-3p  | ALDH4A1     | TP53              | ASH1L       | CCND1 | hsa-miR-17-5p   |
| hsa-miR-204-5p  | ALPL        | SP1               | ATF2        | CCND1 | hsa-miR-17      |
| hsa-miR-520c-3p | APP         | TP53              | BTG2        | CCND1 | hsa-miR-20a     |
| hsa-miR-92a-3p  | ARID1B      | ETS1              | CAMTA1      | E2F1  | hsa-miR-106a-5p |
| hsa-miR-92b-3p  | ARID1B      | FOS               | CAMTA1      | E2F1  | hsa-miR-106b-5p |
| hsa-miR-103a-3p | ASH1L       | MITF              | CAMTA1      | E2F1  | hsa-miR-17-5p   |
| hsa-miR-16-5p   | ASH1L       | TP53              | CAPN2       | E2F1  | hsa-miR-20a-5p  |
| hsa-miR-19b-3p  | ATF2        | Ets1              | CTGF        | E2F1  | hsa-miR-330-3p  |
| hsa-miR-127-3p  | BCL6        | ETS1              | CTGF        | E2F1  | hsa-miR-93-5p   |
| hsa-miR-16-5p   | BTG2        | TP53              | DDAH1       | E2F1  | hsa-let-7a      |
| hsa-miR-129-5p  | CAMTA1      | TP53              | DDAH1       | E2F1  | hsa-let-7i      |
| hsa-miR-34a-5p  | CAMTA1      | HIF1A             | DNAJB9      | E2F1  | hsa-miR-106a    |
| hsa-miR-101-3p  | CAPN2       | HIF1A             | DPYSL2      | E2F1  | hsa-miR-106b    |
| hsa-miR-130b-3p | CBFB        | E2F1              | E2F1        | E2F1  | hsa-miR-106b    |
| hsa-miR-124-3p  | CBX2        | HIF1A             | EGFR        | E2F1  | hsa-miR-15a     |
| hsa-miR-17-5p   | CCND1       | SP1               | EGFR        | E2F1  | hsa-miR-15a     |
| hsa-miR-107     | CDK6        | SP1               | FN1         | E2F1  | hsa-miR-15b     |
| hsa-miR-137     | CDK6        | TP53              | GADD45A     | E2F1  | hsa-miR-15b     |
| hsa-miR-18a-5p  | CTGF        | TP53              | GADD45A     | E2F1  | hsa-miR-16      |
| hsa-miR-30b-5p  | DDAH1       | FOS               | GATAD2A     | E2F1  | hsa-miR-16-1    |
| hsa-miR-32-5p   | DNAJB9      | FOS               | GATAD2B     | E2F1  | hsa-miR-16-2    |
| hsa-miR-17-5p   | DPYSL2      | FOS               | GRK6        | E2F1  | hsa-miR-17      |
| hsa-miR-30c-5p  | DPYSL2      | FOS               | HBP1        | E2F1  | hsa-miR-17      |
| hsa-miR-106a-5p | E2F1        | STAT3             | IRF1        | E2F1  | hsa-miR-18a     |

|                 |         |
|-----------------|---------|
| hsa-miR-106b-5p | E2F1    |
| hsa-miR-17-5p   | E2F1    |
| hsa-miR-20a-5p  | E2F1    |
| hsa-miR-330-3p  | E2F1    |
| hsa-miR-93-5p   | E2F1    |
| hsa-miR-133a-3p | EGFR    |
| hsa-miR-133b    | EGFR    |
| hsa-miR-27a-3p  | EGFR    |
| hsa-miR-125b-5p | ETS1    |
| hsa-miR-155-5p  | ETS1    |
| hsa-miR-208a-3p | ETS1    |
| hsa-miR-129-5p  | ETV6    |
| hsa-miR-200b-3p | FN1     |
| hsa-miR-200c-3p | FN1     |
| hsa-miR-374a-5p | GADD45A |
| hsa-miR-16-5p   | GATAD2A |
| hsa-miR-590-3p  | GATAD2B |
| hsa-miR-19a-3p  | GRK6    |
| hsa-miR-17-5p   | HBP1    |
| hsa-miR-19b-3p  | HBP1    |
| hsa-miR-29a-3p  | HBP1    |
| hsa-miR-196a-5p | HOXA7   |
| hsa-miR-383-5p  | IRF1    |
| hsa-miR-93-5p   | IRF1    |
| hsa-miR-106b-5p | JAK1    |
| hsa-miR-17-5p   | JAK1    |
| hsa-miR-221-3p  | KIT     |
| hsa-miR-222-3p  | KIT     |
| hsa-miR-19b-3p  | KLF10   |
| hsa-miR-30b-5p  | KLF10   |
| hsa-miR-141-3p  | KLF11   |

|       |        |
|-------|--------|
| TP53  | JAK1   |
| FOS   | MTMR12 |
| FOS   | MTMR4  |
| ETS1  | MTOR   |
| FOS   | MTOR   |
| MITF  | MTOR   |
| FOS   | MXD4   |
| E2F1  | MYB    |
| E2F1  | MYC    |
| HIF1A | NAA30  |
| FOS   | NLK    |
| TP53  | NOTCH2 |
| TP53  | NOTCH2 |
| TP53  | OSBPL9 |
| HIF1A | PCBP1  |
| HIF1A | PCMTD1 |
| HIF1A | PDE4D  |
| HIF1A | PFKFB3 |
| ETS1  | PIK3CD |
| MITF  | PIK3CD |
| TP53  | PKN2   |
| TP53  | PKN2   |
| HIF1A | PLOD2  |
| HIF1A | PPID   |
| HIF1A | PRDM1  |
| MITF  | PRDM16 |
| HIF1A | PRKAB2 |
| TP53  | PTPRF  |
| TP53  | PTPRF  |
| HIF1A | PXDN   |
| HIF1A | RAD23B |

|      |                 |
|------|-----------------|
| E2F1 | hsa-miR-18b     |
| E2F1 | hsa-miR-195     |
| E2F1 | hsa-miR-19a     |
| E2F1 | hsa-miR-19b     |
| E2F1 | hsa-miR-19b-2   |
| E2F1 | hsa-miR-20a     |
| E2F1 | hsa-miR-20b     |
| E2F1 | hsa-miR-223     |
| E2F1 | hsa-miR-25      |
| E2F1 | hsa-miR-363     |
| E2F1 | hsa-miR-449a    |
| E2F1 | hsa-miR-449a    |
| E2F1 | hsa-miR-449b    |
| E2F1 | hsa-miR-449b    |
| E2F1 | hsa-miR-449c    |
| E2F1 | hsa-miR-92a     |
| E2F1 | hsa-miR-92a-2   |
| E2F1 | hsa-miR-93      |
| EGFR | hsa-miR-133a-3p |
| EGFR | hsa-miR-133b    |
| EGFR | hsa-miR-27a-3p  |
| EGFR | hsa-miR-21      |
| ETS1 | hsa-miR-125b-5p |
| ETS1 | hsa-miR-155-5p  |
| ETS1 | hsa-miR-208a-3p |
| ETS1 | hsa-miR-146a    |
| ETS1 | hsa-miR-222     |
| IRF1 | hsa-miR-383-5p  |
| IRF1 | hsa-miR-93-5p   |
| IRF1 | hsa-miR-155     |
| MITF | hsa-miR-137     |

|                 |         |
|-----------------|---------|
| hsa-miR-200a-3p | KLF11   |
| hsa-miR-93-5p   | KLF11   |
| hsa-miR-9-5p    | LDLRAP1 |
| hsa-miR-370-3p  | MAP3K8  |
| hsa-miR-23b-3p  | MCFD2   |
| hsa-miR-93-5p   | MED12L  |
| hsa-miR-137     | MITF    |
| hsa-miR-182-5p  | MITF    |
| hsa-miR-1       | MTMR12  |
| hsa-miR-181a-5p | MTMR12  |
| hsa-miR-103a-3p | MTMR4   |
| hsa-miR-100-5p  | MTOR    |
| hsa-miR-99a-5p  | MTOR    |
| hsa-miR-99b-5p  | MTOR    |
| hsa-miR-1       | MXD4    |
| hsa-miR-150-5p  | MYB     |
| hsa-miR-34c-5p  | MYC     |
| hsa-miR-130b-3p | NAA30   |
| hsa-miR-93-5p   | NAA30   |
| hsa-miR-30c-5p  | NEDD4   |
| hsa-miR-101-3p  | NEK7    |
| hsa-miR-340-5p  | NEK7    |
| hsa-miR-92b-3p  | NLK     |
| hsa-miR-181a-5p | NOTCH2  |
| hsa-miR-181c-5p | NOTCH2  |
| hsa-miR-18a-5p  | NR3C1   |
| hsa-miR-135a-5p | NR3C2   |
| hsa-miR-19b-3p  | NR3C2   |
| hsa-miR-9-5p    | ONECUT2 |
| hsa-miR-16-5p   | OSBPL3  |
| hsa-miR-125a-5p | OSBPL9  |

|       |          |
|-------|----------|
| SP1   | RB1      |
| ETS1  | RERE     |
| HIF1A | RERE     |
| MITF  | RERE     |
| HIF1A | RLF      |
| HIF1A | RRM2     |
| TP53  | RUNX3    |
| TP53  | RUNX3    |
| FOS   | SERTAD2  |
| TP53  | SMG7     |
| TP53  | SMG7     |
| HIF1A | SOCS6    |
| FOS   | SP1      |
| SP1   | SP3      |
| HIF1A | STAMPB   |
| FOS   | STK40    |
| FOS   | STT3A    |
| FOS   | SUV420H2 |
| TP53  | TARBP1   |
| ETS1  | TARDBP   |
| HIF1A | TLE4     |
| TP53  | TRIM33   |
| TP53  | TRIM33   |
| HIF1A | UGP2     |
| ETS1  | USP48    |
| HIF1A | VEGFA    |
| HIF1A | VEGFA    |
| SP1   | VEGFA    |
| HIF1A | ZBTB10   |
| FOS   | ZBTB5    |
| HIF1A | ZNF148   |

|      |                |
|------|----------------|
| MITF | hsa-miR-182-5p |
| MITF | hsa-miR-211    |
| MYB  | hsa-miR-150-5p |
| MYB  | hsa-miR-148a   |
| MYB  | hsa-miR-155    |
| MYC  | hsa-miR-34c-5p |
| MYC  | hsa-let-7      |
| MYC  | hsa-let-7a     |
| MYC  | hsa-let-7a-1   |
| MYC  | hsa-let-7b     |
| MYC  | hsa-let-7c     |
| MYC  | hsa-let-7d     |
| MYC  | hsa-let-7d     |
| MYC  | hsa-let-7e     |
| MYC  | hsa-let-7f     |
| MYC  | hsa-let-7f-1   |
| MYC  | hsa-let-7g     |
| MYC  | hsa-let-7i     |
| MYC  | hsa-miR-106a   |
| MYC  | hsa-miR-106a   |
| MYC  | hsa-miR-106b   |
| MYC  | hsa-miR-141    |
| MYC  | hsa-miR-15a    |
| MYC  | hsa-miR-16-1   |
| MYC  | hsa-miR-17     |
| MYC  | hsa-miR-18a    |
| MYC  | hsa-miR-195    |
| MYC  | hsa-miR-19a    |

|                 |        |
|-----------------|--------|
| hsa-miR-21-5p   | PAN3   |
| hsa-miR-21-5p   | PCBP1  |
| hsa-miR-92a-3p  | PCMTD1 |
| hsa-miR-92b-3p  | PCMTD1 |
| hsa-miR-23b-3p  | PCMTD2 |
| hsa-miR-16-5p   | PDE3B  |
| hsa-miR-93-5p   | PDE3B  |
| hsa-miR-18a-5p  | PDE4D  |
| hsa-miR-375     | PDK1   |
| hsa-miR-26b-5p  | PFKFB3 |
| hsa-miR-30a-5p  | PIK3CD |
| hsa-miR-155-5p  | PKN2   |
| hsa-miR-181a-5p | PLCL2  |
| hsa-miR-26b-5p  | PLOD2  |
| hsa-miR-130a-3p | PPARG  |
| hsa-miR-130b-3p | PPARG  |
| hsa-miR-27b-3p  | PPARG  |
| hsa-miR-30a-5p  | PPID   |
| hsa-miR-377-3p  | PPM1A  |
| hsa-miR-30a-5p  | PRDM1  |
| hsa-miR-9-5p    | PRDM1  |
| hsa-miR-96-5p   | PRDM16 |
| hsa-miR-103a-3p | PRKAB2 |
| hsa-miR-130b-3p | PRUNE2 |
| hsa-miR-19b-3p  | PRUNE2 |
| hsa-miR-24-3p   | PTPRF  |
| hsa-miR-133b    | PTPRK  |
| hsa-miR-29a-3p  | PXDN   |
| hsa-miR-9-5p    | PXDN   |
| hsa-miR-30a-5p  | RAD23B |
| hsa-miR-138-5p  | RARA   |

|       |                 |
|-------|-----------------|
| MYC   | hsa-miR-19a     |
| MYC   | hsa-miR-19b     |
| MYC   | hsa-miR-19b     |
| MYC   | hsa-miR-20a     |
| MYC   | hsa-miR-20a     |
| MYC   | hsa-miR-20b     |
| MYC   | hsa-miR-22      |
| MYC   | hsa-miR-221     |
| MYC   | hsa-miR-23a     |
| MYC   | hsa-miR-23b     |
| MYC   | hsa-miR-26a     |
| MYC   | hsa-miR-26a     |
| MYC   | hsa-miR-26b     |
| MYC   | hsa-miR-29a     |
| MYC   | hsa-miR-29b     |
| MYC   | hsa-miR-29c     |
| MYC   | hsa-miR-34a     |
| MYC   | hsa-miR-9       |
| MYC   | hsa-miR-92a     |
| MYC   | hsa-miR-93      |
| PPARG | hsa-miR-130a-3p |
| PPARG | hsa-miR-130b-3p |
| PPARG | hsa-miR-27b-3p  |
| SP1   | hsa-miR-124-3p  |
| SP1   | hsa-miR-106a    |
| SP1   | hsa-miR-132     |
| SP1   | hsa-miR-34c     |
| SP1   | hsa-miR-365     |
| TP53  | hsa-miR-125a-5p |
| TP53  | hsa-miR-485-5p  |
| TP53  | hsa-miR-107     |

|                 |          |
|-----------------|----------|
| hsa-miR-218-5p  | RARA     |
| hsa-miR-106a-5p | RB1      |
| hsa-miR-106b-5p | RB1      |
| hsa-miR-17-5p   | RB1      |
| hsa-miR-192-5p  | RB1      |
| hsa-miR-20a-5p  | RB1      |
| hsa-miR-215-5p  | RB1      |
| hsa-miR-93-5p   | RB1      |
| hsa-miR-429     | RERE     |
| hsa-miR-181a-5p | RLF      |
| hsa-miR-106b-5p | RORA     |
| hsa-miR-342-3p  | RRM2     |
| hsa-miR-130a-3p | RUNX3    |
| hsa-miR-130b-3p | RUNX3    |
| hsa-miR-301a-3p | RUNX3    |
| hsa-miR-532-5p  | RUNX3    |
| hsa-miR-145-5p  | SERINC5  |
| hsa-miR-124-3p  | SERTAD2  |
| hsa-miR-93-5p   | SERTAD2  |
| hsa-miR-185-5p  | SMG7     |
| hsa-miR-23b-3p  | SOCS6    |
| hsa-miR-124-3p  | SP1      |
| hsa-miR-223-3p  | SP3      |
| hsa-miR-101-3p  | STAMPB   |
| hsa-let-7d-5p   | STK40    |
| hsa-miR-124-3p  | STT3A    |
| hsa-miR-29a-3p  | SUV420H2 |
| hsa-miR-29c-3p  | SUV420H2 |
| hsa-miR-19b-3p  | TAF4     |
| hsa-miR-124-3p  | TARBP1   |
| hsa-miR-186-5p  | TARDBP   |

|      |              |
|------|--------------|
| TP53 | hsa-miR-107  |
| TP53 | hsa-miR-125b |
| TP53 | hsa-miR-143  |
| TP53 | hsa-miR-145  |
| TP53 | hsa-miR-145  |
| TP53 | hsa-miR-155  |
| TP53 | hsa-miR-192  |
| TP53 | hsa-miR-192  |
| TP53 | hsa-miR-192  |
| TP53 | hsa-miR-194  |
| TP53 | hsa-miR-200a |
| TP53 | hsa-miR-200b |
| TP53 | hsa-miR-200c |
| TP53 | hsa-miR-215  |
| TP53 | hsa-miR-29   |
| TP53 | hsa-miR-34a  |
| TP53 | hsa-miR-34b  |
| TP53 | hsa-miR-34b  |
| TP53 | hsa-miR-34b  |
| TP53 | hsa-miR-34c  |
| TP53 | hsa-miR-34c  |
| TP53 | hsa-miR-34c  |
| TP53 | hsa-miR-519d |

|                 |        |
|-----------------|--------|
| hsa-miR-424-5p  | TBPL1  |
| hsa-miR-155-5p  | TLE4   |
| hsa-miR-16-5p   | TLE4   |
| hsa-miR-125a-5p | TP53   |
| hsa-miR-485-5p  | TP53   |
| hsa-miR-19b-3p  | TRIM33 |
| hsa-miR-32-5p   | TRIO   |
| hsa-miR-128-3p  | UBE2W  |
| hsa-miR-34a-5p  | UBP1   |
| hsa-miR-32-5p   | UGP2   |
| hsa-miR-148b-3p | USP48  |
| hsa-miR-140-5p  | VEGFA  |
| hsa-miR-15a-5p  | VEGFA  |
| hsa-miR-15b-5p  | VEGFA  |
| hsa-miR-16-5p   | VEGFA  |
| hsa-miR-195-5p  | VEGFA  |
| hsa-miR-200b-3p | VEGFA  |
| hsa-miR-200c-3p | VEGFA  |
| hsa-miR-29b-3p  | VEGFA  |
| hsa-miR-29c-3p  | VEGFA  |
| hsa-miR-361-5p  | VEGFA  |
| hsa-miR-383-5p  | VEGFA  |
| hsa-miR-29c-3p  | ZBTB10 |
| hsa-miR-193b-3p | ZBTB5  |
| hsa-miR-93-5p   | ZNF148 |

**REGULATION OF TRANSCRIPTION**

| <b>miRNA</b>    | <b>Target Gene</b> |
|-----------------|--------------------|
| hsa-miR-30a-5p  | ABL1               |
| hsa-miR-520c-3p | APP                |
| hsa-miR-92a-3p  | ARID1B             |
| hsa-miR-92b-3p  | ARID1B             |

| <b>TF</b> | <b>Target Gene</b> |
|-----------|--------------------|
| HIF1A     | ARID1B             |
| TP53      | ASH1L              |
| SP1       | ATF2               |
| TP53      | BTG2               |

| <b>TF</b> | <b>miRNA</b>    |
|-----------|-----------------|
| ASH1L     | hsa-miR-103a-3p |
| ASH1L     | hsa-miR-16-5p   |
| ASH1L     | hsa-miR-375     |
| E2F1      | hsa-miR-106a-5p |

|                 |         |
|-----------------|---------|
| hsa-miR-103a-3p | ASH1L   |
| hsa-miR-16-5p   | ASH1L   |
| hsa-miR-19b-3p  | ATF2    |
| hsa-miR-127-3p  | BCL6    |
| hsa-miR-16-5p   | BTG2    |
| hsa-miR-129-5p  | CAMTA1  |
| hsa-miR-34a-5p  | CAMTA1  |
| hsa-miR-130b-3p | CBFB    |
| hsa-miR-124-3p  | CBX2    |
| hsa-miR-107     | CCNE1   |
| hsa-miR-15a-5p  | CCNE1   |
| hsa-miR-15b-5p  | CCNE1   |
| hsa-miR-16-5p   | CCNE1   |
| hsa-miR-195-5p  | CCNE1   |
| hsa-miR-424-5p  | CCNE1   |
| hsa-miR-106a-5p | E2F1    |
| hsa-miR-106b-5p | E2F1    |
| hsa-miR-17-5p   | E2F1    |
| hsa-miR-20a-5p  | E2F1    |
| hsa-miR-330-3p  | E2F1    |
| hsa-miR-93-5p   | E2F1    |
| hsa-miR-125b-5p | ETS1    |
| hsa-miR-155-5p  | ETS1    |
| hsa-miR-208a-3p | ETS1    |
| hsa-miR-129-5p  | ETV6    |
| hsa-miR-16-5p   | GATAD2A |
| hsa-miR-590-3p  | GATAD2B |
| hsa-miR-17-5p   | HBP1    |
| hsa-miR-19b-3p  | HBP1    |
| hsa-miR-29a-3p  | HBP1    |
| hsa-miR-196a-5p | HOXA7   |

|       |          |
|-------|----------|
| ETS1  | CAMTA1   |
| FOS   | CAMTA1   |
| MITF  | CAMTA1   |
| E2F1  | CCNE1    |
| E2F1  | E2F1     |
| FOS   | GATAD2A  |
| FOS   | GATAD2B  |
| FOS   | HBP1     |
| STAT3 | IRF1     |
| TP53  | MDM4     |
| FOS   | MXD4     |
| E2F1  | MYB      |
| E2F1  | MYC      |
| FOS   | NLK      |
| TP53  | NOTCH2   |
| TP53  | NOTCH2   |
| TP53  | POGZ     |
| HIF1A | PRDM1    |
| MITF  | PRDM16   |
| SP1   | RB1      |
| ETS1  | RERE     |
| HIF1A | RERE     |
| MITF  | RERE     |
| HIF1A | RLF      |
| TP53  | RUNX3    |
| TP53  | RUNX3    |
| FOS   | SERTAD2  |
| FOS   | SP1      |
| SP1   | SP3      |
| FOS   | SUV420H2 |
| TP53  | TARBP1   |

|      |                 |
|------|-----------------|
| E2F1 | hsa-miR-106b-5p |
| E2F1 | hsa-miR-17-5p   |
| E2F1 | hsa-miR-20a-5p  |
| E2F1 | hsa-miR-330-3p  |
| E2F1 | hsa-miR-93-5p   |
| E2F1 | hsa-let-7a      |
| E2F1 | hsa-let-7i      |
| E2F1 | hsa-miR-106a    |
| E2F1 | hsa-miR-106b    |
| E2F1 | hsa-miR-106b    |
| E2F1 | hsa-miR-15a     |
| E2F1 | hsa-miR-15a     |
| E2F1 | hsa-miR-15b     |
| E2F1 | hsa-miR-15b     |
| E2F1 | hsa-miR-16      |
| E2F1 | hsa-miR-16-1    |
| E2F1 | hsa-miR-16-2    |
| E2F1 | hsa-miR-17      |
| E2F1 | hsa-miR-17      |
| E2F1 | hsa-miR-18a     |
| E2F1 | hsa-miR-18b     |
| E2F1 | hsa-miR-195     |
| E2F1 | hsa-miR-19a     |
| E2F1 | hsa-miR-19b     |
| E2F1 | hsa-miR-19b-2   |
| E2F1 | hsa-miR-20a     |
| E2F1 | hsa-miR-20b     |
| E2F1 | hsa-miR-223     |
| E2F1 | hsa-miR-25      |
| E2F1 | hsa-miR-363     |
| E2F1 | hsa-miR-449a    |

|                 |         |
|-----------------|---------|
| hsa-miR-383-5p  | IRF1    |
| hsa-miR-93-5p   | IRF1    |
| hsa-miR-19b-3p  | KLF10   |
| hsa-miR-30b-5p  | KLF10   |
| hsa-miR-141-3p  | KLF11   |
| hsa-miR-200a-3p | KLF11   |
| hsa-miR-93-5p   | KLF11   |
| hsa-miR-34a-5p  | MDM4    |
| hsa-miR-93-5p   | MED12L  |
| hsa-miR-137     | MITF    |
| hsa-miR-182-5p  | MITF    |
| hsa-miR-26a-5p  | MTDH    |
| hsa-miR-30a-5p  | MTDH    |
| hsa-miR-30c-5p  | MTDH    |
| hsa-miR-1       | MXD4    |
| hsa-miR-150-5p  | MYB     |
| hsa-miR-34c-5p  | MYC     |
| hsa-miR-30c-5p  | NEDD4   |
| hsa-miR-92b-3p  | NLK     |
| hsa-miR-181a-5p | NOTCH2  |
| hsa-miR-181c-5p | NOTCH2  |
| hsa-miR-18a-5p  | NR3C1   |
| hsa-miR-135a-5p | NR3C2   |
| hsa-miR-19b-3p  | NR3C2   |
| hsa-miR-9-5p    | ONECUT2 |
| hsa-miR-221-3p  | POGZ    |
| hsa-miR-34a-5p  | POGZ    |
| hsa-miR-130a-3p | PPARG   |
| hsa-miR-130b-3p | PPARG   |
| hsa-miR-27b-3p  | PPARG   |
| hsa-miR-377-3p  | PPM1A   |

|       |        |
|-------|--------|
| ETS1  | TARDBP |
| HIF1A | TLE4   |
| TP53  | TRIM33 |
| TP53  | TRIM33 |
| HIF1A | VEGFA  |
| HIF1A | VEGFA  |
| SP1   | VEGFA  |
| HIF1A | ZBTB10 |
| FOS   | ZBTB5  |
| HIF1A | ZNF148 |

|      |                 |
|------|-----------------|
| E2F1 | hsa-miR-449a    |
| E2F1 | hsa-miR-449b    |
| E2F1 | hsa-miR-449b    |
| E2F1 | hsa-miR-449c    |
| E2F1 | hsa-miR-92a     |
| E2F1 | hsa-miR-92a-2   |
| E2F1 | hsa-miR-93      |
| ETS1 | hsa-miR-125b-5p |
| ETS1 | hsa-miR-155-5p  |
| ETS1 | hsa-miR-208a-3p |
| ETS1 | hsa-miR-146a    |
| ETS1 | hsa-miR-222     |
| IRF1 | hsa-miR-383-5p  |
| IRF1 | hsa-miR-93-5p   |
| IRF1 | hsa-miR-155     |
| MITF | hsa-miR-137     |
| MITF | hsa-miR-182-5p  |
| MITF | hsa-miR-211     |
| MYB  | hsa-miR-150-5p  |
| MYB  | hsa-miR-148a    |
| MYB  | hsa-miR-155     |
| MYC  | hsa-miR-34c-5p  |
| MYC  | hsa-let-7       |
| MYC  | hsa-let-7a      |
| MYC  | hsa-let-7a-1    |
| MYC  | hsa-let-7b      |
| MYC  | hsa-let-7c      |
| MYC  | hsa-let-7d      |
| MYC  | hsa-let-7d      |
| MYC  | hsa-let-7e      |
| MYC  | hsa-let-7f      |



|                 |          |
|-----------------|----------|
| hsa-miR-30a-5p  | PRDM1    |
| hsa-miR-9-5p    | PRDM1    |
| hsa-miR-96-5p   | PRDM16   |
| hsa-miR-133b    | PTPRK    |
| hsa-miR-138-5p  | RARA     |
| hsa-miR-218-5p  | RARA     |
| hsa-miR-106a-5p | RB1      |
| hsa-miR-106b-5p | RB1      |
| hsa-miR-17-5p   | RB1      |
| hsa-miR-192-5p  | RB1      |
| hsa-miR-20a-5p  | RB1      |
| hsa-miR-215-5p  | RB1      |
| hsa-miR-93-5p   | RB1      |
| hsa-miR-429     | RECE     |
| hsa-miR-181a-5p | RLF      |
| hsa-miR-106b-5p | RORA     |
| hsa-miR-130a-3p | RUNX3    |
| hsa-miR-130b-3p | RUNX3    |
| hsa-miR-301a-3p | RUNX3    |
| hsa-miR-532-5p  | RUNX3    |
| hsa-miR-124-3p  | SERTAD2  |
| hsa-miR-93-5p   | SERTAD2  |
| hsa-miR-124-3p  | SP1      |
| hsa-miR-223-3p  | SP3      |
| hsa-miR-29a-3p  | SUV420H2 |
| hsa-miR-29c-3p  | SUV420H2 |
| hsa-miR-19b-3p  | TAF4     |
| hsa-miR-124-3p  | TARBP1   |
| hsa-miR-186-5p  | TARDBP   |
| hsa-miR-424-5p  | TBPL1    |
| hsa-miR-155-5p  | TLE4     |

|     |              |
|-----|--------------|
| MYC | hsa-let-7f-1 |
| MYC | hsa-let-7g   |
| MYC | hsa-let-7i   |
| MYC | hsa-miR-106a |
| MYC | hsa-miR-106a |
| MYC | hsa-miR-106b |
| MYC | hsa-miR-141  |
| MYC | hsa-miR-15a  |
| MYC | hsa-miR-16-1 |
| MYC | hsa-miR-17   |
| MYC | hsa-miR-18a  |
| MYC | hsa-miR-195  |
| MYC | hsa-miR-19a  |
| MYC | hsa-miR-19a  |
| MYC | hsa-miR-19b  |
| MYC | hsa-miR-19b  |
| MYC | hsa-miR-20a  |
| MYC | hsa-miR-20a  |
| MYC | hsa-miR-20b  |
| MYC | hsa-miR-22   |
| MYC | hsa-miR-221  |
| MYC | hsa-miR-23a  |
| MYC | hsa-miR-23b  |
| MYC | hsa-miR-26a  |
| MYC | hsa-miR-26a  |
| MYC | hsa-miR-26b  |
| MYC | hsa-miR-29a  |
| MYC | hsa-miR-29b  |

|                 |        |
|-----------------|--------|
| hsa-miR-16-5p   | TLE4   |
| hsa-miR-125a-5p | TP53   |
| hsa-miR-485-5p  | TP53   |
| hsa-miR-19b-3p  | TRIM33 |
| hsa-miR-34a-5p  | UBP1   |
| hsa-miR-140-5p  | VEGFA  |
| hsa-miR-15a-5p  | VEGFA  |
| hsa-miR-15b-5p  | VEGFA  |
| hsa-miR-16-5p   | VEGFA  |
| hsa-miR-195-5p  | VEGFA  |
| hsa-miR-200b-3p | VEGFA  |
| hsa-miR-200c-3p | VEGFA  |
| hsa-miR-29b-3p  | VEGFA  |
| hsa-miR-29c-3p  | VEGFA  |
| hsa-miR-361-5p  | VEGFA  |
| hsa-miR-383-5p  | VEGFA  |
| hsa-miR-29c-3p  | ZBTB10 |
| hsa-miR-193b-3p | ZBTB5  |
| hsa-miR-93-5p   | ZNF148 |

|       |                 |
|-------|-----------------|
| MYC   | hsa-miR-29c     |
| MYC   | hsa-miR-34a     |
| MYC   | hsa-miR-9       |
| MYC   | hsa-miR-92a     |
| MYC   | hsa-miR-93      |
| PPARG | hsa-miR-130a-3p |
| PPARG | hsa-miR-130b-3p |
| PPARG | hsa-miR-27b-3p  |
| SP1   | hsa-miR-124-3p  |
| SP1   | hsa-miR-106a    |
| SP1   | hsa-miR-132     |
| SP1   | hsa-miR-34c     |
| SP1   | hsa-miR-365     |
| TP53  | hsa-miR-125a-5p |
| TP53  | hsa-miR-485-5p  |
| TP53  | hsa-miR-107     |
| TP53  | hsa-miR-107     |
| TP53  | hsa-miR-125b    |
| TP53  | hsa-miR-143     |
| TP53  | hsa-miR-145     |
| TP53  | hsa-miR-145     |
| TP53  | hsa-miR-155     |
| TP53  | hsa-miR-192     |
| TP53  | hsa-miR-192     |
| TP53  | hsa-miR-192     |
| TP53  | hsa-miR-194     |
| TP53  | hsa-miR-200a    |
| TP53  | hsa-miR-200b    |
| TP53  | hsa-miR-200c    |
| TP53  | hsa-miR-215     |
| TP53  | hsa-miR-29      |

|      |              |
|------|--------------|
| TP53 | hsa-miR-34a  |
| TP53 | hsa-miR-34b  |
| TP53 | hsa-miR-34b  |
| TP53 | hsa-miR-34c  |
| TP53 | hsa-miR-34c  |
| TP53 | hsa-miR-34c  |
| TP53 | hsa-miR-519d |

**CELL DEATH**

| <b>miRNA</b>    | <b>Target Gene</b> |
|-----------------|--------------------|
| hsa-miR-520c-3p | APP                |
| hsa-miR-106a-5p | E2F1               |
| hsa-miR-106b-5p | E2F1               |
| hsa-miR-17-5p   | E2F1               |
| hsa-miR-20a-5p  | E2F1               |
| hsa-miR-330-3p  | E2F1               |
| hsa-miR-93-5p   | E2F1               |
| hsa-miR-133b    | FAIM               |
| hsa-miR-374a-5p | GADD45A            |
| hsa-miR-221-3p  | KIT                |
| hsa-miR-222-3p  | KIT                |
| hsa-miR-141-3p  | KLF11              |
| hsa-miR-200a-3p | KLF11              |
| hsa-miR-93-5p   | KLF11              |
| hsa-miR-34a-5p  | MDM4               |
| hsa-miR-34c-5p  | MYC                |

| <b>TF</b> | <b>Target Gene</b> |
|-----------|--------------------|
| E2F1      | E2F1               |
| TP53      | GADD45A            |
| TP53      | GADD45A            |
| TP53      | MDM4               |
| E2F1      | MYC                |
| HIF1A     | SLC11A2            |
| ETS1      | TARDBP             |

| <b>TF</b> | <b>miRNA</b>    |
|-----------|-----------------|
| E2F1      | hsa-miR-106a-5p |
| E2F1      | hsa-miR-106b-5p |
| E2F1      | hsa-miR-17-5p   |
| E2F1      | hsa-miR-20a-5p  |
| E2F1      | hsa-miR-330-3p  |
| E2F1      | hsa-miR-93-5p   |
| E2F1      | hsa-let-7a      |
| E2F1      | hsa-let-7i      |
| E2F1      | hsa-miR-106a    |
| E2F1      | hsa-miR-106b    |
| E2F1      | hsa-miR-106b    |
| E2F1      | hsa-miR-15a     |
| E2F1      | hsa-miR-15a     |
| E2F1      | hsa-miR-15b     |
| E2F1      | hsa-miR-15b     |
| E2F1      | hsa-miR-16      |

|                 |         |
|-----------------|---------|
| hsa-miR-130b-3p | PRUNE2  |
| hsa-miR-19b-3p  | PRUNE2  |
| hsa-miR-16-5p   | SLC11A2 |
| hsa-miR-186-5p  | TARDBP  |
| hsa-miR-125a-5p | TP53    |
| hsa-miR-485-5p  | TP53    |
| hsa-miR-32-5p   | TRIO    |

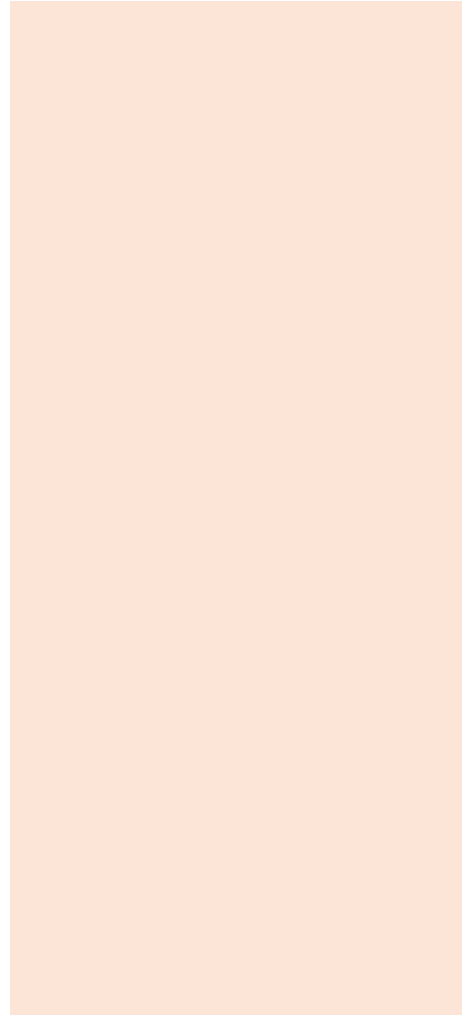

|      |                |
|------|----------------|
| E2F1 | hsa-miR-16-1   |
| E2F1 | hsa-miR-16-2   |
| E2F1 | hsa-miR-17     |
| E2F1 | hsa-miR-17     |
| E2F1 | hsa-miR-18a    |
| E2F1 | hsa-miR-18b    |
| E2F1 | hsa-miR-195    |
| E2F1 | hsa-miR-19a    |
| E2F1 | hsa-miR-19b    |
| E2F1 | hsa-miR-19b-2  |
| E2F1 | hsa-miR-20a    |
| E2F1 | hsa-miR-20b    |
| E2F1 | hsa-miR-223    |
| E2F1 | hsa-miR-25     |
| E2F1 | hsa-miR-363    |
| E2F1 | hsa-miR-449a   |
| E2F1 | hsa-miR-449a   |
| E2F1 | hsa-miR-449b   |
| E2F1 | hsa-miR-449b   |
| E2F1 | hsa-miR-449c   |
| E2F1 | hsa-miR-92a    |
| E2F1 | hsa-miR-92a-2  |
| E2F1 | hsa-miR-93     |
| MYC  | hsa-miR-34c-5p |
| MYC  | hsa-let-7      |
| MYC  | hsa-let-7a     |
| MYC  | hsa-let-7a-1   |
| MYC  | hsa-let-7b     |
| MYC  | hsa-let-7c     |
| MYC  | hsa-let-7d     |
| MYC  | hsa-let-7d     |

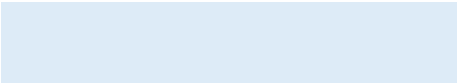

|     |              |
|-----|--------------|
| MYC | hsa-let-7e   |
| MYC | hsa-let-7f   |
| MYC | hsa-let-7f-1 |
| MYC | hsa-let-7g   |
| MYC | hsa-let-7i   |
| MYC | hsa-miR-106a |
| MYC | hsa-miR-106a |
| MYC | hsa-miR-106b |
| MYC | hsa-miR-141  |
| MYC | hsa-miR-15a  |
| MYC | hsa-miR-16-1 |
| MYC | hsa-miR-17   |
| MYC | hsa-miR-18a  |
| MYC | hsa-miR-195  |
| MYC | hsa-miR-19a  |
| MYC | hsa-miR-19a  |
| MYC | hsa-miR-19b  |
| MYC | hsa-miR-19b  |
| MYC | hsa-miR-20a  |
| MYC | hsa-miR-20a  |
| MYC | hsa-miR-20b  |
| MYC | hsa-miR-22   |
| MYC | hsa-miR-221  |
| MYC | hsa-miR-23a  |
| MYC | hsa-miR-23b  |
| MYC | hsa-miR-26a  |
| MYC | hsa-miR-26a  |
| MYC | hsa-miR-26b  |



|      |              |
|------|--------------|
| TP53 | hsa-miR-34a  |
| TP53 | hsa-miR-34b  |
| TP53 | hsa-miR-34b  |
| TP53 | hsa-miR-34c  |
| TP53 | hsa-miR-34c  |
| TP53 | hsa-miR-34c  |
| TP53 | hsa-miR-519d |

**CELL CYCLE**

| <b>miRNA</b>    | <b>Target Gene</b> |
|-----------------|--------------------|
| hsa-miR-30a-5p  | ABL1               |
| hsa-miR-520c-3p | APP                |
| hsa-miR-17-5p   | CCND1              |
| hsa-miR-107     | CCNE1              |
| hsa-miR-15a-5p  | CCNE1              |
| hsa-miR-15b-5p  | CCNE1              |
| hsa-miR-16-5p   | CCNE1              |
| hsa-miR-195-5p  | CCNE1              |
| hsa-miR-424-5p  | CCNE1              |
| hsa-miR-93-5p   | CCNG2              |
| hsa-miR-107     | CDK6               |
| hsa-miR-137     | CDK6               |
| hsa-miR-106a-5p | E2F1               |
| hsa-miR-106b-5p | E2F1               |
| hsa-miR-17-5p   | E2F1               |
| hsa-miR-20a-5p  | E2F1               |
| hsa-miR-330-3p  | E2F1               |
| hsa-miR-93-5p   | E2F1               |
| hsa-miR-133a-3p | EGFR               |
| hsa-miR-133b    | EGFR               |
| hsa-miR-27a-3p  | EGFR               |
| hsa-miR-374a-5p | GADD45A            |

| <b>TF</b> | <b>Target Gene</b> |
|-----------|--------------------|
| E2F1      | CCNE1              |
| HIF1A     | CCNG2              |
| E2F1      | E2F1               |
| HIF1A     | EGFR               |
| SP1       | EGFR               |
| TP53      | GADD45A            |
| TP53      | GADD45A            |
| FOS       | HBP1               |
| TP53      | MDM4               |
| ETS1      | MFN2               |
| E2F1      | MYC                |
| TP53      | NOTCH2             |
| TP53      | NOTCH2             |
| SP1       | RB1                |
| ETS1      | TARDBP             |

| <b>TF</b> | <b>miRNA</b>    |
|-----------|-----------------|
| CCND1     | hsa-miR-17-5p   |
| CCND1     | hsa-miR-17      |
| CCND1     | hsa-miR-20a     |
| E2F1      | hsa-miR-106a-5p |
| E2F1      | hsa-miR-106b-5p |
| E2F1      | hsa-miR-17-5p   |
| E2F1      | hsa-miR-20a-5p  |
| E2F1      | hsa-miR-330-3p  |
| E2F1      | hsa-miR-93-5p   |
| E2F1      | hsa-let-7a      |
| E2F1      | hsa-let-7i      |
| E2F1      | hsa-miR-106a    |
| E2F1      | hsa-miR-106b    |
| E2F1      | hsa-miR-106b    |
| E2F1      | hsa-miR-15a     |
| E2F1      | hsa-miR-15a     |
| E2F1      | hsa-miR-15b     |
| E2F1      | hsa-miR-15b     |
| E2F1      | hsa-miR-16      |
| E2F1      | hsa-miR-16-1    |
| E2F1      | hsa-miR-16-2    |
| E2F1      | hsa-miR-17      |

|                 |        |
|-----------------|--------|
| hsa-miR-17-5p   | HBP1   |
| hsa-miR-19b-3p  | HBP1   |
| hsa-miR-29a-3p  | HBP1   |
| hsa-miR-370-3p  | MAP3K8 |
| hsa-miR-34a-5p  | MDM4   |
| hsa-miR-93-5p   | MFN2   |
| hsa-miR-34c-5p  | MYC    |
| hsa-miR-181a-5p | NOTCH2 |
| hsa-miR-181c-5p | NOTCH2 |
| hsa-miR-130b-3p | PRUNE2 |
| hsa-miR-19b-3p  | PRUNE2 |
| hsa-miR-106a-5p | RB1    |
| hsa-miR-106b-5p | RB1    |
| hsa-miR-17-5p   | RB1    |
| hsa-miR-192-5p  | RB1    |
| hsa-miR-20a-5p  | RB1    |
| hsa-miR-215-5p  | RB1    |
| hsa-miR-93-5p   | RB1    |
| hsa-miR-16-5p   | SEH1L  |
| hsa-miR-186-5p  | TARDBP |
| hsa-miR-125a-5p | TP53   |
| hsa-miR-485-5p  | TP53   |

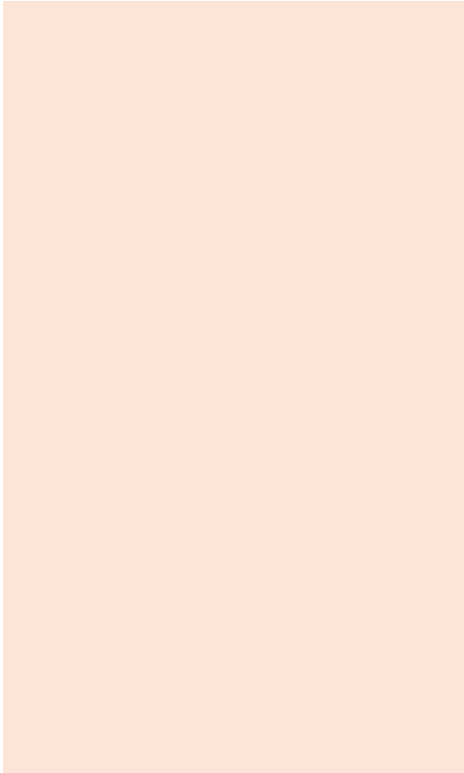

|      |                 |
|------|-----------------|
| E2F1 | hsa-miR-17      |
| E2F1 | hsa-miR-18a     |
| E2F1 | hsa-miR-18b     |
| E2F1 | hsa-miR-195     |
| E2F1 | hsa-miR-19a     |
| E2F1 | hsa-miR-19b     |
| E2F1 | hsa-miR-19b-2   |
| E2F1 | hsa-miR-20a     |
| E2F1 | hsa-miR-20b     |
| E2F1 | hsa-miR-223     |
| E2F1 | hsa-miR-25      |
| E2F1 | hsa-miR-363     |
| E2F1 | hsa-miR-449a    |
| E2F1 | hsa-miR-449a    |
| E2F1 | hsa-miR-449b    |
| E2F1 | hsa-miR-449b    |
| E2F1 | hsa-miR-449c    |
| E2F1 | hsa-miR-92a     |
| E2F1 | hsa-miR-92a-2   |
| E2F1 | hsa-miR-93      |
| EGFR | hsa-miR-133a-3p |
| EGFR | hsa-miR-133b    |
| EGFR | hsa-miR-27a-3p  |
| EGFR | hsa-miR-21      |
| MYC  | hsa-miR-34c-5p  |
| MYC  | hsa-let-7       |
| MYC  | hsa-let-7a      |
| MYC  | hsa-let-7a-1    |
| MYC  | hsa-let-7b      |
| MYC  | hsa-let-7c      |
| MYC  | hsa-let-7d      |



|     |              |
|-----|--------------|
| MYC | hsa-let-7d   |
| MYC | hsa-let-7e   |
| MYC | hsa-let-7f   |
| MYC | hsa-let-7f-1 |
| MYC | hsa-let-7g   |
| MYC | hsa-let-7i   |
| MYC | hsa-miR-106a |
| MYC | hsa-miR-106a |
| MYC | hsa-miR-106b |
| MYC | hsa-miR-141  |
| MYC | hsa-miR-15a  |
| MYC | hsa-miR-16-1 |
| MYC | hsa-miR-17   |
| MYC | hsa-miR-18a  |
| MYC | hsa-miR-195  |
| MYC | hsa-miR-19a  |
| MYC | hsa-miR-19a  |
| MYC | hsa-miR-19b  |
| MYC | hsa-miR-19b  |
| MYC | hsa-miR-20a  |
| MYC | hsa-miR-20a  |
| MYC | hsa-miR-20b  |
| MYC | hsa-miR-22   |
| MYC | hsa-miR-221  |
| MYC | hsa-miR-23a  |
| MYC | hsa-miR-23b  |
| MYC | hsa-miR-26a  |
| MYC | hsa-miR-26a  |

|      |                 |
|------|-----------------|
| MYC  | hsa-miR-26b     |
| MYC  | hsa-miR-29a     |
| MYC  | hsa-miR-29b     |
| MYC  | hsa-miR-29c     |
| MYC  | hsa-miR-34a     |
| MYC  | hsa-miR-9       |
| MYC  | hsa-miR-92a     |
| MYC  | hsa-miR-93      |
| TP53 | hsa-miR-125a-5p |
| TP53 | hsa-miR-485-5p  |
| TP53 | hsa-miR-107     |
| TP53 | hsa-miR-107     |
| TP53 | hsa-miR-125b    |
| TP53 | hsa-miR-143     |
| TP53 | hsa-miR-145     |
| TP53 | hsa-miR-145     |
| TP53 | hsa-miR-155     |
| TP53 | hsa-miR-192     |
| TP53 | hsa-miR-192     |
| TP53 | hsa-miR-192     |
| TP53 | hsa-miR-194     |
| TP53 | hsa-miR-200a    |
| TP53 | hsa-miR-200b    |
| TP53 | hsa-miR-200c    |
| TP53 | hsa-miR-215     |
| TP53 | hsa-miR-29      |
| TP53 | hsa-miR-34a     |

|      |              |
|------|--------------|
| TP53 | hsa-miR-34a  |
| TP53 | hsa-miR-34a  |
| TP53 | hsa-miR-34b  |
| TP53 | hsa-miR-34b  |
| TP53 | hsa-miR-34c  |
| TP53 | hsa-miR-34c  |
| TP53 | hsa-miR-34c  |
| TP53 | hsa-miR-519d |

### REPRODUCTIVE PROCESS

| miRNA           | Target Gene |
|-----------------|-------------|
| hsa-miR-520c-3p | APP         |
| hsa-miR-127-3p  | BCL6        |
| hsa-miR-17-5p   | CCND1       |
| hsa-miR-107     | CCNE1       |
| hsa-miR-15a-5p  | CCNE1       |
| hsa-miR-15b-5p  | CCNE1       |
| hsa-miR-16-5p   | CCNE1       |
| hsa-miR-195-5p  | CCNE1       |
| hsa-miR-424-5p  | CCNE1       |
| hsa-miR-133a-3p | EGFR        |
| hsa-miR-133b    | EGFR        |
| hsa-miR-27a-3p  | EGFR        |
| hsa-miR-221-3p  | KIT         |
| hsa-miR-222-3p  | KIT         |
| hsa-miR-100-5p  | MTOR        |
| hsa-miR-99a-5p  | MTOR        |
| hsa-miR-99b-5p  | MTOR        |
| hsa-miR-30c-5p  | NEDD4       |
| hsa-miR-30a-5p  | RAD23B      |
| hsa-miR-124-3p  | SP1         |
| hsa-miR-223-3p  | SP3         |

| TF    | Target Gene |
|-------|-------------|
| E2F1  | CCNE1       |
| HIF1A | EGFR        |
| SP1   | EGFR        |
| ETS1  | MTOR        |
| FOS   | MTOR        |
| MITF  | MTOR        |
| HIF1A | RAD23B      |
| FOS   | SP1         |
| SP1   | SP3         |
| HIF1A | VEGFA       |
| HIF1A | VEGFA       |
| SP1   | VEGFA       |
| HIF1A | ZNF148      |

| TF    | miRNA           |
|-------|-----------------|
| CCND1 | hsa-miR-17-5p   |
| CCND1 | hsa-miR-17      |
| CCND1 | hsa-miR-20a     |
| EGFR  | hsa-miR-133a-3p |
| EGFR  | hsa-miR-133b    |
| EGFR  | hsa-miR-27a-3p  |
| EGFR  | hsa-miR-21      |
| SP1   | hsa-miR-124-3p  |
| SP1   | hsa-miR-106a    |
| SP1   | hsa-miR-132     |
| SP1   | hsa-miR-34c     |
| SP1   | hsa-miR-365     |

|                 |        |
|-----------------|--------|
| hsa-miR-19b-3p  | TAF4   |
| hsa-miR-424-5p  | TBPL1  |
| hsa-miR-34a-5p  | UBP1   |
| hsa-miR-140-5p  | VEGFA  |
| hsa-miR-15a-5p  | VEGFA  |
| hsa-miR-15b-5p  | VEGFA  |
| hsa-miR-16-5p   | VEGFA  |
| hsa-miR-195-5p  | VEGFA  |
| hsa-miR-200b-3p | VEGFA  |
| hsa-miR-200c-3p | VEGFA  |
| hsa-miR-29b-3p  | VEGFA  |
| hsa-miR-29c-3p  | VEGFA  |
| hsa-miR-361-5p  | VEGFA  |
| hsa-miR-383-5p  | VEGFA  |
| hsa-miR-93-5p   | ZNF148 |
