# Supplementary material
Source: PubMed Central journal article supplement (PMC8687357)
Supplement: SYB2-10-219-s008.pdf [file SYB2-10-219-s008.pdf]

**Table S1.** Pairwise interactions of the reconstructed generic network

| <b>miRNA</b>  | <b>Target Gene</b> | <b>TF</b> | <b>Target Gene</b> | <b>TF</b> | <b>miRNA</b>    |
|---------------|--------------------|-----------|--------------------|-----------|-----------------|
| hsa-let-7a-5p | FNDC3A             | ESR1      | AK2                | AR        | hsa-miR-216a    |
| hsa-let-7a-5p | FNIP1              | ESR2      | AL356693.1         | CDX2      | hsa-miR-125b    |
| hsa-let-7a-5p | HMGA1              | HNF4A     | ALDOB              | CEBPA     | hsa-let-7a-2    |
| hsa-let-7a-5p | HMGA2              | ETS1      | CROCCP2            | CEBPA     | hsa-miR-1       |
| hsa-let-7a-5p | NRAS               | SP1       | ADA                | CEBPA     | hsa-miR-223     |
| hsa-let-7a-5p | SLC20A1            | RBL2      | AKR1A1             | CEBPA     | hsa-miR-29a     |
| hsa-let-7a-5p | SMARCAD1           | HIF1A     | BRINP1             | CEBPA     | hsa-miR-29b     |
| hsa-let-7a-5p | TAF9B              | ESR2      | CALML6             | CEBPA     | hsa-miR-34a     |
| hsa-let-7a-5p | TRIM71             | ESR1      | ADAM12             | CEBPB     | hsa-miR-143     |
| hsa-let-7a-5p | UHRF2              | TFAP2C    | CACNG4             | CREB1     | hsa-miR-132     |
| hsa-let-7b-5p | CCNJ               | HIF1A     | LEKR1              | CREB1     | hsa-miR-212     |
| hsa-let-7b-5p | CHD4               | HIF1A     | BNIP3L             | CREB1     | hsa-miR-9-2     |
| hsa-let-7b-5p | COIL               | RB1       | AHDC1              | CTCF      | hsa-miR-375     |
| hsa-let-7b-5p | DMD                | IGF1R     | PABPC1P8           | E2F1      | hsa-miR-106a-5p |
| hsa-let-7b-5p | E2F5               | CEBPA     | ABCB1              | E2F1      | hsa-miR-106b-5p |
| hsa-let-7b-5p | E2F6               | STAT6     | ATP6VOC            | E2F1      | hsa-miR-17-5p   |
| hsa-let-7b-5p | EIF4G2             | TFAP2C    | BCL3               | E2F1      | hsa-miR-20a-5p  |
| hsa-let-7b-5p | FAM178A            | HNF4A     | AGT                | E2F1      | hsa-miR-330-3p  |
| hsa-let-7b-5p | FNDC3A             | FOS       | ALKBH7             | E2F1      | hsa-miR-93-5p   |
| hsa-let-7b-5p | GRPEL2             | HIF1A     | RPL7AP33           | E2F1      | hsa-let-7a      |
| hsa-let-7b-5p | HAND1              | ESR1      | ABCA4              | E2F1      | hsa-let-7i      |
| hsa-let-7b-5p | HMGA1              | MITF      | ACTL8              | E2F1      | hsa-miR-106a    |
| hsa-let-7b-5p | HMGA2              | STAT1     | ARHGAP18           | E2F1      | hsa-miR-106b    |
| hsa-let-7b-5p | IGF2BP3            | HNF4A     | APOB               | E2F1      | hsa-miR-15a     |
| hsa-let-7b-5p | LIN28B             | CTCF      | C1orf196           | E2F1      | hsa-miR-15b     |
| hsa-let-7b-5p | NME6               | STAT1     | CAP2               | E2F1      | hsa-miR-16      |
| hsa-let-7b-5p | NRAS               | RXRRA     | ADRB1              | E2F1      | hsa-miR-16-1    |
| hsa-let-7b-5p | PCGF3              | TP53      | BAX                | E2F1      | hsa-miR-16-2    |

|               |          |
|---------------|----------|
| hsa-let-7b-5p | PDP2     |
| hsa-let-7b-5p | PGRMC1   |
| hsa-let-7b-5p | PLAGL2   |
| hsa-let-7b-5p | PRTG     |
| hsa-let-7b-5p | RDX      |
| hsa-let-7b-5p | SMC1A    |
| hsa-let-7b-5p | SPRYD4   |
| hsa-let-7b-5p | TAF9B    |
| hsa-let-7b-5p | TMEM2    |
| hsa-let-7b-5p | UTRN     |
| hsa-let-7c-5p | HMGA2    |
| hsa-let-7c-5p | NRAS     |
| hsa-let-7c-5p | PCGF3    |
| hsa-let-7c-5p | TGFBR1   |
| hsa-let-7c-5p | TRIM71   |
| hsa-let-7d-5p | CEP120   |
| hsa-let-7d-5p | HAND1    |
| hsa-let-7d-5p | HMGA2    |
| hsa-let-7d-5p | IGF1R    |
| hsa-let-7d-5p | IGF2BP3  |
| hsa-let-7d-5p | LIN28B   |
| hsa-let-7d-5p | NHLRC3   |
| hsa-let-7d-5p | PCGF3    |
| hsa-let-7d-5p | RPUSD2   |
| hsa-let-7d-5p | SLC10A7  |
| hsa-let-7d-5p | SLC20A1  |
| hsa-let-7d-5p | SMARCAD1 |
| hsa-let-7d-5p | SPRYD4   |
| hsa-let-7d-5p | STK40    |
| hsa-let-7d-5p | TGFBR1   |
| hsa-let-7d-5p | TMEM2    |

|        |             |
|--------|-------------|
| ZNF263 | AC010970.2  |
| SP1    | ACTC1       |
| ETS1   | CAMTA1      |
| GATA2  | APITD1-CORT |
| TP53   | C4BPAP2     |
| GATA3  | ALDH4A1     |
| MITF   | CAMTA1      |
| STAT6  | ATF1        |
| TP53   | ARHGEF19    |
| STAT6  | C14orf132   |
| FOS    | CAMTA1      |
| CEBPA  | B3GALT6     |
| GATA3  | C1orf196    |
| GATA2  | AZIN2       |
| MYOD1  | ACTC1       |
| PDX1   | ADA         |
| ESR1   | ABLIM1      |
| EGR1   | ATP4A       |
| TRIM28 | AZIN2       |
| SOX2   | ATP5LP4     |
| TFAP2C | AZIN1       |
| EPAS1  | ATP9A       |
| PRDM14 | ASS1P7      |
| SOX2   | BMP7        |
| SOX2   | ANO1-AS2    |
| TFAP2C | BHLHE40     |
| STAT6  | C10orf111   |
| E2F4   | C1orf196    |
| FOXA1  | AFF3        |
| E2F4   | C1orf174    |
| FOXA1  | ANKRD6      |

|      |               |
|------|---------------|
| E2F1 | hsa-miR-17    |
| E2F1 | hsa-miR-18a   |
| E2F1 | hsa-miR-18b   |
| E2F1 | hsa-miR-195   |
| E2F1 | hsa-miR-19a   |
| E2F1 | hsa-miR-19b   |
| E2F1 | hsa-miR-19b-2 |
| E2F1 | hsa-miR-20a   |
| E2F1 | hsa-miR-20b   |
| E2F1 | hsa-miR-223   |
| E2F1 | hsa-miR-25    |
| E2F1 | hsa-miR-363   |
| E2F1 | hsa-miR-449a  |
| E2F1 | hsa-miR-449b  |
| E2F1 | hsa-miR-449c  |
| E2F1 | hsa-miR-92a   |
| E2F1 | hsa-miR-92a-2 |
| E2F1 | hsa-miR-93    |
| EGR1 | hsa-let-7e    |
| EGR1 | hsa-miR-106a  |
| EGR1 | hsa-miR-10a   |
| EGR1 | hsa-miR-124-3 |
| EGR1 | hsa-miR-125a  |
| EGR1 | hsa-miR-130b  |
| EGR1 | hsa-miR-132   |
| EGR1 | hsa-miR-142   |
| EGR1 | hsa-miR-146b  |
| EGR1 | hsa-miR-148a  |
| EGR1 | hsa-miR-149   |
| EGR1 | hsa-miR-183   |
| EGR1 | hsa-miR-185   |

|               |          |
|---------------|----------|
| hsa-let-7e-5p | GNG5     |
| hsa-let-7e-5p | HIF1AN   |
| hsa-let-7e-5p | HMGA2    |
| hsa-let-7e-5p | IGF1R    |
| hsa-let-7e-5p | IGF2BP3  |
| hsa-let-7e-5p | PDP2     |
| hsa-let-7e-5p | RDX      |
| hsa-let-7e-5p | SMAP2    |
| hsa-let-7e-5p | SMC1A    |
| hsa-let-7f-5p | HMGA2    |
| hsa-let-7f-5p | LRIG3    |
| hsa-let-7g-5p | HMGA2    |
| hsa-miR-1     | FoxP1    |
| hsa-miR-1     | HDAC4    |
| hsa-miR-1     | KCNJ2    |
| hsa-miR-1     | MET      |
| hsa-miR-1     | ACPL2    |
| hsa-miR-1     | ADAR     |
| hsa-miR-1     | ANKIB1   |
| hsa-miR-1     | ARCN1    |
| hsa-miR-1     | ARF3     |
| hsa-miR-1     | ARF4     |
| hsa-miR-1     | ARHGEF18 |
| hsa-miR-1     | ATP6V1B2 |
| hsa-miR-1     | AXL      |
| hsa-miR-1     | BDNF     |
| hsa-miR-1     | BLCAP    |
| hsa-miR-1     | C12orf49 |
| hsa-miR-1     | CAND1    |
| hsa-miR-1     | CAP1     |
| hsa-miR-1     | CDK9     |

|         |           |
|---------|-----------|
| RBL2    | ARHGEF19  |
| HIF1A   | BCL7A     |
| MITF    | C1orf196  |
| SOX2    | ARID5B    |
| TFAP2C  | ADCY9     |
| STAT6   | C1orf174  |
| SMARCA4 | B3GALT6   |
| ESR1    | ARHGAP22  |
| PRDM14  | BCAT2     |
| ETS1    | ALDH4A1   |
| RBL2    | ARHGEF10L |
| STAT6   | ATE1      |
| STAT6   | ATXN2L    |
| GATA3   | C1orf174  |
| STAT1   | BCOR      |
| GATA3   | CAPZB     |
| RB1     | CAPZB     |
| HIF1A   | ATG9A     |
| ESR1    | AFAP1L2   |
| RBL2    | AZIN2     |
| TAL1    | AGBL4     |
| RBL2    | AGTRAP    |
| EPAS1   | AP3S1     |
| TAL1    | ATG4C     |
| EGR1    | ANKRD30BL |
| STAT6   | BANF1     |
| STAT1   | B4GALT5   |
| TP53    | BTG2      |
| TFAP2C  | C14orf132 |
| RBL2    | ATAD3B    |
| EPAS1   | APOLD1    |

|      |                 |
|------|-----------------|
| EGR1 | hsa-miR-191     |
| EGR1 | hsa-miR-200b    |
| EGR1 | hsa-miR-212     |
| EGR1 | hsa-miR-219-2   |
| EGR1 | hsa-miR-23a     |
| EGR1 | hsa-miR-24-2    |
| EGR1 | hsa-miR-27a     |
| EGR1 | hsa-miR-301b    |
| EGR1 | hsa-miR-30a     |
| EGR1 | hsa-miR-30c-1   |
| EGR1 | hsa-miR-30c-2   |
| EGR1 | hsa-miR-30e     |
| EGR1 | hsa-miR-32      |
| EGR1 | hsa-miR-335     |
| EGR1 | hsa-miR-425     |
| EGR1 | hsa-miR-455     |
| EGR1 | hsa-miR-596     |
| EGR1 | hsa-miR-642a    |
| EGR1 | hsa-miR-92b     |
| EGR1 | hsa-miR-96      |
| EGR1 | hsa-miR-99b     |
| ESR2 | hsa-miR-23b     |
| ESR2 | hsa-miR-24-1    |
| ESR2 | hsa-miR-27b     |
| ESR2 | hsa-miR-30a     |
| ETS1 | hsa-miR-125b-5p |
| ETS1 | hsa-miR-155-5p  |
| ETS1 | hsa-miR-208a-3p |
| ETS1 | hsa-miR-146a    |
| ETS1 | hsa-miR-222     |
| FLI1 | hsa-let-7a      |

|           |          |
|-----------|----------|
| hsa-miR-1 | CHST11   |
| hsa-miR-1 | CHSY1    |
| hsa-miR-1 | CLCN3    |
| hsa-miR-1 | CNN3     |
| hsa-miR-1 | DDX5     |
| hsa-miR-1 | DHX15    |
| hsa-miR-1 | EML4     |
| hsa-miR-1 | EPB41L4B |
| hsa-miR-1 | FAM57A   |
| hsa-miR-1 | G6PD     |
| hsa-miR-1 | GCH1     |
| hsa-miR-1 | GJA1     |
| hsa-miR-1 | H3F3B    |
| hsa-miR-1 | HCN4     |
| hsa-miR-1 | HPS4     |
| hsa-miR-1 | HSPD1    |
| hsa-miR-1 | IFT52    |
| hsa-miR-1 | INPP5F   |
| hsa-miR-1 | KIF2A    |
| hsa-miR-1 | LASP1    |
| hsa-miR-1 | LIN7C    |
| hsa-miR-1 | MMD      |
| hsa-miR-1 | MTMR12   |
| hsa-miR-1 | MTX1     |
| hsa-miR-1 | MXD4     |
| hsa-miR-1 | OAT      |
| hsa-miR-1 | PDCD4    |
| hsa-miR-1 | PGM2     |
| hsa-miR-1 | PIM1     |
| hsa-miR-1 | POGK     |
| hsa-miR-1 | POLR2K   |

|         |            |
|---------|------------|
| HNF4A   | AL356693.1 |
| CEBPA   | APOC3      |
| HIF1A   | ARHGAP5    |
| RUNX1   | AHI1       |
| ESR1    | C10orf105  |
| EPAS1   | BBOX1      |
| STAT1   | AIM2       |
| BACH1   | C14orf37   |
| PEG10   | ALDOA      |
| CEBPA   | C1orf174   |
| TP53    | AJAP1      |
| PRDM14  | SNORD44    |
| ZNF263  | ANO7       |
| ESR1    | ATRNL1     |
| SMARCA4 | CA6        |
| TAL1    | ADGRL4     |
| IGF1R   | AL732363.1 |
| RB1     | AK2        |
| ESR1    | AKR1C4     |
| RBL2    | AGRN       |
| STAT6   | BDNF-AS    |
| STAT1   | C6orf223   |
| RUNX1   | RUNX1      |
| FOS     | AP5Z1      |
| SOX2    | RUNX1      |
| RBL2    | C1orf84    |
| IGF1R   | CICP9      |
| GATA2   | ATP13A2    |
| IGF1R   | DUX4L15    |
| MITF    | ACOT7      |
| STAT1   | ADAR       |

|       |                 |
|-------|-----------------|
| FOS   | hsa-miR-101-3p  |
| FOS   | hsa-miR-139-5p  |
| FOSL1 | hsa-miR-221     |
| FOSL1 | hsa-miR-222     |
| FOXM1 | hsa-miR-135b    |
| GATA3 | hsa-miR-200a    |
| GATA3 | hsa-miR-200b    |
| GATA3 | hsa-miR-200c    |
| GATA4 | hsa-miR-144     |
| GATA4 | hsa-miR-451     |
| HIF1A | hsa-miR-18a-5p  |
| HIF1A | hsa-miR-199b-5p |
| HIF1A | hsa-miR-20a-5p  |
| HIF1A | hsa-miR-20b-5p  |
| HIF1A | hsa-miR-210     |
| HIF1A | hsa-miR-372     |
| HIF1A | hsa-miR-373     |
| HIF1A | hsa-miR-424     |
| HNF1A | hsa-miR-122     |
| HNF1A | hsa-miR-192     |
| HNF1A | hsa-miR-194     |
| IRF1  | hsa-miR-383-5p  |
| IRF1  | hsa-miR-93-5p   |
| IRF1  | hsa-miR-155     |
| IRF4  | hsa-miR-125b-5p |
| MITF  | hsa-miR-137     |
| MITF  | hsa-miR-182-5p  |
| MITF  | hsa-miR-211     |
| MYB   | hsa-miR-150-5p  |
| MYB   | hsa-miR-148a    |
| MYB   | hsa-miR-155     |

|                |          |
|----------------|----------|
| hsa-miR-1      | RABGAP1L |
| hsa-miR-1      | RBM47    |
| hsa-miR-1      | RNF138   |
| hsa-miR-1      | SERP1    |
| hsa-miR-1      | SERPINB5 |
| hsa-miR-1      | SLC25A30 |
| hsa-miR-1      | SLC44A1  |
| hsa-miR-1      | SRXN1    |
| hsa-miR-1      | TAGLN2   |
| hsa-miR-1      | TDP1     |
| hsa-miR-1      | TIMP3    |
| hsa-miR-1      | TPM4     |
| hsa-miR-1      | TRAPPC3  |
| hsa-miR-1      | TRIM2    |
| hsa-miR-1      | TSPAN4   |
| hsa-miR-1      | TWF1     |
| hsa-miR-1      | UHMK1    |
| hsa-miR-1      | UST      |
| hsa-miR-1      | XPNPEP3  |
| hsa-miR-1      | ZNF264   |
| hsa-miR-100-5p | MTOR     |
| hsa-miR-101-3p | AEBP2    |
| hsa-miR-101-3p | ARAP2    |
| hsa-miR-101-3p | ARID1A   |
| hsa-miR-101-3p | ATXN1    |
| hsa-miR-101-3p | BCL9     |
| hsa-miR-101-3p | CAPN2    |
| hsa-miR-101-3p | CBFA2T2  |
| hsa-miR-101-3p | CERS2    |
| hsa-miR-101-3p | DDIT4    |
| hsa-miR-101-3p | DNMT3A   |

|        |              |
|--------|--------------|
| TAL1   | AKR1A1       |
| CEBPA  | hsa-miR-1977 |
| E2F4   | AUNIP        |
| SRF    | ADH1A        |
| E2F4   | ADGRB2       |
| RB1    | MAD2L2       |
| RUNX1  | ATP11A       |
| ETS1   | ATAD3B       |
| FOS    | RNA5SP376    |
| ESR1   | RNU1-7P      |
| FOS    | ANO8         |
| TP53   | RNU6-1211P   |
| PRDM14 | RNU6-248P    |
| SP3    | AGTR1        |
| SOX2   | APIP         |
| ESR1   | ATP13A2      |
| STAT6  | ALOX5        |
| EPAS1  | RNU7-76P     |
| STAT6  | ASB2         |
| FOS    | SNHG10       |
| FOXA1  | ADAMTS9      |
| ESR1   | SNORA71      |
| HIF1A  | ATXN7L1      |
| TP53   | ATF3         |
| EPAS1  | Y_RNA        |
| CTCF   | AADAACL4     |
| STAT6  | C12orf77     |
| RBL2   | AADAACL4     |
| HIF1A  | AGGF1        |
| FOS    | ASNA1        |
| HNF4A  | ACADM        |

|     |                |
|-----|----------------|
| MYC | hsa-miR-34c-5p |
| MYC | hsa-let-7      |
| MYC | hsa-let-7a     |
| MYC | hsa-let-7a-1   |
| MYC | hsa-let-7b     |
| MYC | hsa-let-7c     |
| MYC | hsa-let-7d     |
| MYC | hsa-let-7e     |
| MYC | hsa-let-7f     |
| MYC | hsa-let-7f-1   |
| MYC | hsa-let-7g     |
| MYC | hsa-let-7i     |
| MYC | hsa-miR-106a   |
| MYC | hsa-miR-106b   |
| MYC | hsa-miR-141    |
| MYC | hsa-miR-15a    |
| MYC | hsa-miR-16-1   |
| MYC | hsa-miR-17     |
| MYC | hsa-miR-18a    |
| MYC | hsa-miR-195    |
| MYC | hsa-miR-19a    |
| MYC | hsa-miR-19b    |
| MYC | hsa-miR-20a    |
| MYC | hsa-miR-20b    |
| MYC | hsa-miR-22     |
| MYC | hsa-miR-221    |
| MYC | hsa-miR-23a    |
| MYC | hsa-miR-23b    |
| MYC | hsa-miR-26a    |
| MYC | hsa-miR-26b    |
| MYC | hsa-miR-29a    |

|                 |         |
|-----------------|---------|
| hsa-miR-101-3p  | DUSP1   |
| hsa-miR-101-3p  | EED     |
| hsa-miR-101-3p  | EZH2    |
| hsa-miR-101-3p  | FBN2    |
| hsa-miR-101-3p  | FBXW7   |
| hsa-miR-101-3p  | FOS     |
| hsa-miR-101-3p  | FZD6    |
| hsa-miR-101-3p  | ICK     |
| hsa-miR-101-3p  | INO80D  |
| hsa-miR-101-3p  | LCOR    |
| hsa-miR-101-3p  | LIN7C   |
| hsa-miR-101-3p  | LMNB1   |
| hsa-miR-101-3p  | MFSD6   |
| hsa-miR-101-3p  | MPPE1   |
| hsa-miR-101-3p  | MYCN    |
| hsa-miR-101-3p  | NEK7    |
| hsa-miR-101-3p  | NUPL2   |
| hsa-miR-101-3p  | PIP5K1C |
| hsa-miR-101-3p  | PTGS2   |
| hsa-miR-101-3p  | RAB5A   |
| hsa-miR-101-3p  | RANBP9  |
| hsa-miR-101-3p  | SEPT11  |
| hsa-miR-101-3p  | SLC38A2 |
| hsa-miR-101-3p  | SMARCD1 |
| hsa-miR-101-3p  | STAMBP  |
| hsa-miR-101-3p  | SUB1    |
| hsa-miR-101-3p  | TGFBR1  |
| hsa-miR-101-3p  | TGFBR3  |
| hsa-miR-103a-3p | AGFG1   |
| hsa-miR-103a-3p | ARL4C   |
| hsa-miR-103a-3p | ASH1L   |

|         |           |
|---------|-----------|
| ZNF263  | ASS1P6    |
| RB1     | AJAP1     |
| EPAS1   | APLP1     |
| BACH1   | C16orf72  |
| RB1     | ATAD3A    |
| HNF4A   | AGRN      |
| RUNX1   | ADARB2    |
| EGR1    | ALDOC     |
| STAT6   | ATP1A1    |
| SOX2    | BMP2      |
| STAT6   | ADPRHL1   |
| STAT1   | ACEA_U3   |
| SP1     | ALDOA     |
| SP1     | ACHE      |
| STAT6   | ACY3      |
| CEBPA   | ACOT7     |
| RB1     | ARHGEF10L |
| ETS1    | ACOT7     |
| SMARCA4 | ACOT7     |
| HNF4A   | ACOT7     |
| CEBPA   | AGTRAP    |
| ESR1    | ARHGEF16  |
| FOXA1   | BRIP1     |
| SRF     | ACTA1     |
| TP53    | ADGRL2    |
| ZNF263  | ADGRD1    |
| TEF     | ACTA1     |
| SP1     | AGTR1     |
| E2F4    | AHDC1     |
| FOS     | BABAM1    |
| GATA3   | ACTL8     |

|        |                |
|--------|----------------|
| MYC    | hsa-miR-29b    |
| MYC    | hsa-miR-29c    |
| MYC    | hsa-miR-34a    |
| MYC    | hsa-miR-9      |
| MYC    | hsa-miR-92a    |
| MYC    | hsa-miR-93     |
| MYF5   | hsa-hsa-miR-1  |
| MYF5   | hsa-miR-133a   |
| MYF5   | hsa-miR-206    |
| MYOD1  | hsa-miR-378    |
| NFKB1  | hsa-let-7a-3   |
| NFKB1  | hsa-let-7b     |
| NFKB1  | hsa-miR-10b    |
| NFKB1  | hsa-miR-125b   |
| NFKB1  | hsa-miR-146a   |
| NFKB1  | hsa-miR-155    |
| NFKB1  | hsa-miR-16     |
| NFKB1  | hsa-miR-17     |
| NFKB1  | hsa-miR-199a-2 |
| NFKB1  | hsa-miR-21     |
| NFKB1  | hsa-miR-214    |
| NFKB1  | hsa-miR-224    |
| NFKB1  | hsa-miR-29a    |
| NFKB1  | hsa-miR-29b    |
| NFKB1  | hsa-miR-29c    |
| NFKB1  | hsa-miR-34a    |
| NFKB1  | hsa-miR-365    |
| NFKB1  | hsa-miR-448    |
| NFKB1  | hsa-miR-9      |
| POU2F1 | hsa-let-7g     |
| RELA   | hsa-miR-124-3p |

|                 |         |
|-----------------|---------|
| hsa-miR-103a-3p | ATP13A3 |
| hsa-miR-103a-3p | AXIN2   |
| hsa-miR-103a-3p | CAPZA2  |
| hsa-miR-103a-3p | CLIP1   |
| hsa-miR-103a-3p | CNNM2   |
| hsa-miR-103a-3p | DICER1  |
| hsa-miR-103a-3p | FBXW7   |
| hsa-miR-103a-3p | ITGA2   |
| hsa-miR-103a-3p | JAKMIP2 |
| hsa-miR-103a-3p | LCOR    |
| hsa-miR-103a-3p | MTMR4   |
| hsa-miR-103a-3p | N4BP1   |
| hsa-miR-103a-3p | NDEL1   |
| hsa-miR-103a-3p | NUP50   |
| hsa-miR-103a-3p | POLD3   |
| hsa-miR-103a-3p | PRKAB2  |
| hsa-miR-103a-3p | RAB1B   |
| hsa-miR-103a-3p | RNMT    |
| hsa-miR-103a-3p | SALL1   |
| hsa-miR-103a-3p | SIPA1L2 |
| hsa-miR-103a-3p | SOWAHC  |
| hsa-miR-103a-3p | SPATS2L |
| hsa-miR-103a-3p | SUN2    |
| hsa-miR-103a-3p | SYNJ1   |
| hsa-miR-103a-3p | TPD52   |
| hsa-miR-103a-3p | YWHAH   |
| hsa-miR-103a-3p | ZHX1    |
| hsa-miR-103a-3p | ZNRF2   |
| hsa-miR-106a-5p | ARID4B  |
| hsa-miR-106a-5p | DCBLD2  |
| hsa-miR-106a-5p | E2F1    |

|        |           |
|--------|-----------|
| ZNF263 | ANKRD30BL |
| SOX2   | ACTR1A    |
| RBL2   | C1orf159  |
| IGF1R  | ACTR3BP5  |
| CTCF   | APITD1    |
| ESR1   | C10orf76  |
| STAT6  | SNAP47    |
| ESR2   | ARHGEF10L |
| EPAS1  | ASS1P7    |
| STAT6  | AKT3      |
| EGR1   | FAM136BP  |
| PRDM14 | ANXA3     |
| EPAS1  | HMGB1P38  |
| FOXA1  | BBOX1     |
| STAT6  | ANKRD49   |
| BACH1  | RN7SKP170 |
| IGF1R  | RNA5SP423 |
| ETS1   | RNU1-7P   |
| RBL2   | AKR7A2    |
| HIF1A  | ASPH      |
| TAL1   | C1orf228  |
| TP53   | CAPZA1    |
| ETS1   | AGTRAP    |
| FOXA1  | ASCC3     |
| SOX2   | C7orf33   |
| TRIM28 | RNU1-143P |
| RB1    | AZIN2     |
| PRDM14 | SNX18P25  |
| CTCF   | C1orf127  |
| RB1    | CAMTA1    |
| FOXA1  | BCL9      |

|       |                |
|-------|----------------|
| RELA  | hsa-miR-7-5p   |
| RELA  | hsa-miR-21     |
| REST  | hsa-miR-21     |
| REST  | hsa-miR-9-2    |
| RUNX1 | hsa-miR-27a    |
| RXRA  | hsa-miR-193a   |
| SMAD3 | hsa-miR-143    |
| SMAD3 | hsa-miR-145    |
| SMAD3 | hsa-miR-200a   |
| SMAD3 | hsa-miR-200b   |
| SMAD3 | hsa-miR-451    |
| SNAI1 | hsa-miR-34a    |
| SNAI1 | hsa-miR-34b    |
| SOX10 | hsa-miR-338    |
| SOX2  | hsa-miR-137    |
| SOX2  | hsa-miR-302a   |
| SOX2  | hsa-miR-302b   |
| SOX2  | hsa-miR-302c   |
| SOX2  | hsa-miR-302d   |
| SOX2  | hsa-miR-367    |
| SP1   | hsa-miR-124-3p |
| SP1   | hsa-miR-106a   |
| SP1   | hsa-miR-132    |
| SP1   | hsa-miR-34c    |
| SP1   | hsa-miR-365    |
| SPI1  | hsa-miR-146a   |
| SPI1  | hsa-miR-155    |
| SPI1  | hsa-miR-17     |
| SPI1  | hsa-miR-18a    |
| SPI1  | hsa-miR-19a    |
| SPI1  | hsa-miR-19b-1  |

|                 |         |
|-----------------|---------|
| hsa-miR-106a-5p | KPNA2   |
| hsa-miR-106a-5p | RB1     |
| hsa-miR-106a-5p | SEPT2   |
| hsa-miR-106a-5p | WEE1    |
| hsa-miR-106a-5p | ZBTB47  |
| hsa-miR-106b-5p | AP2B1   |
| hsa-miR-106b-5p | ATAD2   |
| hsa-miR-106b-5p | BRMS1L  |
| hsa-miR-106b-5p | BTG3    |
| hsa-miR-106b-5p | C9orf40 |
| hsa-miR-106b-5p | CLOCK   |
| hsa-miR-106b-5p | CNOT6L  |
| hsa-miR-106b-5p | CNOT7   |
| hsa-miR-106b-5p | CROT    |
| hsa-miR-106b-5p | E2F1    |
| hsa-miR-106b-5p | EIF5A2  |
| hsa-miR-106b-5p | ELK3    |
| hsa-miR-106b-5p | FAM199X |
| hsa-miR-106b-5p | JAK1    |
| hsa-miR-106b-5p | KAT2B   |
| hsa-miR-106b-5p | KATNAL1 |
| hsa-miR-106b-5p | PKD2    |
| hsa-miR-106b-5p | PRRG1   |
| hsa-miR-106b-5p | RB1     |
| hsa-miR-106b-5p | RBL2    |
| hsa-miR-106b-5p | RBM12B  |
| hsa-miR-106b-5p | RORA    |
| hsa-miR-106b-5p | USP46   |
| hsa-miR-106b-5p | WEE1    |
| hsa-miR-107     | DICER1  |
| hsa-miR-107     | PLAG1   |

|        |            |
|--------|------------|
| CEBPA  | C1orf86    |
| GATA3  | AADA4L4    |
| SOX2   | ABCA12     |
| STAT1  | AC007333.1 |
| RBL2   | ACTL8      |
| EWSR1  | BAIAP3     |
| PRDM14 | ABCB5      |
| IGF1R  | ABCD1P2    |
| TAL1   | BCAR3      |
| FOXA1  | ABHD2      |
| ESR1   | C10orf10   |
| RUNX1  | ARHGEF6    |
| SOX2   | ABTB2      |
| FOS    | C19orf40   |
| TP53   | AC098935.2 |
| ZNF263 | AC136932.1 |
| NFYB   | ATP1A3     |
| RUNX1  | BRD9       |
| STAT1  | snoU13     |
| HIF1A  | ATP5G1P8   |
| SOX2   | ADAMTSL1   |
| SOX2   | ACIN1      |
| SP1    | ATF2       |
| E2F4   | ACOT7      |
| GATA2  | ACOT7      |
| RUNX1  | ATG16L1    |
| FOXA1  | BCAS3      |
| RBL2   | C1orf196   |
| EPAS1  | BRSK2      |
| RBL2   | CAPZB      |
| STAT1  | B2M        |

|       |                 |
|-------|-----------------|
| SPI1  | hsa-miR-20a     |
| SPI1  | hsa-miR-23a     |
| SPI1  | hsa-miR-338     |
| SPI1  | hsa-miR-342     |
| SPI1  | hsa-miR-92a-1   |
| STAT3 | hsa-miR-20a-5p  |
| STAT3 | hsa-miR-20b-5p  |
| STAT3 | hsa-miR-21-5p   |
| STAT3 | hsa-miR-93-5p   |
| STAT3 | hsa-miR-125b    |
| STAT3 | hsa-miR-135b    |
| STAT3 | hsa-miR-181b-1  |
| STAT3 | hsa-miR-21      |
| TCF3  | hsa-miR-451     |
| TCF3  | hsa-miR-709     |
| TCF4  | hsa-miR-181a-2  |
| TCF4  | hsa-miR-181b-2  |
| TCF4  | hsa-miR-21      |
| TP53  | hsa-miR-125a-5p |
| TP53  | hsa-miR-485-5p  |
| TP53  | hsa-miR-107     |
| TP53  | hsa-miR-125b    |
| TP53  | hsa-miR-143     |
| TP53  | hsa-miR-145     |
| TP53  | hsa-miR-155     |
| TP53  | hsa-miR-192     |
| TP53  | hsa-miR-194     |
| TP53  | hsa-miR-200a    |
| TP53  | hsa-miR-200b    |
| TP53  | hsa-miR-200c    |
| TP53  | hsa-miR-215     |



|                |          |
|----------------|----------|
| hsa-miR-107    | RAB1B    |
| hsa-miR-107    | BACE1    |
| hsa-miR-107    | CCNE1    |
| hsa-miR-107    | CDCA4    |
| hsa-miR-107    | CDK6     |
| hsa-miR-107    | FBXW7    |
| hsa-miR-10a-5p | ELOVL2   |
| hsa-miR-10a-5p | GALNT1   |
| hsa-miR-10a-5p | LCA5     |
| hsa-miR-10a-5p | NCOR2    |
| hsa-miR-10a-5p | RPRD1A   |
| hsa-miR-10a-5p | TFAP2C   |
| hsa-miR-10a-5p | TRIM2    |
| hsa-miR-10a-5p | XRN1     |
| hsa-miR-10b-5p | MAPRE1   |
| hsa-miR-10b-5p | NCOR2    |
| hsa-miR-10b-5p | TFAP2C   |
| hsa-miR-122-5p | ANKRD13C |
| hsa-miR-122-5p | CLIC4    |
| hsa-miR-122-5p | GNPDA2   |
| hsa-miR-122-5p | P4HA1    |
| hsa-miR-122-5p | PIP4K2A  |
| hsa-miR-122-5p | SLC9A1   |
| hsa-miR-124-3p | AMMECR1  |
| hsa-miR-124-3p | ANKRD27  |
| hsa-miR-124-3p | ANXA11   |
| hsa-miR-124-3p | ARMC1    |
| hsa-miR-124-3p | B4GALT1  |
| hsa-miR-124-3p | C3orf58  |
| hsa-miR-124-3p | CBX2     |
| hsa-miR-124-3p | CD164    |

|         |          |
|---------|----------|
| NFYA    | ACTB     |
| ESR2    | ACTL8    |
| FOXA1   | BFSP2    |
| HIF1A   | ACTR1B   |
| PRDM14  | ACTR2    |
| ETS1    | C1orf127 |
| ETS1    | ATAD3A   |
| CTCF    | ACTRT2   |
| TAL1    | ACTRT2   |
| ETS1    | ACTRT2   |
| TAL1    | C1orf141 |
| RUNX1   | ARHGAP39 |
| ESR1    | APBB1IP  |
| MIR6764 | ADA      |
| FOS     | BCAS3    |
| SOX2    | CACNA1A  |
| RBL2    | ACOT7    |
| TFAP2C  | ADAM8    |
| ZNF263  | ADAMTS10 |
| HIF1A   | ADAMTS9  |
| HIF1A   | ANKRD37  |
| STAT1   | BST1     |
| ZNF263  | C9orf171 |
| FOS     | ARRDC4   |
| STAT6   | ADAR     |
| STAT6   | ADAT1    |
| ESR1    | ADGRB2   |
| CEBPA   | AJAP1    |
| STAT6   | ACCS     |
| FOXA2   | APOA1    |
| TP53    | ADGRB2   |

|      |                 |
|------|-----------------|
| TP53 | hsa-miR-29      |
| TP53 | hsa-miR-34a     |
| TP53 | hsa-miR-34b     |
| TP53 | hsa-miR-34c     |
| TP53 | hsa-miR-519d    |
| YY1  | hsa-miR-1       |
| YY1  | hsa-miR-29a     |
| YY1  | hsa-miR-29b     |
| YY1  | hsa-miR-29c     |
| ZEB1 | hsa-miR-141-3p  |
| ZEB1 | hsa-miR-200a-3p |
| ZEB1 | hsa-miR-200b-3p |
| ZEB1 | hsa-miR-200c-3p |
| ZEB1 | hsa-miR-205-5p  |
| ZEB1 | hsa-miR-429     |
| ZEB1 | hsa-let-7       |
| ZEB1 | hsa-miR-141     |
| ZEB1 | hsa-miR-200a    |
| ZEB1 | hsa-miR-200b    |
| ZEB1 | hsa-miR-200c    |
| ZEB1 | hsa-miR-34a     |
| ZEB1 | hsa-miR-34b     |
| ZEB2 | hsa-miR-141-3p  |
| ZEB2 | hsa-miR-200a-3p |
| ZEB2 | hsa-miR-200b-3p |
| ZEB2 | hsa-miR-200c-3p |
| ZEB2 | hsa-miR-429     |
| ZEB2 | hsa-miR-141     |
| ZEB2 | hsa-miR-200a    |
| ZEB2 | hsa-miR-200b    |
| ZEB2 | hsa-miR-200c    |

|                |          |
|----------------|----------|
| hsa-miR-124-3p | CDH2     |
| hsa-miR-124-3p | CHST14   |
| hsa-miR-124-3p | CHSY1    |
| hsa-miR-124-3p | CLMP     |
| hsa-miR-124-3p | CMTM4    |
| hsa-miR-124-3p | COL4A1   |
| hsa-miR-124-3p | CREB3L2  |
| hsa-miR-124-3p | CRTC3    |
| hsa-miR-124-3p | CTDSP1   |
| hsa-miR-124-3p | CTDSP2   |
| hsa-miR-124-3p | CTNND1   |
| hsa-miR-124-3p | CYB5A    |
| hsa-miR-124-3p | DDX3X    |
| hsa-miR-124-3p | DDX6     |
| hsa-miR-124-3p | DHCR24   |
| hsa-miR-124-3p | DNAJC1   |
| hsa-miR-124-3p | DSG2     |
| hsa-miR-124-3p | ECI2     |
| hsa-miR-124-3p | EEA1     |
| hsa-miR-124-3p | EIF3B    |
| hsa-miR-124-3p | ELK3     |
| hsa-miR-124-3p | EVI5     |
| hsa-miR-124-3p | EYA4     |
| hsa-miR-124-3p | FAM129B  |
| hsa-miR-124-3p | FAM171A1 |
| hsa-miR-124-3p | FAM177A1 |
| hsa-miR-124-3p | FAM199X  |
| hsa-miR-124-3p | FAM57A   |
| hsa-miR-124-3p | FCHO2    |
| hsa-miR-124-3p | FLOT2    |
| hsa-miR-124-3p | FPGS     |

|        |            |
|--------|------------|
| TP53   | AL592307.1 |
| ZNF263 | ADGRG1     |
| ESR1   | B3GALT6    |
| HIF1A  | AZIN1      |
| EGR1   | ADGRV1     |
| GATA2  | ARID1A     |
| USF1   | ADH1B      |
| EPAS1  | ADH5P2     |
| HIF1A  | ANKZF1     |
| TFAP2C | ARSG       |
| ETS1   | B3GALT6    |
| MITF   | ARHGEF10L  |
| SOX2   | ADRA1A     |
| FOXA1  | ATXN7L1    |
| ESR1   | ADRB1      |
| MITF   | AL356693.1 |
| TFAP2C | BCAS4      |
| SOX2   | AGMO       |
| ESR1   | C1orf122   |
| RB1    | AGRN       |
| RUNX1  | ANKFN1     |
| RBL2   | AUNIP      |
| HNF4A  | AURKAIP1   |
| E2F4   | CPSF3L     |
| STAT6  | AURKAIP1   |
| TP53   | AL583842.5 |
| GATA3  | ARHGEF10L  |
| EPAS1  | ALDOA      |
| STAT6  | AHNAK      |
| STAT6  | AIM1L      |
| STAT6  | ATF7       |

|        |                 |
|--------|-----------------|
| AKT1   | hsa-let-7e      |
| AKT1   | hsa-miR-125b    |
| AKT1   | hsa-miR-155     |
| AKT1   | hsa-miR-181c    |
| AKT1   | hsa-miR-22      |
| AKT2   | hsa-miR-22      |
| AKT3   | hsa-miR-15a-5p  |
| AKT3   | hsa-miR-16-5p   |
| AKT3   | hsa-miR-29c-3p  |
| AKT3   | hsa-miR-22      |
| AML1   | hsa-miR-223     |
| AP-1   | hsa-miR-155     |
| AP-1   | hsa-miR-21      |
| AP-1   | hsa-miR-29a     |
| AP-1   | hsa-miR-29b-1   |
| ASH1L  | hsa-miR-103a-3p |
| ASH1L  | hsa-miR-16-5p   |
| ASH1L  | hsa-miR-375     |
| BCL11A | hsa-miR-32-5p   |
| BCR    | hsa-miR-155     |
| BDP1   | hsa-miR-30b-5p  |
| BMP2   | hsa-miR-24-1    |
| BMP2   | hsa-miR-31      |
| BMP4   | hsa-miR-145     |
| BMP4   | hsa-miR-200a    |
| BMP4   | hsa-miR-200b    |
| BMP4   | hsa-miR-200c    |
| BMP4   | hsa-miR-205     |
| BMP6   | hsa-miR-21      |
| BMPR1a | hsa-miR-21      |
| BMPR1b | hsa-miR-21      |

|                |         |
|----------------|---------|
| hsa-miR-124-3p | FRMD6   |
| hsa-miR-124-3p | FRMD8   |
| hsa-miR-124-3p | GGA2    |
| hsa-miR-124-3p | GNG10   |
| hsa-miR-124-3p | GRB2    |
| hsa-miR-124-3p | GSN     |
| hsa-miR-124-3p | GXYLT1  |
| hsa-miR-124-3p | HEBP2   |
| hsa-miR-124-3p | HIPK3   |
| hsa-miR-124-3p | HTATIP2 |
| hsa-miR-124-3p | IQGAP1  |
| hsa-miR-124-3p | ITGA3   |
| hsa-miR-124-3p | ITGB1   |
| hsa-miR-124-3p | KANK1   |
| hsa-miR-124-3p | KANK2   |
| hsa-miR-124-3p | KLF6    |
| hsa-miR-124-3p | KLHL24  |
| hsa-miR-124-3p | LAMC1   |
| hsa-miR-124-3p | LRIG1   |
| hsa-miR-124-3p | LRRC1   |
| hsa-miR-124-3p | LRRC58  |
| hsa-miR-124-3p | MAGT1   |
| hsa-miR-124-3p | MAPK14  |
| hsa-miR-124-3p | MYH9    |
| hsa-miR-124-3p | NECAP2  |
| hsa-miR-124-3p | NEK9    |
| hsa-miR-124-3p | NID1    |
| hsa-miR-124-3p | NKAP    |
| hsa-miR-124-3p | NR4A1   |
| hsa-miR-124-3p | NSUN2   |
| hsa-miR-124-3p | NT5E    |

|        |              |
|--------|--------------|
| SOX2   | AJAP1        |
| PRDM14 | ATP10A       |
| STAT6  | C10orf91     |
| GATA2  | AK2          |
| SOX2   | ALCAM        |
| STAT1  | ANKS1A       |
| ESR1   | ANXA11       |
| EGR1   | BCR          |
| RB1    | AKR1A1       |
| RXRA   | ALDH1A1      |
| RB1    | ARHGEF19     |
| HNF1A  | AKR1C4       |
| HNF4A  | CYP2D6       |
| CTCF   | LOC102724203 |
| STAT1  | AC005276.1   |
| TP53   | AJAP1        |
| EGR1   | C9orf106     |
| TP53   | FDPSP1       |
| EGR1   | KLF3         |
| RBL2   | LINC00337    |
| ESR1   | MDS2         |
| EPAS1  | MTND6P7      |
| STAT1  | MYRFL        |
| RBL2   | RNU1-7P      |
| MITF   | RNU5E-4P     |
| ESR1   | RNU6-40P     |
| BACH1  | RNU6-607P    |
| PRDM14 | RNU6-793P    |
| ESR1   | RNU6-880P    |
| ESR1   | RNU6-880P    |
| TP53   | RNU6-965P    |

|             |                 |
|-------------|-----------------|
| BRCA1       | hsa-miR-146a    |
| BRCA1       | hsa-miR-146b    |
| calcineurin | hsa-miR-133a    |
| calcineurin | hsa-miR-133b    |
| cAMP        | hsa-miR-155     |
| CCND1       | hsa-miR-17-5p   |
| CCND1       | hsa-miR-17      |
| CCND1       | hsa-miR-20a     |
| CDK         | hsa-miR-449a    |
| CDK         | hsa-miR-449b    |
| CDKN2A      | hsa-miR-410     |
| c-myb       | hsa-miR-15a     |
| CTNNB1      | hsa-miR-371     |
| CTNNB1      | hsa-miR-372     |
| CTNNB1      | hsa-miR-373     |
| DDX5        | hsa-miR-1       |
| DDX5        | hsa-miR-205-5p  |
| DDX5        | hsa-miR-340-5p  |
| DDX5        | hsa-miR-182     |
| DDX5        | hsa-miR-21      |
| E2F3        | hsa-let-7a      |
| E2F3        | hsa-let-7i      |
| E2F3        | hsa-miR-106b    |
| E2F3        | hsa-miR-15a     |
| E2F3        | hsa-miR-15b     |
| E2F3        | hsa-miR-16      |
| E2F3        | hsa-miR-195     |
| E2F3        | hsa-miR-34a     |
| E2F6        | hsa-let-7b-5p   |
| E2F6        | hsa-miR-137     |
| E2F6        | hsa-miR-193a-3p |

|                |         |
|----------------|---------|
| hsa-miR-124-3p | OAF     |
| hsa-miR-124-3p | OSBPL8  |
| hsa-miR-124-3p | PAPSS2  |
| hsa-miR-124-3p | PARP16  |
| hsa-miR-124-3p | PGRMC2  |
| hsa-miR-124-3p | PI4K2B  |
| hsa-miR-124-3p | PIK3C2A |
| hsa-miR-124-3p | PLEKHF2 |
| hsa-miR-124-3p | PLSCR3  |
| hsa-miR-124-3p | PLXNB2  |
| hsa-miR-124-3p | POGLUT1 |
| hsa-miR-124-3p | PPP1R3B |
| hsa-miR-124-3p | PRPS1   |
| hsa-miR-124-3p | PRRX1   |
| hsa-miR-124-3p | PSKH1   |
| hsa-miR-124-3p | PTBP1   |
| hsa-miR-124-3p | PTBP3   |
| hsa-miR-124-3p | PTPN12  |
| hsa-miR-124-3p | PTPN9   |
| hsa-miR-124-3p | PTPRJ   |
| hsa-miR-124-3p | QKI     |
| hsa-miR-124-3p | QSOX1   |
| hsa-miR-124-3p | RAB34   |
| hsa-miR-124-3p | RAB38   |
| hsa-miR-124-3p | RBM24   |
| hsa-miR-124-3p | RBM47   |
| hsa-miR-124-3p | RDH10   |
| hsa-miR-124-3p | RELA    |
| hsa-miR-124-3p | RFFL    |
| hsa-miR-124-3p | RHBDF1  |
| hsa-miR-124-3p | RHOG    |

|        |             |
|--------|-------------|
| PRDM14 | RNU7-155P   |
| STAT1  | RPL3P6      |
| EGR1   | RTEL1       |
| EGR1   | SLC19A1     |
| FOXA1  | snoMBII-202 |
| STAT1  | SNORA31     |
| FOXA1  | SNORD45     |
| PRDM14 | snoU13      |
| PRDM14 | TXNL1P1     |
| FOXA1  | U3          |
| PRDM14 | U3          |
| STAT1  | Y_RNA       |
| GATA2  | ZBTB8B      |
| SOX2   | 5S_rRNA     |
| STAT1  | A4GALT      |
| RB1    | AADACL4     |
| TP53   | AADACL4     |
| TRIM28 | AADACL4     |
| STAT1  | AAK1        |
| SOX2   | AAMDC       |
| STAT1  | ABCA1       |
| TAL1   | ABCA4       |
| EPAS1  | ABCB6       |
| SOX2   | ABCB7       |
| FOS    | ABCB8       |
| NFE2L2 | ABCC1       |
| RXRA   | ABCC2       |
| HIF1A  | ABHD17C     |
| FOS    | ABHD2       |
| EGR1   | ABL1        |
| ZNF263 | ABL1        |

|        |                 |
|--------|-----------------|
| E2F6   | hsa-miR-98-5p   |
| EGFR   | hsa-miR-133a-3p |
| EGFR   | hsa-miR-133b    |
| EGFR   | hsa-miR-27a-3p  |
| EGFR   | hsa-miR-21      |
| EGR3   | hsa-miR-195     |
| EIF2C2 | hsa-let-7a      |
| EIF2C2 | hsa-let-7b      |
| EIF2C2 | hsa-let-7c      |
| EIF2C2 | hsa-let-7d      |
| EIF2C2 | hsa-let-7e      |
| EIF2C2 | hsa-let-7f      |
| EIF2C2 | hsa-let-7g      |
| EIF2C2 | hsa-let-7i      |
| EP300  | hsa-miR-141     |
| EP300  | hsa-miR-200c    |
| ERS1   | hsa-miR-106a    |
| ERS1   | hsa-miR-17      |
| ERS1   | hsa-miR-18a     |
| ERS1   | hsa-miR-18b     |
| ERS1   | hsa-miR-19a     |
| ERS1   | hsa-miR-19b     |
| ERS1   | hsa-miR-19b-2   |
| ERS1   | hsa-miR-20a     |
| ERS1   | hsa-miR-20b     |
| ERS1   | hsa-miR-21      |
| ERS1   | hsa-miR-22      |
| ERS1   | hsa-miR-221     |
| ERS1   | hsa-miR-222     |
| ERS1   | hsa-miR-363     |
| ERS1   | hsa-miR-92a     |

|                |          |
|----------------|----------|
| hsa-miR-124-3p | RNPEPL1  |
| hsa-miR-124-3p | SBNO2    |
| hsa-miR-124-3p | SCAMP2   |
| hsa-miR-124-3p | SERTAD2  |
| hsa-miR-124-3p | SERTAD4  |
| hsa-miR-124-3p | SGK1     |
| hsa-miR-124-3p | SGMS1    |
| hsa-miR-124-3p | SGPL1    |
| hsa-miR-124-3p | SIX4     |
| hsa-miR-124-3p | SLC16A1  |
| hsa-miR-124-3p | SLC17A5  |
| hsa-miR-124-3p | SLC29A1  |
| hsa-miR-124-3p | SLC30A7  |
| hsa-miR-124-3p | SLC35G1  |
| hsa-miR-124-3p | SMAD5    |
| hsa-miR-124-3p | SNX18    |
| hsa-miR-124-3p | SOS2     |
| hsa-miR-124-3p | SP1      |
| hsa-miR-124-3p | SSFA2    |
| hsa-miR-124-3p | STOM     |
| hsa-miR-124-3p | STT3A    |
| hsa-miR-124-3p | SYPL1    |
| hsa-miR-124-3p | TARBP1   |
| hsa-miR-124-3p | TFEB     |
| hsa-miR-124-3p | TJP2     |
| hsa-miR-124-3p | TMEM109  |
| hsa-miR-124-3p | TMEM184B |
| hsa-miR-124-3p | TOM1L1   |
| hsa-miR-124-3p | TOR3A    |
| hsa-miR-124-3p | TP53INP1 |
| hsa-miR-124-3p | TPST2    |

|         |            |
|---------|------------|
| STAT1   | AC026797.1 |
| EGR1    | AC099522.3 |
| HNF4A   | ACAP3      |
| RBL2    | ACAP3      |
| CEBPA   | ACAP3      |
| ETS1    | ACAP3      |
| MITF    | ACAP3      |
| RB1     | ACAP3      |
| SMARCA4 | ACAP3      |
| TP53    | ACBD6      |
| EGR1    | ACHE       |
| TAL1    | ACOT11     |
| CTCF    | ACOT7      |
| GATA3   | ACOT7      |
| RB1     | ACOT7      |
| PRDM14  | ACOX3      |
| RUNX1   | ACSF3      |
| ESR1    | ACSL5      |
| ESR1    | ACSM6      |
| FOS     | ACTA1      |
| JUN     | ACTA1      |
| SP1     | ACTA1      |
| NFYB    | ACTB       |
| SRF     | ACTB       |
| SRF     | ACTC1      |
| FOS     | ACTL6A     |
| HIF1A   | ACTL7B     |
| RB1     | ACTL8      |
| STAT1   | ACTN4      |
| ZNF263  | ACVR1      |
| GATA4   | ADA        |

|            |                |
|------------|----------------|
| ERS1       | hsa-miR-92a-2  |
| ETS2       | hsa-miR-196b   |
| ETV5       | hsa-miR-21     |
| EZH2       | hsa-miR-101-3p |
| EZH2       | hsa-miR-138-5p |
| EZH2       | hsa-miR-217    |
| EZH2       | hsa-miR-26a-5p |
| EZH2       | hsa-miR-101    |
| Ezh2       | hsa-miR-137    |
| vFLIP- K13 | hsa-miR-146a   |
| FOXJ1      | hsa-miR-449a   |
| Foxo3a     | hsa-miR-21     |
| FOXP3      | hsa-miR-155    |
| FOXP3      | hsa-miR-7      |
| FSH        | hsa-let-7a     |
| FSH        | hsa-miR-143    |
| FSH        | hsa-miR-15b    |
| GATA1      | hsa-miR-144    |
| GATA1      | hsa-miR-451    |
| GNRH1      | hsa-miR-132    |
| GNRH1      | hsa-miR-212    |
| HDAC4      | hsa-miR-1      |
| HDAC4      | hsa-miR-140-5p |
| HDAC4      | hsa-miR-29b-3p |
| HDAC4      | hsa-miR-200a   |
| HMGA1      | hsa-let-7a-5p  |
| HMGA1      | hsa-let-7b-5p  |
| HMGA1      | hsa-miR-98-5p  |
| HMGA1      | hsa-miR-101-2  |
| HMGA1      | hsa-miR-196a-2 |
| HMGA1      | hsa-miR-222    |

|                 |          |
|-----------------|----------|
| hsa-miR-124-3p  | TSC22D4  |
| hsa-miR-124-3p  | TTC7A    |
| hsa-miR-124-3p  | TUB      |
| hsa-miR-124-3p  | TWSG1    |
| hsa-miR-124-3p  | VAMP3    |
| hsa-miR-124-3p  | WIPF1    |
| hsa-miR-124-3p  | ZCCHC24  |
| hsa-miR-125a-5p | ARID3B   |
| hsa-miR-125a-5p | DIP2A    |
| hsa-miR-125a-5p | EIF4EBP1 |
| hsa-miR-125a-5p | ERBB3    |
| hsa-miR-125a-5p | KLF13    |
| hsa-miR-125a-5p | MTUS1    |
| hsa-miR-125a-5p | OSBPL9   |
| hsa-miR-125a-5p | TP53     |
| hsa-miR-125b-5p | ARID3B   |
| hsa-miR-125b-5p | BMF      |
| hsa-miR-125b-5p | ETS1     |
| hsa-miR-125b-5p | IRF4     |
| hsa-miR-125b-5p | KCNS3    |
| hsa-miR-125b-5p | KLF13    |
| hsa-miR-125b-5p | LACTB    |
| hsa-miR-125b-5p | MTF1     |
| hsa-miR-125b-5p | SGPL1    |
| hsa-miR-125b-5p | SLC35A4  |
| hsa-miR-125b-5p | ZFYVE1   |
| hsa-miR-127-3p  | BCL6     |
| hsa-miR-128-3p  | AFF4     |
| hsa-miR-128-3p  | ALDH4A1  |
| hsa-miR-128-3p  | ARHGAP12 |
| hsa-miR-128-3p  | BAG2     |

|        |              |
|--------|--------------|
| NFIA   | ADA          |
| CDX1   | ADA          |
| YY1    | ADA          |
| SOX2   | ADAM28       |
| STAT6  | ADAM8        |
| ESR1   | ADAMTS14     |
| SOX2   | ADAMTS16     |
| BACH1  | ADAMTS17     |
| SOX2   | ADAMTS19     |
| TFAP2C | ADAMTSL3     |
| STAT1  | ADAMTSL4-AS1 |
| STAT6  | ADAMTSL4-AS1 |
| TP53   | ADARB1       |
| STAT1  | ADCK4        |
| TAL1   | ADGRL2       |
| TP53   | ADGRL4       |
| EPAS1  | ADGRV1       |
| EPAS1  | ADM          |
| RELA   | ADORA2A      |
| ESR1   | ADORA3       |
| E2F4   | ADPRHL2      |
| HIF1A  | ADPRHL2      |
| RUNX1  | ADRA1A       |
| STAT1  | ADRA1A       |
| SOX2   | ADRA1B       |
| STAT6  | ADSS         |
| EPAS1  | ADTRP        |
| SOX2   | AFF3         |
| BACH1  | AFG3L1P      |
| ZNF263 | AFG3L2P1     |
| HNF4A  | AFP          |

|          |                 |
|----------|-----------------|
| HMGA1    | hsa-miR-29a     |
| HMGA1    | hsa-miR-331     |
| HNF3A    | hsa-miR-122     |
| HNF3B    | hsa-miR-122     |
| HoxD10   | hsa-miR-7       |
| IFNbeta  | hsa-miR-143     |
| IFNbeta  | hsa-miR-145     |
| IFNgamma | hsa-miR-143     |
| IFNgamma | hsa-miR-145     |
| IL1B     | hsa-miR-146a    |
| IL1B     | hsa-miR-9       |
| IL2      | hsa-miR-182     |
| IL-4     | hsa-miR-29a     |
| IL6      | hsa-miR-148a    |
| IL6      | hsa-miR-152     |
| IL6      | hsa-miR-301a    |
| IL6      | hsa-miR-301b    |
| IL6      | hsa-miR-519c    |
| JAG1     | hsa-miR-21-5p   |
| JAG1     | hsa-miR-143     |
| JAG1     | hsa-miR-145     |
| KAT2B    | hsa-miR-106b-5p |
| KAT2B    | hsa-miR-25-3p   |
| KAT2B    | hsa-miR-32-5p   |
| KAT2B    | hsa-miR-92a-3p  |
| KAT2B    | hsa-miR-93-5p   |
| KAT2B    | hsa-miR-141     |
| KAT2B    | hsa-miR-200c    |
| KDM2A    | hsa-miR-101     |
| KLF2     | hsa-miR-143     |
| KLF2     | hsa-miR-145     |

|                 |         |
|-----------------|---------|
| hsa-miR-128-3p  | EIF2S2  |
| hsa-miR-128-3p  | GPAM    |
| hsa-miR-128-3p  | MOB1B   |
| hsa-miR-128-3p  | NEK2    |
| hsa-miR-128-3p  | RELN    |
| hsa-miR-128-3p  | RNF182  |
| hsa-miR-128-3p  | RPS6KA5 |
| hsa-miR-128-3p  | SEC61A1 |
| hsa-miR-128-3p  | SETD7   |
| hsa-miR-128-3p  | SFXN2   |
| hsa-miR-128-3p  | SH3RF1  |
| hsa-miR-128-3p  | SLC5A3  |
| hsa-miR-128-3p  | TGFBR1  |
| hsa-miR-128-3p  | TMEM30A |
| hsa-miR-128-3p  | TUB     |
| hsa-miR-128-3p  | UBE2W   |
| hsa-miR-128-3p  | VEGFC   |
| hsa-miR-128-3p  | VPS4B   |
| hsa-miR-128-3p  | ZNF652  |
| hsa-miR-129-5p  | SOX4    |
| hsa-miR-129-5p  | BMPR2   |
| hsa-miR-129-5p  | CAMTA1  |
| hsa-miR-129-5p  | ETV6    |
| hsa-miR-129-5p  | FMR1    |
| hsa-miR-129-5p  | GALNT1  |
| hsa-miR-129-5p  | PDS5A   |
| hsa-miR-1297    | TRIB2   |
| hsa-miR-130a-3p | ACVR1   |
| hsa-miR-130a-3p | ATG2B   |
| hsa-miR-130a-3p | BMPR2   |
| hsa-miR-130a-3p | DICER1  |

|         |        |
|---------|--------|
| SRF     | AFP    |
| STAT1   | AGFG1  |
| TFAP2C  | AGFG1  |
| FOS     | AGFG2  |
| E2F4    | AGO1   |
| E2F4    | AGO3   |
| EGR1    | AGPAT3 |
| CTCF    | AGRN   |
| ESR2    | AGRN   |
| MITF    | AGRN   |
| SMARCA4 | AGRN   |
| RUNX1   | AGTR1  |
| RB1     | AGTRAP |
| E2F4    | AGTRAP |
| MITF    | AGTRAP |
| RUNX1   | AGTRAP |
| SMARCA4 | AGTRAP |
| EPAS1   | AHDC1  |
| ESR1    | AHDC1  |
| ESR2    | AHDC1  |
| TP53    | AHDC1  |
| ZNF263  | AHDC1  |
| PRDM14  | AIFM3  |
| EGR1    | AIG1   |
| CTCF    | AJAP1  |
| GATA3   | AJAP1  |
| HNF4A   | AJAP1  |
| SMARCA4 | AJAP1  |
| TAL1    | AJAP1  |
| HIF1A   | AK2    |
| E2F4    | AK2    |

|          |                |
|----------|----------------|
| klf2a    | hsa-miR-126    |
| LEF1     | hsa-miR-34a-5p |
| LEF1     | hsa-miR-371    |
| LEF1     | hsa-miR-372    |
| LEF1     | hsa-miR-373    |
| LIN28    | hsa-let-7a     |
| LIN28    | hsa-let-7b     |
| LIN28    | hsa-let-7c     |
| LIN28    | hsa-let-7d     |
| LIN28    | hsa-let-7e     |
| LIN28    | hsa-let-7f     |
| LIN28    | hsa-let-7g     |
| LIN28    | hsa-let-7i     |
| LIN28B   | hsa-let-7b-5p  |
| LIN28B   | hsa-let-7d-5p  |
| LIN28B   | hsa-let-7a     |
| LIN28B   | hsa-let-7b     |
| LIN28B   | hsa-let-7c     |
| LIN28B   | hsa-let-7d     |
| LIN28B   | hsa-let-7e     |
| LIN28B   | hsa-let-7f     |
| LIN28B   | hsa-let-7g     |
| LIN28B   | hsa-let-7i     |
| LMO2     | hsa-miR-223-3p |
| LMO2     | hsa-miR-142    |
| LPS      | hsa-miR-9-1    |
| MAPK/MK2 | hsa-miR-34c    |
| MAX      | hsa-miR-193a   |
| MECOM    | hsa-miR-1-2    |
| MECP2    | hsa-miR-137    |
| MECP2    | hsa-miR-184    |

|                 |          |
|-----------------|----------|
| hsa-miR-130a-3p | LDLR     |
| hsa-miR-130a-3p | PPARG    |
| hsa-miR-130a-3p | RUNX3    |
| hsa-miR-130a-3p | SMAD5    |
| hsa-miR-130b-3p | ACVR1    |
| hsa-miR-130b-3p | ARHGAP1  |
| hsa-miR-130b-3p | ARHGAP12 |
| hsa-miR-130b-3p | ARID4B   |
| hsa-miR-130b-3p | ARL6IP1  |
| hsa-miR-130b-3p | BLCAP    |
| hsa-miR-130b-3p | C16orf70 |
| hsa-miR-130b-3p | CBFB     |
| hsa-miR-130b-3p | CDK19    |
| hsa-miR-130b-3p | CLIP1    |
| hsa-miR-130b-3p | DDX6     |
| hsa-miR-130b-3p | DICER1   |
| hsa-miR-130b-3p | DYNLL2   |
| hsa-miR-130b-3p | ENPP5    |
| hsa-miR-130b-3p | FBXO28   |
| hsa-miR-130b-3p | GRB10    |
| hsa-miR-130b-3p | HABP4    |
| hsa-miR-130b-3p | HEG1     |
| hsa-miR-130b-3p | HIVEP2   |
| hsa-miR-130b-3p | JARID2   |
| hsa-miR-130b-3p | LDLR     |
| hsa-miR-130b-3p | LRP8     |
| hsa-miR-130b-3p | MB21D2   |
| hsa-miR-130b-3p | MBNL1    |
| hsa-miR-130b-3p | MID1IP1  |
| hsa-miR-130b-3p | MPHOSPH9 |
| hsa-miR-130b-3p | NAA30    |

|         |             |
|---------|-------------|
| FOS     | AK2         |
| RBL2    | AK2         |
| EPAS1   | AK4         |
| TAL1    | AK4         |
| TAL1    | AK5         |
| TFAP2C  | AKAP1       |
| FOXA1   | AKAP6       |
| FOS     | AKAP8L      |
| NFE2L2  | AKR1C1      |
| HNF4A   | AKR1C4      |
| FOS     | AKR1D1      |
| E2F4    | AKR7A2      |
| MITF    | AKR7A2      |
| TFAP2C  | AKT1        |
| TRIM28  | AL109948    |
| STAT6   | AL162377.1  |
| CEBPA   | AL356693.1  |
| HNF4A   | AL356693.1  |
| SMARCA4 | AL356693.1  |
| CTCF    | AL356693.1  |
| ESR1    | AL583842.10 |
| IGF1R   | AL583842.10 |
| PRDM14  | AL583842.10 |
| TP53    | AL583842.5  |
| STAT1   | AL590226.23 |
| CEBPA   | ALB         |
| HNF4A   | ALDH2       |
| STAT6   | ALDH3B2     |
| RBL2    | ALDH4A1     |
| BACH1   | ALDOA       |
| HNF1A   | ALDOB       |

|          |                |
|----------|----------------|
| MRF4     | hsa-miR-1      |
| MRF4     | hsa-miR-133a   |
| MRF4     | hsa-miR-206    |
| MYCN     | hsa-miR-101-3p |
| MYCN     | hsa-miR-202-3p |
| MYCN     | hsa-miR-29a-3p |
| MYCN     | hsa-miR-29b-3p |
| MYCN     | hsa-miR-29c-3p |
| MYCN     | hsa-miR-106a   |
| MYCN     | hsa-miR-17     |
| MYCN     | hsa-miR-18a    |
| MYCN     | hsa-miR-19a    |
| MYCN     | hsa-miR-19b    |
| MYCN     | hsa-miR-20a    |
| MYCN     | hsa-miR-221    |
| MYCN     | hsa-miR-335    |
| MYCN     | hsa-miR-421    |
| MYCN     | hsa-miR-92a    |
| MyoD     | hsa-hsa-miR-1  |
| MyoD     | hsa-miR-1-1    |
| MyoD     | hsa-miR-1-2    |
| MyoD     | hsa-miR-133a   |
| MyoD     | hsa-miR-206    |
| MYOG     | hsa-miR-133a-1 |
| MYOG     | hsa-miR-133a-2 |
| MYOG     | hsa-miR-133b   |
| Myogenin | hsa-miR-1      |
| Myogenin | hsa-miR-133a   |
| Myogenin | hsa-miR-206    |
| NFIB     | hsa-miR-21     |
| NFKB3    | hsa-miR-155    |



|                 |           |
|-----------------|-----------|
| hsa-miR-130b-3p | NCKAP5    |
| hsa-miR-130b-3p | NDEL1     |
| hsa-miR-130b-3p | PPARG     |
| hsa-miR-130b-3p | PPP6R3    |
| hsa-miR-130b-3p | PRKAA1    |
| hsa-miR-130b-3p | PRUNE2    |
| hsa-miR-130b-3p | PSAP      |
| hsa-miR-130b-3p | PTP4A1    |
| hsa-miR-130b-3p | PTPRG     |
| hsa-miR-130b-3p | RAP2C     |
| hsa-miR-130b-3p | RNF145    |
| hsa-miR-130b-3p | RPA2      |
| hsa-miR-130b-3p | RUNX3     |
| hsa-miR-130b-3p | SECISBP2L |
| hsa-miR-130b-3p | SEL1L3    |
| hsa-miR-130b-3p | SERINC3   |
| hsa-miR-130b-3p | SLAIN1    |
| hsa-miR-130b-3p | SLC35D1   |
| hsa-miR-130b-3p | SLC44A1   |
| hsa-miR-130b-3p | SLMAP     |
| hsa-miR-130b-3p | SPATA2    |
| hsa-miR-130b-3p | SPG20     |
| hsa-miR-130b-3p | SYBU      |
| hsa-miR-130b-3p | TGFBR2    |
| hsa-miR-130b-3p | THOP1     |
| hsa-miR-130b-3p | WEE1      |
| hsa-miR-130b-3p | ZBTB4     |
| hsa-miR-130b-3p | ZNF217    |
| hsa-miR-132-3p  | CALU      |
| hsa-miR-132-3p  | CRK       |
| hsa-miR-132-3p  | GTF2H1    |

|        |                 |
|--------|-----------------|
| ESR2   | ALPL            |
| GATA2  | ALPL            |
| RB1    | ALPL            |
| HNF4A  | AMBP            |
| ESR1   | AMPD1           |
| EPAS1  | AMZ1            |
| STAT6  | ANAPC5          |
| EGR1   | ANK1            |
| ZNF263 | ANK1            |
| FOS    | ANKHD1-EIF4EBP3 |
| FOS    | ANKRD11         |
| TP53   | ANKRD13C        |
| RUNX1  | ANKRD20A7P      |
| IGF1R  | ANKRD26P1       |
| FOXA1  | ANKRD29         |
| TP53   | ANKRD45         |
| SOX2   | ANO1            |
| RB1    | ANO7P1          |
| RBL2   | ANO7P1          |
| PRDM14 | ANP32B          |
| RUNX1  | ANXA1           |
| STAT1  | ANXA13          |
| BACH1  | ANXA2P2         |
| STAT1  | ANXA2R          |
| HIF1A  | ANXA4           |
| EPAS1  | AOX2P           |
| FOXA1  | AOX2P           |
| EGR1   | AP1S1           |
| FOS    | AP2A1           |
| SOX2   | AP2A1           |
| SOX2   | AP3B1           |

|        |                 |
|--------|-----------------|
| NKX2-5 | hsa-miR-17      |
| NKX2-5 | hsa-miR-18a     |
| NKX2-5 | hsa-miR-19a     |
| NKX2-5 | hsa-miR-19b     |
| NKX2-5 | hsa-miR-20a     |
| NKX2-5 | hsa-miR-92a     |
| NR1H4  | hsa-miR-34a     |
| NR3B3  | hsa-miR-127     |
| NR3B3  | hsa-miR-433     |
| p27    | hsa-miR-221     |
| p27    | hsa-miR-222     |
| p53    | hsa-miR-200c    |
| PBX3   | hsa-miR-93-5p   |
| PDGF   | hsa-miR-221     |
| PDGF   | hsa-miR-24      |
| PDGF-B | hsa-miR-29a     |
| PDLIM7 | hsa-miR-10b     |
| PLZF   | hsa-miR-146a    |
| POU5F1 | hsa-miR-302a    |
| POU5F1 | hsa-miR-302b    |
| POU5F1 | hsa-miR-302c    |
| POU5F1 | hsa-miR-302d    |
| POU5F1 | hsa-miR-367     |
| PPARG  | hsa-miR-130a-3p |
| PPARG  | hsa-miR-130b-3p |
| PPARG  | hsa-miR-27b-3p  |
| PRKCA  | hsa-miR-15a     |
| PTEN   | hsa-miR-19a-3p  |
| PTEN   | hsa-miR-19b-3p  |
| Pten   | hsa-miR-217     |
| PTEN   | hsa-miR-26a-5p  |

|                 |         |
|-----------------|---------|
| hsa-miR-132-3p  | OSBPL8  |
| hsa-miR-132-3p  | PSMD12  |
| hsa-miR-132-3p  | RASA1   |
| hsa-miR-132-3p  | TJAP1   |
| hsa-miR-133a-3p | CNN2    |
| hsa-miR-133a-3p | EGFR    |
| hsa-miR-133a-3p | FTL     |
| hsa-miR-133a-3p | LASP1   |
| hsa-miR-133a-3p | SEC61B  |
| hsa-miR-133a-3p | TAGLN2  |
| hsa-miR-133b    | BCL2L2  |
| hsa-miR-133b    | CDK13   |
| hsa-miR-133b    | EGFR    |
| hsa-miR-133b    | FAIM    |
| hsa-miR-133b    | PTPRK   |
| hsa-miR-135a-5p | JAK2    |
| hsa-miR-135a-5p | NR3C2   |
| hsa-miR-135b-5p | KLF4    |
| hsa-miR-137     | CDK6    |
| hsa-miR-137     | E2F6    |
| hsa-miR-137     | MITF    |
| hsa-miR-138-5p  | ARHGEF3 |
| hsa-miR-138-5p  | EID1    |
| hsa-miR-138-5p  | EZH2    |
| hsa-miR-138-5p  | RARA    |
| hsa-miR-138-5p  | RHOC    |
| hsa-miR-139-5p  | FOS     |
| hsa-miR-140-5p  | FGF9    |
| hsa-miR-140-5p  | HDAC4   |
| hsa-miR-140-5p  | IGFBP5  |
| hsa-miR-140-5p  | VEGFA   |

|         |             |
|---------|-------------|
| STAT1   | AP4S1       |
| RUNX1   | API5        |
| E2F4    | APITD1      |
| ESR2    | APITD1      |
| ETS1    | APITD1      |
| HNF4A   | APITD1      |
| RB1     | APITD1      |
| RBL2    | APITD1      |
| SMARCA4 | APITD1      |
| CTCF    | APITD1-CORT |
| HNF4A   | APOA1       |
| RXRA    | APOA1       |
| HNF4A   | APOA2       |
| HNF4A   | APOA4       |
| HNF4A   | APOA5       |
| ZNF263  | APOBEC3D    |
| HNF4A   | APOC2       |
| HNF4A   | APOC3       |
| RXRA    | APOC3       |
| CTCF    | APP         |
| SOX2    | APP         |
| EPAS1   | APPL2       |
| SOX2    | AQP2        |
| TRIM28  | ARF1        |
| EPAS1   | ARF1P3      |
| SOX2    | ARFGEF1     |
| HIF1A   | ARFGEF2     |
| FOXA1   | ARFGEF3     |
| STAT1   | ARHGAP19    |
| ESR1    | ARHGEF10L   |
| RUNX1   | ARHGEF12    |

|         |                |
|---------|----------------|
| PTEN    | hsa-miR-29a-3p |
| PTEN    | hsa-miR-29b-3p |
| PTEN    | hsa-miR-19a    |
| PTEN    | hsa-miR-21     |
| PTEN    | hsa-miR-22     |
| PTEN    | hsa-miR-25     |
| PTEN    | hsa-miR-302a   |
| PTEN    | hsa-miR-302b   |
| PTEN    | hsa-miR-302c   |
| PTEN    | hsa-miR-302d   |
| PTEN    | hsa-miR-302f   |
| RAS/ERK | hsa-miR-21     |
| Rb      | hsa-miR-449a   |
| Rb      | hsa-miR-449b   |
| REL     | hsa-miR-21     |
| Rex1    | hsa-miR-302a   |
| Rex1    | hsa-miR-302b   |
| Rex1    | hsa-miR-302c   |
| Rex1    | hsa-miR-302d   |
| Rex1    | hsa-miR-367    |
| RUNX2   | hsa-miR-30a-5p |
| RUNX2   | hsa-miR-30b-5p |
| RUNX2   | hsa-miR-30d-5p |
| RUNX2   | hsa-miR-23a    |
| RUNX2   | hsa-miR-24-2   |
| RUNX2   | hsa-miR-27a    |
| RUNX2   | hsa-miR-2861   |
| RUNX2   | hsa-miR-3960   |
| SF2/ASF | hsa-miR-221    |
| SF2/ASF | hsa-miR-222    |
| SF2/ASF | hsa-miR-7      |

|                 |         |
|-----------------|---------|
| hsa-miR-141-3p  | BRD3    |
| hsa-miR-141-3p  | KLF11   |
| hsa-miR-141-3p  | TGFB2   |
| hsa-miR-141-3p  | YWHAG   |
| hsa-miR-141-3p  | ZEB1    |
| hsa-miR-141-3p  | ZEB2    |
| hsa-miR-142-3p  | ARNTL   |
| hsa-miR-142-3p  | C5orf24 |
| hsa-miR-142-3p  | C9orf72 |
| hsa-miR-142-3p  | ITGAV   |
| hsa-miR-142-3p  | MORF4L2 |
| hsa-miR-142-3p  | SLC35F5 |
| hsa-miR-143-3p  | KRAS    |
| hsa-miR-143-3p  | MYO6    |
| hsa-miR-144-3p  | NFE2L2  |
| hsa-miR-145-5p  | ABRACL  |
| hsa-miR-145-5p  | AP1G1   |
| hsa-miR-145-5p  | FSCN1   |
| hsa-miR-145-5p  | FZD7    |
| hsa-miR-145-5p  | MYO5A   |
| hsa-miR-145-5p  | MYO6    |
| hsa-miR-145-5p  | RTKN    |
| hsa-miR-145-5p  | SERINC5 |
| hsa-miR-145-5p  | SRGAP1  |
| hsa-miR-145-5p  | TMEM9B  |
| hsa-miR-145-5p  | TPM3    |
| hsa-miR-146a-5p | IRAK1   |
| hsa-miR-146a-5p | TRAF6   |
| hsa-miR-146b-5p | IRAK1   |
| hsa-miR-146b-5p | MMP16   |
| hsa-miR-146b-5p | TRAF6   |

|        |          |
|--------|----------|
| CTCF   | ARHGEF16 |
| EGR1   | ARHGEF16 |
| ESR2   | ARHGEF16 |
| HNF4A  | ARHGEF16 |
| RBL2   | ARHGEF16 |
| STAT6  | ARHGEF17 |
| CTCF   | ARHGEF19 |
| ESR1   | ARHGEF19 |
| ETS1   | ARHGEF19 |
| MITF   | ARHGEF19 |
| STAT1  | ARHGEF3  |
| TP53   | ARHGEF7  |
| E2F4   | ARID1A   |
| RB1    | ARID1A   |
| RBL2   | ARID1A   |
| HIF1A  | ARID1B   |
| FOS    | ARID4A   |
| ESR1   | ARID5B   |
| STAT6  | ARID5B   |
| ESR1   | ARL3     |
| HIF1A  | ARL4A    |
| PRDM14 | ARL4C    |
| HIF1A  | ARL6     |
| HIF1A  | ARRDC3   |
| SOX2   | ARRDC3   |
| STAT6  | ARRDC4   |
| BACH1  | ASAP1    |
| ESR1   | ASAP3    |
| GATA3  | ASAP3    |
| RB1    | ASAP3    |
| ESR1   | ASB13    |

|         |                |
|---------|----------------|
| SHP     | hsa-miR-127    |
| SHP     | hsa-miR-433    |
| SIP1    | hsa-miR-141    |
| SIP1    | hsa-miR-200a   |
| SIP1    | hsa-miR-200b   |
| SIP1    | hsa-miR-200c   |
| SIP1    | hsa-miR-429    |
| SIX1    | hsa-miR-185-5p |
| SIX1    | hsa-miR-200a   |
| SIX1    | hsa-miR-200b   |
| SIX1    | hsa-miR-200c   |
| SLUG    | hsa-hsa-miR-1  |
| SLUG    | hsa-miR-200a   |
| SLUG    | hsa-miR-200b   |
| SLUG    | hsa-miR-200c   |
| SMAD4   | hsa-miR-143    |
| SMAD4   | hsa-miR-145    |
| SMAD4   | hsa-miR-155    |
| SMG-1   | hsa-miR-155    |
| SOX9    | hsa-miR-140    |
| sox9a   | hsa-miR-140    |
| SPLUNC1 | hsa-miR-141    |
| Src     | hsa-miR-143    |
| Src     | hsa-miR-145    |
| STAT5   | hsa-miR-15a    |
| STAT5   | hsa-miR-15b    |
| STAT5   | hsa-miR-16     |
| STAT5   | hsa-miR-17     |
| STAT5   | hsa-miR-18a    |
| STAT5   | hsa-miR-195    |
| STAT5   | hsa-miR-19a    |

|                 |           |
|-----------------|-----------|
| hsa-miR-148a-3p | ACVR1     |
| hsa-miR-148a-3p | BTBD3     |
| hsa-miR-148a-3p | CDK19     |
| hsa-miR-148a-3p | DNMT1     |
| hsa-miR-148a-3p | GPATCH8   |
| hsa-miR-148a-3p | LBR       |
| hsa-miR-148a-3p | RAB34     |
| hsa-miR-148a-3p | RASSF8    |
| hsa-miR-148a-3p | RPS6KA5   |
| hsa-miR-148a-3p | SECISBP2L |
| hsa-miR-148a-3p | SESTD1    |
| hsa-miR-148a-3p | SNAPIN    |
| hsa-miR-148a-3p | TMED7     |
| hsa-miR-148a-3p | TMEM9B    |
| hsa-miR-148a-3p | TNRC6A    |
| hsa-miR-148b-3p | ABCB7     |
| hsa-miR-148b-3p | ARL8B     |
| hsa-miR-148b-3p | BTBD3     |
| hsa-miR-148b-3p | CUL5      |
| hsa-miR-148b-3p | CYB5R4    |
| hsa-miR-148b-3p | DCP2      |
| hsa-miR-148b-3p | DNMT1     |
| hsa-miR-148b-3p | ITGA5     |
| hsa-miR-148b-3p | ITSN2     |
| hsa-miR-148b-3p | KLF6      |
| hsa-miR-148b-3p | MARCH2    |
| hsa-miR-148b-3p | NPEPL1    |
| hsa-miR-148b-3p | OSBPL11   |
| hsa-miR-148b-3p | RTN4      |
| hsa-miR-148b-3p | SESTD1    |
| hsa-miR-148b-3p | SYNCRIP   |

|         |            |
|---------|------------|
| STAT1   | ASB4       |
| FOS     | ASF1B      |
| TP53    | ASH1L      |
| ZNF263  | ASL        |
| SOX2    | ASNS       |
| STAT1   | ASS1P6     |
| PRDM14  | ASXL1      |
| E2F4    | ATAD3A     |
| MITF    | ATAD3A     |
| RBL2    | ATAD3A     |
| SMARCA4 | ATAD3A     |
| E2F4    | ATAD3B     |
| RB1     | ATAD3B     |
| STAT6   | ATN1       |
| E2F4    | ATP13A2    |
| ETS1    | ATP13A2    |
| RB1     | ATP13A2    |
| ESR1    | ATP1A1     |
| STAT6   | ATP1A1-AS1 |
| SP1     | ATP1A3     |
| SP3     | ATP1A3     |
| SP4     | ATP1A3     |
| ZNF263  | ATP4A      |
| FOS     | ATP5B      |
| STAT6   | ATP5G1     |
| ESR1    | ATP5G1P7   |
| ESR1    | ATP6V0B    |
| HIF1A   | ATP6V1G3   |
| STAT1   | ATP8B2     |
| TFAP2C  | ATP9A      |
| RB1     | ATPAF1     |

|          |                |
|----------|----------------|
| STAT5    | hsa-miR-19b-1  |
| STAT5    | hsa-miR-20a    |
| STAT5    | hsa-miR-92a-1  |
| SUZ12    | hsa-miR-19a-3p |
| TCF12    | hsa-miR-204-5p |
| TCF12    | hsa-miR-211-5p |
| TGFB1    | hsa-let-7d     |
| TGFB1    | hsa-miR-141    |
| TGFB1    | hsa-miR-143    |
| TGFB1    | hsa-miR-146a   |
| TGFB1    | hsa-miR-155    |
| TGFB1    | hsa-miR-181b-1 |
| TGFB1    | hsa-miR-181b-2 |
| TGFB1    | hsa-miR-192    |
| TGFB1    | hsa-miR-194    |
| TGFB1    | hsa-miR-200a   |
| TGFB1    | hsa-miR-200b   |
| TGFB1    | hsa-miR-200c   |
| TGFB1    | hsa-miR-205    |
| TGFB1    | hsa-miR-224    |
| TGFB1    | hsa-miR-23a    |
| TGFB1    | hsa-miR-24     |
| TGFB1    | hsa-miR-27a    |
| TGFB1    | hsa-miR-29a    |
| TGFB1    | hsa-miR-429    |
| Thrombin | hsa-miR-222    |
| TLR2     | hsa-miR-125a   |
| TLR2     | hsa-miR-146a   |
| TLR2     | hsa-miR-9      |
| TLR4     | hsa-miR-9      |
| TLR7     | hsa-miR-9      |

|                 |          |
|-----------------|----------|
| hsa-miR-148b-3p | TBL1XR1  |
| hsa-miR-148b-3p | USP33    |
| hsa-miR-148b-3p | USP48    |
| hsa-miR-148b-3p | VPS37A   |
| hsa-miR-150-5p  | MYB      |
| hsa-miR-152-3p  | DNMT1    |
| hsa-miR-152-3p  | TGFA     |
| hsa-miR-153-3p  | NFE2L2   |
| hsa-miR-155-5p  | ARID2    |
| hsa-miR-155-5p  | BACH1    |
| hsa-miR-155-5p  | CHAF1A   |
| hsa-miR-155-5p  | CREBRF   |
| hsa-miR-155-5p  | ETS1     |
| hsa-miR-155-5p  | FAM135A  |
| hsa-miR-155-5p  | FAR1     |
| hsa-miR-155-5p  | HIVEP2   |
| hsa-miR-155-5p  | HNRNPA3  |
| hsa-miR-155-5p  | IL17RB   |
| hsa-miR-155-5p  | INTS6    |
| hsa-miR-155-5p  | JARID2   |
| hsa-miR-155-5p  | KBTBD2   |
| hsa-miR-155-5p  | LCORL    |
| hsa-miR-155-5p  | LRRC59   |
| hsa-miR-155-5p  | MAP3K10  |
| hsa-miR-155-5p  | MAP3K14  |
| hsa-miR-155-5p  | PKN2     |
| hsa-miR-155-5p  | RCN2     |
| hsa-miR-155-5p  | TAB2     |
| hsa-miR-155-5p  | TLE4     |
| hsa-miR-155-5p  | TP53INP1 |
| hsa-miR-155-5p  | TSHZ3    |

|         |          |
|---------|----------|
| HIF1A   | ATPIF1   |
| RBL2    | ATPIF1   |
| FOXA1   | ATXN7    |
| HIF1A   | ATXN7    |
| SOX2    | AUH      |
| ESR2    | AUNIP    |
| E2F4    | AURKAIP1 |
| ETS1    | AURKAIP1 |
| RB1     | AURKAIP1 |
| RBL2    | AURKAIP1 |
| SMARCA4 | AURKAIP1 |
| USF1    | AVP      |
| USF2    | AVP      |
| EPAS1   | AVPI1    |
| STAT1   | AZIN1    |
| ESR2    | B3GALT6  |
| HNF4A   | B3GALT6  |
| FOXA1   | B3GNT5   |
| HIF1A   | B4GALT5  |
| ESR1    | BAG3     |
| EGR1    | BAG6     |
| EGR1    | BAIAP2   |
| STAT6   | BANP     |
| FOXA1   | BASP1    |
| SP1     | BAX      |
| FOXA1   | BBX      |
| ESR1    | BCAR3    |
| TRIM28  | BCAR3    |
| FOXA1   | BCAS1    |
| TFAP2C  | BCAS1    |
| EPAS1   | BCAS3    |

|         |              |
|---------|--------------|
| TLR8    | hsa-miR-9    |
| TLX     | hsa-miR-9    |
| TLX1    | hsa-miR-17   |
| TLX1    | hsa-miR-18a  |
| TLX1    | hsa-miR-19a  |
| TLX1    | hsa-miR-19b  |
| TLX1    | hsa-miR-20a  |
| TLX1    | hsa-miR-92a  |
| TLX3    | hsa-miR-17   |
| TLX3    | hsa-miR-18a  |
| TLX3    | hsa-miR-19a  |
| TLX3    | hsa-miR-19b  |
| TLX3    | hsa-miR-20a  |
| TLX3    | hsa-miR-92a  |
| TNF     | hsa-miR-17   |
| TNF     | hsa-miR-31   |
| TNF     | hsa-miR-9    |
| TNFSF12 | hsa-miR-1-1  |
| TNFSF12 | hsa-miR-1-2  |
| TNFSF12 | hsa-miR-133a |
| TNFSF12 | hsa-miR-133b |
| TNFSF12 | hsa-miR-146a |
| TNFSF12 | hsa-miR-206  |
| TNFSF12 | hsa-miR-455  |
| TP63    | hsa-miR-181a |
| TP63    | hsa-miR-193a |
| TP63    | hsa-miR-374a |
| TP63    | hsa-miR-519a |
| TP63    | hsa-miR-630  |
| TP73    | hsa-miR-143  |
| TP73    | hsa-miR-145  |

|                |        |
|----------------|--------|
| hsa-miR-155-5p | WEE1   |
| hsa-miR-155-5p | ZNF236 |
| hsa-miR-155-5p | ZNF652 |
| hsa-miR-15a-5p | AKT3   |
| hsa-miR-15a-5p | BTRC   |
| hsa-miR-15a-5p | CCNE1  |
| hsa-miR-15a-5p | DMTF1  |
| hsa-miR-15a-5p | FASN   |
| hsa-miR-15a-5p | HERC6  |
| hsa-miR-15a-5p | RAB9B  |
| hsa-miR-15a-5p | RECK   |
| hsa-miR-15a-5p | VEGFA  |
| hsa-miR-15a-5p | WNT3A  |
| hsa-miR-15b-5p | BTAF1  |
| hsa-miR-15b-5p | CCNE1  |
| hsa-miR-15b-5p | CHEK1  |
| hsa-miR-15b-5p | ETNK1  |
| hsa-miR-15b-5p | PLSCR4 |
| hsa-miR-15b-5p | PPIL1  |
| hsa-miR-15b-5p | RECK   |
| hsa-miR-15b-5p | SEPT2  |
| hsa-miR-15b-5p | SERBP1 |
| hsa-miR-15b-5p | SMAD7  |
| hsa-miR-15b-5p | STXBP1 |
| hsa-miR-15b-5p | SYNJ1  |
| hsa-miR-15b-5p | TMC7   |
| hsa-miR-15b-5p | TMEM43 |
| hsa-miR-15b-5p | VEGFA  |
| hsa-miR-16-5p  | ABL2   |
| hsa-miR-16-5p  | AHCYL2 |
| hsa-miR-16-5p  | AKT3   |

|        |         |
|--------|---------|
| STAT6  | BCAS3   |
| TFAP2C | BCAS3   |
| SOX2   | BCAT1   |
| EPAS1  | BCKDHA  |
| TP53   | BCL10   |
| SOX2   | BCL2    |
| BACH1  | BCL2L11 |
| STAT1  | BCL3    |
| SPI1   | BCL6    |
| STAT1  | BCL6    |
| PRDM14 | BCL7C   |
| TFAP2C | BCL9L   |
| PRDM14 | BCOR    |
| ZNF263 | BCR     |
| ZNF263 | BDH1    |
| EGR1   | BHLHE40 |
| EPAS1  | BHLHE40 |
| HIF1A  | BHLHE40 |
| STAT6  | BIRC3   |
| ZNF263 | BLACE   |
| STAT6  | BLOC1S1 |
| STAT6  | BMF     |
| STAT1  | BMP1    |
| EGR1   | BMP7    |
| FOXA1  | BMP7    |
| TFAP2C | BMP7    |
| TAL1   | BMP8B   |
| EPAS1  | BNIP3   |
| EPAS1  | BNIP3L  |
| FOXA1  | BNIP3P1 |
| SPI1   | BPI     |

|        |                |
|--------|----------------|
| TP73   | hsa-miR-193a   |
| TRIM32 | hsa-let-7a     |
| TRIM32 | hsa-let-7b     |
| TRIM32 | hsa-let-7c     |
| TRIM32 | hsa-let-7d     |
| TRIM32 | hsa-let-7e     |
| TRIM32 | hsa-let-7f     |
| TRIM32 | hsa-let-7g     |
| TRIM32 | hsa-let-7i     |
| TWIST1 | hsa-miR-10b    |
| TWIST1 | hsa-miR-199a-2 |
| TWIST1 | hsa-miR-200a   |
| TWIST1 | hsa-miR-200b   |
| TWIST1 | hsa-miR-200c   |
| TWIST1 | hsa-miR-205    |
| TWIST1 | hsa-miR-214    |
| TWIST1 | hsa-miR-372    |
| TWIST1 | hsa-miR-373    |
| VHL    | hsa-miR-210    |
| XBP1   | hsa-miR-346    |
| ZNF711 | hsa-miR-19b-3p |

|               |          |
|---------------|----------|
| hsa-miR-16-5p | ARHGDI1A |
| hsa-miR-16-5p | ARL3     |
| hsa-miR-16-5p | ASH1L    |
| hsa-miR-16-5p | ATG14    |
| hsa-miR-16-5p | ATP13A3  |
| hsa-miR-16-5p | AXIN2    |
| hsa-miR-16-5p | BTAF1    |
| hsa-miR-16-5p | BTG2     |
| hsa-miR-16-5p | BTRC     |
| hsa-miR-16-5p | C16orf72 |
| hsa-miR-16-5p | C1orf21  |
| hsa-miR-16-5p | C2orf42  |
| hsa-miR-16-5p | CAMSAP1  |
| hsa-miR-16-5p | CAPRIN1  |
| hsa-miR-16-5p | CAPZA2   |
| hsa-miR-16-5p | CASK     |
| hsa-miR-16-5p | CCNE1    |
| hsa-miR-16-5p | CCNT2    |
| hsa-miR-16-5p | CDC37L1  |
| hsa-miR-16-5p | CDCA4    |
| hsa-miR-16-5p | CDK17    |
| hsa-miR-16-5p | CPSF7    |
| hsa-miR-16-5p | CSDE1    |
| hsa-miR-16-5p | CYP26B1  |
| hsa-miR-16-5p | DDX3X    |
| hsa-miR-16-5p | DDX3Y    |
| hsa-miR-16-5p | DMTF1    |
| hsa-miR-16-5p | E2F7     |
| hsa-miR-16-5p | EIF4B    |
| hsa-miR-16-5p | FAM122B  |
| hsa-miR-16-5p | FBXW7    |

|        |           |
|--------|-----------|
| FOXA1  | BRINP2    |
| TFAP2C | BRIP1     |
| RBL2   | BSDC1     |
| TRIM28 | BSND      |
| STAT1  | BST2      |
| ESR1   | BTBD19    |
| RB1    | BTBD19    |
| TRIM28 | BTBD8     |
| RUNX1  | BTD       |
| EPAS1  | BTG1      |
| SOX2   | BTG1      |
| RXRA   | BTG2      |
| Spi1   | BTK       |
| STAT6  | BUB1B     |
| STAT6  | C10orf105 |
| RUNX1  | C10orf107 |
| SOX2   | C10orf126 |
| ESR1   | C10orf35  |
| ESR1   | C10orf71  |
| ESR1   | C10orf90  |
| EPAS1  | C11orf49  |
| RUNX1  | C11orf74  |
| PRDM14 | C12orf5   |
| STAT6  | C12orf57  |
| STAT1  | C14orf132 |
| FOS    | C14orf159 |
| TFAP2C | C14orf159 |
| FOXA1  | C14orf177 |
| STAT1  | C16orf62  |
| EGR1   | C17orf103 |
| EGR1   | C19orf38  |

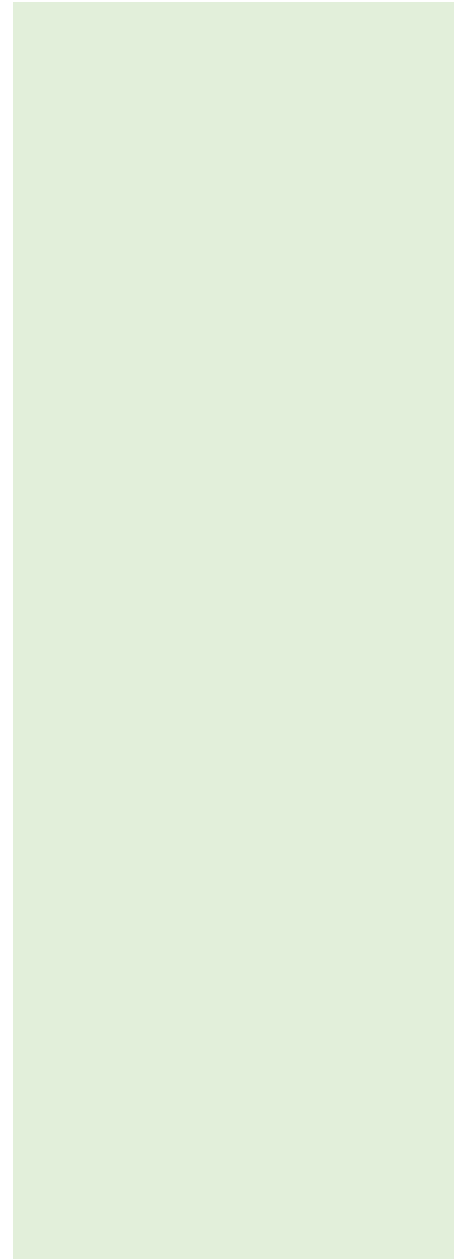

|               |           |
|---------------|-----------|
| hsa-miR-16-5p | FGF2      |
| hsa-miR-16-5p | GABARAPL1 |
| hsa-miR-16-5p | GATAD2A   |
| hsa-miR-16-5p | GLRX      |
| hsa-miR-16-5p | HELZ      |
| hsa-miR-16-5p | HERC6     |
| hsa-miR-16-5p | HSPA4L    |
| hsa-miR-16-5p | IFT74     |
| hsa-miR-16-5p | IPO7      |
| hsa-miR-16-5p | ITGA2     |
| hsa-miR-16-5p | IVNS1ABP  |
| hsa-miR-16-5p | JARID2    |
| hsa-miR-16-5p | KCNN4     |
| hsa-miR-16-5p | KDSR      |
| hsa-miR-16-5p | KIF23     |
| hsa-miR-16-5p | LAMC1     |
| hsa-miR-16-5p | LATS1     |
| hsa-miR-16-5p | LPHN1     |
| hsa-miR-16-5p | LUZP1     |
| hsa-miR-16-5p | LYRM5     |
| hsa-miR-16-5p | MAP7      |
| hsa-miR-16-5p | MGAT4A    |
| hsa-miR-16-5p | MYO5A     |
| hsa-miR-16-5p | N4BP1     |
| hsa-miR-16-5p | NAPG      |
| hsa-miR-16-5p | NISCH     |
| hsa-miR-16-5p | NUP50     |
| hsa-miR-16-5p | OSBPL3    |
| hsa-miR-16-5p | PAFAH1B2  |
| hsa-miR-16-5p | PCMT1     |
| hsa-miR-16-5p | PDE3B     |

|         |          |
|---------|----------|
| ZNF263  | C19orf45 |
| EPAS1   | C1D      |
| TRIM28  | C1orf101 |
| TP53    | C1orf105 |
| RBL2    | C1orf109 |
| EPAS1   | C1orf116 |
| E2F4    | C1orf122 |
| CEBPA   | C1orf127 |
| GATA3   | C1orf127 |
| MITF    | C1orf127 |
| SMARCA4 | C1orf127 |
| TP53    | C1orf141 |
| CTCF    | C1orf159 |
| E2F4    | C1orf159 |
| ESR2    | C1orf159 |
| ETS1    | C1orf159 |
| GATA3   | C1orf159 |
| HNF4A   | C1orf159 |
| MITF    | C1orf159 |
| RB1     | C1orf159 |
| SMARCA4 | C1orf159 |
| TRIM28  | C1orf159 |
| ESR1    | C1orf168 |
| CTCF    | C1orf174 |
| ETS1    | C1orf174 |
| HNF4A   | C1orf174 |
| MITF    | C1orf174 |
| RB1     | C1orf174 |
| RBL2    | C1orf174 |
| SMARCA4 | C1orf174 |
| SOX2    | C1orf174 |





|               |          |
|---------------|----------|
| hsa-miR-16-5p | PDIA6    |
| hsa-miR-16-5p | PKD4     |
| hsa-miR-16-5p | PDLIM5   |
| hsa-miR-16-5p | PHF19    |
| hsa-miR-16-5p | PHKA1    |
| hsa-miR-16-5p | PISD     |
| hsa-miR-16-5p | PLAG1    |
| hsa-miR-16-5p | PLSCR4   |
| hsa-miR-16-5p | PPM1D    |
| hsa-miR-16-5p | PPP1R11  |
| hsa-miR-16-5p | PRDM4    |
| hsa-miR-16-5p | PRKAR2A  |
| hsa-miR-16-5p | PSAT1    |
| hsa-miR-16-5p | PTPN3    |
| hsa-miR-16-5p | RAB9B    |
| hsa-miR-16-5p | RBM6     |
| hsa-miR-16-5p | RECK     |
| hsa-miR-16-5p | RFK      |
| hsa-miR-16-5p | RNF144B  |
| hsa-miR-16-5p | RNF217   |
| hsa-miR-16-5p | SALL1    |
| hsa-miR-16-5p | SEH1L    |
| hsa-miR-16-5p | SERBP1   |
| hsa-miR-16-5p | SHOC2    |
| hsa-miR-16-5p | SIPA1L2  |
| hsa-miR-16-5p | SLC11A2  |
| hsa-miR-16-5p | SLC12A2  |
| hsa-miR-16-5p | SLC39A10 |
| hsa-miR-16-5p | SLC9A6   |
| hsa-miR-16-5p | SMAD7    |
| hsa-miR-16-5p | SNX16    |

|         |           |
|---------|-----------|
| TP53    | C1orf186  |
| RBL2    | C1orf195  |
| ESR2    | C1orf196  |
| RB1     | C1orf196  |
| TP53    | C1orf196  |
| TP53    | C1orf198  |
| TRIM28  | C1orf21   |
| E2F4    | C1orf216  |
| RBL2    | C1orf216  |
| FOS     | C1orf228  |
| STAT6   | C1orf228  |
| TRIM28  | C1orf228  |
| CTCF    | C1orf64   |
| STAT6   | C1orf74   |
| CTCF    | C1orf86   |
| ETS1    | C1orf86   |
| HNF4A   | C1orf86   |
| MITF    | C1orf86   |
| RB1     | C1orf86   |
| RBL2    | C1orf86   |
| SMARCA4 | C1orf86   |
| TAL1    | C1orf87   |
| TRIM28  | C1orf94   |
| GATA3   | C1QA      |
| TRIM28  | C1QA      |
| CEBPB   | C1QTNF3   |
| STAT1   | C1QTNF6   |
| FOXA1   | C1QTNF9B  |
| STAT6   | C1RL      |
| STAT1   | C1S       |
| FOXA1   | C20orf197 |

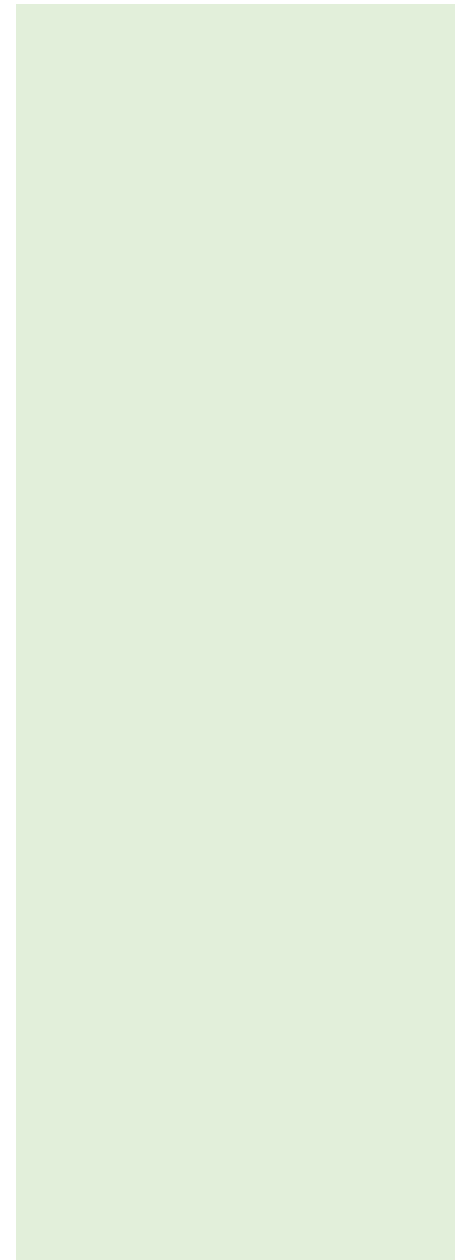

|               |         |
|---------------|---------|
| hsa-miR-16-5p | SOWAHC  |
| hsa-miR-16-5p | SPRED1  |
| hsa-miR-16-5p | SRPR    |
| hsa-miR-16-5p | STK33   |
| hsa-miR-16-5p | STXBP3  |
| hsa-miR-16-5p | SYNJ1   |
| hsa-miR-16-5p | SYPL1   |
| hsa-miR-16-5p | TBP     |
| hsa-miR-16-5p | TLE4    |
| hsa-miR-16-5p | TLK1    |
| hsa-miR-16-5p | TMEM100 |
| hsa-miR-16-5p | TMEM43  |
| hsa-miR-16-5p | TPPP3   |
| hsa-miR-16-5p | TUBA1A  |
| hsa-miR-16-5p | UBE2Q1  |
| hsa-miR-16-5p | UBE2V1  |
| hsa-miR-16-5p | UBE4A   |
| hsa-miR-16-5p | UBFD1   |
| hsa-miR-16-5p | UBN2    |
| hsa-miR-16-5p | USP42   |
| hsa-miR-16-5p | USP9X   |
| hsa-miR-16-5p | VEGFA   |
| hsa-miR-16-5p | VPS4A   |
| hsa-miR-16-5p | WBP11   |
| hsa-miR-16-5p | WEE1    |
| hsa-miR-16-5p | WNT3A   |
| hsa-miR-16-5p | XPO7    |
| hsa-miR-16-5p | YTHDC1  |
| hsa-miR-16-5p | YWHAH   |
| hsa-miR-16-5p | ZBTB34  |
| hsa-miR-16-5p | ZNF622  |

|        |           |
|--------|-----------|
| TFAP2C | C20orf197 |
| ZNF263 | C22orf34  |
| EGR1   | C22orf39  |
| HIF1A  | C2orf47   |
| HIF1A  | C3orf10   |
| EPAS1  | C3orf14   |
| FOXA1  | C3orf14   |
| STAT1  | C3orf58   |
| FOXA1  | C4orf22   |
| EPAS1  | C4orf3    |
| HIF1A  | C4orf3    |
| HIF1A  | C4orf47   |
| FOXA1  | C5orf38   |
| FOXA1  | C5orf47   |
| STAT1  | C5orf56   |
| EGR1   | C7orf50   |
| ZNF263 | C8orf22   |
| EGR1   | C8orf33   |
| FOXA1  | C8orf34   |
| STAT1  | C9orf106  |
| HIF1A  | C9orf156  |
| RUNX1  | C9orf171  |
| FOXA1  | C9orf3    |
| TFAP2C | C9orf3    |
| RUNX1  | C9orf47   |
| SOX2   | C9orf92   |
| FOXA1  | CA2       |
| SOX2   | CA4       |
| CEBPA  | CA6       |
| CTCF   | CA6       |
| ESR1   | CA6       |

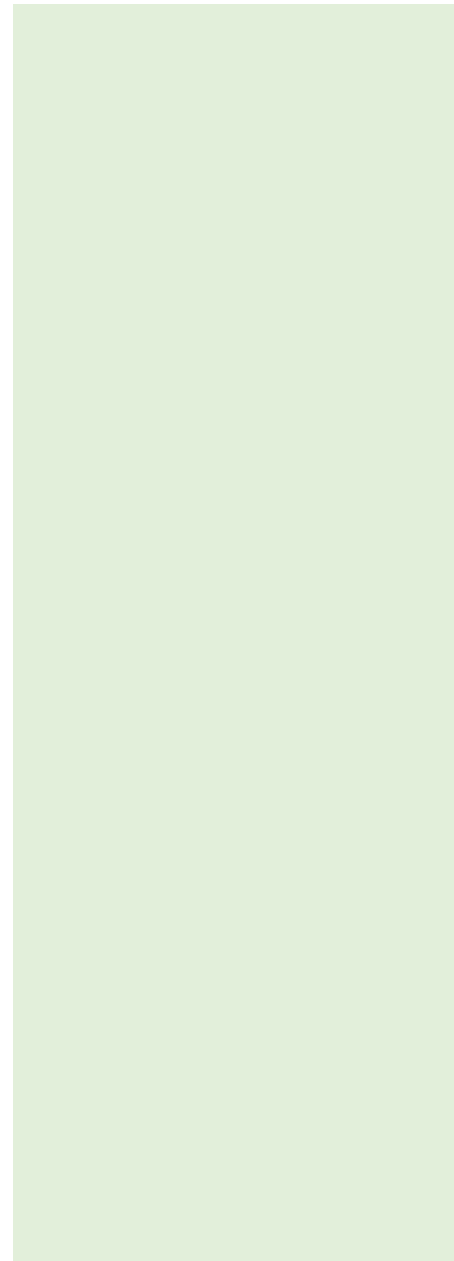

|               |         |
|---------------|---------|
| hsa-miR-16-5p | ZNRF3   |
| hsa-miR-17-3p | SOD2    |
| hsa-miR-17-5p | BMPR2   |
| hsa-miR-17-5p | E2F1    |
| hsa-miR-17-5p | ADARB1  |
| hsa-miR-17-5p | CCND1   |
| hsa-miR-17-5p | DCBLD2  |
| hsa-miR-17-5p | DNAJC27 |
| hsa-miR-17-5p | DPYSL2  |
| hsa-miR-17-5p | ENPP5   |
| hsa-miR-17-5p | FBXO31  |
| hsa-miR-17-5p | HBP1    |
| hsa-miR-17-5p | JAK1    |
| hsa-miR-17-5p | LAPTM4A |
| hsa-miR-17-5p | LCOR    |
| hsa-miR-17-5p | MAP3K12 |
| hsa-miR-17-5p | MAP3K9  |
| hsa-miR-17-5p | NAGK    |
| hsa-miR-17-5p | NAPEPLD |
| hsa-miR-17-5p | NCOA3   |
| hsa-miR-17-5p | NFAT5   |
| hsa-miR-17-5p | NPAS2   |
| hsa-miR-17-5p | PKD2    |
| hsa-miR-17-5p | RAB5B   |
| hsa-miR-17-5p | RB1     |
| hsa-miR-17-5p | RBL2    |
| hsa-miR-17-5p | RBM12B  |
| hsa-miR-17-5p | SEPT2   |
| hsa-miR-17-5p | STK11   |
| hsa-miR-17-5p | TGFBR2  |
| hsa-miR-17-5p | WEE1    |

|         |          |
|---------|----------|
| GATA2   | CA6      |
| GATA3   | CA6      |
| TAL1    | CA6      |
| EPAS1   | CA9      |
| HIF1A   | CA9      |
| FOXA1   | CAB39    |
| STAT1   | CABLES2  |
| ZNF263  | CABLES2  |
| HIF1A   | CACNA1A  |
| EGR1    | CACNA1B  |
| TP53    | CACNA1E  |
| SOX2    | CACNA2D1 |
| SOX2    | CACNB2   |
| STAT1   | CACNB2   |
| STAT1   | CACNG3   |
| STAT6   | CACYBP   |
| BACH1   | CALM1    |
| FOXA1   | CALML5   |
| TFAP2C  | CALML5   |
| CTCF    | CALML6   |
| HNF4A   | CALML6   |
| MITF    | CALML6   |
| SMARCA4 | CALML6   |
| STAT6   | CALML6   |
| ESR1    | CALR4P   |
| STAT6   | CAMK1D   |
| STAT6   | CAMK2G   |
| ETS1    | CAMK2N1  |
| GATA2   | CAMK2N1  |
| GATA3   | CAMK2N1  |
| RB1     | CAMK2N1  |

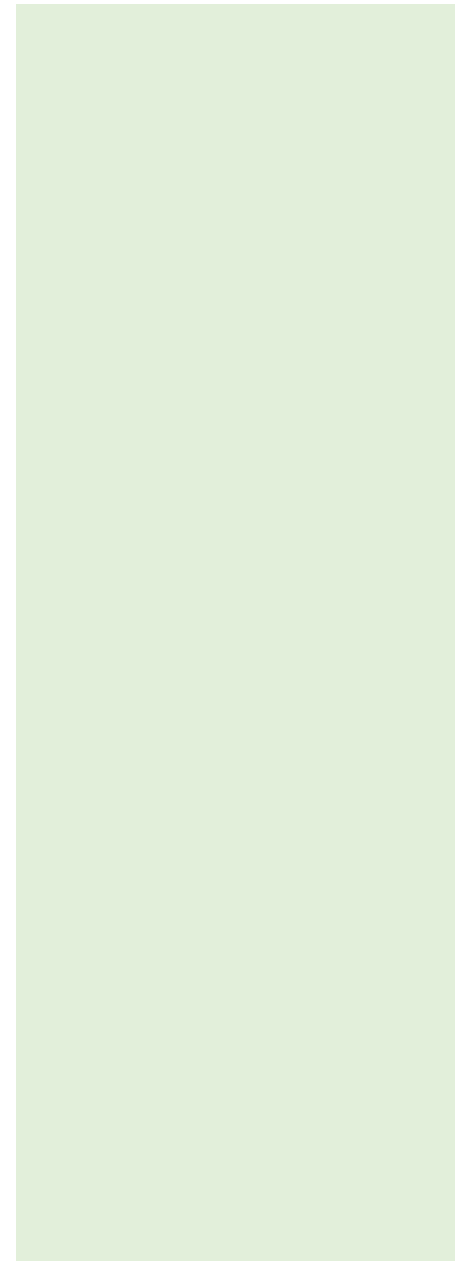

|                 |          |
|-----------------|----------|
| hsa-miR-17-5p   | ZFYVE26  |
| hsa-miR-17-5p   | ZNFX1    |
| hsa-miR-181a-5p | ANKRD13C |
| hsa-miR-181a-5p | ARF6     |
| hsa-miR-181a-5p | ATM      |
| hsa-miR-181a-5p | BTBD3    |
| hsa-miR-181a-5p | COPS2    |
| hsa-miR-181a-5p | DDX3X    |
| hsa-miR-181a-5p | EPHA5    |
| hsa-miR-181a-5p | FAM160A2 |
| hsa-miR-181a-5p | FBXO33   |
| hsa-miR-181a-5p | GPRIN3   |
| hsa-miR-181a-5p | KLF6     |
| hsa-miR-181a-5p | LCLAT1   |
| hsa-miR-181a-5p | LGALS1   |
| hsa-miR-181a-5p | MAP2K1   |
| hsa-miR-181a-5p | METAP1   |
| hsa-miR-181a-5p | MTMR12   |
| hsa-miR-181a-5p | NOTCH2   |
| hsa-miR-181a-5p | NR6A1    |
| hsa-miR-181a-5p | OTUD1    |
| hsa-miR-181a-5p | PLCL2    |
| hsa-miR-181a-5p | PROX1    |
| hsa-miR-181a-5p | RLF      |
| hsa-miR-181a-5p | RNF34    |
| hsa-miR-181a-5p | SCD      |
| hsa-miR-181a-5p | SLC7A11  |
| hsa-miR-181a-5p | SRSF7    |
| hsa-miR-181a-5p | TM9SF3   |
| hsa-miR-181a-5p | TRIM2    |
| hsa-miR-181a-5p | ZFP36L2  |

|         |         |
|---------|---------|
| RBL2    | CAMK2N1 |
| EGR1    | CAMSAP1 |
| CEBPA   | CAMTA1  |
| CTCF    | CAMTA1  |
| E2F4    | CAMTA1  |
| ESR1    | CAMTA1  |
| ESR2    | CAMTA1  |
| GATA2   | CAMTA1  |
| GATA3   | CAMTA1  |
| HNF4A   | CAMTA1  |
| RBL2    | CAMTA1  |
| SMARCA4 | CAMTA1  |
| STAT6   | CAMTA1  |
| TAL1    | CAMTA1  |
| PRDM14  | CANT1   |
| RB1     | CAP1    |
| RBL2    | CAP1    |
| TAL1    | CAP1    |
| TFAP2C  | CAP2    |
| TP53    | CAPN2   |
| ESR1    | CAPZB   |
| ESR2    | CAPZB   |
| ETS1    | CAPZB   |
| GATA2   | CAPZB   |
| MITF    | CAPZB   |
| TAL1    | CAPZB   |
| EGR1    | CARTPT  |
| REST    | CARTPT  |
| ZNF263  | CARTPT  |
| SOX2    | CASP10  |
| ESR1    | CASP7   |

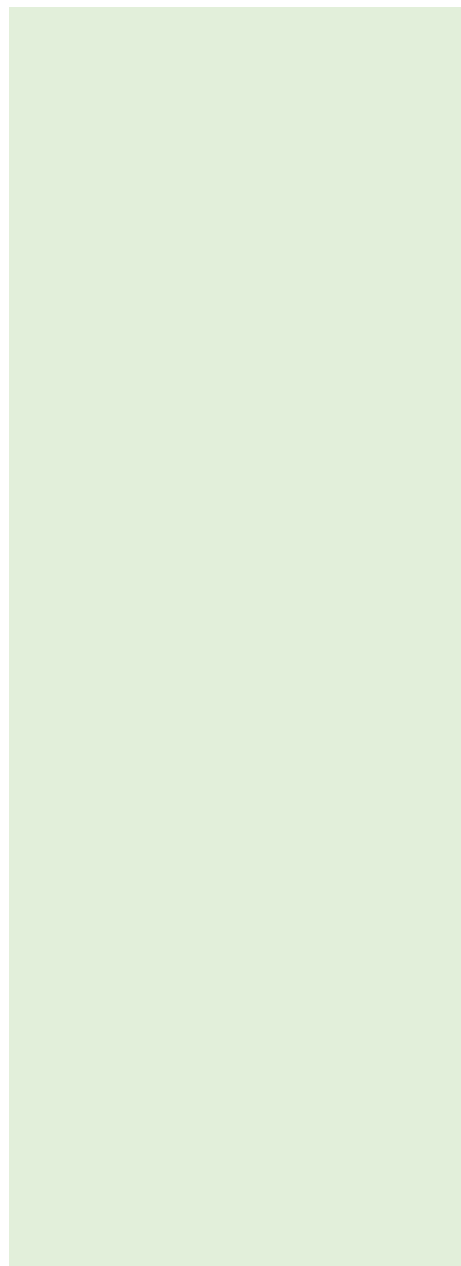

|                 |          |
|-----------------|----------|
| hsa-miR-181a-5p | ZNF594   |
| hsa-miR-181b-5p | C2orf69  |
| hsa-miR-181b-5p | CBX7     |
| hsa-miR-181b-5p | KPNB1    |
| hsa-miR-181b-5p | SEC24C   |
| hsa-miR-181b-5p | ZBTB4    |
| hsa-miR-181c-5p | BTBD3    |
| hsa-miR-181c-5p | NOTCH2   |
| hsa-miR-181c-5p | TRIM2    |
| hsa-miR-182-5p  | EVI5     |
| hsa-miR-182-5p  | FLOT1    |
| hsa-miR-182-5p  | FOXF2    |
| hsa-miR-182-5p  | FOXO3    |
| hsa-miR-182-5p  | LSM14A   |
| hsa-miR-182-5p  | MITF     |
| hsa-miR-182-5p  | RECK     |
| hsa-miR-183-5p  | AKAP12   |
| hsa-miR-183-5p  | ARHGAP21 |
| hsa-miR-183-5p  | CTDSPL   |
| hsa-miR-183-5p  | EZR      |
| hsa-miR-183-5p  | FAM175B  |
| hsa-miR-183-5p  | FOXN2    |
| hsa-miR-183-5p  | FOXO1    |
| hsa-miR-183-5p  | ITGB1    |
| hsa-miR-183-5p  | KLHL24   |
| hsa-miR-183-5p  | NUFIP2   |
| hsa-miR-183-5p  | RCN2     |
| hsa-miR-183-5p  | SH3D19   |
| hsa-miR-183-5p  | SRSF2    |
| hsa-miR-185-5p  | CDC42    |
| hsa-miR-185-5p  | LUZP1    |

|         |          |
|---------|----------|
| STAT1   | CASP7    |
| ETS1    | CASP9    |
| RBL2    | CASP9    |
| RXRA    | CASP9    |
| SMARCA4 | CASP9    |
| ESR1    | CASQ2    |
| TFAP2C  | CASQ2    |
| TP53    | CASQ2    |
| CTCF    | CASZ1    |
| ESR1    | CASZ1    |
| ESR2    | CASZ1    |
| SMARCA4 | CASZ1    |
| TP53    | CASZ1    |
| EGR1    | CATSPER1 |
| PRDM14  | CBFA2T2  |
| EGR1    | CBFA2T3  |
| STAT6   | CBFA2T3  |
| TFAP2C  | CBFA2T3  |
| ZNF263  | CBFA2T3  |
| EGR1    | CBFB     |
| PRDM14  | CBLN2    |
| STAT1   | CBS      |
| STAT6   | CBX1P3   |
| EGR1    | CBX2     |
| RUNX1   | CCBE1    |
| FOXA1   | CCDC170  |
| SOX2    | CCDC171  |
| CEBPA   | CCDC27   |
| E2F4    | CCDC27   |
| HNF4A   | CCDC27   |
| E2F4    | CCDC28B  |



|                |          |
|----------------|----------|
| hsa-miR-185-5p | PBX2     |
| hsa-miR-185-5p | RAE1     |
| hsa-miR-185-5p | SET      |
| hsa-miR-185-5p | SIX1     |
| hsa-miR-185-5p | SMG7     |
| hsa-miR-185-5p | UHMK1    |
| hsa-miR-186-5p | CREBRF   |
| hsa-miR-186-5p | FAM177A1 |
| hsa-miR-186-5p | FNIP1    |
| hsa-miR-186-5p | FOXN2    |
| hsa-miR-186-5p | G2E3     |
| hsa-miR-186-5p | HELZ     |
| hsa-miR-186-5p | KIAA1462 |
| hsa-miR-186-5p | KIF21A   |
| hsa-miR-186-5p | NSD1     |
| hsa-miR-186-5p | PAPD5    |
| hsa-miR-186-5p | RBFOX2   |
| hsa-miR-186-5p | RBM28    |
| hsa-miR-186-5p | RNF2     |
| hsa-miR-186-5p | STAG2    |
| hsa-miR-186-5p | TARDBP   |
| hsa-miR-186-5p | TMEM183A |
| hsa-miR-186-5p | UBE2K    |
| hsa-miR-186-5p | VPS13C   |
| hsa-miR-186-5p | ZFP36L2  |
| hsa-miR-186-5p | ZFP90    |
| hsa-miR-18a-5p | CA13     |
| hsa-miR-18a-5p | CREBL2   |
| hsa-miR-18a-5p | CTGF     |
| hsa-miR-18a-5p | DAAM2    |
| hsa-miR-18a-5p | DICER1   |

|        |         |
|--------|---------|
| RB1    | CCDC28B |
| TP53   | CCDC30  |
| FOXA1  | CCDC47  |
| PRDM14 | CCDC50  |
| EGR1   | CCDC57  |
| FOS    | CCDC61  |
| BACH1  | CCDC64  |
| STAT6  | CCDC77  |
| PRDM14 | CCDC85A |
| EGR1   | CCDC9   |
| DAND5  | CCL2    |
| FOS    | CCL2    |
| NFKB1  | CCL2    |
| STAT1  | CCL2    |
| EGR1   | CCL27   |
| HIF1A  | CCL5    |
| SOX2   | CCND1   |
| E2F1   | CCNE1   |
| HIF1A  | CCNG2   |
| CEBPA  | CCNL2   |
| E2F4   | CCNL2   |
| ETS1   | CCNL2   |
| HNF4A  | CCNL2   |
| RBL2   | CCNL2   |
| HIF1A  | CCNT1   |
| STAT6  | CCNT1   |
| ESR1   | CCNY    |
| IGF1R  | CCNYL3  |
| ZNF263 | CCNYL3  |
| HIF1A  | CCRN4L  |
| FOS    | CCT7    |



|                 |         |        |         |
|-----------------|---------|--------|---------|
| hsa-miR-18a-5p  | GIGYF1  | FOXA1  | CD160   |
| hsa-miR-18a-5p  | HIF1A   | RUNX1  | CD1A    |
| hsa-miR-18a-5p  | MAP7D1  | SPI1   | CD209   |
| hsa-miR-18a-5p  | NR3C1   | STAT6  | CD247   |
| hsa-miR-18a-5p  | PDE4D   | FOS    | CD300LB |
| hsa-miR-18a-5p  | RAB5A   | SPI1   | CD40    |
| hsa-miR-18a-5p  | UBTD2   | Spi1   | CD40    |
| hsa-miR-18b-5p  | GIGYF1  | STAT1  | CD40    |
| hsa-miR-190a-5p | PHLPP1  | NFATC2 | CD40LG  |
| hsa-miR-192-5p  | ARL2BP  | NFAM1  | CD40LG  |
| hsa-miR-192-5p  | DICER1  | TFAP2C | CD55    |
| hsa-miR-192-5p  | LIMS1   | TRIM28 | CD55    |
| hsa-miR-192-5p  | MSN     | ESR1   | CD58    |
| hsa-miR-192-5p  | RB1     | PRDM14 | CD6     |
| hsa-miR-192-5p  | RPAP2   | ELF1   | CD68    |
| hsa-miR-193a-3p | E2F6    | FLI1   | CD68    |
| hsa-miR-193a-3p | MCL1    | IRF4   | CD68    |
| hsa-miR-193a-3p | PTK2    | IRF8   | CD68    |
| hsa-miR-193b-3p | ABI2    | SPI1   | CD68    |
| hsa-miR-193b-3p | CCDC28A | ZNF263 | CD7     |
| hsa-miR-193b-3p | CNOT6   | SOX2   | CD82    |
| hsa-miR-193b-3p | CTDSPL2 | RUNX1  | CD84    |
| hsa-miR-193b-3p | DCAF7   | STAT1  | CD86    |
| hsa-miR-193b-3p | IL17RD  | GATA3  | CDA     |
| hsa-miR-193b-3p | LPCAT1  | STAT1  | CDC14B  |
| hsa-miR-193b-3p | PLAU    | RUNX1  | CDC16   |
| hsa-miR-193b-3p | RSF1    | RBL2   | CDC20   |
| hsa-miR-193b-3p | SEPN1   | STAT6  | CDC27   |
| hsa-miR-193b-3p | STX16   | PRDM14 | CDC27P1 |
| hsa-miR-193b-3p | TGFBR3  | ZNF263 | CDC27P1 |
| hsa-miR-193b-3p | ZBTB5   | EGR1   | CDC27P1 |



|                 |          |
|-----------------|----------|
| hsa-miR-194-5p  | HBEGF    |
| hsa-miR-194-5p  | PTPN12   |
| hsa-miR-195-5p  | CCNE1    |
| hsa-miR-195-5p  | TAB3     |
| hsa-miR-195-5p  | VEGFA    |
| hsa-miR-195-5p  | WEE1     |
| hsa-miR-196a-5p | CCDC47   |
| hsa-miR-196a-5p | HOXA5    |
| hsa-miR-196a-5p | HOXA7    |
| hsa-miR-196a-5p | HOXB7    |
| hsa-miR-196a-5p | HOXC8    |
| hsa-miR-196a-5p | IGDCC4   |
| hsa-miR-196a-5p | IGF2BP3  |
| hsa-miR-196a-5p | SMC3     |
| hsa-miR-196b-5p | HOXC8    |
| hsa-miR-197-3p  | HNRNPD   |
| hsa-miR-199a-5p | CCNL1    |
| hsa-miR-199a-5p | MAP3K11  |
| hsa-miR-199b-5p | HES1     |
| hsa-miR-199b-5p | HIF1A    |
| hsa-miR-19a-3p  | ABCA1    |
| hsa-miR-19a-3p  | ARIH2    |
| hsa-miR-19a-3p  | BMPR2    |
| hsa-miR-19a-3p  | GRK6     |
| hsa-miR-19a-3p  | PSAP     |
| hsa-miR-19a-3p  | PTEN     |
| hsa-miR-19a-3p  | RPS6KA5  |
| hsa-miR-19a-3p  | SUZ12    |
| hsa-miR-19a-3p  | WDFY3    |
| hsa-miR-19b-3p  | ARHGAP12 |
| hsa-miR-19b-3p  | ATF2     |

|        |          |
|--------|----------|
| ETS1   | CDC42    |
| GATA3  | CDC42    |
| RB1    | CDC42    |
| TRIM28 | CDC42BPA |
| STAT1  | CDC42EP2 |
| TAL1   | CDC7     |
| TP53   | CDC7     |
| FOS    | CDCA2    |
| E2F4   | CDCA8    |
| STAT1  | CDCP1    |
| ZEB2   | CDH1     |
| FOXA1  | CDH12    |
| HIF1A  | CDH13    |
| RUNX1  | CDH13    |
| EGR1   | CDH15    |
| FOXA1  | CDH18    |
| PRDM14 | CDH2     |
| SOX2   | CDH2     |
| ESR1   | CDH23    |
| HIF1A  | CDH23    |
| ZNF263 | CDHR3    |
| E2F1   | CDK1     |
| E2F4   | CDK11A   |
| ETS1   | CDK11A   |
| HNF4A  | CDK11A   |
| RB1    | CDK11A   |
| RBL2   | CDK11A   |
| E2F4   | CDK11B   |
| ETS1   | CDK11B   |
| HNF4A  | CDK11B   |
| RB1    | CDK11B   |





|                |          |
|----------------|----------|
| hsa-miR-19b-3p | ATXN7L1  |
| hsa-miR-19b-3p | BLCAP    |
| hsa-miR-19b-3p | BMPR2    |
| hsa-miR-19b-3p | C16orf70 |
| hsa-miR-19b-3p | CAMSAP1  |
| hsa-miR-19b-3p | CCND2    |
| hsa-miR-19b-3p | CCNL1    |
| hsa-miR-19b-3p | CEP350   |
| hsa-miR-19b-3p | CYP2U1   |
| hsa-miR-19b-3p | DDX6     |
| hsa-miR-19b-3p | DMXL2    |
| hsa-miR-19b-3p | E2F8     |
| hsa-miR-19b-3p | ELOVL5   |
| hsa-miR-19b-3p | ENPP5    |
| hsa-miR-19b-3p | FBXO8    |
| hsa-miR-19b-3p | HBP1     |
| hsa-miR-19b-3p | HIPK3    |
| hsa-miR-19b-3p | IMPDH1   |
| hsa-miR-19b-3p | KLF10    |
| hsa-miR-19b-3p | LONRF1   |
| hsa-miR-19b-3p | LRIG3    |
| hsa-miR-19b-3p | MB21D2   |
| hsa-miR-19b-3p | MPHOSPH9 |
| hsa-miR-19b-3p | NCKAP5   |
| hsa-miR-19b-3p | NR3C2    |
| hsa-miR-19b-3p | OTUD1    |
| hsa-miR-19b-3p | PATL1    |
| hsa-miR-19b-3p | PRUNE2   |
| hsa-miR-19b-3p | PSAP     |
| hsa-miR-19b-3p | PTEN     |
| hsa-miR-19b-3p | PTPRG    |

|        |         |
|--------|---------|
| RBL2   | CDK11B  |
| FOS    | CDK2AP2 |
| MYC    | CDK4    |
| BACH1  | CDK6    |
| FOXA1  | CDK6    |
| RUNX1  | CDK6    |
| HIF1A  | CDK7    |
| STAT1  | CDKAL1  |
| TFAP2C | CDKL4   |
| DAND5  | CDKN1A  |
| NFIA   | CDKN1A  |
| TBP    | CDKN1A  |
| EPAS1  | CDKN1B  |
| STAT1  | CDKN1B  |
| RB1    | CDKN2C  |
| RXRA   | CDKN2D  |
| PRDM14 | CDX1    |
| RXRA   | CDX1    |
| FOXA1  | CDYL2   |
| STAT1  | CEBPB   |
| RXRA   | CEBPE   |
| ESR2   | CELA2A  |
| TAL1   | CELA2B  |
| ETS1   | CELA3A  |
| GATA2  | CELA3A  |
| GATA3  | CELA3A  |
| RB1    | CELA3A  |
| RBL2   | CELA3A  |
| ESR1   | CELA3B  |
| ESR2   | CELA3B  |
| GATA2  | CELA3B  |



|                 |           |
|-----------------|-----------|
| hsa-miR-19b-3p  | RAB21     |
| hsa-miR-19b-3p  | RAP2C     |
| hsa-miR-19b-3p  | RASSF2    |
| hsa-miR-19b-3p  | RHEBL1    |
| hsa-miR-19b-3p  | RNF11     |
| hsa-miR-19b-3p  | RNF111    |
| hsa-miR-19b-3p  | RNF145    |
| hsa-miR-19b-3p  | SECISBP2L |
| hsa-miR-19b-3p  | SEMA4C    |
| hsa-miR-19b-3p  | SERINC3   |
| hsa-miR-19b-3p  | SLC4A7    |
| hsa-miR-19b-3p  | SMARCA2   |
| hsa-miR-19b-3p  | SPATA2    |
| hsa-miR-19b-3p  | SPG20     |
| hsa-miR-19b-3p  | SYBU      |
| hsa-miR-19b-3p  | TAF4      |
| hsa-miR-19b-3p  | TMBIM6    |
| hsa-miR-19b-3p  | TRIM33    |
| hsa-miR-19b-3p  | VAMP3     |
| hsa-miR-19b-3p  | WDR26     |
| hsa-miR-19b-3p  | WEE1      |
| hsa-miR-19b-3p  | ZBTB4     |
| hsa-miR-19b-3p  | ZNF217    |
| hsa-miR-19b-3p  | ZNF711    |
| hsa-miR-200a-3p | CCNE2     |
| hsa-miR-200a-3p | KLF11     |
| hsa-miR-200a-3p | ZEB1      |
| hsa-miR-200a-3p | ZEB2      |
| hsa-miR-200b-3p | BAP1      |
| hsa-miR-200b-3p | FN1       |
| hsa-miR-200b-3p | KDR       |

|        |        |
|--------|--------|
| RBL2   | CELA3B |
| TAL1   | CELA3B |
| TP53   | CELA3B |
| ESR1   | CELF2  |
| ESR1   | CELSR2 |
| TFAP2C | CELSR2 |
| FOXA1  | CEMIP  |
| FOS    | CENPA  |
| CEBPA  | CEP104 |
| CTCF   | CEP104 |
| ETS1   | CEP104 |
| RBL2   | CEP104 |
| TRIM28 | CEP170 |
| EGR1   | CEP72  |
| E2F4   | CEP85  |
| GATA2  | CEP85  |
| RB1    | CEP85  |
| RBL2   | CEP85  |
| TRIM28 | CEP85  |
| TRIM28 | CERS2  |
| ESR1   | CFAP57 |
| RB1    | CFAP57 |
| RBL2   | CFAP57 |
| ESR1   | CFAP58 |
| BACH1  | CFAP74 |
| CEBPA  | CFAP74 |
| CTCF   | CFAP74 |
| ESR1   | CFAP74 |
| ESR2   | CFAP74 |
| ETS1   | CFAP74 |
| HNF4A  | CFAP74 |



|                 |        |
|-----------------|--------|
| hsa-miR-200b-3p | VEGFA  |
| hsa-miR-200b-3p | ZEB1   |
| hsa-miR-200b-3p | ZEB2   |
| hsa-miR-200c-3p | BAP1   |
| hsa-miR-200c-3p | ERRFI1 |
| hsa-miR-200c-3p | FN1    |
| hsa-miR-200c-3p | LPAR1  |
| hsa-miR-200c-3p | MSN    |
| hsa-miR-200c-3p | TBK1   |
| hsa-miR-200c-3p | VEGFA  |
| hsa-miR-200c-3p | ZEB1   |
| hsa-miR-200c-3p | ZEB2   |
| hsa-miR-202-3p  | MYCN   |
| hsa-miR-204-5p  | ALPL   |
| hsa-miR-204-5p  | AP1S2  |
| hsa-miR-204-5p  | CCNT2  |
| hsa-miR-204-5p  | EDEM1  |
| hsa-miR-204-5p  | EZR    |
| hsa-miR-204-5p  | FARP1  |
| hsa-miR-204-5p  | FOXC1  |
| hsa-miR-204-5p  | HAS2   |
| hsa-miR-204-5p  | JARID2 |
| hsa-miR-204-5p  | M6PR   |
| hsa-miR-204-5p  | MAPRE2 |
| hsa-miR-204-5p  | RAB22A |
| hsa-miR-204-5p  | TCF12  |
| hsa-miR-204-5p  | TGFBR2 |
| hsa-miR-205-5p  | DDX5   |
| hsa-miR-205-5p  | LAMC1  |
| hsa-miR-205-5p  | MED1   |
| hsa-miR-205-5p  | PRKCE  |

|        |          |
|--------|----------|
| MITF   | CFAP74   |
| STAT1  | CFB      |
| HIF1A  | CGGBP1   |
| TRIM28 | CGN      |
| ESR1   | CHAT     |
| TP53   | CHCHD2P5 |
| CTCF   | CHCHD2P6 |
| STAT6  | CHCHD2P6 |
| HIF1A  | CHCHD6   |
| EPAS1  | CHD1L    |
| HIF1A  | CHD1L    |
| CEBPA  | CHD5     |
| CTCF   | CHD5     |
| ESR1   | CHD5     |
| ESR2   | CHD5     |
| GATA3  | CHD5     |
| HNF4A  | CHD5     |
| MITF   | CHD5     |
| FOXA1  | CHD6     |
| HIF1A  | CHD8     |
| ZNF263 | CHD9     |
| STAT6  | CHFR     |
| TRIM28 | CHI3L1   |
| TP53   | CHI3L2   |
| EGR1   | CHID1    |
| EGR1   | CHMP6    |
| PRDM14 | CHMP7    |
| STAT6  | CHRNA7   |
| REST   | CHRN2    |
| ESR1   | CHST15   |
| STAT6  | CHST15   |



|                 |          |
|-----------------|----------|
| hsa-miR-205-5p  | ZEB1     |
| hsa-miR-206     | GJA1     |
| hsa-miR-206     | BDNF     |
| hsa-miR-206     | MET      |
| hsa-miR-206     | NOTCH3   |
| hsa-miR-206     | PAX3     |
| hsa-miR-206     | UTRN     |
| hsa-miR-208a-3p | ETS1     |
| hsa-miR-208a-3p | MED13    |
| hsa-miR-20a-5p  | ARHGAP12 |
| hsa-miR-20a-5p  | BMPR2    |
| hsa-miR-20a-5p  | BNIP2    |
| hsa-miR-20a-5p  | CEP120   |
| hsa-miR-20a-5p  | E2F1     |
| hsa-miR-20a-5p  | EGLN3    |
| hsa-miR-20a-5p  | HIF1A    |
| hsa-miR-20a-5p  | KIAA1191 |
| hsa-miR-20a-5p  | LYPD6    |
| hsa-miR-20a-5p  | MAP3K12  |
| hsa-miR-20a-5p  | NCOA3    |
| hsa-miR-20a-5p  | NETO2    |
| hsa-miR-20a-5p  | PLEKHM3  |
| hsa-miR-20a-5p  | PPP6R3   |
| hsa-miR-20a-5p  | RB1      |
| hsa-miR-20a-5p  | RBL2     |
| hsa-miR-20a-5p  | RBM12B   |
| hsa-miR-20a-5p  | RUFY2    |
| hsa-miR-20a-5p  | SEPT2    |
| hsa-miR-20a-5p  | STAT3    |
| hsa-miR-20a-5p  | TGFBR2   |
| hsa-miR-20a-5p  | TSG101   |

|        |             |
|--------|-------------|
| EPAS1  | CHSY1       |
| STAT6  | CHURC1-FNTB |
| HIF1A  | CIART       |
| TP53   | CICP13      |
| CEBPA  | CICP3       |
| PRDM14 | CICP9       |
| SOX2   | CIITA       |
| STAT1  | CIITA       |
| STAT6  | CIITA       |
| EPAS1  | CITED2      |
| ESR1   | CITED4      |
| TAL1   | CITED4      |
| TP53   | CITED4      |
| EGR1   | CKAP4       |
| MYF5   | CKM         |
| CTCF   | CLCN6       |
| MITF   | CLCN6       |
| RB1    | CLCN6       |
| CTCF   | CLCNKA      |
| CTCF   | CLCNKB      |
| E2F4   | CLCNKB      |
| PRDM14 | CLDN11      |
| TP53   | CLDN19      |
| STAT1  | CLDN23      |
| FOS    | CLDN9       |
| STAT6  | CLEC16A     |
| HIF1A  | CLEC4C      |
| EGR1   | CLIC4       |
| GATA2  | CLIC4       |
| RB1    | CLIC4       |
| TRIM28 | CLIC4       |



|                |        |
|----------------|--------|
| hsa-miR-20a-5p | UEVLD  |
| hsa-miR-20a-5p | ZNFX1  |
| hsa-miR-20b-5p | ARID4B |
| hsa-miR-20b-5p | HIF1A  |
| hsa-miR-20b-5p | STAT3  |
| hsa-miR-210-3p | FGFRL1 |
| hsa-miR-210-3p | ISCU   |
| hsa-miR-211-5p | RAB22A |
| hsa-miR-211-5p | TCF12  |
| hsa-miR-214-3p | QKI    |
| hsa-miR-215-5p | ARL2BP |
| hsa-miR-215-5p | DICER1 |
| hsa-miR-215-5p | LIMS1  |
| hsa-miR-215-5p | MSN    |
| hsa-miR-215-5p | RB1    |
| hsa-miR-215-5p | RPAP2  |
| hsa-miR-21-5p  | CPEB3  |
| hsa-miR-21-5p  | EDIL3  |
| hsa-miR-21-5p  | EPHA4  |
| hsa-miR-21-5p  | ESYT2  |
| hsa-miR-21-5p  | FAM46A |
| hsa-miR-21-5p  | GLCCI1 |
| hsa-miR-21-5p  | GPR64  |
| hsa-miR-21-5p  | JAG1   |
| hsa-miR-21-5p  | JPH1   |
| hsa-miR-21-5p  | MAP3K1 |
| hsa-miR-21-5p  | MTPN   |
| hsa-miR-21-5p  | PAN3   |
| hsa-miR-21-5p  | PBRM1  |
| hsa-miR-21-5p  | PCBP1  |
| hsa-miR-21-5p  | PELI1  |

|        |         |
|--------|---------|
| HIF1A  | CLIP2   |
| STAT6  | CLN3    |
| STAT6  | CLP1    |
| RUNX1  | CLPTM1L |
| E2F4   | CLSPN   |
| RB1    | CLSPN   |
| RBL2   | CLSPN   |
| TAL1   | CLSPN   |
| CEBPA  | CLSTN1  |
| CTCF   | CLSTN1  |
| GATA3  | CLSTN1  |
| HNF4A  | CLSTN1  |
| MITF   | CLSTN1  |
| RB1    | CLSTN1  |
| RBL2   | CLSTN1  |
| STAT1  | CLSTN2  |
| ZNF263 | CLTCL1  |
| RB1    | CMPK1   |
| STAT1  | CNNM2   |
| FOS    | CNOT1   |
| FOS    | CNOT3   |
| STAT6  | CNPY2   |
| ESR2   | CNR2    |
| GATA3  | CNR2    |
| STAT6  | CNR2    |
| TAL1   | CNR2    |
| TRIM28 | CNR2    |
| FOXA1  | CNST    |
| FOS    | CNTD2   |
| STAT6  | CNTNAP4 |
| RUNX1  | CNTRL   |

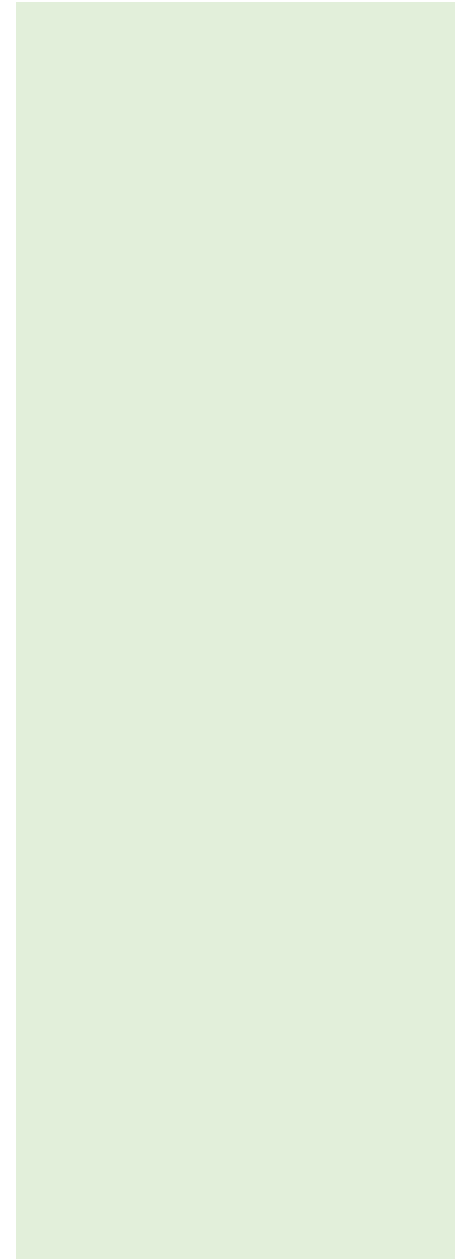

|                |         |
|----------------|---------|
| hsa-miR-21-5p  | PGRMC2  |
| hsa-miR-21-5p  | PLEKHA1 |
| hsa-miR-21-5p  | RALGPS2 |
| hsa-miR-21-5p  | SPRY2   |
| hsa-miR-21-5p  | STAG2   |
| hsa-miR-21-5p  | STAT3   |
| hsa-miR-21-5p  | TGFBI   |
| hsa-miR-21-5p  | TIAM1   |
| hsa-miR-21-5p  | YOD1    |
| hsa-miR-21-5p  | ZNF367  |
| hsa-miR-217    | NR4A2   |
| hsa-miR-217    | EZH2    |
| hsa-miR-217    | KRAS    |
| hsa-miR-217    | PPM1D   |
| hsa-miR-217    | Pten    |
| hsa-miR-217    | SIRT1   |
| hsa-miR-218-5p | BIRC6   |
| hsa-miR-218-5p | GLCE    |
| hsa-miR-218-5p | GPM6A   |
| hsa-miR-218-5p | HECTD2  |
| hsa-miR-218-5p | IKBKB   |
| hsa-miR-218-5p | LASP1   |
| hsa-miR-218-5p | OLIG2   |
| hsa-miR-218-5p | PHC3    |
| hsa-miR-218-5p | RARA    |
| hsa-miR-218-5p | SFRP2   |
| hsa-miR-218-5p | STAM2   |
| hsa-miR-218-5p | TOB1    |
| hsa-miR-218-5p | TPD52   |
| hsa-miR-218-5p | VOPP1   |
| hsa-miR-221-3p | ARID1A  |

|        |         |
|--------|---------|
| STAT6  | CNTROB  |
| RBL2   | COA7    |
| FOXA1  | COBLL1  |
| EGR1   | COG1    |
| TP53   | COG2    |
| TP53   | COL11A1 |
| SOX2   | COL12A1 |
| ESR1   | COL13A1 |
| SOX2   | COL15A1 |
| E2F4   | COL16A1 |
| ESR1   | COL16A1 |
| RB1    | COL16A1 |
| RBL2   | COL16A1 |
| ESR1   | COL17A1 |
| EGR1   | COL18A1 |
| TFAP2C | COL18A1 |
| SP1    | COL1A2  |
| EGR1   | COL23A1 |
| TAL1   | COL24A1 |
| SOX2   | COL4A1  |
| RUNX1  | COL4A2  |
| SOX2   | COL4A5  |
| FOXA1  | COL5A2  |
| EGR1   | COL8A2  |
| STAT1  | COPG1   |
| STAT6  | COPS3   |
| FOS    | COPZ1   |
| STAT6  | CORO2B  |
| ZNF263 | COTL1   |
| STAT1  | COX6CP2 |
| TFAP2C | COX6CP2 |



|                |         |
|----------------|---------|
| hsa-miR-221-3p | CDKN1B  |
| hsa-miR-221-3p | FBXO28  |
| hsa-miR-221-3p | FMR1    |
| hsa-miR-221-3p | HECTD2  |
| hsa-miR-221-3p | KIF16B  |
| hsa-miR-221-3p | KIT     |
| hsa-miR-221-3p | PANK3   |
| hsa-miR-221-3p | POGZ    |
| hsa-miR-221-3p | TIMP3   |
| hsa-miR-222-3p | CDKN1B  |
| hsa-miR-222-3p | DPP8    |
| hsa-miR-222-3p | KIT     |
| hsa-miR-222-3p | PAIP2   |
| hsa-miR-222-3p | PANK3   |
| hsa-miR-222-3p | SUN2    |
| hsa-miR-222-3p | TIMP3   |
| hsa-miR-222-3p | TLE3    |
| hsa-miR-222-3p | YWHAG   |
| hsa-miR-223-3p | FBXW7   |
| hsa-miR-223-3p | HSP90B1 |
| hsa-miR-223-3p | IGF1R   |
| hsa-miR-223-3p | LMO2    |
| hsa-miR-223-3p | MEF2C   |
| hsa-miR-223-3p | RHOB    |
| hsa-miR-223-3p | SMARCD1 |
| hsa-miR-223-3p | SP3     |
| hsa-miR-22-3p  | C5orf24 |
| hsa-miR-22-3p  | H3F3B   |
| hsa-miR-22-3p  | LIN7C   |
| hsa-miR-22-3p  | RAB5B   |
| hsa-miR-224-5p | EYA4    |

|        |          |
|--------|----------|
| HIF1A  | CP       |
| STAT1  | CPEB3    |
| SOX2   | CPED1    |
| EGR1   | CPLX1    |
| FOS    | CPLX1    |
| PRDM14 | CPLX1    |
| RUNX1  | CPN2     |
| SOX2   | CPN2     |
| TFAP2C | CPNE4    |
| RBL2   | CPSF3L   |
| ETS1   | CPSF3L   |
| TFAP2C | CPT1A    |
| RB1    | CPT2     |
| RBL2   | CPTP     |
| ESR1   | CPXM2    |
| RUNX1  | CPXM2    |
| SOX2   | CPXM2    |
| TP53   | CR1L     |
| RXRA   | CRABP2   |
| TFAP2C | CRAMP1L  |
| FOXA1  | CREB3L1  |
| ZNF263 | CREB3L3  |
| RUNX1  | CREBBP   |
| STAT1  | CREBRF   |
| TP53   | CREG1    |
| CREB1  | CRH      |
| ESR1   | CRH      |
| NR3C1  | CRH      |
| STAT1  | CRIM1    |
| EGR1   | CRISPLD2 |
| HIF1A  | CRISPLD2 |



|                |          |
|----------------|----------|
| hsa-miR-224-5p | NCOA6    |
| hsa-miR-23a-3p | C2orf69  |
| hsa-miR-23a-3p | IL6R     |
| hsa-miR-23a-3p | PPARGC1A |
| hsa-miR-23a-3p | TNRC6A   |
| hsa-miR-23b-3p | AKAP11   |
| hsa-miR-23b-3p | ARFIP1   |
| hsa-miR-23b-3p | CHUK     |
| hsa-miR-23b-3p | DDX47    |
| hsa-miR-23b-3p | LBR      |
| hsa-miR-23b-3p | MCFD2    |
| hsa-miR-23b-3p | MED4     |
| hsa-miR-23b-3p | PCMTD2   |
| hsa-miR-23b-3p | PLAU     |
| hsa-miR-23b-3p | SOCS6    |
| hsa-miR-23b-3p | STAT5B   |
| hsa-miR-23b-3p | TAB3     |
| hsa-miR-23b-3p | ZMYM2    |
| hsa-miR-24-3p  | ACVR1B   |
| hsa-miR-24-3p  | BCL2L11  |
| hsa-miR-24-3p  | CCDC58   |
| hsa-miR-24-3p  | CMTM4    |
| hsa-miR-24-3p  | DNAJB12  |
| hsa-miR-24-3p  | KLHDC3   |
| hsa-miR-24-3p  | LIMD1    |
| hsa-miR-24-3p  | MAGI1    |
| hsa-miR-24-3p  | MARCKSL1 |
| hsa-miR-24-3p  | MATR3    |
| hsa-miR-24-3p  | MBD6     |
| hsa-miR-24-3p  | MLEC     |
| hsa-miR-24-3p  | PER2     |

|        |          |
|--------|----------|
| SOX2   | CRISPLD2 |
| EPAS1  | CRKL     |
| STAT6  | CRNDE    |
| E2F4   | CROCC    |
| ETS1   | CROCC    |
| GATA3  | CROCC    |
| MITF   | CROCC    |
| RB1    | CROCC    |
| RBL2   | CROCC    |
| TP53   | CROCC    |
| TRIM28 | CROCC    |
| CTCF   | CROCCP2  |
| ESR1   | CROCCP2  |
| MITF   | CROCCP2  |
| RB1    | CROCCP2  |
| RBL2   | CROCCP2  |
| STAT6  | CROCCP2  |
| TFAP2C | CROCCP2  |
| ETS1   | CROCCP3  |
| GATA3  | CROCCP3  |
| MITF   | CROCCP3  |
| TP53   | CROCCP3  |
| STAT1  | CRTC3    |
| ZNF263 | CRTC3    |
| RXRA   | CRYAB    |
| SRF    | CRYAB    |
| HIF1A  | CRYBA2   |
| SOX2   | CRYBB2P1 |
| FOXA1  | CRYBG3   |
| PRDM14 | CSAD     |
| SOX2   | CSDC2    |





|                |          |
|----------------|----------|
| hsa-miR-24-3p  | PIM2     |
| hsa-miR-24-3p  | PTPRF    |
| hsa-miR-24-3p  | RNF2     |
| hsa-miR-24-3p  | SCML2    |
| hsa-miR-24-3p  | SESN1    |
| hsa-miR-24-3p  | STRADB   |
| hsa-miR-24-3p  | TMEM194A |
| hsa-miR-24-3p  | TMEM209  |
| hsa-miR-24-3p  | TOP1     |
| hsa-miR-24-3p  | VGLL3    |
| hsa-miR-24-3p  | ZNF217   |
| hsa-miR-25-3p  | ANKIB1   |
| hsa-miR-25-3p  | BCL2L11  |
| hsa-miR-25-3p  | CHCHD10  |
| hsa-miR-25-3p  | FNDC3B   |
| hsa-miR-25-3p  | KAT2B    |
| hsa-miR-25-3p  | KLF4     |
| hsa-miR-25-3p  | PCDH7    |
| hsa-miR-25-3p  | PKDCC    |
| hsa-miR-25-3p  | SRPR     |
| hsa-miR-26a-5p | ADM      |
| hsa-miR-26a-5p | BBX      |
| hsa-miR-26a-5p | E2F7     |
| hsa-miR-26a-5p | EZH2     |
| hsa-miR-26a-5p | GSK3B    |
| hsa-miR-26a-5p | MTDH     |
| hsa-miR-26a-5p | PTEN     |
| hsa-miR-26a-5p | SMAD1    |
| hsa-miR-26a-5p | STRADB   |
| hsa-miR-26b-5p | ADM      |
| hsa-miR-26b-5p | CCDC28A  |

|        |          |
|--------|----------|
| STAT6  | CSDE1    |
| ESR1   | CSF1     |
| STAT1  | CSF1     |
| SPI1   | CSF1R    |
| Spi1   | CSF1R    |
| JUN    | CSF2     |
| SPI1   | CSF2RA   |
| SPI1   | CSF2RB   |
| SPI1   | CSF3R    |
| STAT6  | CSK      |
| PRDM14 | CSMD1    |
| E2F4   | CSMD2    |
| TRIM28 | CSMD2    |
| STAT1  | CSNK1A1  |
| ZNF263 | CSNK1D   |
| EPAS1  | CSRNP1   |
| STAT1  | CSRP1    |
| ZNF263 | CST6     |
| STAT6  | CTAGE7P  |
| TP53   | CTBS     |
| HIF1A  | CTF2P    |
| DLL1   | CTGF     |
| Ets1   | CTGF     |
| FLI1   | CTGF     |
| Fli1   | CTGF     |
| SMAD3  | CTGF     |
| SOX2   | CTH      |
| NFIA   | CTLA4    |
| CTCF   | CTNNBIP1 |
| ESR2   | CTNNBIP1 |
| ETS1   | CTNNBIP1 |



|                |         |
|----------------|---------|
| hsa-miR-26b-5p | CREBZF  |
| hsa-miR-26b-5p | FAM136A |
| hsa-miR-26b-5p | FAM98A  |
| hsa-miR-26b-5p | FBXO11  |
| hsa-miR-26b-5p | G3BP2   |
| hsa-miR-26b-5p | GNA13   |
| hsa-miR-26b-5p | HOXA9   |
| hsa-miR-26b-5p | PFKFB3  |
| hsa-miR-26b-5p | PITPNC1 |
| hsa-miR-26b-5p | PLOD2   |
| hsa-miR-26b-5p | POLR3G  |
| hsa-miR-26b-5p | PPP3R1  |
| hsa-miR-26b-5p | PTGS2   |
| hsa-miR-26b-5p | RCBTB1  |
| hsa-miR-26b-5p | RCN2    |
| hsa-miR-26b-5p | RFX7    |
| hsa-miR-26b-5p | RNF6    |
| hsa-miR-26b-5p | RTF1    |
| hsa-miR-26b-5p | SACS    |
| hsa-miR-26b-5p | SLC19A2 |
| hsa-miR-26b-5p | SLC7A11 |
| hsa-miR-26b-5p | SSH2    |
| hsa-miR-26b-5p | TMC7    |
| hsa-miR-26b-5p | USP3    |
| hsa-miR-26b-5p | VANGL2  |
| hsa-miR-26b-5p | ZNF652  |
| hsa-miR-27a-3p | ABCA1   |
| hsa-miR-27a-3p | AFF4    |
| hsa-miR-27a-3p | DNAJC27 |
| hsa-miR-27a-3p | EGFR    |
| hsa-miR-27a-3p | FBXW7   |

|         |          |
|---------|----------|
| HNF4A   | CTNNBIP1 |
| RB1     | CTNNBIP1 |
| RBL2    | CTNNBIP1 |
| SMARCA4 | CTNNBIP1 |
| TAL1    | CTNNBIP1 |
| RB1     | CTPS1    |
| RBL2    | CTPS1    |
| TP53    | CTPS1    |
| MYB     | CTSG     |
| SPI1    | CTSG     |
| SPI1    | CTSS     |
| STAT6   | CTTN     |
| STAT6   | CUL5     |
| FOXA1   | CUX1     |
| STAT1   | CUX1     |
| PRDM14  | CWH43    |
| ZNF263  | CWH43    |
| NFAT1   | CX3CR1   |
| NFATC1  | CX3CR1   |
| STAT1   | CXCL10   |
| ESR1    | CXCL12   |
| SOX2    | CXCL8    |
| Spi1    | CXCR1    |
| EPAS1   | CXCR4    |
| EPAS1   | CXXC5    |
| TFAP2C  | CXXC5    |
| STAT6   | CYB561D1 |
| STAT6   | CYB5D1   |
| SPI1    | CYBB     |
| HIF1A   | CYCS     |
| STAT6   | CYP11A1  |



|                |          |
|----------------|----------|
| hsa-miR-27a-3p | FOXO1    |
| hsa-miR-27a-3p | GPAM     |
| hsa-miR-27a-3p | MIER3    |
| hsa-miR-27a-3p | MKNK2    |
| hsa-miR-27a-3p | NFE2L2   |
| hsa-miR-27a-3p | PDS5B    |
| hsa-miR-27a-3p | RMND5A   |
| hsa-miR-27a-3p | RNF182   |
| hsa-miR-27a-3p | RPS6KA5  |
| hsa-miR-27a-3p | SPRY2    |
| hsa-miR-27a-3p | THRB     |
| hsa-miR-27a-3p | TMEM170B |
| hsa-miR-27a-3p | USP25    |
| hsa-miR-27a-3p | ZNF800   |
| hsa-miR-27b-3p | ADORA2B  |
| hsa-miR-27b-3p | EYA4     |
| hsa-miR-27b-3p | HNRNPF   |
| hsa-miR-27b-3p | LCOR     |
| hsa-miR-27b-3p | NPEPPS   |
| hsa-miR-27b-3p | PPARG    |
| hsa-miR-28-5p  | N4BP1    |
| hsa-miR-29a-3p | COL4A1   |
| hsa-miR-29a-3p | COL4A2   |
| hsa-miR-29a-3p | CPEB3    |
| hsa-miR-29a-3p | DICER1   |
| hsa-miR-29a-3p | DNMT3A   |
| hsa-miR-29a-3p | DNMT3B   |
| hsa-miR-29a-3p | HBP1     |
| hsa-miR-29a-3p | MYCN     |
| hsa-miR-29a-3p | NASP     |
| hsa-miR-29a-3p | PPP1R13B |

|        |            |
|--------|------------|
| NR4A2  | CYP11B2    |
| DAND5  | CYP17A1    |
| GATA4  | CYP17A1    |
| GATA6  | CYP17A1    |
| NFIC   | CYP17A1    |
| SF1    | CYP17A1    |
| SP3    | CYP17A1    |
| TBP    | CYP17A1    |
| KLF16  | CYP1A1     |
| NFIA   | CYP1A2     |
| EPAS1  | CYP1B1-AS1 |
| STAT1  | CYP1B1-AS1 |
| FOXA1  | CYP24A1    |
| SRF    | CYP24A1    |
| TFAP2C | CYP24A1    |
| RXRA   | CYP26A1    |
| FOXA1  | CYP27C1    |
| HNF4A  | CYP2C9     |
| HNF4A  | CYP3A4     |
| ESR1   | CYP4B1     |
| TRIM28 | CYP4B1     |
| CEBPA  | CYP7A1     |
| FOXM1  | CYP7A1     |
| HNF1A  | CYP7A1     |
| HNF4A  | CYP7A1     |
| HNF4A  | CYP8B1     |
| STAT6  | CYR61      |
| BACH1  | CYYR1      |
| EPAS1  | DAAM1      |
| STAT6  | DAAM1      |
| RB1    | DAB1       |



|                |          |
|----------------|----------|
| hsa-miR-29a-3p | PTEN     |
| hsa-miR-29a-3p | PXDN     |
| hsa-miR-29a-3p | SUV420H2 |
| hsa-miR-29a-3p | TET1     |
| hsa-miR-29b-3p | CLDN1    |
| hsa-miR-29b-3p | COL3A1   |
| hsa-miR-29b-3p | COL4A1   |
| hsa-miR-29b-3p | DNMT3A   |
| hsa-miR-29b-3p | HDAC4    |
| hsa-miR-29b-3p | MYCN     |
| hsa-miR-29b-3p | NASP     |
| hsa-miR-29b-3p | PPP1R13B |
| hsa-miR-29b-3p | PTEN     |
| hsa-miR-29b-3p | TET1     |
| hsa-miR-29b-3p | VEGFA    |
| hsa-miR-29c-3p | AKT3     |
| hsa-miR-29c-3p | ANKRD13C |
| hsa-miR-29c-3p | BACH2    |
| hsa-miR-29c-3p | CEP68    |
| hsa-miR-29c-3p | COL15A1  |
| hsa-miR-29c-3p | COL3A1   |
| hsa-miR-29c-3p | COL4A1   |
| hsa-miR-29c-3p | COL4A2   |
| hsa-miR-29c-3p | COL7A1   |
| hsa-miR-29c-3p | DICER1   |
| hsa-miR-29c-3p | DNMT3A   |
| hsa-miR-29c-3p | DNMT3B   |
| hsa-miR-29c-3p | FBN1     |
| hsa-miR-29c-3p | HMGCR    |
| hsa-miR-29c-3p | KLHL28   |
| hsa-miR-29c-3p | LAMC1    |

|                  |         |
|------------------|---------|
| TAL1             | DAB1    |
| TP53             | DAB1    |
| RUNX1            | DAD1    |
| STAT6            | DAD1    |
| TFAP2C           | DAGLA   |
| BACH1            | DAPK1   |
| FOXA1            | DAPK1   |
| EPAS1            | DAPK2   |
| EPAS1            | DARS    |
| HIF1A            | DARS    |
| EPAS1            | DAZL    |
| HIF1A            | DAZL    |
| GATA3            | DBH     |
| LOC100363500; Cr | DBH     |
| PHOX2A           | DBH     |
| PHOX2B           | DBH     |
| REPIN1           | DBH     |
| SP1              | DBH     |
| TFAP2A           | DBH     |
| YY1              | DBH     |
| ZNF263           | DBP     |
| PRDM14           | DBX1    |
| FOS              | DCAF15  |
| FOS              | DCAF7   |
| FOS              | DCAKD   |
| TP53             | DCC     |
| SOX2             | DCHS2   |
| ESR1             | DCLRE1B |
| STAT6            | DCLRE1B |
| FOS              | DCUN1D4 |
| RB1              | DDAH1   |

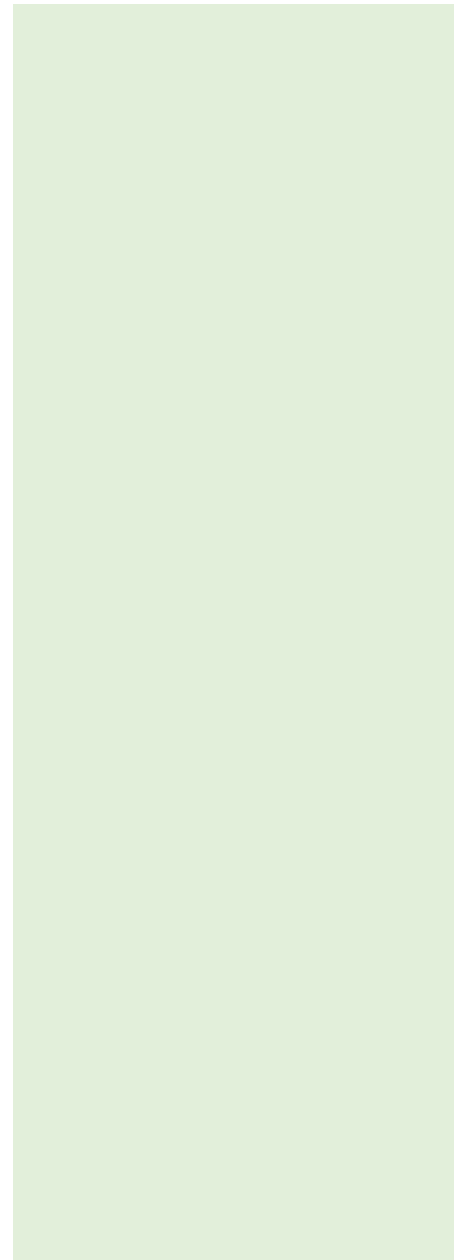

|                 |          |
|-----------------|----------|
| hsa-miR-29c-3p  | MYCN     |
| hsa-miR-29c-3p  | PPP1R13B |
| hsa-miR-29c-3p  | PURG     |
| hsa-miR-29c-3p  | R3HDM4   |
| hsa-miR-29c-3p  | RAB30    |
| hsa-miR-29c-3p  | RNF19A   |
| hsa-miR-29c-3p  | SPIN4    |
| hsa-miR-29c-3p  | SUV420H2 |
| hsa-miR-29c-3p  | TDG      |
| hsa-miR-29c-3p  | TMTC3    |
| hsa-miR-29c-3p  | VEGFA    |
| hsa-miR-29c-3p  | ZBTB10   |
| hsa-miR-301a-3p | LONRF1   |
| hsa-miR-301a-3p | RUNX3    |
| hsa-miR-301a-3p | WHSC1L1  |
| hsa-miR-302a-3p | LEFTY1   |
| hsa-miR-302a-3p | LEFTY2   |
| hsa-miR-302b-3p | TGFBR2   |
| hsa-miR-302d-3p | LEFTY1   |
| hsa-miR-302d-3p | LEFTY2   |
| hsa-miR-302d-3p | TRPS1    |
| hsa-miR-30a-5p  | ABL1     |
| hsa-miR-30a-5p  | BECN1    |
| hsa-miR-30a-5p  | CARS     |
| hsa-miR-30a-5p  | CHD1     |
| hsa-miR-30a-5p  | CPNE8    |
| hsa-miR-30a-5p  | CSNK1G1  |
| hsa-miR-30a-5p  | DPY19L1  |
| hsa-miR-30a-5p  | DSG2     |
| hsa-miR-30a-5p  | ELMOD2   |
| hsa-miR-30a-5p  | FAHD1    |

|         |         |
|---------|---------|
| TP53    | DDAH1   |
| STAT6   | DDB2    |
| Fev     | DDC     |
| HNF1A   | DDC     |
| STAT6   | DDHD1   |
| RB1     | DDI2    |
| RBL2    | DDI2    |
| E2F4    | DDI2    |
| ETS1    | DDI2    |
| SMARCA4 | DDI2    |
| EPAS1   | DDIT4   |
| ZNF263  | DDIT4   |
| EPAS1   | DDIT4L  |
| E2F4    | DDOST   |
| ETS1    | DDOST   |
| RB1     | DDOST   |
| RBL2    | DDOST   |
| EPAS1   | DDR1    |
| TRIM28  | DDR2    |
| ZNF263  | DDRKG1  |
| HIF1A   | DDX18   |
| STAT6   | DDX19A  |
| EGR1    | DDX20   |
| STAT1   | DDX23   |
| STAT6   | DDX23   |
| HIF1A   | DDX41   |
| STAT6   | DDX54   |
| HIF1A   | DENND1A |
| RUNX1   | DENND1A |
| STAT1   | DENND1A |
| ESR1    | DENND2C |



|                |          |
|----------------|----------|
| hsa-miR-30a-5p | GALNT1   |
| hsa-miR-30a-5p | GALNT7   |
| hsa-miR-30a-5p | ITGA6    |
| hsa-miR-30a-5p | KIF11    |
| hsa-miR-30a-5p | LCLAT1   |
| hsa-miR-30a-5p | LIMCH1   |
| hsa-miR-30a-5p | MAN1A2   |
| hsa-miR-30a-5p | MTDH     |
| hsa-miR-30a-5p | NDEL1    |
| hsa-miR-30a-5p | NT5E     |
| hsa-miR-30a-5p | P4HA2    |
| hsa-miR-30a-5p | PAFAH1B2 |
| hsa-miR-30a-5p | PICALM   |
| hsa-miR-30a-5p | PIK3CD   |
| hsa-miR-30a-5p | PPID     |
| hsa-miR-30a-5p | PPP1R12A |
| hsa-miR-30a-5p | PPP3R1   |
| hsa-miR-30a-5p | PRDM1    |
| hsa-miR-30a-5p | PTGFRN   |
| hsa-miR-30a-5p | PTP4A1   |
| hsa-miR-30a-5p | RAD23B   |
| hsa-miR-30a-5p | RPRD1A   |
| hsa-miR-30a-5p | RUNX2    |
| hsa-miR-30a-5p | SEC23A   |
| hsa-miR-30a-5p | SEC24A   |
| hsa-miR-30a-5p | SLC38A2  |
| hsa-miR-30a-5p | SLC4A7   |
| hsa-miR-30a-5p | SON      |
| hsa-miR-30a-5p | STX16    |
| hsa-miR-30a-5p | TMEM87A  |
| hsa-miR-30a-5p | TNRC6A   |

|         |         |
|---------|---------|
| TP53    | DENND2C |
| STAT1   | DENND4A |
| SRF     | DES     |
| RUNX1   | DES11   |
| RBL2    | DFFA    |
| RBL2    | DFFB    |
| TAL1    | DFFB    |
| HIF1A   | DGAT2   |
| RUNX1   | DGCR6   |
| FOS     | DGCR8   |
| FOS     | DGKG    |
| E2F4    | DHDDS   |
| RB1     | DHDDS   |
| SP1     | DHFRP1  |
| STAT6   | DHRS12  |
| CTCF    | DHRS3   |
| ESR1    | DHRS3   |
| ESR2    | DHRS3   |
| ETS1    | DHRS3   |
| GATA2   | DHRS3   |
| GATA3   | DHRS3   |
| MITF    | DHRS3   |
| RB1     | DHRS3   |
| RBL2    | DHRS3   |
| SMARCA4 | DHRS3   |
| TP53    | DHRS3   |
| EPAS1   | DHX32   |
| HIF1A   | DHX57   |
| RUNX1   | DIAPH1  |
| TFAP2C  | DICER1  |
| SRF     | DIO2    |



|                |         |
|----------------|---------|
| hsa-miR-30a-5p | TWF1    |
| hsa-miR-30a-5p | XPO1    |
| hsa-miR-30a-5p | YWHAZ   |
| hsa-miR-30b-5p | ATG12   |
| hsa-miR-30b-5p | B3GNT5  |
| hsa-miR-30b-5p | BDP1    |
| hsa-miR-30b-5p | CCNE2   |
| hsa-miR-30b-5p | CHD1    |
| hsa-miR-30b-5p | DDAH1   |
| hsa-miR-30b-5p | EML4    |
| hsa-miR-30b-5p | FRZB    |
| hsa-miR-30b-5p | GFPT2   |
| hsa-miR-30b-5p | GLCE    |
| hsa-miR-30b-5p | HIC2    |
| hsa-miR-30b-5p | KLF10   |
| hsa-miR-30b-5p | KLHL28  |
| hsa-miR-30b-5p | MIER3   |
| hsa-miR-30b-5p | OTUD4   |
| hsa-miR-30b-5p | PIP4K2A |
| hsa-miR-30b-5p | RFX7    |
| hsa-miR-30b-5p | RUNX2   |
| hsa-miR-30b-5p | SH2B3   |
| hsa-miR-30b-5p | TAOK1   |
| hsa-miR-30b-5p | ZDHHC17 |
| hsa-miR-30c-5p | B3GNT5  |
| hsa-miR-30c-5p | CAPZA1  |
| hsa-miR-30c-5p | CCDC117 |
| hsa-miR-30c-5p | CELSR3  |
| hsa-miR-30c-5p | CHD1    |
| hsa-miR-30c-5p | DPYSL2  |
| hsa-miR-30c-5p | EED     |

|        |         |
|--------|---------|
| PRDM14 | DIP2C   |
| RUNX1  | DIP2C   |
| TRIM28 | DIRAS3  |
| EPAS1  | DIRC3   |
| TP53   | DISC1   |
| TRIM28 | DISC1   |
| TP53   | DISP1   |
| STAT6  | DLEU1   |
| EGR1   | DLG2    |
| IGF1R  | DLG2    |
| ZNF263 | DLG2    |
| RB1    | DLGAP3  |
| STAT6  | DLST    |
| RB1    | DMAP1   |
| EGR1   | DMBX1   |
| SRF    | DMD     |
| PRDM14 | DMRT1   |
| TRIM28 | DMRTB1  |
| HIF1A  | DMXL1   |
| TRIM28 | DNAH14  |
| STAT1  | DNAH2   |
| EGR1   | DNAH9   |
| HIF1A  | DNAJB2  |
| FOS    | DNAJB5  |
| ZNF263 | DNAJB6  |
| EPAS1  | DNAJB6  |
| HIF1A  | DNAJB9  |
| CEBPA  | DNAJC11 |
| CTCF   | DNAJC11 |
| E2F4   | DNAJC11 |
| ETS1   | DNAJC11 |



|                |          |
|----------------|----------|
| hsa-miR-30c-5p | MTDH     |
| hsa-miR-30c-5p | NEDD4    |
| hsa-miR-30c-5p | PNKD     |
| hsa-miR-30c-5p | PPP1R12A |
| hsa-miR-30c-5p | RASA1    |
| hsa-miR-30c-5p | SOCS3    |
| hsa-miR-30c-5p | TNRC6A   |
| hsa-miR-30c-5p | TWF1     |
| hsa-miR-30c-5p | UBE2I    |
| hsa-miR-30c-5p | USP37    |
| hsa-miR-30d-5p | RUNX2    |
| hsa-miR-30e-5p | LIMCH1   |
| hsa-miR-30e-5p | UBE2I    |
| hsa-miR-31-5p  | LATS2    |
| hsa-miR-31-5p  | NUMB     |
| hsa-miR-31-5p  | PPP2R2A  |
| hsa-miR-31-5p  | PRKCE    |
| hsa-miR-31-5p  | RASA1    |
| hsa-miR-320a   | MCL1     |
| hsa-miR-320a   | ARPP19   |
| hsa-miR-320a   | CANX     |
| hsa-miR-320a   | MAPK8IP3 |
| hsa-miR-320a   | NCAPD3   |
| hsa-miR-320a   | PLS1     |
| hsa-miR-320a   | PNN      |
| hsa-miR-320a   | TSC1     |
| hsa-miR-320b   | ARF1     |
| hsa-miR-320b   | N4BP1    |
| hsa-miR-320c   | PCDHA2   |
| hsa-miR-324-5p | CDS1     |
| hsa-miR-324-5p | PSME3    |

|         |         |
|---------|---------|
| GATA2   | DNAJC11 |
| HNF4A   | DNAJC11 |
| RB1     | DNAJC11 |
| RBL2    | DNAJC11 |
| SMARCA4 | DNAJC11 |
| MITF    | DNAJC16 |
| RB1     | DNAJC16 |
| RB1     | DNAJC6  |
| TAL1    | DNAJC6  |
| RB1     | DNAJC8  |
| RBL2    | DNAJC8  |
| RBL2    | DNALI1  |
| HIF1A   | DNM1L   |
| EPAS1   | DNM2    |
| FOS     | DNM2    |
| TP53    | DNM3    |
| STAT1   | DNMT3B  |
| FOXA1   | DNPEP   |
| STAT6   | DOC2GP  |
| ESR1    | DOCK1   |
| RUNX1   | DOCK1   |
| RUNX1   | DOCK5   |
| RUNX1   | DOCK6   |
| TAL1    | DOCK7   |
| FOXA1   | DOCK8   |
| FOXA1   | DOK5    |
| TFAP2C  | DOK5    |
| FOS     | DOLPP1  |
| EPAS1   | DPCD    |
| EGR1    | DPF1    |
| RUNX1   | DPF3    |





|               |         |
|---------------|---------|
| hsa-miR-32-5p | APPL1   |
| hsa-miR-32-5p | BCL11A  |
| hsa-miR-32-5p | BCL11B  |
| hsa-miR-32-5p | BCL2L11 |
| hsa-miR-32-5p | CNEP1R1 |
| hsa-miR-32-5p | DNAJB9  |
| hsa-miR-32-5p | DOCK9   |
| hsa-miR-32-5p | EDEM1   |
| hsa-miR-32-5p | ERGIC2  |
| hsa-miR-32-5p | FOXN2   |
| hsa-miR-32-5p | GFPT2   |
| hsa-miR-32-5p | GOLGA3  |
| hsa-miR-32-5p | GOLGA8A |
| hsa-miR-32-5p | GPBP1L1 |
| hsa-miR-32-5p | HIVEP1  |
| hsa-miR-32-5p | ITGA6   |
| hsa-miR-32-5p | ITGAV   |
| hsa-miR-32-5p | ITPR1   |
| hsa-miR-32-5p | KAT2B   |
| hsa-miR-32-5p | LHFPL2  |
| hsa-miR-32-5p | MED19   |
| hsa-miR-32-5p | MFF     |
| hsa-miR-32-5p | MORC3   |
| hsa-miR-32-5p | MTF1    |
| hsa-miR-32-5p | MYO5A   |
| hsa-miR-32-5p | NEFL    |
| hsa-miR-32-5p | PAPD7   |
| hsa-miR-32-5p | PHLPP2  |
| hsa-miR-32-5p | PLEKHA1 |
| hsa-miR-32-5p | PPCS    |
| hsa-miR-32-5p | RGS17   |

|         |        |
|---------|--------|
| RB1     | DPH2   |
| BACH1   | DPH6   |
| HIF1A   | DPP6   |
| EPAS1   | DPT    |
| PRDM14  | DPYSL2 |
| HIF1A   | DPYSL2 |
| STAT6   | DRAP1  |
| CEBPA   | DRAXIN |
| CTCF    | DRAXIN |
| SMARCA4 | DRAXIN |
| TAL1    | DRAXIN |
| KLF16   | DRD1   |
| MEIS2   | DRD1   |
| Pou3f4  | DRD1   |
| Sp1     | DRD1   |
| Sp3     | DRD1   |
| TFAP2A  | DRD1   |
| Tfap2b  | DRD1   |
| TGIF1   | DRD1   |
| ZIC2    | DRD1   |
| EPAS1   | DSCAM  |
| HIF1A   | DSCAM  |
| SOX2    | DSEL   |
| STAT1   | DSG3   |
| EPAS1   | DSP    |
| TP53    | DSTYK  |
| TRIM28  | DSTYK  |
| HIF1A   | DTWD2  |
| STAT6   | DTX1   |
| STAT1   | DTX3L  |
| FOXA1   | DUSP4  |



|                |          |
|----------------|----------|
| hsa-miR-32-5p  | RHPN2    |
| hsa-miR-32-5p  | SLC25A32 |
| hsa-miR-32-5p  | SLX4     |
| hsa-miR-32-5p  | SPRYD4   |
| hsa-miR-32-5p  | SSFA2    |
| hsa-miR-32-5p  | SUV420H1 |
| hsa-miR-32-5p  | SYNJ1    |
| hsa-miR-32-5p  | TMF1     |
| hsa-miR-32-5p  | TRIO     |
| hsa-miR-32-5p  | TULP4    |
| hsa-miR-32-5p  | UBE2Z    |
| hsa-miR-32-5p  | UGP2     |
| hsa-miR-32-5p  | ZFC3H1   |
| hsa-miR-326    | SMO      |
| hsa-miR-328-3p | H2AFX    |
| hsa-miR-330-3p | E2F1     |
| hsa-miR-335-5p | DAAM1    |
| hsa-miR-335-5p | G2E3     |
| hsa-miR-335-5p | KLHL28   |
| hsa-miR-335-5p | RASA1    |
| hsa-miR-338-3p | UBE2Q1   |
| hsa-miR-33a-5p | ABCA1    |
| hsa-miR-33a-5p | ANKRD29  |
| hsa-miR-33a-5p | CROT     |
| hsa-miR-33a-5p | PIM1     |
| hsa-miR-33a-5p | YWHAH    |
| hsa-miR-33a-5p | ZC3H12C  |
| hsa-miR-33b-5p | ABCA1    |
| hsa-miR-340-5p | DDX5     |
| hsa-miR-340-5p | FBXL3    |
| hsa-miR-340-5p | KAT6B    |

|        |          |
|--------|----------|
| PRDM14 | DUSP6    |
| CTCF   | DVL1     |
| E2F4   | DVL1     |
| ESR2   | DVL1     |
| HNF4A  | DVL1     |
| EPAS1  | DYNLL1   |
| EPAS1  | DYNLRB1  |
| TP53   | DYRK3    |
| E2F1   | E2F1     |
| E2F4   | E2F2     |
| ESR1   | E2F2     |
| GATA2  | E2F2     |
| GATA3  | E2F2     |
| RB1    | E2F2     |
| RBL2   | E2F2     |
| STAT6  | E2F2     |
| FOXA1  | EARS2    |
| STAT6  | EARS2    |
| EPAS1  | EBF1     |
| FOXA1  | EBF1     |
| SOX2   | EBF3     |
| RBL2   | EBNA1BP2 |
| E2F4   | ECE1     |
| EPAS1  | ECE1     |
| ESR1   | ECE1     |
| ESR2   | ECE1     |
| ETS1   | ECE1     |
| GATA2  | ECE1     |
| GATA3  | ECE1     |
| RB1    | ECE1     |
| RBL2   | ECE1     |



|                |         |
|----------------|---------|
| hsa-miR-340-5p | LEPROT  |
| hsa-miR-340-5p | NEK7    |
| hsa-miR-340-5p | REV3L   |
| hsa-miR-340-5p | SIVA1   |
| hsa-miR-342-3p | RRM2    |
| hsa-miR-34a-5p | ACSL4   |
| hsa-miR-34a-5p | ARHGAP1 |
| hsa-miR-34a-5p | BCL2L13 |
| hsa-miR-34a-5p | CAMTA1  |
| hsa-miR-34a-5p | CCL22   |
| hsa-miR-34a-5p | CCNE2   |
| hsa-miR-34a-5p | DLL1    |
| hsa-miR-34a-5p | E2F5    |
| hsa-miR-34a-5p | FOXP1   |
| hsa-miR-34a-5p | LDHA    |
| hsa-miR-34a-5p | LEF1    |
| hsa-miR-34a-5p | MDM4    |
| hsa-miR-34a-5p | MET     |
| hsa-miR-34a-5p | NOTCH1  |
| hsa-miR-34a-5p | PDGFRA  |
| hsa-miR-34a-5p | PEA15   |
| hsa-miR-34a-5p | POGZ    |
| hsa-miR-34a-5p | PPP1R10 |
| hsa-miR-34a-5p | RRAS    |
| hsa-miR-34a-5p | SATB2   |
| hsa-miR-34a-5p | SGPP1   |
| hsa-miR-34a-5p | SLC4A7  |
| hsa-miR-34a-5p | SYT1    |
| hsa-miR-34a-5p | TNRC18  |
| hsa-miR-34a-5p | TPPP    |
| hsa-miR-34a-5p | UBP1    |

|         |           |
|---------|-----------|
| HIF1A   | ECE2      |
| ESR1    | ECHDC2    |
| STAT1   | EDEM2     |
| STAT6   | EDEM3     |
| EPAS1   | EDN1      |
| TP53    | EDN2      |
| SOX10   | EDNRB     |
| PRDM14  | EEF1A1P11 |
| SOX2    | EEF1A1P6  |
| HIF1A   | EFCAB1    |
| HIF1A   | EFCAB3    |
| RB1     | EFCAB7    |
| STAT1   | EFCAB7    |
| CTCF    | EFHD2     |
| E2F4    | EFHD2     |
| ETS1    | EFHD2     |
| GATA2   | EFHD2     |
| GATA3   | EFHD2     |
| MITF    | EFHD2     |
| RB1     | EFHD2     |
| RBL2    | EFHD2     |
| SMARCA4 | EFHD2     |
| EPAS1   | EFNA3     |
| HIF1A   | EFNB3     |
| EGR1    | EFR3B     |
| EPAS1   | EGFR      |
| HIF1A   | EGFR      |
| SP1     | EGFR      |
| THRA    | EGFR      |
| EPAS1   | EGLN1     |
| EPAS1   | EGLN3     |



|                 |         |
|-----------------|---------|
| hsa-miR-34a-5p  | VAMP2   |
| hsa-miR-34a-5p  | ZNF644  |
| hsa-miR-34c-5p  | CCNE2   |
| hsa-miR-34c-5p  | MET     |
| hsa-miR-34c-5p  | MYC     |
| hsa-miR-34c-5p  | NOTCH1  |
| hsa-miR-361-5p  | CDC123  |
| hsa-miR-361-5p  | CPOX    |
| hsa-miR-361-5p  | RANBP17 |
| hsa-miR-361-5p  | VEGFA   |
| hsa-miR-365a-3p | NUFIP2  |
| hsa-miR-370-3p  | HMGA2   |
| hsa-miR-370-3p  | MAP3K8  |
| hsa-miR-372-3p  | LATS2   |
| hsa-miR-372-3p  | TGFBR2  |
| hsa-miR-372-3p  | TRPS1   |
| hsa-miR-373-3p  | CFL2    |
| hsa-miR-373-3p  | FYCO1   |
| hsa-miR-373-3p  | LATS2   |
| hsa-miR-373-3p  | PDIK1L  |
| hsa-miR-373-3p  | TFAP4   |
| hsa-miR-373-3p  | TNFAIP1 |
| hsa-miR-373-3p  | TXNIP   |
| hsa-miR-374a-5p | GADD45A |
| hsa-miR-374b-5p | ADD3    |
| hsa-miR-374b-5p | PARD6B  |
| hsa-miR-374b-5p | PELI1   |
| hsa-miR-374b-5p | SRSF7   |
| hsa-miR-374b-5p | TACC1   |
| hsa-miR-374b-5p | ZSWIM6  |
| hsa-miR-375     | JAK2    |

|        |         |
|--------|---------|
| STAT1  | EGLN3   |
| SRF    | EGR1    |
| FOS    | EHBP1   |
| STAT6  | EHD1    |
| EPAS1  | EHD2    |
| ZNF263 | EHD2    |
| STAT6  | EHF     |
| STAT1  | EIF2AK2 |
| FOS    | EIF2AK3 |
| EGR1   | EIF2AP4 |
| ESR1   | EIF2B3  |
| STAT1  | EIF2B5  |
| ESR1   | EIF3A   |
| RBL2   | EIF3I   |
| E2F4   | EIF4G3  |
| ESR1   | EIF4G3  |
| ETS1   | EIF4G3  |
| GATA2  | EIF4G3  |
| GATA3  | EIF4G3  |
| RBL2   | EIF4G3  |
| TAL1   | EIF4G3  |
| TP53   | EIF4G3  |
| SPI1   | ELANE   |
| Spi1   | ELANE   |
| TAL1   | ELAVL4  |
| PRDM14 | ELF2    |
| EPAS1  | ELF3    |
| STAT1  | ELF3    |
| TFAP2C | ELF3    |
| TP53   | ELF3    |
| STAT6  | ELK3    |



|                |          |
|----------------|----------|
| hsa-miR-375    | MTPN     |
| hsa-miR-375    | PDK1     |
| hsa-miR-375    | YAP1     |
| hsa-miR-375    | YWHAZ    |
| hsa-miR-377-3p | PPM1A    |
| hsa-miR-377-3p | SOD2     |
| hsa-miR-383-5p | IRF1     |
| hsa-miR-383-5p | VEGFA    |
| hsa-miR-421    | AFF4     |
| hsa-miR-421    | ATG2B    |
| hsa-miR-421    | DNAJC27  |
| hsa-miR-421    | FAM160B1 |
| hsa-miR-421    | NIPBL    |
| hsa-miR-421    | PRCC     |
| hsa-miR-424-5p | ATF6     |
| hsa-miR-424-5p | CCNE1    |
| hsa-miR-424-5p | CHEK1    |
| hsa-miR-424-5p | CUL2     |
| hsa-miR-424-5p | KIF23    |
| hsa-miR-424-5p | PLAG1    |
| hsa-miR-424-5p | PNISR    |
| hsa-miR-424-5p | SCOC     |
| hsa-miR-424-5p | SIAH1    |
| hsa-miR-424-5p | SMURF1   |
| hsa-miR-424-5p | TBPL1    |
| hsa-miR-424-5p | WEE1     |
| hsa-miR-424-5p | YWHAQ    |
| hsa-miR-425-5p | BCOR     |
| hsa-miR-425-5p | BEX4     |
| hsa-miR-425-5p | BHLHB9   |
| hsa-miR-429    | BAP1     |

|         |         |
|---------|---------|
| STAT1   | ELL     |
| SOX2    | ELL2P3  |
| EPAS1   | ELMSAN1 |
| RB1     | ELOVL1  |
| ESR1    | ELOVL1  |
| IGF1R   | EMBP1   |
| TP53    | EMBP1   |
| ZNF263  | EMBP1   |
| RBL2    | EMC1    |
| SOX2    | ENAH    |
| STAT1   | ENG     |
| ZNF263  | ENG     |
| HIF1A   | ENKUR   |
| CEBPA   | ENO1    |
| CTCF    | ENO1    |
| E2F4    | ENO1    |
| EPAS1   | ENO1    |
| ESR1    | ENO1    |
| ESR2    | ENO1    |
| ETS1    | ENO1    |
| GATA2   | ENO1    |
| GATA3   | ENO1    |
| HIF1A   | ENO1    |
| HNF4A   | ENO1    |
| MITF    | ENO1    |
| RB1     | ENO1    |
| RBL2    | ENO1    |
| SMARCA4 | ENO1    |
| TAL1    | ENO1    |
| STAT6   | ENO4    |
| FOS     | ENSA    |



|                 |        |
|-----------------|--------|
| hsa-miR-429     | ZEB1   |
| hsa-miR-429     | ZEB2   |
| hsa-miR-429     | ELMO2  |
| hsa-miR-429     | ERRFI1 |
| hsa-miR-429     | KLHL20 |
| hsa-miR-429     | RERE   |
| hsa-miR-433-3p  | GRB2   |
| hsa-miR-449a    | CCNE2  |
| hsa-miR-449a    | MET    |
| hsa-miR-449a    | NOTCH1 |
| hsa-miR-449a    | WISP2  |
| hsa-miR-449b-5p | CCNE2  |
| hsa-miR-449b-5p | MET    |
| hsa-miR-454-3p  | RAP2C  |
| hsa-miR-454-3p  | ZBTB4  |
| hsa-miR-485-3p  | NTRK3  |
| hsa-miR-485-5p  | TP53   |
| hsa-miR-491-5p  | TAF10  |
| hsa-miR-494-3p  | ARNTL  |
| hsa-miR-505-3p  | LIMS1  |
| hsa-miR-505-3p  | MYH10  |
| hsa-miR-520b    | MAP3K2 |
| hsa-miR-520b    | MICA   |
| hsa-miR-520c-3p | APP    |
| hsa-miR-520h    | ABCG2  |
| hsa-miR-532-5p  | RUNX3  |
| hsa-miR-548d-3p | ERBB2  |
| hsa-miR-559     | ERBB2  |
| hsa-miR-559     | MTA1   |
| hsa-miR-590-3p  | EXOC5  |
| hsa-miR-590-3p  | FAM49B |

|         |         |
|---------|---------|
| STAT6   | ENSA    |
| FOS     | ENTHD2  |
| HIF1A   | ENTPD4  |
| TP53    | EOMES   |
| STAT6   | EP400   |
| GATA2   | EPB41   |
| RB1     | EPB41   |
| TAL1    | EPB41   |
| FOXA1   | EPB41L5 |
| ESR1    | EPHA10  |
| ESR1    | EPHA2   |
| ESR2    | EPHA2   |
| ETS1    | EPHA2   |
| GATA2   | EPHA2   |
| GATA3   | EPHA2   |
| RB1     | EPHA2   |
| RBL2    | EPHA2   |
| SMARCA4 | EPHA2   |
| TP53    | EPHA2   |
| RUNX1   | EPHA3   |
| SOX2    | EPHA6   |
| ESR2    | EPHB2   |
| RB1     | EPHB2   |
| RBL2    | EPHB2   |
| TP53    | EPHB2   |
| TFAP2C  | EPHB4   |
| HIF1A   | EPHB6   |
| RXRA    | EPO     |
| TAL1    | EPS15   |
| RUNX1   | EPS15L1 |
| TFAP2C  | EPS15L1 |

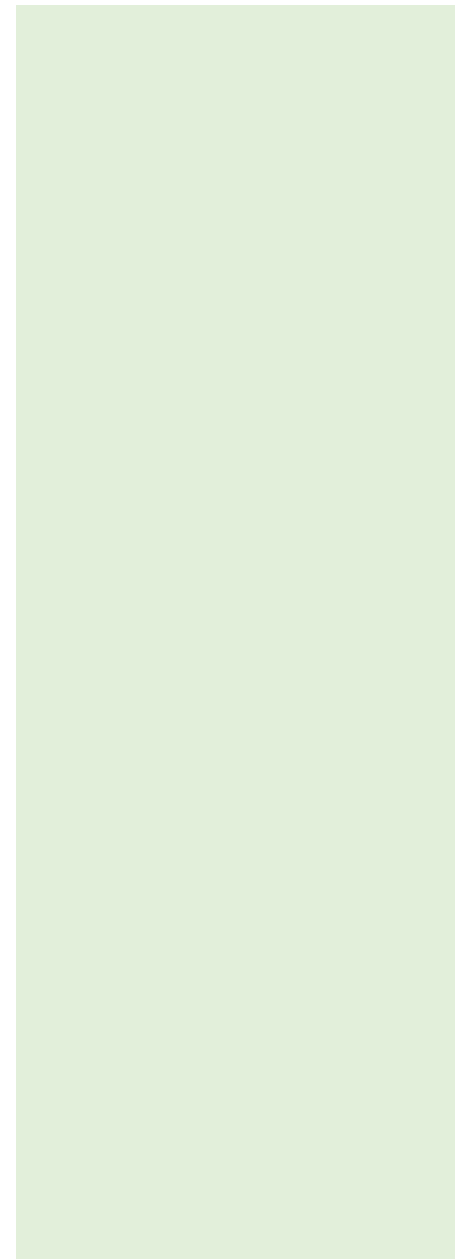

|                |         |
|----------------|---------|
| hsa-miR-590-3p | GATAD2B |
| hsa-miR-590-3p | HIPK1   |
| hsa-miR-590-3p | MIER3   |
| hsa-miR-590-3p | PDIK1L  |
| hsa-miR-590-3p | RBM12B  |
| hsa-miR-590-3p | SESN3   |
| hsa-miR-590-3p | SETD7   |
| hsa-miR-590-3p | TMX3    |
| hsa-miR-590-3p | USP6NL  |
| hsa-miR-615-3p | LCOR    |
| hsa-miR-650    | ING4    |
| hsa-miR-661    | MTA1    |
| hsa-miR-7-5p   | ARF4    |
| hsa-miR-7-5p   | C5orf22 |
| hsa-miR-7-5p   | CALU    |
| hsa-miR-7-5p   | CHAMP1  |
| hsa-miR-7-5p   | CKAP4   |
| hsa-miR-7-5p   | CNN3    |
| hsa-miR-7-5p   | CNOT8   |
| hsa-miR-7-5p   | COLEC12 |
| hsa-miR-7-5p   | ERI2    |
| hsa-miR-7-5p   | FNDC4   |
| hsa-miR-7-5p   | HELLS   |
| hsa-miR-7-5p   | IDE     |
| hsa-miR-7-5p   | IRS2    |
| hsa-miR-7-5p   | LRRC59  |
| hsa-miR-7-5p   | LYPD3   |
| hsa-miR-7-5p   | NXT2    |
| hsa-miR-7-5p   | PLEC    |
| hsa-miR-7-5p   | POLE4   |
| hsa-miR-7-5p   | PPIF    |

|        |            |
|--------|------------|
| TFAP2C | EPS8       |
| SOX2   | EPS8L2     |
| BACH1  | EPS8L3     |
| ESR1   | ERCC6      |
| ZNF263 | EREG       |
| FOS    | ERF        |
| TRIM28 | ERI3       |
| ESR1   | ERICH3     |
| TAL1   | ERICH3     |
| EPAS1  | ERO1L      |
| CEBPA  | ERRFI1     |
| CTCF   | ERRFI1     |
| E2F4   | ERRFI1     |
| ESR1   | ERRFI1     |
| GATA2  | ERRFI1     |
| GATA3  | ERRFI1     |
| HIF1A  | ERRFI1     |
| HNF4A  | ERRFI1     |
| MITF   | ERRFI1     |
| RB1    | ERRFI1     |
| RBL2   | ERRFI1     |
| STAT6  | ERRFI1     |
| TP53   | ERVMER61-1 |
| TRIM28 | ERVMER61-1 |
| CTCF   | ESPN       |
| GATA3  | ESPN       |
| HNF4A  | ESPN       |
| CTCF   | ESPNP      |
| ESR1   | ESPNP      |
| ESR2   | ESPNP      |
| ETS1   | ESPNP      |



|                |           |
|----------------|-----------|
| hsa-miR-7-5p   | PSME3     |
| hsa-miR-7-5p   | RAB11FIP5 |
| hsa-miR-7-5p   | RAF1      |
| hsa-miR-7-5p   | RELA      |
| hsa-miR-7-5p   | RRAS2     |
| hsa-miR-7-5p   | SLC6A9    |
| hsa-miR-7-5p   | SMARCD1   |
| hsa-miR-7-5p   | SNCA      |
| hsa-miR-7-5p   | SPATA2    |
| hsa-miR-7-5p   | UBQLN4    |
| hsa-miR-7-5p   | VPS26A    |
| hsa-miR-765    | NTRK3     |
| hsa-miR-92a-3p | AIDA      |
| hsa-miR-92a-3p | ARID1B    |
| hsa-miR-92a-3p | DMXL1     |
| hsa-miR-92a-3p | ERGIC2    |
| hsa-miR-92a-3p | FAM135A   |
| hsa-miR-92a-3p | FAM20C    |
| hsa-miR-92a-3p | FNDC3B    |
| hsa-miR-92a-3p | FNIP1     |
| hsa-miR-92a-3p | G3BP2     |
| hsa-miR-92a-3p | GOLGA3    |
| hsa-miR-92a-3p | HIPK3     |
| hsa-miR-92a-3p | ITGA5     |
| hsa-miR-92a-3p | KAT2B     |
| hsa-miR-92a-3p | MAP1B     |
| hsa-miR-92a-3p | PCMTD1    |
| hsa-miR-92a-3p | PDS5B     |
| hsa-miR-92a-3p | PKDCC     |
| hsa-miR-92a-3p | SERTAD3   |
| hsa-miR-92a-3p | SRPR      |

|        |         |
|--------|---------|
| GATA3  | ESPNP   |
| MITF   | ESPNP   |
| TP53   | ESPNP   |
| TRIM28 | ESPNP   |
| FOXA1  | ESR1    |
| HIF1A  | ETAA1   |
| NFE2L2 | ETS1    |
| RXRA   | ETS1    |
| STAT6  | ETS1    |
| RUNX1  | ETV5    |
| RUNX1  | ETV6    |
| E2F4   | EVA1B   |
| TAL1   | EVI5    |
| FOS    | EVI5L   |
| EPAS1  | EVL     |
| STAT6  | EXO5    |
| PRDM14 | EXOC6   |
| E2F4   | EXOSC10 |
| ESR1   | EXOSC10 |
| ETS1   | EXOSC10 |
| GATA3  | EXOSC10 |
| MITF   | EXOSC10 |
| RB1    | EXOSC10 |
| RBL2   | EXOSC10 |
| STAT1  | EXT1    |
| FOXA1  | EYA2    |
| GATA2  | EYA3    |
| TAL1   | EYA3    |
| FOXA1  | EYS     |
| HNF4A  | F10     |
| HNF4A  | F2      |





|                |          |
|----------------|----------|
| hsa-miR-92a-3p | SYNJ1    |
| hsa-miR-92a-3p | TECPR2   |
| hsa-miR-92a-3p | TET2     |
| hsa-miR-92a-3p | TMF1     |
| hsa-miR-92a-3p | WASL     |
| hsa-miR-92b-3p | ARID1B   |
| hsa-miR-92b-3p | DDX3X    |
| hsa-miR-92b-3p | DNAJC30  |
| hsa-miR-92b-3p | NLK      |
| hsa-miR-92b-3p | PCMTD1   |
| hsa-miR-93-5p  | ADARB1   |
| hsa-miR-93-5p  | ANKRD29  |
| hsa-miR-93-5p  | ANKRD52  |
| hsa-miR-93-5p  | APBB2    |
| hsa-miR-93-5p  | ARHGAP1  |
| hsa-miR-93-5p  | ARHGAP12 |
| hsa-miR-93-5p  | ARID4B   |
| hsa-miR-93-5p  | ASF1A    |
| hsa-miR-93-5p  | BMPR2    |
| hsa-miR-93-5p  | BNIP2    |
| hsa-miR-93-5p  | BTBD10   |
| hsa-miR-93-5p  | BTG3     |
| hsa-miR-93-5p  | CCNG2    |
| hsa-miR-93-5p  | CNOT4    |
| hsa-miR-93-5p  | CRY2     |
| hsa-miR-93-5p  | DUSP8    |
| hsa-miR-93-5p  | E2F1     |
| hsa-miR-93-5p  | EGLN3    |
| hsa-miR-93-5p  | EPHA4    |
| hsa-miR-93-5p  | EZH1     |
| hsa-miR-93-5p  | F3       |

|         |          |
|---------|----------|
| HNF4A   | F7       |
| HNF4A   | F9       |
| RB1     | FABP3    |
| EPAS1   | FABP5    |
| EGR1    | FABP5P11 |
| SRF     | FABP6    |
| STAT6   | FADD     |
| RB1     | FAF1     |
| TP53    | FAF1     |
| STAT6   | FAHD1    |
| EGR1    | FAIM     |
| STAT1   | FAM102A  |
| TP53    | FAM102B  |
| STAT6   | FAM107B  |
| FOS     | FAM117A  |
| TFAP2C  | FAM120A  |
| FOS     | FAM126A  |
| EPAS1   | FAM129B  |
| HIF1A   | FAM129B  |
| STAT1   | FAM129B  |
| CTCF    | FAM131C  |
| ESR1    | FAM131C  |
| ESR2    | FAM131C  |
| GATA3   | FAM131C  |
| HIF1A   | FAM131C  |
| MITF    | FAM131C  |
| RB1     | FAM131C  |
| RBL2    | FAM131C  |
| SMARCA4 | FAM131C  |
| TP53    | FAM132A  |
| HIF1A   | FAM134C  |



|               |          |
|---------------|----------|
| hsa-miR-93-5p | FAM129A  |
| hsa-miR-93-5p | FBXL5    |
| hsa-miR-93-5p | FCHO2    |
| hsa-miR-93-5p | FEM1C    |
| hsa-miR-93-5p | FYCO1    |
| hsa-miR-93-5p | GPATCH2  |
| hsa-miR-93-5p | GPR137C  |
| hsa-miR-93-5p | HAUS8    |
| hsa-miR-93-5p | HEG1     |
| hsa-miR-93-5p | IRF1     |
| hsa-miR-93-5p | KAT2B    |
| hsa-miR-93-5p | KATNAL1  |
| hsa-miR-93-5p | KIAA1191 |
| hsa-miR-93-5p | KLF11    |
| hsa-miR-93-5p | KLHL28   |
| hsa-miR-93-5p | KPNA2    |
| hsa-miR-93-5p | LDLR     |
| hsa-miR-93-5p | LIMA1    |
| hsa-miR-93-5p | LYST     |
| hsa-miR-93-5p | MAPRE3   |
| hsa-miR-93-5p | MED12L   |
| hsa-miR-93-5p | MFN2     |
| hsa-miR-93-5p | MIDN     |
| hsa-miR-93-5p | NAA30    |
| hsa-miR-93-5p | NIN      |
| hsa-miR-93-5p | OSR1     |
| hsa-miR-93-5p | PAPOLA   |
| hsa-miR-93-5p | PBX3     |
| hsa-miR-93-5p | PDE3B    |
| hsa-miR-93-5p | PDZD11   |
| hsa-miR-93-5p | PGM2L1   |

|        |         |
|--------|---------|
| EPAS1  | FAM13A  |
| HIF1A  | FAM13A  |
| ZNF263 | FAM13A  |
| EGR1   | FAM150B |
| EGR1   | FAM157A |
| PRDM14 | FAM161A |
| EPAS1  | FAM162A |
| HIF1A  | FAM162A |
| PRDM14 | FAM167A |
| HIF1A  | FAM174A |
| EGR1   | FAM178B |
| TP53   | FAM183A |
| SOX2   | FAM19A3 |
| TP53   | FAM19A3 |
| STAT6  | FAM208B |
| SOX2   | FAM20A  |
| TP53   | FAM20B  |
| TRIM28 | FAM20B  |
| ESR1   | FAM213A |
| ETS1   | FAM213B |
| HNF4A  | FAM213B |
| RB1    | FAM213B |
| RBL2   | FAM213B |
| STAT6  | FAM214A |
| HIF1A  | FAM219A |
| STAT6  | FAM21A  |
| ESR1   | FAM24B  |
| ZNF263 | FAM27L  |
| CTCF   | FAM41C  |
| GATA3  | FAM43B  |
| E2F4   | FAM46B  |



|               |           |
|---------------|-----------|
| hsa-miR-93-5p | PKD2      |
| hsa-miR-93-5p | PRRG1     |
| hsa-miR-93-5p | PTPN4     |
| hsa-miR-93-5p | RAB11FIP1 |
| hsa-miR-93-5p | RAB5B     |
| hsa-miR-93-5p | RB1       |
| hsa-miR-93-5p | REEP3     |
| hsa-miR-93-5p | RPS6KA5   |
| hsa-miR-93-5p | SERTAD2   |
| hsa-miR-93-5p | SGMS1     |
| hsa-miR-93-5p | SH3PXD2A  |
| hsa-miR-93-5p | SPOPL     |
| hsa-miR-93-5p | STAT3     |
| hsa-miR-93-5p | STK11     |
| hsa-miR-93-5p | TBC1D20   |
| hsa-miR-93-5p | TGFBR2    |
| hsa-miR-93-5p | TMEM127   |
| hsa-miR-93-5p | TMEM168   |
| hsa-miR-93-5p | TNFRSF21  |
| hsa-miR-93-5p | TNKS1BP1  |
| hsa-miR-93-5p | TRIP10    |
| hsa-miR-93-5p | TSG101    |
| hsa-miR-93-5p | UBXN2A    |
| hsa-miR-93-5p | VLDLR     |
| hsa-miR-93-5p | ZC3H12C   |
| hsa-miR-93-5p | ZNF148    |
| hsa-miR-93-5p | ZNFX1     |
| hsa-miR-9-5p  | CAPZA1    |
| hsa-miR-9-5p  | CCNG1     |
| hsa-miR-9-5p  | FAM46A    |
| hsa-miR-9-5p  | KLF5      |

|        |         |
|--------|---------|
| RB1    | FAM46B  |
| RBL2   | FAM46B  |
| ESR1   | FAM46C  |
| TFAP2C | FAM46C  |
| RUNX1  | FAM49A  |
| BACH1  | FAM49B  |
| EPAS1  | FAM63B  |
| EPAS1  | FAM65C  |
| HIF1A  | FAM65C  |
| STAT1  | FAM65C  |
| TFAP2C | FAM65C  |
| STAT6  | FAM69A  |
| STAT1  | FAM71A  |
| RB1    | FAM73A  |
| E2F4   | FAM76A  |
| RB1    | FAM76A  |
| RBL2   | FAM76A  |
| EGR1   | FAM78A  |
| ZNF263 | FAM78A  |
| TFAP2C | FAM83A  |
| TFAP2C | FAM83H  |
| EGR1   | FAM84A  |
| RBL2   | FAM87B  |
| STAT6  | FAM96A  |
| HIF1A  | FANCD2  |
| STAT1  | FAP     |
| ZNF263 | FARP2   |
| RUNX1  | FARS2   |
| CEBPB  | FASLG   |
| FOXA1  | FASLG   |
| HIF1A  | FASTKD2 |

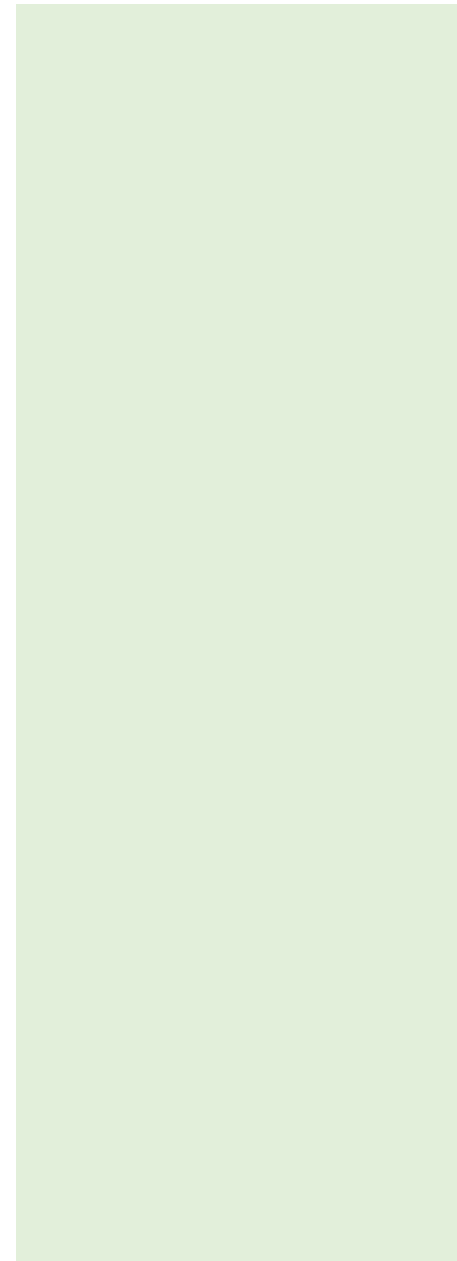

|               |          |
|---------------|----------|
| hsa-miR-9-5p  | LDLRAP1  |
| hsa-miR-9-5p  | MAP3K3   |
| hsa-miR-9-5p  | MESDC1   |
| hsa-miR-9-5p  | NFATC3   |
| hsa-miR-9-5p  | ONECUT2  |
| hsa-miR-9-5p  | PRDM1    |
| hsa-miR-9-5p  | PXDN     |
| hsa-miR-9-5p  | RAB34    |
| hsa-miR-9-5p  | SIRT1    |
| hsa-miR-9-5p  | SNX7     |
| hsa-miR-9-5p  | SOCS5    |
| hsa-miR-9-5p  | STK3     |
| hsa-miR-9-5p  | SYAP1    |
| hsa-miR-9-5p  | TGFBI    |
| hsa-miR-9-5p  | ZBED3    |
| hsa-miR-96-5p | ADCY6    |
| hsa-miR-96-5p | APPL1    |
| hsa-miR-96-5p | CNNM3    |
| hsa-miR-96-5p | FOXO1    |
| hsa-miR-96-5p | FRS2     |
| hsa-miR-96-5p | JAZF1    |
| hsa-miR-96-5p | MED1     |
| hsa-miR-96-5p | MTHFD2L  |
| hsa-miR-96-5p | PRDM16   |
| hsa-miR-96-5p | PRKAR1A  |
| hsa-miR-96-5p | PRKCE    |
| hsa-miR-96-5p | PROSC    |
| hsa-miR-96-5p | SLC39A1  |
| hsa-miR-98-5p | ARHGAP28 |
| hsa-miR-98-5p | CCNJ     |
| hsa-miR-98-5p | CHD4     |

|         |        |
|---------|--------|
| EGR1    | FAT3   |
| CTCF    | FBLIM1 |
| ESR1    | FBLIM1 |
| ESR2    | FBLIM1 |
| ETS1    | FBLIM1 |
| GATA2   | FBLIM1 |
| GATA3   | FBLIM1 |
| RB1     | FBLIM1 |
| RBL2    | FBLIM1 |
| IGF1R   | FBN1   |
| STAT6   | FBN1   |
| ZNF263  | FBRSL1 |
| EGR1    | FBXL12 |
| STAT1   | FBXL14 |
| ZNF263  | FBXL18 |
| EPAS1   | FBXO16 |
| HIF1A   | FBXO16 |
| CEBPA   | FBXO2  |
| CTCF    | FBXO2  |
| ETS1    | FBXO2  |
| MITF    | FBXO2  |
| SMARCA4 | FBXO2  |
| FOS     | FBXO24 |
| E2F4    | FBXO42 |
| ETS1    | FBXO42 |
| GATA2   | FBXO42 |
| RB1     | FBXO42 |
| RBL2    | FBXO42 |
| SMARCA4 | FBXO42 |
| ESR1    | FBXW4  |
| EPAS1   | FBXW7  |



|                |         |
|----------------|---------|
| hsa-miR-98-5p  | CLP1    |
| hsa-miR-98-5p  | COIL    |
| hsa-miR-98-5p  | CPA4    |
| hsa-miR-98-5p  | E2F6    |
| hsa-miR-98-5p  | FNDC3A  |
| hsa-miR-98-5p  | FZD3    |
| hsa-miR-98-5p  | GNG5    |
| hsa-miR-98-5p  | GNPTAB  |
| hsa-miR-98-5p  | HMGA1   |
| hsa-miR-98-5p  | HMGA2   |
| hsa-miR-98-5p  | NME6    |
| hsa-miR-98-5p  | NRAS    |
| hsa-miR-98-5p  | PGRMC1  |
| hsa-miR-98-5p  | PLAGL2  |
| hsa-miR-98-5p  | RGS16   |
| hsa-miR-98-5p  | SLC20A1 |
| hsa-miR-98-5p  | SLC5A6  |
| hsa-miR-98-5p  | TARBP2  |
| hsa-miR-98-5p  | TGFBR1  |
| hsa-miR-98-5p  | TMEM2   |
| hsa-miR-98-5p  | TTL4    |
| hsa-miR-98-5p  | YOD1    |
| hsa-miR-99a-5p | MTOR    |
| hsa-miR-99b-5p | MTOR    |

|         |        |
|---------|--------|
| TP53    | FCAMR  |
| SPI1    | FCGR1A |
| STAT1   | FCGR1A |
| Spi1    | FCGR1B |
| TP53    | FCGR2A |
| TP53    | FCGR2C |
| TRIM28  | FCGR3A |
| RUNX1   | FCHO2  |
| STAT6   | FCHSD2 |
| STAT6   | FCRL1  |
| FOS     | FDFT1  |
| TP53    | FDPSP1 |
| SPI1    | FES    |
| Spi1    | FES    |
| STAT1   | FGD5   |
| BACH1   | FGF1   |
| STAT6   | FGF11  |
| RXRA    | FGF8   |
| STAT1   | FGGY   |
| TAL1    | FGGY   |
| TP53    | FGGY   |
| E2F4    | FGR    |
| CTCF    | FHAD1  |
| MITF    | FHAD1  |
| RB1     | FHAD1  |
| RBL2    | FHAD1  |
| ESR1    | FHAD1  |
| GATA2   | FHAD1  |
| GATA3   | FHAD1  |
| SMARCA4 | FHAD1  |
| RB1     | FHL3   |

|        |         |
|--------|---------|
| RBL2   | FHL3    |
| TAL1   | FHL3    |
| ZNF263 | FIBCD1  |
| SOX2   | FILIP1L |
| HIF1A  | FKBP15  |
| FOS    | FLAD1   |
| EGR1   | FLT4    |
| TRIM28 | FLVCR1  |
| FOS    | FLYWCH1 |
| STAT6  | FMNL3   |
| HNF4A  | FMO1    |
| STAT6  | FMO1    |
| TRIM28 | FMO2    |
| TP53   | FMO7P   |
| TRIM28 | FMOD    |
| SP1    | FN1     |
| RUNX1  | FNBP1   |
| TRIM28 | FNBP1L  |
| E2F4   | FNDC5   |
| TP53   | FNDC7   |
| HIF1A  | FNIP1   |
| NFATC1 | FOLH1   |
| NFATC1 | FOLH1B  |
| EPAS1  | FOS     |
| SRF    | FOS     |
| STAT1  | FOS     |
| EPAS1  | FOXA1   |
| FOXA1  | FOXA1   |
| RXRA   | FOXA1   |
| TFAP2C | FOXA1   |
| RUNX1  | FOXB1   |

|        |         |
|--------|---------|
| PRDM14 | FOXJ1   |
| ESR1   | FOXJ3   |
| STAT1  | FOXK1   |
| STAT6  | FOXK2   |
| EGR1   | FOXL1   |
| FOXA1  | FOXN3   |
| STAT6  | FOXN3   |
| EPAS1  | FOXO3   |
| ESR1   | FOXO6   |
| TP53   | FOXO6   |
| FOXA1  | FOXP1   |
| STAT1  | FOXP1   |
| FOXA1  | FOXP4   |
| STAT1  | FPGS    |
| ESR1   | FRMD4A  |
| STAT1  | FRMD8   |
| ZNF263 | FRY     |
| FOS    | FRYL    |
| RUNX1  | FRYL    |
| ZNF263 | FSCN1   |
| RUNX1  | FSIP1   |
| STAT1  | FST     |
| FOXA1  | FSTL5   |
| BACH1  | FTH1    |
| HIF1A  | FTH1    |
| NFE2L2 | FTH1    |
| SOX2   | FTH1P10 |
| FOXA1  | FTH1P20 |
| ZNF263 | FTH1P22 |
| BACH1  | FTL     |
| NFE2L2 | FTL     |

|        |           |
|--------|-----------|
| TFAP2C | FTLP1     |
| RUNX1  | FTO       |
| STAT1  | FTO       |
| RB1    | FUBP1     |
| STAT6  | FUBP1     |
| TP53   | FUBP1     |
| TP53   | FUCA1     |
| STAT6  | FUK       |
| STAT6  | FUS       |
| EPAS1  | FUT11     |
| FOXA1  | FUT8      |
| HIF1A  | FUT8      |
| PRDM14 | FXR2      |
| PRDM14 | FZD2      |
| HIF1A  | FZD3      |
| SOX2   | FZD9      |
| FOS    | G3BP1     |
| CEBPA  | G6PC      |
| FOXM1  | G6PC      |
| HNF1A  | G6PC      |
| HNF4A  | G6PC      |
| STAT1  | GAB1      |
| ZNF263 | GABARAP   |
| STAT1  | GABARAPL1 |
| HNF4A  | GABRD     |
| RUNX1  | GABRG3    |
| HIF1A  | GABRR1    |
| ZNF263 | GAD1      |
| SOX2   | GADD45A   |
| TP53   | GADD45A   |
| EPAS1  | GADD45B   |



|        |          |
|--------|----------|
| FOXA1  | GADD45G  |
| ESR1   | GAL      |
| IGF1R  | GALC     |
| STAT6  | GALC     |
| ZNF263 | GALC     |
| E2F4   | GALE     |
| RB1    | GALE     |
| FOXA1  | GALNT10  |
| EGR1   | GALNT18  |
| IGF1R  | GALNT18  |
| TP53   | GALNT2   |
| STAT1  | GALNTL6  |
| EPAS1  | GAPDH    |
| EGR1   | GAPDHP15 |
| PRDM14 | GAPDHP15 |
| ZNF263 | GAPDHP15 |
| ZNF263 | GAPDHP16 |
| ESR1   | GAPDHP20 |
| BACH1  | GAPDHP71 |
| FOXA1  | GAPVD1   |
| RUNX1  | GARNL3   |
| EGR1   | GATA2    |
| FOS    | GATAD2A  |
| FOS    | GATAD2B  |
| PRDM14 | GBA      |
| EPAS1  | GBE1     |
| HIF1A  | GBE1     |
| PRDM14 | GBF1     |
| STAT1  | GBP1     |
| TAL1   | GBP4     |
| TAL1   | GBP5     |

|        |        |
|--------|--------|
| TP53   | GBP5   |
| HNF1A  | GC     |
| STAT1  | GCHFR  |
| BACH1  | GCLC   |
| BACH1  | GCLM   |
| ESR1   | GCLM   |
| NFE2L2 | GCLM   |
| FOXA1  | GCNT2  |
| EGR1   | GCSH   |
| ESR1   | GDAP2  |
| STAT6  | GDI2   |
| TFAP2C | GDPD3  |
| FOS    | GET4   |
| FOS    | GFAP   |
| JUN    | GFAP   |
| NFIA   | GFAP   |
| SRF    | GFAP   |
| TAL1   | GFI1   |
| TRIM28 | GFI1   |
| ESR1   | GFRA1  |
| RUNX1  | GFRA1  |
| TP53   | GGPS1  |
| HIF1A  | GID4   |
| PRDM14 | GIMAP5 |
| EGR1   | GIPC2  |
| STAT6  | GIPC2  |
| TAL1   | GIPC2  |
| TP53   | GIPC2  |
| RB1    | GJA9   |
| EGR2   | GJB1   |
| sox10  | GJB1   |

|         |       |
|---------|-------|
| ZEB2    | GJB2  |
| RUNX1   | GLG1  |
| PRDM14  | GLI3  |
| RB1     | GLIS1 |
| TAL1    | GLIS1 |
| REST    | GLRA1 |
| HIF1A   | GMCL1 |
| E2F4    | GMEB1 |
| RB1     | GMEB1 |
| RBL2    | GMEB1 |
| RUNX1   | GMEB2 |
| FOXA1   | GNA14 |
| TFAP2C  | GNA14 |
| NFE2L2  | GNAI2 |
| RUNX1   | GNAQ  |
| ZNF263  | GNAQ  |
| ZNF263  | GNAZ  |
| CEBPA   | GNB1  |
| CTCF    | GNB1  |
| E2F4    | GNB1  |
| ESR2    | GNB1  |
| ETS1    | GNB1  |
| GATA2   | GNB1  |
| GATA3   | GNB1  |
| HNF4A   | GNB1  |
| MITF    | GNB1  |
| RB1     | GNB1  |
| SMARCA4 | GNB1  |
| TAL1    | GNB1  |
| RB1     | GNG12 |
| TP53    | GNG12 |

|        |          |
|--------|----------|
| TRIM28 | GNG12    |
| EPAS1  | GNG7     |
| E2F4   | GNL2     |
| RB1    | GNL2     |
| TRIM28 | GNPAT    |
| STAT1  | GNPDA1   |
| STAT6  | GNS      |
| HIF1A  | GOLGA1   |
| RUNX1  | GOLGA1   |
| FOXA1  | GOLM1    |
| FOS    | GOLPH3L  |
| STAT1  | GON4L    |
| FOS    | GOT1     |
| STAT1  | GP9      |
| ESR1   | GPAM     |
| HIF1A  | GPATCH11 |
| E2F4   | GPATCH3  |
| RBL2   | GPATCH3  |
| RB1    | GPBP1L1  |
| RBL2   | GPBP1L1  |
| HIF1A  | GPHA2    |
| HIF1A  | GPHN     |
| ZNF263 | GPIHBP1  |
| STAT1  | GPR107   |
| FOS    | GPR108   |
| TFAP2C | GPR132   |
| CEBPA  | GPR153   |
| HNF4A  | GPR153   |
| RB1    | GPR153   |
| RBL2   | GPR153   |
| CEBPA  | GPR157   |

|        |         |
|--------|---------|
| CTCF   | GPR157  |
| E2F4   | GPR157  |
| EGR1   | GPR157  |
| ESR1   | GPR157  |
| ESR2   | GPR157  |
| ETS1   | GPR157  |
| HNF4A  | GPR157  |
| MITF   | GPR157  |
| STAT6  | GPR19   |
| HIF1A  | GPR21   |
| ESR1   | GPR26   |
| E2F4   | GPR3    |
| RB1    | GPR3    |
| EPAS1  | GPR37L1 |
| TFAP2C | GPR37L1 |
| HIF1A  | GPR61   |
| FOS    | GPR84   |
| FOXA1  | GPR85   |
| HIF1A  | GPRIN3  |
| NFE2L2 | GPX2    |
| FOXA1  | GRAMD1A |
| TFAP2C | GRAMD1A |
| HIF1A  | GRB10   |
| TFAP2C | GREB1   |
| EPAS1  | GREM2   |
| EPAS1  | GRHL2   |
| FOXA1  | GRHL2   |
| TFAP2C | GRHL2   |
| E2F4   | GRHL3   |
| GATA2  | GRHL3   |
| GATA3  | GRHL3   |

|        |             |
|--------|-------------|
| ESR1   | GRIK3       |
| TP53   | GRIK3       |
| TRIM28 | GRIK3       |
| STAT6  | GRIP1       |
| ESR1   | GRK5        |
| FOS    | GRK6        |
| TFAP2C | GRM8        |
| HIF1A  | GRPEL1      |
| STAT1  | GSDMD       |
| EGR1   | GSE1        |
| TFAP2C | GSE1        |
| PRDM14 | GSN         |
| RUNX1  | GSTA4       |
| FOXA1  | GSTA7P      |
| HIF1A  | GSTA7P      |
| ESR1   | GSTM5       |
| ESR1   | GSTO1       |
| STAT6  | GSTO2       |
| STAT6  | GTF2A1      |
| TP53   | GTF2B       |
| TAL1   | GTF2F2P2    |
| EPAS1  | GTF2IRD2B   |
| HIF1A  | GTF3C4      |
| NFE2L2 | GUCA1B      |
| ESR1   | GUCA2A      |
| ESR1   | GUCA2B      |
| HNF4A  | GUCY2C      |
| PRDM14 | GXYLT1      |
| TAL1   | GYG1P3      |
| RUNX1  | GYPE        |
| IGF1R  | H19; MIR675 |

|         |        |
|---------|--------|
| FOS     | H2AFV  |
| ESR1    | H2AFY2 |
| PRDM14  | H2AFY2 |
| CEBPA   | H6PD   |
| CTCF    | H6PD   |
| E2F4    | H6PD   |
| ESR2    | H6PD   |
| ETS1    | H6PD   |
| HNF4A   | H6PD   |
| MITF    | H6PD   |
| RB1     | H6PD   |
| RBL2    | H6PD   |
| SMARCA4 | H6PD   |
| STAT1   | HAAO   |
| EGR1    | HADHB  |
| TP53    | HAO2   |
| ZNF263  | HAS1   |
| STAT1   | HAS2   |
| HIF1A   | HAT1   |
| Fos     | HBEGF  |
| Jun     | HBEGF  |
| SP1     | HBEGF  |
| SP4     | HBEGF  |
| FOS     | HBP1   |
| STAT6   | HBQ1   |
| HIF1A   | HCG4   |
| E2F4    | HDAC1  |
| ESR1    | HDAC1  |
| STAT1   | HDAC4  |
| STAT1   | HDAC8  |
| ZNF263  | HDDC2  |

|        |        |
|--------|--------|
| TFAP2C | HEATR6 |
| RB1    | HECTD3 |
| STAT1  | HEG1   |
| STAT6  | HELLS  |
| TFAP2C | HES1   |
| CEBPA  | HES2   |
| E2F4   | HES2   |
| GATA2  | HES2   |
| TP53   | HES2   |
| CEBPA  | HES3   |
| CTCF   | HES3   |
| ETS1   | HES3   |
| RB1    | HES3   |
| CEBPA  | HES4   |
| CTCF   | HES4   |
| ESR1   | HES4   |
| ESR2   | HES4   |
| GATA3  | HES4   |
| HNF4A  | HES4   |
| RB1    | HES4   |
| RBL2   | HES4   |
| PRDM14 | HES7   |
| ZNF263 | HEXIM1 |
| FOXA1  | HEY2   |
| SOX2   | HEY2   |
| TFAP2C | HEY2   |
| TRIM28 | HFE2   |
| EGR1   | HFM1   |
| IGF1R  | HFM1   |
| TAL1   | HFM1   |
| TP53   | HFM1   |



|        |           |
|--------|-----------|
| ZNF263 | HFM1      |
| PRDM14 | HHAT      |
| STAT1  | HHAT      |
| TP53   | HHAT      |
| RUNX1  | HHIP      |
| EPAS1  | HIF1A     |
| STAT1  | HIGD2A    |
| EPAS1  | HILPDA    |
| ESR1   | HIPK1     |
| STAT6  | HIPK3     |
| FOS    | HIST1H2AG |
| SRF    | HIST1H2AG |
| FOS    | HIST1H2BK |
| EPAS1  | HIST1H4H  |
| TRIM28 | HIST2H3D  |
| TRIM28 | HIST2H4A  |
| EPAS1  | HIVEP2    |
| ESR1   | HIVEP3    |
| RB1    | HIVEP3    |
| STAT6  | HIVEP3    |
| TAL1   | HIVEP3    |
| TP53   | HIVEP3    |
| TRIM28 | HIVEP3    |
| EPAS1  | HK1       |
| ESR1   | HK1       |
| EPAS1  | HK2       |
| ESR1   | HKDC1     |
| STAT1  | HLA-E     |
| STAT1  | HLX       |
| TRIM28 | HLX       |
| FOXA1  | HMCN1     |

|       |           |
|-------|-----------|
| HIF1A | HMGA1P6   |
| TAL1  | HMGB1P18  |
| TP53  | HMGB1P18  |
| RUNX1 | HMGB1P5   |
| HIF1A | HMGCL     |
| RBL2  | HMGCL     |
| FOS   | HMGCS1    |
| FOXA1 | HMGCS2    |
| SRF   | HMGCS2    |
| FOXA1 | HMGN1P38  |
| RB1   | HMGN2     |
| RBL2  | HMGN2     |
| E2F4  | HMGN2     |
| CEBPA | HMGN2P17  |
| GATA3 | HMGN2P17  |
| RUNX1 | HMGN3P1   |
| HIF1A | HMMR      |
| BACH1 | HMOX1     |
| USF1  | HMOX1     |
| STAT6 | HMOX2     |
| ESR1  | HMX3      |
| HNF4A | HNF1A     |
| HNF1A | HNF4A     |
| STAT1 | HNMT      |
| FOS   | HNRNPA1   |
| ESR1  | HNRNPA3   |
| ESR1  | HNRNPA3P1 |
| SOX2  | HNRNPA3P5 |
| FOS   | HNRNPC    |
| STAT6 | HNRNPH3   |
| HIF1A | HNRNPK    |

|        |          |
|--------|----------|
| FOS    | HNRNPL   |
| E2F4   | HNRNPR   |
| GATA2  | HNRNPR   |
| GATA3  | HNRNPR   |
| RB1    | HNRNPR   |
| RBL2   | HNRNPR   |
| FOS    | HNRNPUL1 |
| STAT1  | HNRNPUL2 |
| ZNF263 | HOMER1   |
| PRDM14 | HOMEZ    |
| RXRA   | HOXA1    |
| EPAS1  | HOXA4    |
| RXRA   | HOXA4    |
| Hoxa5  | HOXA5    |
| RXRA   | HOXA7    |
| RXRA   | HOXB1    |
| RXRA   | HOXB4    |
| RXRA   | HOXB5    |
| RXRA   | HOXD4    |
| E2F4   | HP1BP3   |
| ESR2   | HP1BP3   |
| ETS1   | HP1BP3   |
| TRIM28 | HPDL     |
| HIF1A  | HPS3     |
| HIF1A  | HPS5     |
| EPAS1  | HS1BP3   |
| RB1    | HS2ST1   |
| TAL1   | HS2ST1   |
| TP53   | HS2ST1   |
| TRIM28 | HS2ST1   |
| ZNF263 | HS2ST1   |

|        |              |
|--------|--------------|
| SOX2   | HS3ST1       |
| STAT1  | HS3ST1       |
| EPAS1  | HS6ST3       |
| RUNX1  | hsa-miR-1247 |
| TP53   | hsa-miR-137  |
| TP53   | hsa-miR-137  |
| EGR1   | hsa-miR-1977 |
| IGF1R  | hsa-miR-1977 |
| TP53   | hsa-miR-205  |
| PRDM14 | hsa-miR-663  |
| TP53   | HSD3BP5      |
| SP1    | HSPA1A       |
| FOS    | HSPA5        |
| HIF1A  | HSPA9        |
| RB1    | HSPB11       |
| FOS    | HSPB6        |
| RB1    | HSPB7        |
| RBL2   | HSPB7        |
| RBL2   | HSPG2        |
| GATA2  | HSPG2        |
| GATA3  | HSPG2        |
| EGR1   | HSPG2        |
| CC2D1A | HTR1A        |
| DEAF1  | HTR1A        |
| Fev    | HTR1A        |
| MAZ    | HTR1A        |
| REST   | HTR1A        |
| SP1    | HTR1A        |
| GATA2  | HTR1D        |
| GATA3  | HTR1D        |
| RB1    | HTR6         |

|        |       |
|--------|-------|
| BACH1  | HTRA3 |
| STAT6  | HVCN1 |
| FOXA1  | HYAL4 |
| FEV    | ICAM1 |
| STAT1  | ICAM1 |
| ZNF263 | ICAM5 |
| SOX2   | ICE1  |
| STAT1  | ICE1  |
| ESR2   | ICMT  |
| STAT6  | ICT1  |
| STAT1  | ID1   |
| TFAP2C | ID1   |
| E2F4   | ID3   |
| GATA2  | ID3   |
| RB1    | ID3   |
| RBL2   | ID3   |
| STAT1  | IDO1  |
| STAT1  | IDO2  |
| STAT1  | IER2  |
| RUNX1  | IER5  |
| TFAP2C | IER5  |
| TP53   | IER5  |
| TRIM28 | IER5  |
| PRDM14 | IER5L |
| ESR1   | IFFO2 |
| ESR2   | IFFO2 |
| ETS1   | IFFO2 |
| GATA2  | IFFO2 |
| GATA3  | IFFO2 |
| MITF   | IFFO2 |
| RB1    | IFFO2 |

|        |         |
|--------|---------|
| RBL2   | IFFO2   |
| STAT1  | IFI16   |
| TRIM28 | IFI16   |
| TAL1   | IFI44L  |
| RB1    | IFI6    |
| RBL2   | IFI6    |
| STAT1  | IFI6    |
| STAT1  | IFIT1   |
| STAT1  | IFITM1  |
| HMGA2  | IFNB1   |
| STAT1  | IFNGR1  |
| E2F4   | IFNLR1  |
| GATA2  | IFNLR1  |
| STAT6  | IFNLR1  |
| BACH1  | IFRD1   |
| TFAP2C | IFT122  |
| STAT6  | IFT46   |
| CEBPA  | IGF1    |
| HNF1A  | IGF1    |
| IGF1R  | IGF1R   |
| VDR    | IGFBP3  |
| EPAS1  | IGFBP5  |
| TCF3   | IGFBP6  |
| STAT1  | IGFLR1  |
| STAT6  | IGHA1   |
| STAT6  | IGHA2   |
| STAT6  | IGHD    |
| RUNX1  | IGHV1-2 |
| SPI1   | IGJ     |
| ZNF263 | IGLC3   |
| EGR1   | IGLC7   |

|        |          |
|--------|----------|
| EGR1   | IGLVI-20 |
| ESR1   | IGSF21   |
| ESR2   | IGSF21   |
| GATA3  | IGSF21   |
| TRIM28 | IGSF21   |
| ESR1   | IGSF3    |
| FOXA1  | IKZF2    |
| IRF1   | IL10     |
| SP1    | IL10     |
| STAT1  | IL10     |
| STAT3  | IL10     |
| HIF1A  | IL12A    |
| EGR1   | IL12B    |
| TRIM28 | IL12RB2  |
| SRF    | IL13     |
| PRDM14 | IL17RD   |
| TP53   | IL19     |
| FOXA1  | IL1R1    |
| STAT1  | IL1R1    |
| PRDM14 | IL1RAPL1 |
| Spi1   | IL1RN    |
| NFAT1  | IL2      |
| NFATC1 | IL2      |
| SRF    | IL2      |
| TP53   | IL20     |
| RUNX1  | IL21     |
| TP53   | IL22RA1  |
| TP53   | IL23R    |
| RUNX1  | IL3      |
| LBP    | IL4      |
| NFAM1  | IL4      |

|        |          |
|--------|----------|
| NFAT1  | IL4      |
| STAT6  | IL4R     |
| SRF    | IL5      |
| SOX2   | IL6      |
| EPAS1  | IL6R     |
| STAT1  | IL6ST    |
| EPAS1  | ILVBL    |
| HIF1A  | IMMT     |
| ESR1   | INADL    |
| TP53   | INADL    |
| FOS    | INCENP   |
| ZNF263 | INF2     |
| HIF1A  | ING2     |
| HIF1A  | INHA     |
| EPAS1  | INHBA    |
| HIF1A  | INHBA    |
| STAT1  | INHBA    |
| STAT6  | INHBE    |
| STAT6  | INO80    |
| STAT6  | INPP5A   |
| RB1    | INPP5B   |
| RBL2   | INPP5B   |
| TAL1   | INPP5B   |
| TP53   | INPP5B   |
| HIF1A  | INSIG1   |
| HIF1A  | INSIG2   |
| HNF1A  | INS-IGF2 |
| SRF    | INS-IGF2 |
| HIF1A  | IP6K1    |
| BACH1  | IPO7     |
| RB1    | IPP      |



|         |         |
|---------|---------|
| RBL2    | IPP     |
| RB1     | IQCC    |
| FOS     | IQCD    |
| RUNX1   | IQGAP2  |
| STAT1   | IRF1    |
| STAT3   | IRF1    |
| STAT1   | IRF2    |
| EPAS1   | IRF2BP2 |
| TP53    | IRF2BP2 |
| FOXA1   | IRF2BPL |
| STAT6   | IRF8    |
| EPAS1   | IRX1    |
| RUNX1   | IRX3    |
| ETS1    | ISG15   |
| GATA2   | ISG15   |
| HNF4A   | ISG15   |
| RB1     | ISG15   |
| RBL2    | ISG15   |
| SMARCA4 | ISG15   |
| STAT1   | ISG15   |
| STAT1   | ISG20   |
| STAT6   | ISG20   |
| FOS     | ISOC2   |
| RUNX1   | ISPD    |
| RUNX1   | ITGA1   |
| EPAS1   | ITGA5   |
| ESR1    | ITGA8   |
| SP1     | ITGAM   |
| SPI1    | ITGAM   |
| Spi1    | ITGAM   |
| ZNF148  | ITGAM   |

|        |         |
|--------|---------|
| TFAP2C | ITGB4   |
| STAT1  | ITGB6   |
| STAT1  | ITIH4   |
| TFAP2C | ITPK1   |
| STAT6  | ITPKB   |
| STAT1  | ITPKC   |
| PLSCR1 | ITPR1   |
| BACH1  | ITPR2   |
| TRIM28 | IVL     |
| ESR1   | JAK1    |
| TAL1   | JAK1    |
| TP53   | JAK1    |
| ESR1   | JAKMIP3 |
| SOX2   | JAKMIP3 |
| STAT1  | JDP2    |
| ESR1   | JMJD1C  |
| EGR1   | JOSD2   |
| HIF1A  | JUN     |
| RB1    | JUN     |
| SP1    | JUN     |
| TRIM28 | JUN     |
| EPAS1  | JUNB    |
| HIF1A  | JUND    |
| FOS    | JUP     |
| SOX2   | KANK1   |
| PRDM14 | KANK4   |
| TRIM28 | KANK4   |
| STAT6  | KAT5    |
| FOS    | KAT6B   |
| STAT6  | KAT7    |
| RUNX1  | KATNAL1 |

|         |         |
|---------|---------|
| FOS     | KATNB1  |
| STAT6   | KAZALD1 |
| CTCF    | KAZN    |
| ESR1    | KAZN    |
| ESR2    | KAZN    |
| ETS1    | KAZN    |
| GATA2   | KAZN    |
| GATA3   | KAZN    |
| PRDM14  | KAZN    |
| SMARCA4 | KAZN    |
| TP53    | KAZN    |
| EGR1    | KBTBD2  |
| STAT6   | KBTBD7  |
| ESR1    | KCNA2   |
| PRDM14  | KCNA4   |
| CEBPA   | KCNAB2  |
| CTCF    | KCNAB2  |
| E2F4    | KCNAB2  |
| ESR2    | KCNAB2  |
| ETS1    | KCNAB2  |
| FOS     | KCNAB2  |
| HNF4A   | KCNAB2  |
| MITF    | KCNAB2  |
| RB1     | KCNAB2  |
| RBL2    | KCNAB2  |
| SMARCA4 | KCNAB2  |
| TAL1    | KCNAB2  |
| ZNF263  | KCNC3   |
| STAT1   | KCND2   |
| ESR1    | KCND3   |
| FOXA1   | KCND3   |

|        |         |
|--------|---------|
| HIF1A  | KCNE4   |
| FOXA1  | KCNH5   |
| HIF1A  | KCNH5   |
| ESR1   | KCNIP2  |
| HIF1A  | KCNJ2   |
| TP53   | KCNK1   |
| TP53   | KCNK2   |
| EPAS1  | KCNMA1  |
| ESR1   | KCNMA1  |
| STAT6  | KCNN3   |
| TP53   | KCNN3   |
| PRDM14 | KCNQ3   |
| STAT1  | KCNU1   |
| EPAS1  | KCTD11  |
| ESR1   | KDF1    |
| ESR2   | KDF1    |
| E2F4   | KDM1A   |
| GATA2  | KDM1A   |
| GATA3  | KDM1A   |
| RB1    | KDM1A   |
| RBL2   | KDM1A   |
| EGR1   | KDM1B   |
| HIF1A  | KDM3A   |
| FOS    | KDM4A   |
| RBL2   | KDM4A   |
| FOS    | KDM4B   |
| HIF1A  | KDM4C   |
| HIF1A  | KDM5B   |
| E2F4   | KHDRBS1 |
| RB1    | KHDRBS1 |
| TRIM28 | KHDRBS1 |

|         |           |
|---------|-----------|
| EPAS1   | KIAA0195  |
| FOXA1   | KIAA0195  |
| FOXA1   | KIAA0196  |
| E2F4    | KIAA0319L |
| BACH1   | KIAA0355  |
| EPAS1   | KIAA0355  |
| ESR1    | KIAA0754  |
| RB1     | KIAA0754  |
| RBL2    | KIAA0754  |
| STAT1   | KIAA0754  |
| TAL1    | KIAA0754  |
| TP53    | KIAA0754  |
| TRIM28  | KIAA0754  |
| HIF1A   | KIAA0922  |
| STAT6   | KIAA1033  |
| TP53    | KIAA1324  |
| TRIM28  | KIAA1324  |
| ESR1    | KIAA1324  |
| FOXA1   | KIAA1429  |
| RUNX1   | KIAA1462  |
| GATA2   | KIAA1522  |
| RB1     | KIAA1522  |
| TAL1    | KIAA1522  |
| BACH1   | KIAA1549  |
| STAT6   | KIAA1549L |
| HIF1A   | KIAA1715  |
| TRIM28  | KIAA1804  |
| RB1     | KIAA2013  |
| SMARCA4 | KIAA2013  |
| ETS1    | KIAA2013  |
| GATA3   | KIAA2013  |

|         |          |
|---------|----------|
| HIF1A   | KIAA2013 |
| MITF    | KIAA2013 |
| E2F4    | KIF17    |
| GATA2   | KIF17    |
| RB1     | KIF17    |
| RBL2    | KIF17    |
| CEBPA   | KIF1B    |
| CTCF    | KIF1B    |
| E2F4    | KIF1B    |
| ETS1    | KIF1B    |
| GATA2   | KIF1B    |
| GATA3   | KIF1B    |
| HNF4A   | KIF1B    |
| RB1     | KIF1B    |
| RBL2    | KIF1B    |
| SMARCA4 | KIF1B    |
| TFAP2C  | KIF21A   |
| EGR1    | KIF26B   |
| RUNX1   | KIF26B   |
| TRIM28  | KIF26B   |
| STAT1   | KIF2A    |
| RB1     | KIF2C    |
| RBL2    | KIF2C    |
| SOX2    | KIT      |
| TFAP2C  | KLC1     |
| STAT6   | KLC2     |
| EGR1    | KLF10    |
| EPAS1   | KLF10    |
| EGR1    | KLF11    |
| STAT6   | KLF12    |
| STAT6   | KLF13    |

|         |        |
|---------|--------|
| HIF1A   | KLF2   |
| EPAS1   | KLF6   |
| ESR1    | KLF6   |
| STAT1   | KLF6   |
| EPAS1   | KLF7   |
| STAT1   | KLF7   |
| EPAS1   | KLHDC4 |
| STAT6   | KLHDC4 |
| HIF1A   | KLHL11 |
| STAT6   | KLHL12 |
| E2F4    | KLHL17 |
| RB1     | KLHL17 |
| RBL2    | KLHL17 |
| CEBPA   | KLHL21 |
| E2F4    | KLHL21 |
| ESR2    | KLHL21 |
| ETS1    | KLHL21 |
| GATA2   | KLHL21 |
| GATA3   | KLHL21 |
| HNF4A   | KLHL21 |
| MITF    | KLHL21 |
| RB1     | KLHL21 |
| RBL2    | KLHL21 |
| SMARCA4 | KLHL21 |
| EGR1    | KLHL22 |
| HIF1A   | KLHL25 |
| HIF1A   | KLHL31 |
| ZNF263  | KLK1   |
| HIF1A   | KLRB1  |
| FOS     | KMT2A  |
| EPAS1   | KMT2E  |

|        |          |
|--------|----------|
| HIF1A  | KMT2E    |
| STAT1  | KMT2E    |
| RB1    | KPNA6    |
| RBL2   | KPNA6    |
| HIF1A  | KRCC1    |
| RUNX1  | KRI1     |
| RXRA   | KRT18    |
| TFAP2C | KRT18    |
| TP53   | KRT18P28 |
| STAT1  | KRT18P33 |
| RUNX1  | KRT18P51 |
| EPAS1  | KRT19    |
| STAT1  | KRT6A    |
| STAT1  | KRT7     |
| STAT1  | KRT8     |
| TFAP2C | KRT8     |
| EPAS1  | KRT80    |
| TFAP2C | KRT80    |
| STAT1  | KRT81    |
| FOXA1  | KRT85    |
| ZNF263 | KSR1     |
| STAT6  | KSR2     |
| PRDM14 | KY       |
| REST   | L1CAM    |
| STAT6  | LACC1    |
| STAT1  | LACE1    |
| ESR2   | LACTBL1  |
| MAF    | LALBA    |
| RUNX1  | LAMA3    |
| ZNF263 | LAMA5    |
| TRIM28 | LAMB3    |



|        |         |
|--------|---------|
| ZNF263 | LAMC3   |
| STAT1  | LAPTM4B |
| EGR1   | LAPTM5  |
| GATA2  | LAPTM5  |
| RB1    | LAPTM5  |
| STAT6  | LAPTM5  |
| TAL1   | LAPTM5  |
| TP53   | LAPTM5  |
| HIF1A  | LARGE   |
| ZNF263 | LARP1B  |
| FOXA1  | LBH     |
| SOX2   | LCA5    |
| TP53   | LCE1E   |
| TRIM28 | LCE3B   |
| TP53   | LCE5A   |
| FOXA1  | LCOR    |
| SP1    | LCP1    |
| RUNX1  | LCP2    |
| CDX2   | LCT     |
| Gata4  | LCT     |
| Gata5  | LCT     |
| GATA6  | LCT     |
| HNF1A  | LCT     |
| HNF4A  | LCT     |
| POU2F1 | LCT     |
| ESR1   | LDB3    |
| EPAS1  | LDHA    |
| ESR1   | LDHAP5  |
| ESR1   | LDLRAD1 |
| FOXA1  | LDLRAD4 |
| E2F4   | LDLRAP1 |

|        |           |
|--------|-----------|
| ESR1   | LDLRAP1   |
| ESR2   | LDLRAP1   |
| EPAS1  | LEKR1     |
| PRDM14 | LEMD1     |
| FOS    | LENG1     |
| SP1    | LEP       |
| PRDM14 | LETM1     |
| HIF1A  | LGALS8    |
| PRDM14 | LGI1      |
| HIF1A  | LHFPL3    |
| PRDM14 | LHX2      |
| TRIM28 | LHX4      |
| TP53   | LHX8      |
| FOXA1  | LIMA1     |
| STAT1  | LIMA1     |
| STAT1  | LIMCH1    |
| ESR1   | LIN28A    |
| ESR2   | LIN28A    |
| RB1    | LIN28A    |
| TP53   | LIN28A    |
| TFAP2C | LINC00111 |
| EGR1   | LINC00114 |
| ESR2   | LINC00115 |
| ETS1   | LINC00115 |
| GATA3  | LINC00115 |
| EPAS1  | LINC00160 |
| STAT1  | LINC00184 |
| TP53   | LINC00184 |
| PRDM14 | LINC00229 |
| PRDM14 | LINC00269 |
| EGR1   | LINC00273 |

|        |           |
|--------|-----------|
| IGF1R  | LINC00273 |
| STAT6  | LINC00273 |
| PRDM14 | LINC00303 |
| TRIM28 | LINC00303 |
| EGR1   | LINC00311 |
| PRDM14 | LINC00311 |
| TFAP2C | LINC00316 |
| STAT1  | LINC00324 |
| CTCF   | LINC00337 |
| E2F4   | LINC00337 |
| ETS1   | LINC00337 |
| HNF4A  | LINC00337 |
| RB1    | LINC00337 |
| RBL2   | LINC00337 |
| RBL2   | LINC00337 |
| STAT1  | LINC00470 |
| RUNX1  | LINC00477 |
| EGR1   | LINC00574 |
| EPAS1  | LINC00574 |
| ESR1   | LINC00595 |
| FOXA1  | LINC00862 |
| HIF1A  | LINC01550 |
| RUNX1  | LINC01550 |
| RUNX1  | LINC01600 |
| STAT1  | LINS      |
| ESR1   | LIPA      |
| RUNX1  | LIPC      |
| TFAP2C | LLGL2     |
| HIF1A  | LMBR1     |
| SOX2   | LMCD1     |
| HIF1A  | LMLN      |

|        |              |
|--------|--------------|
| TP53   | LMNA         |
| RUNX1  | LMO2         |
| RB1    | LMO4         |
| FOXA1  | LMX1B        |
| TFAP2C | LMX1B        |
| ESR1   | lncRNA       |
| STAT1  | LOC100505984 |
| HIF1A  | LOC100507353 |
| TFAP2C | LOC101060254 |
| CTCF   | LOC101930059 |
| RB1    | LOC101930059 |
| RBL2   | LOC101930059 |
| TP53   | LOC101930059 |
| E2F4   | LOC101930059 |
| ESR1   | LOC101930059 |
| ESR2   | LOC101930059 |
| ETS1   | LOC101930059 |
| GATA3  | LOC101930059 |
| MITF   | LOC101930059 |
| CREB1  | LOC102723386 |
| TFAP2C | LOC102724043 |
| CEBPA  | LOC102724203 |
| CTCF   | LOC102724250 |
| HIF1A  | LOC102724664 |
| BACH1  | LOC102724876 |
| CTCF   | LOC102725471 |
| CTCF   | LOC400736    |
| ZNF263 | LONRF2       |
| EPAS1  | LOX          |
| HIF1A  | LOX          |
| EPAS1  | LOXL2        |

|        |        |
|--------|--------|
| HIF1A  | LOXL3  |
| ESR1   | LOXL4  |
| ESR1   | LPAR3  |
| IGF1R  | LPAR3  |
| TAL1   | LPAR3  |
| ZNF263 | LPCAT1 |
| STAT1  | LPIN1  |
| SRF    | LPL    |
| FOXA1  | LPP    |
| STAT6  | LPXN   |
| STAT1  | LRCH2  |
| TFAP2C | LRFN4  |
| PRDM14 | LRIG1  |
| HIF1A  | LRP4   |
| TFAP2C | LRP5   |
| STAT6  | LRR1   |
| RUNX1  | LRRC1  |
| ESR1   | LRRC20 |
| EGR1   | LRRC27 |
| STAT6  | LRRC32 |
| EGR1   | LRRC3C |
| HIF1A  | LRRC4  |
| RBL2   | LRRC41 |
| RB1    | LRRC42 |
| E2F4   | LRRC47 |
| ESR2   | LRRC47 |
| ETS1   | LRRC47 |
| GATA3  | LRRC47 |
| HNF4A  | LRRC47 |
| MITF   | LRRC47 |
| RBL2   | LRRC47 |

|         |        |
|---------|--------|
| SMARCA4 | LRRC47 |
| FOS     | LRRC48 |
| RB1     | LRRC53 |
| HIF1A   | LRRC56 |
| STAT6   | LRRC59 |
| STAT1   | LRRC61 |
| TAL1    | LRRC7  |
| TP53    | LRRC7  |
| TRIM28  | LRRC7  |
| EGR1    | LRRC8B |
| TAL1    | LRRC8C |
| BACH1   | LRRC8D |
| TP53    | LRRIQ3 |
| STAT6   | LRRK1  |
| STAT1   | LRRN3  |
| EGR1    | LSS    |
| GATA2   | LUZP1  |
| RB1     | LUZP1  |
| RBL2    | LUZP1  |
| EGR1    | LY6E   |
| TFAP2C  | LY6E   |
| STAT6   | LY9    |
| TP53    | LY9    |
| RB1     | LYPLA2 |
| SOX2    | LYRM9  |
| TP53    | LYST   |
| CEBPA   | LZIC   |
| CTCF    | LZIC   |
| ETS1    | LZIC   |
| HNF4A   | LZIC   |
| MITF    | LZIC   |

|        |         |
|--------|---------|
| RB1    | LZIC    |
| RBL2   | LZIC    |
| RUNX1  | LZTFL1  |
| EPAS1  | MAB21L3 |
| ESR1   | MAB21L3 |
| ESR1   | MACF1   |
| RB1    | MACF1   |
| RBL2   | MACF1   |
| STAT1  | MACF1   |
| TAL1   | MACF1   |
| TP53   | MACF1   |
| TRIM28 | MACF1   |
| SP1    | MACROD1 |
| FOXA1  | MACROD2 |
| SOX2   | MACROD2 |
| STAT1  | MACROD2 |
| RUNX1  | MAD1L1  |
| E2F4   | MAD2L2  |
| ETS1   | MAD2L2  |
| RB1    | MAD2L2  |
| RBL2   | MAD2L2  |
| RBL2   | MAD2L2  |
| TP53   | MAEL    |
| EGR1   | MAF     |
| EPAS1  | MAF     |
| EPAS1  | MAFF    |
| BACH1  | MAFG    |
| ESR1   | MAGI3   |
| HIF1A  | MAGI3   |
| RBL2   | MAGOH   |
| STAT6  | MAGOHB  |

|        |          |
|--------|----------|
| STAT6  | MALAT1   |
| COPEB  | MAML1    |
| HIF1A  | MAML1    |
| SP1    | MAML1    |
| STAT6  | MAML2    |
| FOXA1  | MAN1A1   |
| ZNF263 | MAN1A1   |
| ZNF263 | MAN1A2   |
| ESR1   | MAN1C1   |
| ESR2   | MAN1C1   |
| E2F4   | MANEAL   |
| ESR1   | MANEAL   |
| AR     | MAOA     |
| CDCA7L | MAOA     |
| NR3C1  | MAOA     |
| SP1    | MAOA     |
| HIF1A  | MAP1LC3A |
| ZNF263 | MAP2K2   |
| HIF1A  | MAP2K5   |
| E2F4   | MAP3K6   |
| RB1    | MAP3K6   |
| RBL2   | MAP3K6   |
| ESR1   | MAP3K8   |
| RUNX1  | MAP3K8   |
| E2F4   | MAP7D1   |
| PRDM14 | MAP7D1   |
| RB1    | MAP7D1   |
| RBL2   | MAP7D1   |
| EGR1   | MAPK1    |
| FOXA1  | MAPKAP1  |
| HIF1A  | MAPKAP1  |



|        |              |
|--------|--------------|
| STAT6  | MAPKAPK5-AS1 |
| BACH1  | MAPT         |
| RUNX1  | MARCH1       |
| TFAP2C | MARCH10      |
| STAT1  | MARCH7       |
| HIF1A  | MARCKS       |
| E2F4   | MARCKSL1     |
| RB1    | MARCKSL1     |
| ESR1   | MARVELD1     |
| EGR1   | MARVELD3     |
| CTCF   | MASP2        |
| RB1    | MAST2        |
| STAT6  | MAST2        |
| TP53   | MAST2        |
| ESR1   | MATN1        |
| ESR2   | MATN1        |
| RB1    | MATN1        |
| RBL2   | MATN1        |
| TP53   | MATN1        |
| TRIM28 | MATN1        |
| SRF    | MB           |
| PRDM14 | MBNL2        |
| SP1    | MBP          |
| STAT6  | MBTPS1       |
| EGR1   | MCFD2        |
| FOXA1  | MCTP2        |
| RUNX1  | MCTP2        |
| EPAS1  | MDGA2        |
| HIF1A  | MDH1         |
| RXRA   | MDK          |
| STAT6  | MDM2         |

|        |        |
|--------|--------|
| TP53   | MDM4   |
| TRIM28 | MDM4   |
| STAT6  | MDP1   |
| ESR2   | MDS2   |
| STAT6  | MDS2   |
| TP53   | MDS2   |
| GATA3  | MDS2   |
| BACH1  | ME1    |
| EGR1   | ME1    |
| FOXA1  | ME3    |
| RUNX1  | ME3    |
| STAT1  | ME3    |
| E2F4   | MEAF6  |
| ESR1   | MEAF6  |
| RB1    | MEAF6  |
| ESR2   | MECR   |
| GATA2  | MECR   |
| RBL2   | MECR   |
| ZNF263 | MED10  |
| RUNX1  | MED12L |
| RB1    | MED18  |
| RBL2   | MED18  |
| TP53   | MED18  |
| ESR2   | MED18  |
| STAT6  | MED24  |
| RB1    | MED8   |
| STAT6  | MEF2A  |
| FOXA1  | MEF2D  |
| STAT6  | MEF2D  |
| STAT1  | MEFV   |
| STAT6  | MEGF11 |

|         |          |
|---------|----------|
| CTCF    | MEGF6    |
| ESR1    | MEGF6    |
| ESR2    | MEGF6    |
| MITF    | MEGF6    |
| SMARCA4 | MEGF6    |
| PRDM14  | MEIG1    |
| FOXA1   | MESP1    |
| STAT1   | MET      |
| RUNX1   | METTTL25 |
| PRDM14  | MEX3A    |
| RBL2    | MFAP2    |
| E2F4    | MFN2     |
| ETS1    | MFN2     |
| RB1     | MFN2     |
| RBL2    | MFN2     |
| SMARCA4 | MFN2     |
| SOX2    | MFNG     |
| TP53    | MFSD2A   |
| TRIM28  | MFSD2A   |
| STAT6   | MGRN1    |
| HNF1A   | MIA2     |
| EGR1    | MIA3     |
| E2F4    | MIB2     |
| HNF4A   | MIB2     |
| MITF    | MIB2     |
| RB1     | MIB2     |
| RBL2    | MIB2     |
| SMARCA4 | MIB2     |
| PRDM14  | MICAL3   |
| HIF1A   | MICALL2  |
| TFAP2C  | MICALL2  |

|        |           |
|--------|-----------|
| HIF1A  | MICU1     |
| PRDM14 | MIEF1     |
| RB1    | MIER1     |
| TP53   | MIER1     |
| EPAS1  | MIF       |
| CEBPA  | MIIP      |
| MITF   | MIIP      |
| RBL2   | MIIP      |
| E2F4   | MINOS1    |
| ESR1   | MINOS1    |
| ESR2   | MINOS1    |
| ETS1   | MINOS1    |
| RB1    | MINOS1    |
| RBL2   | MINOS1    |
| SP1    | MIP       |
| ESR1   | MIR101-1  |
| TAL1   | MIR101-1  |
| TFAP2C | MIR1204   |
| EPAS1  | MIR1204   |
| HIF1A  | MIR1204   |
| FOXA1  | MIR1208   |
| TFAP2C | MIR1208   |
| TFAP2C | MIR1244-3 |
| FOXA1  | MIR1275   |
| PRDM14 | MIR1275   |
| TFAP2C | MIR1275   |
| FOS    | MIR1306   |
| HIF1A  | MIR181A1  |
| RUNX1  | MIR181A1  |
| PRDM14 | MIR181C   |
| PRDM14 | MIR183    |

|         |             |
|---------|-------------|
| RBL2    | MIR200B     |
| SMARCA4 | MIR200B     |
| TRIM28  | MIR205      |
| TFAP2C  | MIR21       |
| EPAS1   | MIR21       |
| FOXA1   | MIR21       |
| FOXA1   | MIR21; VMP1 |
| EPAS1   | MIR210HG    |
| PRDM14  | MIR219A2    |
| EPAS1   | MIR30D      |
| HIF1A   | MIR30D      |
| ESR1    | MIR320B1    |
| CEBPA   | MIR34A      |
| CTCF    | MIR34A      |
| ESR2    | MIR34A      |
| GATA3   | MIR34A      |
| HNF4A   | MIR34A      |
| MITF    | MIR34A      |
| RBL2    | MIR34A      |
| TP53    | MIR34A      |
| EPAS1   | MIR365A     |
| FOS     | MIR4656     |
| FOS     | MIR4746     |
| FOS     | MIR4800     |
| STAT6   | MIR548H2    |
| EGR1    | MIR607      |
| IGF1R   | MIR607      |
| EPAS1   | MIR612      |
| FOXA1   | MIR633      |
| SRF     | MIR636      |
| EPAS1   | MIR656      |

|        |           |
|--------|-----------|
| E2F4   | MIR6727   |
| ETS1   | MIR6727   |
| E2F4   | MIR6732   |
| ESR1   | MIR6732   |
| ESR1   | MIR6734   |
| EPAS1  | MIR6785   |
| FOXA1  | MIR6785   |
| FOS    | MIR6791   |
| FOS    | MIRLET7A1 |
| PRDM14 | MIRLET7A2 |
| ZNF263 | MISP      |
| SOX10  | MITF      |
| PRDM1  | MKI67     |
| HIF1A  | MKL2      |
| EGR1   | MKLN1     |
| TAL1   | MKNK1     |
| ZNF263 | MKNK2     |
| HOXA5  | MLH1      |
| PRDM14 | MLLT6     |
| HNF4A  | MMEL1     |
| SRF    | MMP13     |
| TFAP2C | MMP17     |
| STAT1  | MMP25     |
| JUN    | MMP9      |
| NFKB1  | MMP9      |
| PRDM14 | MN1       |
| HIF1A  | MON1B     |
| CTCF   | MORN1     |
| E2F4   | MORN1     |
| ESR1   | MORN1     |
| ESR2   | MORN1     |

|         |         |
|---------|---------|
| ETS1    | MORN1   |
| RB1     | MORN1   |
| RBL2    | MORN1   |
| SMARCA4 | MORN1   |
| RUNX1   | MORN3   |
| TP53    | MOV10   |
| TAL1    | MPL     |
| FOS     | MPND    |
| RXRA    | MPO     |
| FOXA1   | MPP5    |
| FOS     | MPV17L2 |
| STAT1   | MRAS    |
| E2F4    | MRPL20  |
| ETS1    | MRPL20  |
| HNF4A   | MRPL20  |
| RB1     | MRPL20  |
| RBL2    | MRPL20  |
| SMARCA4 | MRPL20  |
| ZNF263  | MRPL55  |
| STAT6   | MRPS14  |
| RB1     | MRPS15  |
| RBL2    | MRPS15  |
| STAT1   | MRPS30  |
| E2F4    | MRT04   |
| ETS1    | MRT04   |
| RB1     | MRT04   |
| RBL2    | MRT04   |
| SPI1    | MS4A1   |
| STAT6   | MS4A5   |
| HIF1A   | MSANTD3 |
| FOS     | MSANTD4 |

|         |         |
|---------|---------|
| TP53    | MSH4    |
| RUNX1   | MSI2    |
| FOS     | MSMO1   |
| STAT1   | MSN     |
| SPI1    | MSR1    |
| Spi1    | MSR1    |
| HNF4A   | MST1    |
| MITF    | MST1L   |
| PRDM14  | MSX1    |
| CTCF    | MT1XP1  |
| PRDM14  | MTAP    |
| STAT1   | MTCH2   |
| EGR1    | MTDH    |
| RB1     | MTF1    |
| TP53    | MTF2    |
| E2F4    | MTFR1L  |
| RB1     | MTFR1L  |
| STAT6   | MTFR1L  |
| STAT6   | MTHFD1  |
| STAT1   | MTHFD2  |
| CEBPA   | MTHFR   |
| ETS1    | MTHFR   |
| GATA2   | MTHFR   |
| RB1     | MTHFR   |
| RBL2    | MTHFR   |
| SMARCA4 | MTHFR   |
| STAT1   | MTHFR   |
| IGF1R   | MTIF3   |
| FOS     | MTMR12  |
| FOS     | MTMR4   |
| ESR1    | MTMR9LP |



|         |          |
|---------|----------|
| RB1     | MTMR9LP  |
| RBL2    | MTMR9LP  |
| RUNX1   | MTND6P16 |
| RUNX1   | MTND6P7  |
| CEBPA   | MTOR     |
| CTCF    | MTOR     |
| ETS1    | MTOR     |
| FOS     | MTOR     |
| MITF    | MTOR     |
| RB1     | MTOR     |
| RBL2    | MTOR     |
| SMARCA4 | MTOR     |
| IGF1R   | MTRNR2L2 |
| IGF1R   | MTRNR2L8 |
| HNF4A   | MTTP     |
| STAT1   | MUC1     |
| SP1     | MUC2     |
| ZNF263  | MUC20    |
| EPAS1   | MUC5AC   |
| FRA2    | MUC5B    |
| JUND    | MUC5B    |
| SP1     | MUC5B    |
| SP3     | MUC5B    |
| ETS1    | MUL1     |
| RBL2    | MUL1     |
| STAT1   | MVP      |
| STAT1   | MX1      |
| EPAS1   | MX2      |
| FOXA1   | MX2      |
| TFAP2C  | MX2      |
| FOS     | MXD1     |

|        |        |
|--------|--------|
| FOS    | MXD4   |
| EPAS1  | MXI1   |
| FOS    | MXRA7  |
| BACH1  | MXRA8  |
| CTCF   | MXRA8  |
| ETS1   | MXRA8  |
| HNF4A  | MXRA8  |
| RBL2   | MXRA8  |
| E2F1   | MYB    |
| SPI1   | MYB    |
| Spi1   | MYB    |
| FOXA1  | MYBPC1 |
| E2F1   | MYC    |
| TFAP2C | MYC    |
| ZNF263 | MYC    |
| E2F4   | MYCBP  |
| STAT1  | MYCT1  |
| PRDM14 | MYF6   |
| SRF    | MYH6   |
| TEF    | MYH6   |
| TEF    | MYH7   |
| STAT1  | MYL3   |
| IGF1R  | MYO16  |
| STAT1  | MYO18A |
| RUNX1  | MYO18B |
| PRDM14 | MYO1D  |
| STAT6  | MYO1D  |
| ZNF263 | MYO1D  |
| STAT1  | MYO1E  |
| FOXA1  | MYO5C  |
| TFAP2C | MYO5C  |

|         |         |
|---------|---------|
| ESR1    | MYOF    |
| SRF     | MYOG    |
| ESR1    | MYOM3   |
| ESR2    | MYOM3   |
| GATA2   | MYOM3   |
| ESR1    | MYPN    |
| STAT1   | MYPN    |
| RB1     | MYSM1   |
| RBL2    | MYSM1   |
| STAT6   | MYSM1   |
| ZNF263  | MYT1L   |
| EGR1    | MYT1L   |
| SOX2    | N4BP2L2 |
| TFAP2C  | N4BP3   |
| EGR1    | NAA11   |
| HIF1A   | NAA30   |
| STAT6   | NAA60   |
| EGR1    | NAB1    |
| EGR1    | NAB2    |
| FOXA1   | NACA2   |
| CEBPA   | NADK    |
| E2F4    | NADK    |
| ESR1    | NADK    |
| ESR2    | NADK    |
| ETS1    | NADK    |
| HNF4A   | NADK    |
| MITF    | NADK    |
| RBL2    | NADK    |
| SMARCA4 | NADK    |
| ESR1    | NANOS1  |
| RB1     | NASP    |

|        |         |
|--------|---------|
| RBL2   | NASP    |
| EGR1   | NAT16   |
| HIF1A  | NAV1    |
| HIF1A  | NBAS    |
| GATA3  | NBL1    |
| RB1    | NBL1    |
| TRIM28 | NBPF16  |
| E2F4   | NBPF3   |
| ESR2   | NBPF3   |
| ETS1   | NBPF3   |
| GATA3  | NBPF3   |
| SP1    | NCAM1   |
| RBL2   | NCDN    |
| SPI1   | NCF1    |
| Spi1   | NCF1    |
| SPI1   | NCF4    |
| HIF1A  | NCKAP5  |
| STAT1  | NCKAP5  |
| ESR1   | NCMAP   |
| ESR2   | NCMAP   |
| GATA2  | NCMAP   |
| GATA3  | NCMAP   |
| TRIM28 | NCMAP   |
| STAT1  | NCOA1   |
| FOXA1  | NCOA3   |
| TFAP2C | NCOA3   |
| HIF1A  | NCOA7   |
| STAT1  | NCOA7   |
| ZNF263 | NCOA7   |
| EGR1   | NCOR1P1 |
| PRDM14 | NCOR1P1 |

|        |         |
|--------|---------|
| ZNF263 | NCOR1P1 |
| EPAS1  | NCOR2   |
| STAT6  | NCOR2   |
| TFAP2C | NCOR2   |
| HIF1A  | NDC1    |
| RBL2   | NDC1    |
| EPAS1  | NDRG1   |
| HIF1A  | NDRG1   |
| RUNX1  | NDST3   |
| FOXA1  | NDUFAF6 |
| HIF1A  | NDUFC1  |
| RBL2   | NDUFS5  |
| ZNF263 | NDUFS7  |
| EPAS1  | NEAT1   |
| PRDM14 | NEAT1   |
| STAT6  | NEAT1   |
| EPAS1  | NECAP1  |
| CTCF   | NECAP2  |
| E2F4   | NECAP2  |
| ETS1   | NECAP2  |
| PRDM14 | NECAP2  |
| RBL2   | NECAP2  |
| SOX2   | NEDD4   |
| TRIM28 | NEFHP1  |
| STAT1  | NEFL    |
| HIF1A  | NEGR1   |
| SOX2   | NEGR1   |
| TAL1   | NEGR1   |
| TP53   | NEGR1   |
| RUNX1  | NEIL2   |
| RUNX1  | NEIL3   |

|        |          |
|--------|----------|
| RUNX1  | NEK7     |
| STAT1  | NEK7     |
| TP53   | NENF     |
| NR2F1  | NES      |
| RXRA   | NES      |
| SPI1   | NF1      |
| SOX2   | NFATC2   |
| FOS    | NFATC2IP |
| STAT6  | NFATC3   |
| TAL1   | NFIA     |
| PRDM14 | NFIC     |
| EPAS1  | NFIL3    |
| STAT1  | NFKB2    |
| STAT1  | NFKBIZ   |
| FOS    | NFYC     |
| RB1    | NFYC     |
| RBL2   | NFYC     |
| STAT1  | NFYC     |
| TP53   | NFYC     |
| TP53   | NGF      |
| HIF1A  | NGLY1    |
| ESR1   | NHLH2    |
| TP53   | NHLH2    |
| TRIM28 | NID1     |
| GATA3  | NIPAL3   |
| RBL2   | NIPAL3   |
| TP53   | NIPAL3   |
| ESR1   | NKAIN1   |
| RB1    | NKAIN1   |
| TRIM28 | NKAIN1   |
| PRDM14 | NKRF     |

|        |        |
|--------|--------|
| FOS    | NLK    |
| STAT1  | NLRC5  |
| ESR1   | NMNAT1 |
| ESR2   | NMNAT1 |
| GATA2  | NMNAT1 |
| GATA3  | NMNAT1 |
| HIF1A  | NMNAT1 |
| RB1    | NMNAT1 |
| TRIM28 | NMNAT2 |
| STAT1  | NNMT   |
| ETS1   | NOC2L  |
| RBL2   | NOC2L  |
| STAT6  | NOC3L  |
| FOXA1  | NOL10  |
| STAT1  | NOL10  |
| E2F4   | NOL9   |
| RBL2   | NOL9   |
| HIF1A  | NOP58  |
| HIF1A  | NOS1   |
| IGF1R  | NOS1   |
| TP53   | NOS1AP |
| STAT1  | NOS2   |
| EGR1   | NOS3   |
| RUNX1  | NOSIP  |
| ZNF263 | NOTCH1 |
| TP53   | NOTCH2 |
| WT1    | NOV    |
| STAT1  | NPAS3  |
| CEBPA  | NPHP4  |
| CTCF   | NPHP4  |
| ETS1   | NPHP4  |

|         |          |
|---------|----------|
| GATA3   | NPHP4    |
| HNF4A   | NPHP4    |
| MITF    | NPHP4    |
| TP53    | NPL      |
| STAT6   | NPLOC4   |
| CEBPA   | NPPA-AS1 |
| MITF    | NPPA-AS1 |
| SMARCA4 | NPPA-AS1 |
| STAT6   | NPPA-AS1 |
| TAL1    | NPPA-AS1 |
| CTCF    | NPPB     |
| MITF    | NPPB     |
| BACH1   | NPRL3    |
| STAT6   | NPRL3    |
| SP1     | NPY      |
| ESR1    | NPY4R    |
| STAT1   | NPY4R    |
| BACH1   | NQO2     |
| NFE2L2  | NQO2     |
| STAT1   | NQO2     |
| ZNF263  | NQO2     |
| HNF4A   | NR0B2    |
| SRF     | NR0B2    |
| PRDM14  | NR2C2AP  |
| PRDM14  | NR2F2    |
| SPI1    | NR3C1    |
| SOX2    | NR3C2    |
| EPAS1   | NR4A3    |
| PDX1    | NR5A2    |
| STAT6   | NRBF2    |
| TFAP2C  | NRCAM    |



|        |        |
|--------|--------|
| RBL2   | NRD1   |
| TP53   | NRD1   |
| HIF1A  | NREP   |
| SOX2   | NRG1   |
| PRDM14 | NRIP1  |
| FOS    | NRL    |
| EPAS1  | NRN1   |
| HIF1A  | NRN1   |
| ESR1   | NRP1   |
| STAT1  | NRP1   |
| FOXA1  | NRXN3  |
| STAT6  | NSL1   |
| STAT6  | NSMCE1 |
| STAT1  | NSMCE2 |
| TP53   | NSUN4  |
| RB1    | NT5C1A |
| FOXA1  | NT5C1B |
| STAT1  | NTMT1  |
| TFAP2C | NTMT1  |
| STAT6  | NTN3   |
| ESR1   | NTNG1  |
| TP53   | NTNG1  |
| TP53   | NTPCR  |
| TCF4   | NTSR1  |
| TFAP2C | NTSR1  |
| STAT6  | NUAK2  |
| STAT1  | NUCB1  |
| FOXA1  | NUCB2  |
| E2F4   | NUDC   |
| GATA2  | NUDC   |
| RB1    | NUDC   |

|        |         |
|--------|---------|
| RBL2   | NUDC    |
| TFAP2C | NUDCD1  |
| HIF1A  | NUDT13  |
| FOXA1  | NUDT19  |
| STAT6  | NUDT5   |
| FOS    | NUMB    |
| HIF1A  | NUMB    |
| STAT1  | NUP107  |
| STAT6  | NUP133  |
| BACH1  | NUP153  |
| HIF1A  | NUP210  |
| STAT6  | NUP37   |
| SOX2   | NUPL1   |
| STAT1  | NUPR1   |
| HIF1A  | NVL     |
| PRDM14 | OAF     |
| STAT1  | OAS1    |
| ESR1   | OAT     |
| ESR1   | OBFC1   |
| TRIM28 | OBSCN   |
| FOS    | OIP5    |
| FOXA1  | OLFML3  |
| TRIM28 | OLFML3  |
| SOX2   | ONECUT1 |
| TFAP2C | ONECUT1 |
| EGR1   | ONECUT2 |
| ZNF263 | ONECUT3 |
| FOXA1  | OPA1    |
| HIF1A  | OR2K2   |
| IGF1R  | OR4A44P |
| IGF1R  | OR4A6P  |

|        |         |
|--------|---------|
| IGF1R  | OR4C12  |
| IGF1R  | OR4C50P |
| GATA3  | OR4F16  |
| TAL1   | OR4F16  |
| HIF1A  | OR7A10  |
| RB1    | ORC1    |
| RBL2   | ORC1    |
| FOS    | ORMDL2  |
| FOS    | OSBP    |
| FOXA1  | OSBPL1A |
| TFAP2C | OSBPL2  |
| RUNX1  | OSBPL3  |
| ESR1   | OSBPL9  |
| RBL2   | OSBPL9  |
| TP53   | OSBPL9  |
| E2F4   | OSCP1   |
| RBL2   | OSCP1   |
| STAT6  | OSGEP   |
| STAT1  | OSMR    |
| FOXA1  | OTOL1   |
| E2F4   | OTUD3   |
| ETS1   | OTUD3   |
| GATA3  | OTUD3   |
| RB1    | OTUD3   |
| RBL2   | OTUD3   |
| SOX2   | OTUD6B  |
| HIF1A  | OXS1R1  |
| NCOA2  | OXT     |
| ESR1   | OXT     |
| Esr2   | OXT     |
| NCOA3  | OXT     |

|        |          |
|--------|----------|
| NR2C2  | OXT      |
| NR2F1  | OXT      |
| NR5A1  | OXT      |
| TFAP2C | P2RX4    |
| EPAS1  | P2RY2    |
| RBL2   | P3H1     |
| EPAS1  | P3H2     |
| PRDM14 | P3H4     |
| EPAS1  | P4HA1    |
| EPAS1  | P4HA2    |
| FOS    | P4HB     |
| EPAS1  | PA2G4P4  |
| FOXA1  | PA2G4P4  |
| EGR1   | PABPC1P8 |
| PRDM14 | PABPC1P8 |
| ZNF263 | PABPC1P8 |
| RB1    | PABPC4   |
| RBL2   | PABPC4   |
| STAT6  | PABPC4   |
| FOS    | PABPN1   |
| ESR1   | PADI1    |
| ESR2   | PADI1    |
| ETS1   | PADI1    |
| GATA3  | PADI1    |
| MITF   | PADI1    |
| RBL2   | PADI1    |
| GATA2  | PADI2    |
| MITF   | PADI2    |
| ESR1   | PADI3    |
| GATA3  | PADI3    |
| MITF   | PADI3    |

|        |        |
|--------|--------|
| TAL1   | PADI3  |
| ESR1   | PADI4  |
| ESR2   | PADI4  |
| GATA3  | PADI4  |
| TP53   | PADI4  |
| GATA2  | PAFAH2 |
| RB1    | PAFAH2 |
| STAT6  | PAFAH2 |
| EPAS1  | PAG1   |
| HNF1A  | PAH    |
| HIF1A  | PAIP2  |
| HNF4A  | PAK7   |
| STAT6  | PALD1  |
| STAT1  | PALMD  |
| TP53   | PALMD  |
| RUNX1  | PAN3   |
| STAT1  | PANK3  |
| E2F4   | PANK4  |
| ETS1   | PANK4  |
| RB1    | PANK4  |
| RBL2   | PANK4  |
| HIF1A  | PAPPA2 |
| ESR1   | PAPSS2 |
| RB1    | PAQR7  |
| STAT6  | PARD3  |
| FOXA1  | PARD6B |
| TFAP2C | PARD6B |
| CEBPA  | PARK7  |
| CTCF   | PARK7  |
| HNF4A  | PARK7  |
| RB1    | PARK7  |

|         |          |
|---------|----------|
| RBL2    | PARK7    |
| E2F4    | PARK7    |
| ETS1    | PARK7    |
| SMARCA4 | PARK7    |
| IGF1R   | PARN     |
| ZNF263  | PARN     |
| STAT6   | PARP1    |
| TRIM28  | PARP1    |
| RB1     | PARS2    |
| RBL2    | PARS2    |
| STAT1   | PARVA    |
| RUNX1   | PARVB    |
| ETS1    | PAX7     |
| PRDM14  | PAX7     |
| RB1     | PAX7     |
| STAT6   | PBLD     |
| STAT1   | PBX3     |
| EGR1    | PCBD2    |
| HIF1A   | PCBP1    |
| SOX2    | PCBP2P3  |
| ZNF263  | PCBP3    |
| SOX2    | PCDH10   |
| BACH1   | PCDH9    |
| PRDM14  | PCDH9    |
| STAT1   | PCID2    |
| RXRA    | PCK1     |
| SOX2    | PCLO     |
| HIF1A   | PCMTD1   |
| ZNF263  | PCMTD1P1 |
| EGR1    | PCMTD2   |
| RFX1    | PCNA     |

|        |         |
|--------|---------|
| TP53   | PCNXL2  |
| EPAS1  | PCOLCE2 |
| SOX2   | PCSK6   |
| ESR1   | PCSK9   |
| ZNF263 | PCSK9   |
| EPAS1  | PCYT1B  |
| PRDM14 | PDE11A  |
| HIF1A  | PDE12   |
| STAT1  | PDE1A   |
| HIF1A  | PDE2A   |
| EGR1   | PDE3A   |
| IGF1R  | PDE3A   |
| ZNF263 | PDE3A   |
| RUNX1  | PDE3B   |
| IGF1R  | PDE4B   |
| TAL1   | PDE4B   |
| TP53   | PDE4B   |
| HIF1A  | PDE4D   |
| SOX2   | PDE4D   |
| STAT1  | PDE4D   |
| TFAP2C | PDE4DIP |
| HIF1A  | PDE5A   |
| EPAS1  | PDGFB   |
| PRDM14 | PDGFB   |
| E2F4   | PDIK1L  |
| GATA2  | PDIK1L  |
| STAT1  | PDIK1L  |
| EPAS1  | PDK1    |
| SOX2   | PDK1    |
| EPAS1  | PDK3    |
| HIF1A  | PDLIM2  |

|         |          |
|---------|----------|
| EPAS1   | PDLIM2   |
| STAT1   | PDP1     |
| GATA3   | PDPN     |
| KLF11   | PDX1     |
| ZNF263  | PDXK     |
| FOS     | PDXP     |
| TAL1    | PDZK1IP1 |
| IGF1R   | PDZRN4   |
| ZNF263  | PEAR1    |
| STAT6   | PEBP1    |
| HIF1A   | PEBP4    |
| RB1     | PEF1     |
| RBL2    | PEF1     |
| RUNX1   | PELI2    |
| FOS     | PENK     |
| TBP     | PENK     |
| TFAP2A  | PENK     |
| TFAP4   | PENK     |
| CTCF    | PER3     |
| ESR2    | PER3     |
| MITF    | PER3     |
| SMARCA4 | PER3     |
| CEBPA   | PERM1    |
| CTCF    | PERM1    |
| ESR2    | PERM1    |
| MITF    | PERM1    |
| E2F4    | PEX10    |
| ESR2    | PEX10    |
| ETS1    | PEX10    |
| HNF4A   | PEX10    |
| RB1     | PEX10    |



|         |        |
|---------|--------|
| RBL2    | PEX10  |
| TP53    | PEX11B |
| CEBPA   | PEX14  |
| CTCF    | PEX14  |
| E2F4    | PEX14  |
| ESR1    | PEX14  |
| ESR2    | PEX14  |
| ETS1    | PEX14  |
| GATA2   | PEX14  |
| GATA3   | PEX14  |
| HNF4A   | PEX14  |
| MITF    | PEX14  |
| RB1     | PEX14  |
| RBL2    | PEX14  |
| SMARCA4 | PEX14  |
| STAT6   | PEX14  |
| TAL1    | PEX14  |
| STAT6   | PEX19  |
| HIF1A   | PEX3   |
| FOXA1   | PFDN4  |
| EPAS1   | PFKFB3 |
| ESR1    | PFKFB3 |
| HIF1A   | PFKFB3 |
| STAT6   | PFKFB3 |
| HIF1A   | PFKFB4 |
| EPAS1   | PFKP   |
| EPAS1   | PGAM1  |
| SOX2    | PGAP2  |
| TP53    | PGCP1  |
| CEBPA   | PGD    |
| E2F4    | PGD    |

|         |         |
|---------|---------|
| ESR2    | PGD     |
| ETS1    | PGD     |
| RB1     | PGD     |
| RBL2    | PGD     |
| SMARCA4 | PGD     |
| FOXA1   | PGF     |
| EPAS1   | PGK1    |
| TRIM28  | PGM1    |
| FOS     | PGP     |
| HOXA5   | PGR     |
| FOXA1   | PGS1    |
| GATA2   | PHACTR4 |
| RB1     | PHACTR4 |
| TAL1    | PHACTR4 |
| TP53    | PHACTR4 |
| SOX2    | PHB     |
| STAT6   | PHB     |
| TAL1    | PHBP3   |
| TP53    | PHBP3   |
| GATA2   | PHC2    |
| PRDM14  | PHC2    |
| RB1     | PHC2    |
| TAL1    | PHC2    |
| ESR2    | PHF13   |
| GATA3   | PHF13   |
| MITF    | PHF13   |
| RB1     | PHF13   |
| RBL2    | PHF13   |
| EGR1    | PHF2    |
| EPAS1   | PHF21A  |
| STAT6   | PHF21A  |

|         |         |
|---------|---------|
| RUNX1   | PHKA1P1 |
| SOX2    | PHKA1P1 |
| STAT6   | PHLDA1  |
| BACH1   | PHLDA2  |
| TP53    | PHLDA3  |
| EGR1    | PHLDB1  |
| Phox2b  | PHOX2A  |
| PHOX2B  | PHOX2B  |
| FOS     | PHPT1   |
| HIF1A   | PHPT1   |
| EGR1    | PI4KA   |
| EGR1    | PID1    |
| ZNF263  | PID1    |
| TFAP2C  | PIEZO1  |
| PRDM14  | PIEZO2  |
| E2F4    | PIGV    |
| RBL2    | PIGV    |
| STAT6   | PIGW    |
| EGR1    | PIGX    |
| FOXA1   | PIK3AP1 |
| TFAP2C  | PIK3C2B |
| BACH1   | PIK3CD  |
| CEBPA   | PIK3CD  |
| CTCF    | PIK3CD  |
| E2F4    | PIK3CD  |
| ETS1    | PIK3CD  |
| HNF4A   | PIK3CD  |
| MITF    | PIK3CD  |
| RB1     | PIK3CD  |
| RBL2    | PIK3CD  |
| SMARCA4 | PIK3CD  |

|        |            |
|--------|------------|
| ETS1   | PIK3CD-AS1 |
| PRDM14 | PIK3R1     |
| RBL2   | PIK3R3     |
| EPAS1  | PIM1       |
| E2F4   | PINK1      |
| ZNF263 | PIP5K1C    |
| E2F4   | PITHD1     |
| RBL2   | PITHD1     |
| STAT1  | PITRM1     |
| RUNX1  | PIWIL1     |
| HIF1A  | PJA2       |
| HIF1A  | PKD2L1     |
| FOXA1  | PKIA       |
| HIF1A  | PKIA       |
| EPAS1  | PKM        |
| TP53   | PKN2       |
| TRIM28 | PKN2       |
| EPAS1  | PKP2       |
| ZEB1   | PKP3       |
| EPAS1  | PLA2G15    |
| GATA2  | PLA2G2A    |
| GATA3  | PLA2G2A    |
| RBL2   | PLA2G2A    |
| GATA2  | PLA2G2D    |
| TP53   | PLA2G2F    |
| STAT1  | PLA2G4A    |
| TRIM28 | PLA2G5     |
| CREB1  | PLAT       |
| RXRA   | PLAT       |
| AP2B   | PLAUR      |
| FOS    | PLAUR      |

|        |          |
|--------|----------|
| FOSL1  | PLAUR    |
| JUN    | PLAUR    |
| JUNB   | PLAUR    |
| JUND   | PLAUR    |
| NFKB1  | PLAUR    |
| SP1    | PLAUR    |
| TFAP2A | PLAUR    |
| TFAP2C | PLAUR    |
| EPAS1  | PLB1     |
| RUNX1  | PLCE1    |
| CEBPA  | PLCH2    |
| EPAS1  | PLCH2    |
| HNF4A  | PLCH2    |
| RUNX1  | PLCL1    |
| RUNX1  | PLCL2    |
| STAT6  | PLD2     |
| TP53   | PLD5     |
| EPAS1  | PLEKHA2  |
| STAT1  | PLEKHA2  |
| STAT1  | PLEKHA6  |
| TFAP2C | PLEKHA6  |
| TRIM28 | PLEKHA6  |
| HIF1A  | PLEKHA8  |
| STAT1  | PLEKHG4B |
| CTCF   | PLEKHG5  |
| ESR1   | PLEKHG5  |
| ESR2   | PLEKHG5  |
| ETS1   | PLEKHG5  |
| GATA2  | PLEKHG5  |
| HNF4A  | PLEKHG5  |
| MITF   | PLEKHG5  |

|         |         |
|---------|---------|
| RBL2    | PLEKHG5 |
| SMARCA4 | PLEKHG5 |
| HIF1A   | PLEKHG6 |
| MITF    | PLEKHM2 |
| RBL2    | PLEKHM2 |
| SMARCA4 | PLEKHM2 |
| FOXA1   | PLK2    |
| STAT1   | PLK2    |
| TP53    | PLK3    |
| CEBPA   | PLOD1   |
| E2F4    | PLOD1   |
| EPAS1   | PLOD1   |
| GATA3   | PLOD1   |
| MITF    | PLOD1   |
| RBL2    | PLOD1   |
| SMARCA4 | PLOD1   |
| EPAS1   | PLOD2   |
| HIF1A   | PLOD2   |
| STAT1   | PLSCR1  |
| STAT6   | PLXNA2  |
| TP53    | PLXNA2  |
| STAT1   | PLXNB1  |
| STAT6   | PLXNC1  |
| RUNX1   | PLXND1  |
| FOS     | PMEL    |
| RUNX1   | PMEPA1  |
| EGR1    | PMF1    |
| IGF1R   | PMF1    |
| PRDM14  | PMF1    |
| SRF     | PMF1    |
| STAT6   | PMF1    |

|        |         |
|--------|---------|
| ZNF263 | PMF1    |
| EGR1   | PMPCA   |
| TRIM28 | PMVK    |
| HIF1A  | PNISR   |
| STAT6  | PNN     |
| ZNF263 | PNPLA7  |
| HIF1A  | PNPLA8  |
| EPAS1  | PNPO    |
| EPAS1  | PNRC1   |
| HIF1A  | PNRC1   |
| E2F4   | PNRC2   |
| RB1    | PNRC2   |
| RBL2   | PNRC2   |
| EPAS1  | PODXL   |
| TP53   | POGZ    |
| EPAS1  | POLD2P1 |
| EGR1   | POLG    |
| EGR1   | POLR1C  |
| HIF1A  | POLR2H  |
| RB1    | POMGNT1 |
| ZNF263 | POMT1   |
| STAT1  | POPDC2  |
| HIF1A  | POU2F1  |
| STAT1  | POU2F3  |
| E2F4   | POU3F1  |
| ESR1   | POU3F1  |
| RB1    | POU3F1  |
| RBL2   | POU3F1  |
| TAL1   | POU3F1  |
| TRIM28 | POU3F1  |
| STAT6  | POU4F1  |

|        |           |
|--------|-----------|
| Sox2   | POU5F1    |
| STAT1  | POU5F1B   |
| ESR1   | PPA1      |
| ESR1   | PPAP2B    |
| STAT1  | PPAP2B    |
| TP53   | PPAP2B    |
| FOXA1  | PPAPDC1A  |
| HNF4A  | PPARA     |
| CEBPA  | PPARG     |
| SPI1   | PPBP      |
| STAT6  | PPCDC     |
| RB1    | PPCS      |
| RBL2   | PPCS      |
| RUNX1  | PPFIBP1   |
| PRDM14 | PPHLN1    |
| EPAS1  | PPIAP3    |
| HIF1A  | PPID      |
| PRDM14 | PPIE      |
| RB1    | PPIE      |
| ESR1   | PPIF      |
| RBL2   | PPIH      |
| RUNX1  | PPM1A     |
| FOS    | PPM1B     |
| STAT6  | PPM1D     |
| TFAP2C | PPM1D     |
| SOX2   | PPM1E     |
| PRDM14 | PPM1H     |
| ESR1   | PPM1J     |
| TP53   | PPM1J     |
| EPAS1  | PPME1     |
| GATA3  | PPP1R11P1 |



|        |           |
|--------|-----------|
| TAL1   | PPP1R11P1 |
| ZNF263 | PPP1R14C  |
| ZNF263 | PPP1R18   |
| PRDM14 | PPP1R3B   |
| EPAS1  | PPP1R3C   |
| HIF1A  | PPP1R3C   |
| STAT1  | PPP1R3C   |
| FOS    | PPP1R3F   |
| E2F4   | PPP1R8    |
| RB1    | PPP1R8    |
| RBL2   | PPP1R8    |
| HIF1A  | PPP2R5E   |
| FOS    | PPP6R3    |
| HIF1A  | PPP6R3    |
| ESR1   | PPRC1     |
| STAT6  | PPT1      |
| ESR2   | PQLC2     |
| RBL2   | PQLC2     |
| ZNF263 | PRAME     |
| CTCF   | PRAMEF1   |
| CTCF   | PRAMEF14  |
| TRIM28 | PRAMEF20  |
| TRIM28 | PRAMEF21  |
| HIF1A  | PRDM1     |
| PRDM14 | PRDM14    |
| CEBPA  | PRDM16    |
| CTCF   | PRDM16    |
| E2F4   | PRDM16    |
| ESR1   | PRDM16    |
| ESR2   | PRDM16    |
| GATA3  | PRDM16    |

|         |          |
|---------|----------|
| HNF4A   | PRDM16   |
| MITF    | PRDM16   |
| RB1     | PRDM16   |
| RBL2    | PRDM16   |
| SMARCA4 | PRDM16   |
| TRIM28  | PRDM16   |
| ZNF263  | PRDM16   |
| CTCF    | PRDM2    |
| E2F4    | PRDM2    |
| ETS1    | PRDM2    |
| GATA2   | PRDM2    |
| GATA3   | PRDM2    |
| RBL2    | PRDM2    |
| SMARCA4 | PRDM2    |
| TAL1    | PRDM2    |
| PRDM14  | PRDM8    |
| FOXA1   | PRDM9    |
| RB1     | PRDX1    |
| RBL2    | PRDX1    |
| TP53    | PRDX1    |
| EPAS1   | PRDX2    |
| STAT1   | PRDX2    |
| MYC     | PRDX3    |
| HIF1A   | PRELID2  |
| TFAP2C  | PREX1    |
| RUNX1   | PREX2    |
| STAT6   | PRICKLE1 |
| EPAS1   | PRICKLE2 |
| FOXA1   | PRICKLE2 |
| TFAP2C  | PRICKLE2 |
| FOXA1   | PRIM2    |

|         |         |
|---------|---------|
| HIF1A   | PRKAB2  |
| TRIM28  | PRKAB2  |
| FOS     | PRKACA  |
| TAL1    | PRKACB  |
| TFAP2C  | PRKAG2  |
| RUNX1   | PRKCA   |
| STAT6   | PRKCH   |
| HIF1A   | PRKCQ   |
| RUNX1   | PRKCQ   |
| CEBPA   | PRKCZ   |
| CTCF    | PRKCZ   |
| E2F4    | PRKCZ   |
| ETS1    | PRKCZ   |
| HNF4A   | PRKCZ   |
| MITF    | PRKCZ   |
| RBL2    | PRKCZ   |
| SMARCA4 | PRKCZ   |
| SRF     | PRL     |
| FOXA1   | PRLR    |
| FOS     | PRMT1   |
| ESR1    | PRMT6   |
| TP53    | PRMT6   |
| FOXM1   | PROC    |
| HNF1A   | PROC    |
| NFIC    | PROC    |
| SP1     | PROC    |
| EGR1    | PROSER2 |
| ESR1    | PROSER2 |
| ZNF263  | PROSER2 |
| STAT1   | PROX1   |
| TRIM28  | PROX1   |

|        |            |
|--------|------------|
| FOS    | PRPF40A    |
| FOS    | PRR11      |
| ZNF263 | PRR34      |
| ZNF263 | PRR5       |
| RUNX1  | PRR5L      |
| FOS    | PRRC2B     |
| ZNF263 | PRSS38     |
| SPI1   | PRTN3      |
| EGR1   | PRUNE2     |
| ZNF263 | PRUNE2     |
| BACH1  | PSAP       |
| ESR1   | PSAP       |
| STAT6  | PSAP       |
| EPAS1  | PSD3       |
| SRF    | pseudogene |
| E2F4   | PSMB2      |
| STAT1  | PSMB9      |
| TP53   | PSMC1P12   |
| ZNF263 | PSMC3      |
| STAT1  | PSMD1      |
| EGR1   | PSMD13     |
| GATA2  | PTAFR      |
| RUNX1  | PTAFR      |
| TRIM28 | PTBP2      |
| ESR1   | PTCH2      |
| RB1    | PTCH2      |
| CTCF   | PTCHD2     |
| E2F4   | PTCHD2     |
| ESR1   | PTCHD2     |
| ESR2   | PTCHD2     |
| ETS1   | PTCHD2     |

|        |        |
|--------|--------|
| RBL2   | PTCHD2 |
| STAT6  | PTCHD2 |
| TP53   | PTCHD2 |
| ESR1   | PTGER3 |
| TAL1   | PTGER3 |
| ESR1   | PTGFRN |
| TP53   | PTGFRN |
| HIF1A  | PTGIS  |
| STAT6  | PTGR2  |
| STAT1  | PTGS1  |
| NFATC2 | PTGS2  |
| NFATC1 | PTGS2  |
| MAZ    | PTH1R  |
| SOX2   | PTHLH  |
| FOXA1  | PTMAP5 |
| FOXA1  | PTMAP6 |
| HOXA5  | PTN    |
| E2F4   | PTP4A2 |
| ESR1   | PTP4A2 |
| GATA2  | PTP4A2 |
| RBL2   | PTP4A2 |
| STAT6  | PTPMT1 |
| TP53   | PTPN14 |
| STAT1  | PTPN3  |
| ZNF263 | PTPN4  |
| HIF1A  | PTPRC  |
| ESR1   | PTPRE  |
| STAT6  | PTPRE  |
| ESR1   | PTPRF  |
| TP53   | PTPRF  |
| FOXA1  | PTPRG  |

|        |         |
|--------|---------|
| TFAP2C | PTPRG   |
| RUNX1  | PTPRK   |
| EPAS1  | PTPRN2  |
| PRDM14 | PTPRN2  |
| E2F4   | PTPRU   |
| GATA2  | PTPRU   |
| PRDM14 | PTPRU   |
| RB1    | PTPRU   |
| RBL2   | PTPRU   |
| TP53   | PTPRU   |
| TRIM28 | PTPRU   |
| EGR1   | PTRF    |
| E2F4   | PUM1    |
| RB1    | PUM1    |
| RBL2   | PUM1    |
| E2F4   | PUSL1   |
| RB1    | PUSL1   |
| RBL2   | PUSL1   |
| RUNX1  | PVALB   |
| TP53   | PVRL4   |
| EPAS1  | PVT1    |
| HIF1A  | PVT1    |
| TFAP2C | PVT1    |
| FOS    | PWWP2A  |
| SOX2   | PXDC1   |
| EPAS1  | PXDN    |
| HIF1A  | PXDN    |
| FOS    | PXMP4   |
| TP53   | PYHIN1  |
| ESR1   | PYROXD2 |
| EPAS1  | QKI     |

|        |          |
|--------|----------|
| EGR1   | QSER1    |
| EPAS1  | QSOX1    |
| ZNF263 | R3HDM4   |
| FOS    | RAB11B   |
| HIF1A  | RAB17    |
| STAT1  | RAB27A   |
| FOXA1  | RAB27B   |
| ZNF263 | RAB36    |
| SOX2   | RAB37    |
| FOS    | RAB3A    |
| ESR1   | RAB3B    |
| TRIM28 | RAB3B    |
| STAT1  | RAB3GAP1 |
| TP53   | RAB3GAP2 |
| FOS    | RAB40C   |
| HIF1A  | RABGAP1  |
| STAT1  | RAD1     |
| HIF1A  | RAD23B   |
| EPAS1  | RAD51B   |
| FOXA1  | RAD51B   |
| HIF1A  | RAD51B   |
| STAT1  | RAD51B   |
| RB1    | RAD54L   |
| RBL2   | RAD54L   |
| PRDM14 | RAI1     |
| ZNF263 | RALA     |
| TFAP2C | RALB     |
| RUNX1  | RALGPS1  |
| EPAS1  | RALGPS2  |
| HIF1A  | RANP6    |
| EGR1   | RAP1A    |

|        |            |
|--------|------------|
| STAT6  | RAP1A      |
| TRIM28 | RAP1A      |
| ESR1   | RAP1GAP    |
| ESR2   | RAP1GAP    |
| ETS1   | RAP1GAP    |
| GATA3  | RAP1GAP    |
| RB1    | RAP1GAP    |
| HIF1A  | RAP2B      |
| PRDM14 | RARA       |
| RXRA   | RARA       |
| RXRA   | RARB       |
| SRF    | RARB       |
| RXRA   | RARG       |
| TFAP2C | RARG       |
| RXRA   | RARRES3    |
| TP53   | RASAL2     |
| FOXA1  | RASEF      |
| PRDM14 | RASGRF1    |
| HIF1A  | RASSF1     |
| EPAS1  | RASSF3     |
| FOXA1  | RASSF3     |
| ESR1   | RASSF4     |
| TAL1   | RAVER2     |
| SP1    | RB1        |
| PRDM14 | RB1CC1     |
| SP1    | RB1CC1     |
| TP53   | RB1CC1     |
| TP53   | RBBP5      |
| HIF1A  | RBFOX2     |
| FOS    | RBM14-RBM4 |
| FOS    | RBM15      |



|        |        |
|--------|--------|
| STAT6  | RBM15  |
| ESR1   | RBM20  |
| STAT6  | RBM20  |
| PRDM14 | RBM24  |
| FOS    | RBM27  |
| FOS    | RBM38  |
| HIF1A  | RBM8A  |
| NFIA   | RBP1   |
| RXRA   | RBP1   |
| ESR2   | RBP7   |
| PRDM14 | RC3H1  |
| GATA3  | RCAN3  |
| RUNX1  | RCBTB2 |
| E2F4   | RCC1   |
| ESR2   | RCC1   |
| RB1    | RCC1   |
| RBL2   | RCC1   |
| TRIM28 | RCC1   |
| E2F4   | RCC2   |
| ETS1   | RCC2   |
| MITF   | RCC2   |
| RB1    | RCC2   |
| TP53   | RCC2   |
| EGR1   | RECQL4 |
| ESR1   | REEP3  |
| HIF1A  | RELL1  |
| TRIM28 | REN    |
| HNF4A  | RER1   |
| RBL2   | RER1   |
| CEBPA  | RERE   |
| CTCF   | RERE   |

|         |       |
|---------|-------|
| E2F4    | RERE  |
| ESR1    | RERE  |
| ESR2    | RERE  |
| ETS1    | RERE  |
| GATA2   | RERE  |
| GATA3   | RERE  |
| HIF1A   | RERE  |
| HNF4A   | RERE  |
| MITF    | RERE  |
| RB1     | RERE  |
| RBL2    | RERE  |
| SMARCA4 | RERE  |
| TAL1    | RERE  |
| ESR1    | RET   |
| SOX10   | RET   |
| STAT6   | RFC3  |
| FOXA1   | RFTN2 |
| FOS     | RFWD3 |
| FOS     | RFX1  |
| EGR1    | RFX2  |
| PRDM14  | RFX4  |
| ZNF263  | RGR   |
| RUNX1   | RGS1  |
| ESR1    | RGS10 |
| ZNF263  | RGS10 |
| ZNF263  | RGS14 |
| RUNX1   | RGS16 |
| TP53    | RGS18 |
| STAT1   | RGS4  |
| HIF1A   | RGS6  |
| HIF1A   | RGS7  |

|        |           |
|--------|-----------|
| TP53   | RGS7      |
| TRIM28 | RGS7      |
| TFAP2C | RGS8      |
| TP53   | RGS8      |
| ZNF263 | RGS9      |
| BACH1  | RHBDD3    |
| E2F4   | RHCE      |
| FOS    | RHCE      |
| RB1    | RHCE      |
| SRF    | RHO       |
| ESR1   | RHOBTB1   |
| HIF1A  | RHOBTB3   |
| ZNF263 | RHOC      |
| TRIM28 | RHOU      |
| TFAP2C | RHPN1     |
| STAT6  | RIC8B     |
| STAT6  | RIMKLB    |
| HIF1A  | RIOK1     |
| STAT1  | RIT1      |
| EPAS1  | RLF       |
| HIF1A  | RLF       |
| RBL2   | RLF       |
| STAT6  | RMI2      |
| TFAP2C | RMI2      |
| STAT1  | RN7SKP133 |
| BACH1  | RN7SKP17  |
| STAT6  | RN7SKP17  |
| STAT6  | RN7SKP2   |
| PRDM14 | RN7SKP206 |
| RUNX1  | RN7SKP206 |
| EPAS1  | RN7SKP211 |

|        |           |
|--------|-----------|
| HIF1A  | RN7SKP224 |
| RUNX1  | RN7SKP240 |
| STAT1  | RN7SKP247 |
| TAL1   | RN7SKP247 |
| FOXA1  | RN7SKP289 |
| TFAP2C | RN7SKP289 |
| SOX2   | RN7SKP298 |
| HIF1A  | RN7SKP43  |
| SOX2   | RN7SKP73  |
| RUNX1  | RN7SKP79  |
| ESR1   | RN7SKP91  |
| RB1    | RN7SKP91  |
| RBL2   | RN7SKP91  |
| STAT6  | RNA5-8SP2 |
| IGF1R  | RNA5-8SP2 |
| EGR1   | RNA5-8SP4 |
| ZNF263 | RNA5-8SP6 |
| RUNX1  | RNA5SP127 |
| STAT1  | RNA5SP146 |
| TFAP2C | RNA5SP146 |
| TFAP2C | RNA5SP147 |
| FOXA1  | RNA5SP150 |
| FOXA1  | RNA5SP150 |
| FOXA1  | RNA5SP189 |
| FOXA1  | RNA5SP276 |
| EPAS1  | RNA5SP299 |
| FOXA1  | RNA5SP299 |
| RUNX1  | RNA5SP348 |
| EGR1   | RNA5SP357 |
| IGF1R  | RNA5SP357 |
| IGF1R  | RNA5SP358 |

|         |           |
|---------|-----------|
| STAT6   | RNA5SP358 |
| HIF1A   | RNA5SP360 |
| CEBPA   | RNA5SP40  |
| CTCF    | RNA5SP40  |
| ESR1    | RNA5SP40  |
| ESR2    | RNA5SP40  |
| ETS1    | RNA5SP40  |
| GATA2   | RNA5SP40  |
| GATA3   | RNA5SP40  |
| HNF4A   | RNA5SP40  |
| MITF    | RNA5SP40  |
| RB1     | RNA5SP40  |
| RBL2    | RNA5SP40  |
| SMARCA4 | RNA5SP40  |
| TAL1    | RNA5SP40  |
| RUNX1   | RNA5SP400 |
| HIF1A   | RNA5SP401 |
| SOX2    | RNA5SP401 |
| EPAS1   | RNA5SP444 |
| SOX2    | RNA5SP52  |
| TAL1    | RNA5SP52  |
| TP53    | RNA5SP66  |
| STAT6   | RNA5SP69  |
| EPAS1   | RNA5SP84  |
| TFAP2C  | RNA5SP84  |
| HIF1A   | RNase_MRP |
| SPI1    | RNASE2    |
| STAT6   | RNASEH2C  |
| RBL2    | RNF11     |
| HIF1A   | RNF145    |
| HIF1A   | RNF181    |

|         |           |
|---------|-----------|
| HIF1A   | RNF187    |
| EPAS1   | RNF19A    |
| E2F4    | RNF19B    |
| GATA2   | RNF19B    |
| RB1     | RNF19B    |
| ESR1    | RNF207    |
| HNF4A   | RNF207    |
| MITF    | RNF207    |
| RBL2    | RNF207    |
| EGR1    | RNF212    |
| RBL2    | RNF220    |
| TAL1    | RNF220    |
| ESR1    | RNF223    |
| ESR2    | RNF223    |
| GATA3   | RNF223    |
| HNF4A   | RNF223    |
| SMARCA4 | RNF223    |
| STAT1   | RNF31     |
| FOS     | RNF5      |
| TFAP2C  | RNFT1     |
| ESR1    | RNLS      |
| STAT1   | RNLS      |
| STAT6   | RNLS      |
| TRIM28  | RNU1      |
| GATA3   | RNU1      |
| ETS1    | RNU1      |
| TAL1    | RNU1      |
| E2F4    | RNU11     |
| CTCF    | RNU1-1    |
| IGF1R   | RNU1-104P |
| STAT6   | RNU1-104P |

|         |           |
|---------|-----------|
| ZNF263  | RNU1-104P |
| EGR1    | RNU1-104P |
| STAT1   | RNU1-106P |
| ESR1    | RNU1-130P |
| TP53    | RNU1-130P |
| CTCF    | RNU1-2    |
| CTCF    | RNU1-27P  |
| CTCF    | RNU1-28P  |
| CTCF    | RNU1-3    |
| RUNX1   | RNU1-35P  |
| CTCF    | RNU1-4    |
| CEBPA   | RNU1-7P   |
| EPAS1   | RNU1-7P   |
| ESR2    | RNU1-7P   |
| GATA2   | RNU1-7P   |
| GATA3   | RNU1-7P   |
| HNF4A   | RNU1-7P   |
| MITF    | RNU1-7P   |
| RB1     | RNU1-7P   |
| RBL2    | RNU1-7P   |
| SMARCA4 | RNU1-7P   |
| TAL1    | RNU1-7P   |
| HNF4A   | RNU1-7P   |
| TP53    | RNU1-92P  |
| FOXA1   | RNU2-14P  |
| TFAP2C  | RNU2-3P   |
| HIF1A   | RNU2-8P   |
| GATA2   | RNU4-28P  |
| FOXA1   | RNU4-37P  |
| EPAS1   | RNU4-76P  |
| BACH1   | RNU4-90P  |

|         |            |
|---------|------------|
| EPAS1   | RNU4-90P   |
| HIF1A   | RNU4-90P   |
| TAL1    | RNU4ATAC4P |
| ESR1    | RNU4ATAC6P |
| TAL1    | RNU5D-1    |
| CTCF    | RNU5E-1    |
| ETS1    | RNU5E-1    |
| RB1     | RNU5E-1    |
| RBL2    | RNU5E-1    |
| RB1     | RNU5E-4P   |
| RBL2    | RNU5E-4P   |
| SMARCA4 | RNU5E-4P   |
| RBL2    | RNU5E-4P   |
| TAL1    | RNU5F-1    |
| HIF1A   | RNU6       |
| STAT1   | RNU6       |
| STAT1   | RNU6-1010P |
| SOX2    | RNU6-1012P |
| TP53    | RNU6-1031P |
| STAT1   | RNU6-1032P |
| FOXA1   | RNU6-1051P |
| HIF1A   | RNU6-1066P |
| GATA3   | RNU6-1072P |
| BACH1   | RNU6-1103P |
| SOX2    | RNU6-1186P |
| CEBPA   | RNU6-1199P |
| ETS1    | RNU6-1199P |
| RB1     | RNU6-1199P |
| RBL2    | RNU6-1199P |
| PRDM14  | RNU6-1204P |
| TRIM28  | RNU6-1211P |



|        |            |
|--------|------------|
| SOX2   | RNU6-1246P |
| STAT6  | RNU6-1246P |
| STAT6  | RNU6-1262P |
| TAL1   | RNU6-1281P |
| STAT1  | RNU6-13P   |
| TRIM28 | RNU6-152P  |
| ESR1   | RNU6-163P  |
| TAL1   | RNU6-176P  |
| STAT6  | RNU6-189P  |
| EGR1   | RNU6-231P  |
| IGF1R  | RNU6-231P  |
| STAT1  | RNU6-242P  |
| TRIM28 | RNU6-290P  |
| CEBPA  | RNU6-304P  |
| TRIM28 | RNU6-304P  |
| EGR1   | RNU6-309P  |
| FOXA1  | RNU6-334P  |
| FOXA1  | RNU6-400P  |
| TRIM28 | RNU6-403P  |
| STAT1  | RNU6-406P  |
| RB1    | RNU6-40P   |
| TAL1   | RNU6-40P   |
| TP53   | RNU6-40P   |
| PRDM14 | RNU6-416P  |
| EGR1   | RNU6-417P  |
| PRDM14 | RNU6-417P  |
| ZNF263 | RNU6-417P  |
| HIF1A  | RNU6-428P  |
| FOXA1  | RNU6-442P  |
| RUNX1  | RNU6-442P  |
| SOX2   | RNU6-443P  |

|        |           |
|--------|-----------|
| FOXA1  | RNU6-449P |
| FOXA1  | RNU6-450P |
| STAT1  | RNU6-450P |
| TFAP2C | RNU6-450P |
| IGF1R  | RNU6-458P |
| HIF1A  | RNU6-481P |
| BACH1  | RNU6-491P |
| TRIM28 | RNU6-536P |
| STAT1  | RNU6-560P |
| SOX2   | RNU6-578P |
| STAT1  | RNU6-592P |
| TRIM28 | RNU6-636P |
| SOX2   | RNU6-66P  |
| SOX2   | RNU6-675P |
| TAL1   | RNU6-695P |
| HIF1A  | RNU6-699P |
| STAT1  | RNU6-738P |
| FOXA1  | RNU6-739P |
| STAT6  | RNU6-741P |
| HIF1A  | RNU6-745P |
| STAT1  | RNU6-745P |
| TRIM28 | RNU6-753P |
| GATA3  | RNU6-771P |
| HIF1A  | RNU6-778P |
| TP53   | RNU6-778P |
| TRIM28 | RNU6-791P |
| RUNX1  | RNU6-793P |
| ESR1   | RNU6-830P |
| STAT1  | RNU6-830P |
| SOX2   | RNU6-929P |
| FOXA1  | RNU6-929P |

|        |             |
|--------|-------------|
| STAT1  | RNU6-931P   |
| TP53   | RNU6-965P   |
| TP53   | RNU6-983P   |
| CEBPA  | RNU6-991P   |
| ESR2   | RNU6-991P   |
| GATA3  | RNU6-991P   |
| HNF4A  | RNU6-991P   |
| ESR1   | RNU6-991P   |
| STAT1  | RNU6-996P   |
| PRDM14 | RNU6ATAC14P |
| RUNX1  | RNU6ATAC14P |
| PRDM14 | RNU7-120P   |
| RUNX1  | RNU7-120P   |
| HIF1A  | RNU7-126P   |
| RUNX1  | RNU7-133P   |
| FOXA1  | RNU7-14P    |
| TFAP2C | RNU7-14P    |
| TFAP2C | RNU7-173P   |
| RB1    | RNU7-179P   |
| RBL2   | RNU7-179P   |
| PRDM14 | RNU7-190P   |
| TP53   | RNU7-62P    |
| EPAS1  | RNU7-85P    |
| FOXA1  | RNU7-92P    |
| TFAP2C | RNU7-92P    |
| CTCF   | RNVU1-18    |
| TP53   | RNVU1-8     |
| EGR1   | ROCK1       |
| ZNF263 | ROCK1       |
| FOS    | ROGDI       |
| TAL1   | ROR1        |

|         |               |
|---------|---------------|
| TRIM28  | ROR1          |
| EGR1    | RORA          |
| EPAS1   | RORA          |
| STAT1   | RP11-11L12.2  |
| TRIM28  | RP11-277L2.2  |
| TRIM28  | RP11-302I18.1 |
| ESR1    | RP11-423O2.3  |
| TP53    | RP11-423O2.3  |
| PRDM14  | RPA1          |
| E2F4    | RPA2          |
| RB1     | RPA2          |
| RBL2    | RPA2          |
| STAT6   | RPAIN         |
| TAL1    | RPAP2         |
| STAT6   | RPGRIP1L      |
| FOXA1   | RPL15P3       |
| STAT1   | RPL18A        |
| ESR1    | RPL21P24      |
| CTCF    | RPL22         |
| ETS1    | RPL22         |
| MITF    | RPL22         |
| RB1     | RPL22         |
| RBL2    | RPL22         |
| SMARCA4 | RPL22         |
| STAT6   | RPL23         |
| STAT6   | RPL26         |
| STAT1   | RPL28         |
| PRDM14  | RPL31P41      |
| FOXA1   | RPL35AP       |
| TFAP2C  | RPL35AP       |
| TFAP2C  | RPL35AP19     |

|        |          |
|--------|----------|
| STAT1  | RPL37    |
| STAT6  | RPL41    |
| STAT1  | RPL6P5   |
| BACH1  | RPLPOP6  |
| STAT1  | RPS10P7  |
| TP53   | RPS27    |
| FOXA1  | RPS27P1  |
| PRDM14 | RPS27P25 |
| E2F4   | RPS6KA1  |
| ESR2   | RPS6KA1  |
| GATA2  | RPS6KA1  |
| RB1    | RPS6KA1  |
| RBL2   | RPS6KA1  |
| TAL1   | RPS6KA1  |
| HNF4A  | RPS6KA6  |
| TRIM28 | RPS6KC1  |
| TRIM28 | RPS7P5   |
| RBL2   | RPS8     |
| TP53   | RPTN     |
| HIF1A  | RQCD1    |
| EGR1   | RRAD     |
| HIF1A  | RRAGA    |
| E2F4   | RRAGC    |
| TRIM28 | RRAGC    |
| EPAS1  | RRAGD    |
| TP53   | RRM1     |
| HIF1A  | RRM2     |
| HIF1A  | RRP12    |
| EPAS1  | RSBN1    |
| HIF1A  | RSBN1    |
| E2F4   | RSC1A1   |

|         |         |
|---------|---------|
| ETS1    | RSC1A1  |
| SMARCA4 | RSC1A1  |
| ETS1    | RSG1    |
| RBL2    | RSG1    |
| STAT6   | RSL24D1 |
| EGR1    | RSPH14  |
| ZNF263  | RSPH14  |
| EPAS1   | RSPH9   |
| E2F4    | RSRP1   |
| GATA2   | RSRP1   |
| RB1     | RSRP1   |
| RBL2    | RSRP1   |
| TFAP2C  | RTEL1   |
| STAT1   | RTEL1   |
| RUNX1   | RTKN2   |
| HIF1A   | RTN1    |
| RUNX1   | RTP5    |
| EGR1    | RUFY1   |
| PRDM14  | RUNX1   |
| STAT1   | RUNX1   |
| E2F4    | RUNX3   |
| ESR2    | RUNX3   |
| RB1     | RUNX3   |
| STAT6   | RUNX3   |
| TAL1    | RUNX3   |
| TP53    | RUNX3   |
| TRIM28  | RUNX3   |
| STAT1   | RUSC2   |
| TP53    | RWDD3   |
| RXRA    | RXRG    |
| RUNX1   | RYR1    |

|         |         |
|---------|---------|
| ZNF263  | RYR1    |
| STAT1   | S100A11 |
| TFAP2C  | S100A16 |
| SOX2    | S100A2  |
| TP53    | S100A2  |
| EPAS1   | S100A4  |
| TP53    | S100A6  |
| STAT1   | S100A8  |
| NFIA    | S100B   |
| TFAP2A  | S100B   |
| TP53    | S100B   |
| RB1     | S100PBP |
| HIF1A   | SAFB2   |
| CTCF    | SAMD11  |
| E2F4    | SAMD11  |
| ETS1    | SAMD11  |
| GATA3   | SAMD11  |
| MITF    | SAMD11  |
| RB1     | SAMD11  |
| RBL2    | SAMD11  |
| SMARCA4 | SAMD11  |
| SOX2    | SAMD12  |
| HIF1A   | SAP30   |
| STAT1   | SAP30BP |
| ESR1    | SAR1A   |
| STAT6   | SAR1A   |
| FOXA1   | SASH1   |
| FOXA1   | SAXO2   |
| HIF1A   | SBF2    |
| ZNF263  | SBNO2   |
| STAT1   | SCAF11  |

|         |          |
|---------|----------|
| EGR1    | SCARB1   |
| EPAS1   | SCARB1   |
| CTCF    | SCARNA11 |
| SMARCA4 | SCARNA11 |
| PRDM14  | SCG2     |
| TP53    | SCGB1D2  |
| DAND5   | SCGB2A1  |
| NFIA    | SCGB2A1  |
| NFYA    | SCGB2A1  |
| SP3     | SCGB2A1  |
| STAT1   | SCHIP1   |
| EGR1    | SCMH1    |
| TP53    | SCMH1    |
| EPAS1   | SCN1A    |
| TP53    | SCNM1    |
| CTCF    | SCNN1D   |
| HNF4A   | SCNN1D   |
| MITF    | SCNN1D   |
| HIF1A   | SCRN1    |
| EGR1    | SCUBE1   |
| STAT1   | SCYL3    |
| BACH1   | SDC3     |
| EGR1    | SDC3     |
| RB1     | SDC3     |
| TRIM28  | SDC3     |
| TRIM28  | SDCCAG8  |
| FOS     | SDF2L1   |
| E2F4    | SDF4     |
| MITF    | SDF4     |
| TP53    | SDF4     |
| ETS1    | SDHB     |



|        |         |
|--------|---------|
| GATA3  | SDHB    |
| MITF   | SDHB    |
| RB1    | SDHB    |
| RBL2   | SDHB    |
| TAL1   | SDHB    |
| SOX2   | SDK1    |
| STAT1  | SEC14L1 |
| EPAS1  | SEC14L2 |
| STAT6  | SEC22B  |
| RUNX1  | SEC23IP |
| ESR1   | SEC31B  |
| RUNX1  | SEC31B  |
| ESR1   | SEC61A2 |
| HIF1A  | SEC61G  |
| STAT1  | SECTM1  |
| EGR1   | SEH1L   |
| STAT1  | SEL1L   |
| STAT1  | SELPLG  |
| STAT6  | SELPLG  |
| FOXA1  | SEMA3A  |
| BACH1  | SEMA3E  |
| EPAS1  | SEMA4B  |
| STAT1  | SEMA4B  |
| EPAS1  | SEMA4F  |
| SOX2   | SEMA5A  |
| EPAS1  | SEMA5B  |
| PRDM14 | SENP1   |
| TFAP2C | SENP1   |
| FOS    | SENP3   |
| RB1    | SEPN1   |
| STAT6  | SEPT12  |

|        |          |
|--------|----------|
| HIF1A  | SEPT7    |
| HIF1A  | SEPT9    |
| STAT1  | SEPT9    |
| ZNF263 | SEPT9    |
| TRIM28 | SEPW1P   |
| RB1    | SERBP1   |
| STAT6  | SERF2    |
| GATA2  | SERINC2  |
| STAT6  | SERINC4  |
| RUNX1  | SERINC5  |
| FOS    | SERPINA3 |
| NFKB1  | SERPINA3 |
| STAT1  | SERPINA3 |
| SPI1   | SERPINB1 |
| HNF4A  | SERPINC1 |
| EPAS1  | SERPINE1 |
| HIF1A  | SERPINE1 |
| NFIA   | SERPINE1 |
| OLIG1  | SERPINE1 |
| SMAD2  | SERPINE1 |
| SRF    | SERPINE1 |
| TP53   | SERTAD1  |
| FOS    | SERTAD2  |
| TRIM28 | SERTAD4  |
| RBL2   | SESN2    |
| STAT6  | SETD1B   |
| ZNF263 | SETD1B   |
| FOS    | SETD5    |
| STAT6  | SETD8    |
| PRDM14 | SEZ6     |
| HIF1A  | SEZ6L2   |

|        |          |
|--------|----------|
| E2F4   | SF3A3    |
| RB1    | SF3A3    |
| TP53   | SF3A3    |
| FOXA1  | SFMBT2   |
| E2F4   | SFN      |
| ESR2   | SFN      |
| RB1    | SFN      |
| RBL2   | SFN      |
| E2F4   | SFPQ     |
| STAT1  | SFRP1    |
| ESR1   | SFTA1P   |
| PRDM14 | SFXN1    |
| EPAS1  | SFXN3    |
| STAT6  | SFXN3    |
| TAL1   | SGIP1    |
| TP53   | SGIP1    |
| TRIM28 | SGIP1    |
| ESR1   | SGMS1    |
| FOXA1  | SGMS1    |
| RUNX1  | SGSM1    |
| RBL2   | SH2D5    |
| E2F4   | SH3BGRL3 |
| RUNX1  | SH3BP5   |
| E2F4   | SH3D21   |
| TFAP2C | SH3GL1   |
| RB1    | SH3GLB1  |
| EPAS1  | SH3RF3   |
| EPAS1  | SHANK2   |
| HIF1A  | SHANK2   |
| FOS    | SHARPIN  |
| EPAS1  | SHB      |

|         |          |
|---------|----------|
| HNF4A   | SHBG     |
| FOS     | SHC1     |
| ZNF263  | SHOX2    |
| EPAS1   | SIAH2    |
| TP53    | SIKE1    |
| FOS     | SIN3A    |
| RUNX1   | SIPA1L2  |
| STAT6   | SIRT1    |
| CEBPA   | SKI      |
| E2F4    | SKI      |
| ETS1    | SKI      |
| GATA2   | SKI      |
| HNF4A   | SKI      |
| MITF    | SKI      |
| RB1     | SKI      |
| RBL2    | SKI      |
| SMARCA4 | SKI      |
| HIF1A   | SKIDA1   |
| ESR1    | SKINTL   |
| STAT1   | SLA      |
| STAT6   | SLAMF6   |
| HIF1A   | SLC11A2  |
| STAT1   | SLC12A8  |
| STAT6   | SLC15A4  |
| TRIM28  | SLC16A1  |
| PRDM14  | SLC1A1   |
| RBL2    | SLC1A7   |
| HNF4A   | SLC22A1  |
| ESR1    | SLC22A15 |
| FOXA1   | SLC22A15 |
| EGR1    | SLC22A20 |

|         |          |
|---------|----------|
| TFAP2C  | SLC24A3  |
| BACH1   | SLC25A10 |
| ESR1    | SLC25A24 |
| FOS     | SLC25A25 |
| STAT1   | SLC25A25 |
| ESR1    | SLC25A28 |
| STAT6   | SLC25A28 |
| HIF1A   | SLC25A32 |
| CEBPA   | SLC25A33 |
| CTCF    | SLC25A33 |
| E2F4    | SLC25A33 |
| ETS1    | SLC25A33 |
| GATA3   | SLC25A33 |
| HNF4A   | SLC25A33 |
| MITF    | SLC25A33 |
| RB1     | SLC25A33 |
| RBL2    | SLC25A33 |
| SMARCA4 | SLC25A33 |
| CTCF    | SLC25A34 |
| EPAS1   | SLC25A36 |
| FOXA1   | SLC25A36 |
| FOS     | SLC25A41 |
| ZNF263  | SLC25A41 |
| FOS     | SLC25A42 |
| TFAP2C  | SLC25A42 |
| DAND5   | SLC25A5  |
| NFIA    | SLC25A5  |
| TBP     | SLC25A5  |
| STAT1   | SLC26A11 |
| FOXA1   | SLC26A7  |
| EPAS1   | SLC28A1  |

|         |         |
|---------|---------|
| TFAP2C  | SLC29A2 |
| ESR1    | SLC29A3 |
| EPAS1   | SLC2A1  |
| ESR1    | SLC2A1  |
| HIF1A   | SLC2A1  |
| RB1     | SLC2A1  |
| STAT6   | SLC2A1  |
| TP53    | SLC2A1  |
| FOXM1   | SLC2A2  |
| HNF1A   | SLC2A2  |
| MEF2A   | SLC2A4  |
| CEBPA   | SLC2A5  |
| ESR1    | SLC2A5  |
| HIF1A   | SLC2A5  |
| RBL2    | SLC2A5  |
| SMARCA4 | SLC2A5  |
| STAT6   | SLC2A5  |
| TAL1    | SLC2A5  |
| CEBPA   | SLC2A7  |
| RB1     | SLC2A7  |
| SOX2    | SLC30A1 |
| TP53    | SLC30A1 |
| HIF1A   | SLC35A4 |
| HIF1A   | SLC35B4 |
| HIF1A   | SLC35C2 |
| CEBPA   | SLC35E2 |
| ETS1    | SLC35E2 |
| HNF4A   | SLC35E2 |
| STAT1   | SLC35F6 |
| EPAS1   | SLC38A2 |
| FOXA1   | SLC38A2 |

|        |          |
|--------|----------|
| STAT1  | SLC39A11 |
| TFAP2C | SLC39A11 |
| STAT1  | SLC39A12 |
| SOX2   | SLC3A2   |
| STAT6  | SLC41A1  |
| RUNX1  | SLC44A1  |
| TRIM28 | SLC44A3  |
| TP53   | SLC44A5  |
| CTCF   | SLC45A1  |
| HNF4A  | SLC45A1  |
| RB1    | SLC45A1  |
| RBL2   | SLC45A1  |
| RUNX1  | SLC47A1  |
| BACH1  | SLC48A1  |
| FOXA1  | SLC4A10  |
| HIF1A  | SLC4A4   |
| PRDM14 | SLC6A11  |
| PRDM14 | SLC6A15  |
| Hoxa5  | SLC6A2   |
| PHOX2A | SLC6A2   |
| SCRT1  | SLC6A2   |
| SNAI2  | SLC6A2   |
| USF1   | SLC6A2   |
| USF2   | SLC6A2   |
| NR4A2  | SLC6A3   |
| SP1    | SLC6A3   |
| SP3    | SLC6A3   |
| ZBTB14 | SLC6A3   |
| Fev    | SLC6A4   |
| YBX1   | SLC6A4   |
| EPAS1  | SLC6A6   |

|        |          |
|--------|----------|
| TAL1   | SLC6A9   |
| SOX2   | SLC7A1   |
| BACH1  | SLC7A11  |
| EPAS1  | SLC7A5   |
| STAT6  | SLC7A5P2 |
| E2F4   | SLC9A1   |
| GATA2  | SLC9A1   |
| RB1    | SLC9A1   |
| TAL1   | SLC9A1   |
| BACH1  | SLC9A9   |
| EPAS1  | SLC9A9   |
| EGR1   | SLCO5A1  |
| ZNF263 | SLCO5A1  |
| STAT6  | SLX4     |
| BACH1  | SLX4IP   |
| STAT1  | SMAD6    |
| EPAS1  | SMAD7    |
| OLIG1  | SMAD7    |
| SMAD2  | SMAD7    |
| STAT1  | SMAD9    |
| HIF1A  | SMAP2    |
| BACH1  | SMARCA4  |
| EPAS1  | SMARCA5  |
| TFAP2C | SMARCD2  |
| HIF1A  | SMC2     |
| RUNX1  | SMCO1    |
| HIF1A  | SMEK2    |
| STAT6  | SMG7     |
| TP53   | SMG7     |
| HIF1A  | SMG9     |
| E2F4   | SMIM12   |



|         |          |
|---------|----------|
| ESR1    | SMIM12   |
| RB1     | SMIM12   |
| EGR1    | SMIM24   |
| STAT1   | SMOC1    |
| FOS     | SMPD4P1  |
| SNAI1   | SNAI1    |
| STAT1   | SNAI1    |
| RUNX1   | SNAI2    |
| EGR1    | SNAPC2   |
| HIF1A   | SNAPC3   |
| STAT1   | SNAPIN   |
| HIF1A   | SND1     |
| RB1     | SNHG12   |
| SOX2    | SNHG5    |
| E2F4    | SNIP1    |
| RB1     | SNIP1    |
| RBL2    | SNIP1    |
| E2F4    | SNORA    |
| FOXA1   | SNORA31  |
| FOXA1   | SNORA40  |
| SOX2    | SNORA51  |
| EGR1    | SNORA57  |
| STAT1   | SNORA63  |
| ETS1    | SNORA70  |
| SMARCA4 | SNORA70  |
| PRDM14  | SNORD114 |
| PRDM14  | SNORD2   |
| STAT6   | SNORD27  |
| SOX2    | SNORD28  |
| HIF1A   | SNORD38B |
| FOXA1   | SNORD45  |

|        |          |
|--------|----------|
| FOXA1  | SNORD81  |
| SOX2   | snoRNA   |
| HIF1A  | snoU109  |
| BACH1  | snoU13   |
| CEBPA  | snoU13   |
| EGR1   | snoU13   |
| FOXA1  | snoU13   |
| HIF1A  | snoU13   |
| PRDM14 | snoU13   |
| RB1    | snoU13   |
| RBL2   | snoU13   |
| SOX2   | snoU13   |
| STAT1  | snoU13   |
| TP53   | snoU13   |
| ZNF263 | snoU13   |
| SOX2   | snoZ13   |
| E2F4   | SNRNP40  |
| ESR1   | SNRNP40  |
| TFAP2C | SNRPB2   |
| PRDM14 | SNX18P23 |
| STAT6  | SNX29    |
| TP53   | SNX7     |
| EGR1   | SNX8     |
| STAT6  | SOCS1    |
| SOX2   | SOCS2    |
| STAT1  | SOCS3    |
| HIF1A  | SOCS6    |
| PRDM14 | SOGA3    |
| HIF1A  | SORBS2   |
| SOX2   | SORBS2   |
| STAT6  | SORL1    |

|         |         |
|---------|---------|
| ESR1    | SORT1   |
| HIF1A   | SOS1    |
| RUNX1   | SOX11   |
| PBX1    | SOX3    |
| EPAS1   | SOX9    |
| FOS     | SP1     |
| FOS     | SP2     |
| EGR1    | SP3     |
| NFYA    | SP3     |
| SP1     | SP3     |
| BACH1   | SPAG16  |
| RUNX1   | SPAG16  |
| RUNX1   | SPAG5   |
| FOS     | SPAG7   |
| SP1     | SPARC   |
| ZNF263  | SPATA16 |
| ETS1    | SPATA21 |
| RBL2    | SPATA21 |
| STAT6   | SPATA33 |
| RB1     | SPATA6  |
| TP53    | SPATA6  |
| SOX2    | SPATA6L |
| E2F4    | SPEN    |
| ESR2    | SPEN    |
| ETS1    | SPEN    |
| GATA3   | SPEN    |
| RB1     | SPEN    |
| RBL2    | SPEN    |
| SMARCA4 | SPEN    |
| ZNF263  | SPI1    |
| HIF1A   | SPICE1  |

|        |         |
|--------|---------|
| STAT1  | SPIDR   |
| FOXA1  | SPINK1  |
| TFAP2C | SPO11   |
| ESR1   | SPOCD1  |
| RB1    | SPOCD1  |
| RBL2   | SPOCD1  |
| TAL1   | SPOCD1  |
| ESR1   | SPOCK2  |
| EPAS1  | SPRY1   |
| HIF1A  | SPRY1   |
| CEBPA  | SPSB1   |
| CTCF   | SPSB1   |
| ESR1   | SPSB1   |
| ESR2   | SPSB1   |
| ETS1   | SPSB1   |
| GATA3  | SPSB1   |
| HNF4A  | SPSB1   |
| MITF   | SPSB1   |
| RB1    | SPSB1   |
| RBL2   | SPSB1   |
| FOS    | SPSB3   |
| HIF1A  | SPTBN1  |
| STAT1  | SPTBN1  |
| FOS    | SPTBN4  |
| FOS    | SPTLC2  |
| BACH1  | SQSTM1  |
| TP53   | SRGAP2B |
| E2F4   | SRM     |
| ETS1   | SRM     |
| MITF   | SRM     |
| RB1    | SRM     |

|         |        |
|---------|--------|
| SMARCA4 | SRM    |
| STAT6   | SRP14  |
| FOXA1   | SRPK2  |
| E2F4    | SRRM1  |
| GATA2   | SRRM1  |
| RB1     | SRRM1  |
| RBL2    | SRRM1  |
| E2F4    | SRSF10 |
| ESR1    | SRSF10 |
| ESR2    | SRSF10 |
| GATA2   | SRSF10 |
| RB1     | SRSF10 |
| RBL2    | SRSF10 |
| RB1     | SRSF11 |
| E2F4    | SRSF4  |
| RB1     | SRSF4  |
| RBL2    | SRSF4  |
| STAT6   | SRSF5  |
| RB1     | SSBP3  |
| RBL2    | SSBP3  |
| TRIM28  | SSBP3  |
| ZNF263  | SSBP4  |
| BACH1   | SSC4D  |
| ZNF263  | SSFA2  |
| STAT6   | SSH2   |
| CEBPA   | SSU72  |
| E2F4    | SSU72  |
| ETS1    | SSU72  |
| HNF4A   | SSU72  |
| MITF    | SSU72  |
| RB1     | SSU72  |

|        |            |
|--------|------------|
| RBL2   | SSU72      |
| PRDM14 | SSUH2      |
| TAL1   | SSX2IP     |
| PRDM14 | ST14       |
| RUNX1  | ST18       |
| HIF1A  | ST3GAL1    |
| ESR1   | ST3GAL3    |
| TAL1   | ST3GAL3    |
| TRIM28 | ST3GAL3    |
| STAT1  | ST5        |
| STAT1  | ST6GALNAC2 |
| TAL1   | ST6GALNAC3 |
| TP53   | ST6GALNAC3 |
| TP53   | ST6GALNAC5 |
| BACH1  | ST8SIA2    |
| STAT1  | ST8SIA4    |
| EPAS1  | ST8SIA6    |
| HIF1A  | STAMBP     |
| STAT1  | STAMBPL1   |
| STAT6  | STAMBPL1   |
| TFAP2C | STARD10    |
| STAT1  | STAT1      |
| STAT1  | STAT2      |
| STAT1  | STAT3      |
| HIF1A  | STBD1      |
| EPAS1  | STC1       |
| HIF1A  | STC1       |
| EPAS1  | STC2       |
| HIF1A  | STC2       |
| RB1    | STIL       |
| RBL2   | STIL       |

|        |         |
|--------|---------|
| STAT6  | STIL    |
| STAT1  | STIM1   |
| FOS    | STIP1   |
| STAT6  | STK38L  |
| FOS    | STK40   |
| RB1    | STK40   |
| RBL2   | STK40   |
| E2F4   | STMN1   |
| RB1    | STMN1   |
| RBL2   | STMN1   |
| ESR2   | STPG1   |
| GATA3  | STPG1   |
| RB1    | STPG1   |
| RBL2   | STPG1   |
| FOS    | STRA13  |
| FOS    | STT3A   |
| GATA2  | STX12   |
| RB1    | STX12   |
| TFAP2C | STX16   |
| ZNF263 | STX16   |
| TFAP2C | STX1A   |
| RUNX1  | STX3    |
| TRIM28 | STX6    |
| STAT1  | SUCLA2  |
| STAT6  | SUGT1   |
| EPAS1  | SUMF1   |
| HIF1A  | SUMF1   |
| TFAP2C | SUMF1   |
| FOXA1  | SUMO1P1 |
| TFAP2C | SUMO1P1 |
| EGR1   | SUMO3   |

|        |          |
|--------|----------|
| TFAP2C | SUMO3    |
| RUNX1  | SUSD1    |
| TP53   | SUSD4    |
| FOS    | SUV420H2 |
| STAT6  | SVIP     |
| EPAS1  | SWAP70   |
| STAT6  | SWAP70   |
| FOS    | SWSAP1   |
| GATA2  | SYF2     |
| RB1    | SYF2     |
| RBL2   | SYF2     |
| TAL1   | SYF2     |
| EPAS1  | SYK      |
| RUNX1  | SYK      |
| REST   | SYN1     |
| ZNF263 | SYN3     |
| STAT1  | SYNE1    |
| STAT1  | SYNE2    |
| EGR1   | SYNGAP1  |
| BACH1  | SYNJ2    |
| ZNF263 | SYNJ2    |
| BACH1  | SYNM     |
| FOXA1  | SYNPR    |
| FOS    | SYP      |
| PRDM14 | SYT1     |
| STAT6  | SYT1     |
| SOX2   | SYT4     |
| ESR1   | SYT6     |
| FOXA1  | SYT6     |
| HIF1A  | SYT6     |
| TRIM28 | SYT6     |



|        |        |
|--------|--------|
| ESR2   | SYTL1  |
| RUNX1  | SYTL2  |
| STAT6  | SYVN1  |
| CTCF   | SZRD1  |
| ETS1   | SZRD1  |
| GATA2  | SZRD1  |
| MITF   | SZRD1  |
| RB1    | SZRD1  |
| RBL2   | SZRD1  |
| CREM   | TAC1   |
| NFKB1  | TAC1   |
| RELA   | TAC1   |
| REST   | TAC1   |
| ESR1   | TACC2  |
| ESR1   | TACR2  |
| E2F4   | TAF12  |
| GATA2  | TAF12  |
| TAL1   | TAF12  |
| TP53   | TAF12  |
| STAT6  | TAF1D  |
| ESR1   | TAF3   |
| EGR1   | TAF4   |
| STAT6  | TAGLN2 |
| Spi1   | TAL1   |
| TRIM28 | TAL1   |
| EGR1   | TALDO1 |
| ZNF263 | TALDO1 |
| FOS    | TANGO2 |
| TP53   | TARBP1 |
| ETS1   | TARDBP |
| RB1    | TARDBP |

|         |          |
|---------|----------|
| RBL2    | TARDBP   |
| STAT6   | TARDBP   |
| HIF1A   | TARS     |
| STAT1   | TARS     |
| STAT6   | TARS2    |
| TP53    | TARS2    |
| CEBPA   | TAS1R1   |
| CTCF    | TAS1R1   |
| ETS1    | TAS1R1   |
| HNF4A   | TAS1R1   |
| RBL2    | TAS1R1   |
| SMARCA4 | TAS1R1   |
| FOS     | TBC1D10B |
| PRDM14  | TBC1D20  |
| RUNX1   | TBC1D4   |
| PRDM14  | TBC1D9   |
| STAT1   | TBCB     |
| STAT1   | TBKBP1   |
| STAT1   | TBL1X    |
| PRDM14  | TBL2     |
| RUNX1   | TBPL1    |
| EGR1    | TBX1     |
| ZNF263  | TBX1     |
| TFAP2C  | TBX2     |
| PRDM14  | TBX5     |
| ESR2    | TCEA3    |
| GATA3   | TCEA3    |
| TP53    | TCEA3    |
| EPAS1   | TCEAL3   |
| RBL2    | TCEANC2  |
| ESR1    | TCEB1P20 |

|        |          |
|--------|----------|
| E2F4   | TCEB3    |
| GATA3  | TCEB3    |
| FOS    | TCERG1   |
| STAT1  | TCERG1   |
| TFAP2C | TCF25    |
| RUNX1  | TCF7     |
| TFAP2C | TCF7L1   |
| ESR1   | TCF7L2   |
| TRIM28 | TCHH     |
| TFAP2C | TCL1A    |
| STAT6  | TCL6     |
| STAT6  | TCP11L2  |
| RBL2   | TCTEX1D4 |
| yy1    | TDO2     |
| RUNX1  | TDRD12   |
| FOS    | TDRKH    |
| RUNX1  | TENM1    |
| FOXA1  | TENM4    |
| FOXA1  | TES      |
| RB1    | TESK2    |
| PRDM14 | TET2     |
| BACH1  | TEX19    |
| FOS    | TEX19    |
| NFIC   | TFAP2A   |
| POU2F1 | TFAP2A   |
| TFAP2A | TFAP2A   |
| STAT1  | TFAP2C   |
| PRDM14 | TFAP2D   |
| TAL1   | TFAP2E   |
| TFAP2C | TFAP4    |
| ZNF263 | TFB2M    |

|          |         |
|----------|---------|
| BACH1    | TFE3    |
| EPAS1    | TFP1    |
| CAND1.11 | TFRC    |
| AMPD3    | TFRC    |
| EPAS1    | TG      |
| ZNF263   | TGFB1   |
| EPAS1    | TGFBI   |
| ZNF263   | TGIF1   |
| STAT1    | TGM2    |
| ZNF263   | TGS1    |
| Gsc2     | TH      |
| NR4A2    | TH      |
| REST     | TH      |
| FOXA1    | THADA   |
| ETS1     | THAP3   |
| RB1      | THAP3   |
| SRF      | THBS1   |
| HIF1A    | THBS2   |
| RB1      | THEMIS2 |
| E2F4     | THRAP3  |
| ESR1     | THRAP3  |
| RBL2     | THRAP3  |
| STAT1    | THRSP   |
| HIF1A    | TICAM2  |
| FOS      | TICRR   |
| HIF1A    | TIMM13  |
| GATA2    | TINAGL1 |
| TAL1     | TINAGL1 |
| HIF1A    | TLDC1   |
| EPAS1    | TLE1    |
| FOXA1    | TLE1    |

|        |          |
|--------|----------|
| RUNX1  | TLE1     |
| FOXA1  | TLE4     |
| HIF1A  | TLE4     |
| ESR1   | TLL2     |
| SPI1   | TLR4     |
| PHOX2B | TLX2     |
| RXRA   | TLX2     |
| ESR1   | TM2D1    |
| TAL1   | TM2D1    |
| TP53   | TM2D1    |
| FOXA1  | TM4SF1   |
| ZNF263 | TMBIM4   |
| STAT1  | TMC1     |
| ESR2   | TMCO4    |
| GATA2  | TMCO4    |
| GATA3  | TMCO4    |
| PRDM14 | TMCO4    |
| RB1    | TMCO4    |
| RBL2   | TMCO4    |
| TFAP2C | TMEM105  |
| EGR1   | TMEM106A |
| ZNF263 | TMEM106A |
| STAT6  | TMEM107  |
| STAT6  | TMEM11   |
| IGF1R  | TMEM117  |
| ZNF263 | TMEM120A |
| EGR1   | TMEM120B |
| HIF1A  | TMEM144  |
| FOS    | TMEM160  |
| ZNF263 | TMEM164  |
| HIF1A  | TMEM18   |

|         |          |
|---------|----------|
| ZNF263  | TMEM18   |
| TP53    | TMEM183  |
| BACH1   | TMEM189  |
| EPAS1   | TMEM189  |
| STAT1   | TMEM189  |
| E2F4    | TMEM200B |
| RB1     | TMEM200B |
| RBL2    | TMEM200B |
| CEBPA   | TMEM201  |
| CTCF    | TMEM201  |
| E2F4    | TMEM201  |
| ETS1    | TMEM201  |
| MITF    | TMEM201  |
| RB1     | TMEM201  |
| SMARCA4 | TMEM201  |
| STAT6   | TMEM201  |
| RUNX1   | TMEM209  |
| E2F4    | TMEM222  |
| RB1     | TMEM222  |
| RBL2    | TMEM222  |
| ESR1    | TMEM26   |
| E2F4    | TMEM39B  |
| GATA2   | TMEM39B  |
| EPAS1   | TMEM44   |
| EPAS1   | TMEM45A  |
| HIF1A   | TMEM45A  |
| STAT1   | TMEM45B  |
| CTCF    | TMEM51   |
| E2F4    | TMEM51   |
| ESR1    | TMEM51   |
| ESR2    | TMEM51   |

|         |            |
|---------|------------|
| GATA2   | TMEM51     |
| GATA3   | TMEM51     |
| MITF    | TMEM51     |
| RB1     | TMEM51     |
| RBL2    | TMEM51     |
| SMARCA4 | TMEM51     |
| TAL1    | TMEM51     |
| CTCF    | TMEM51-AS1 |
| GATA3   | TMEM51-AS1 |
| MITF    | TMEM51-AS1 |
| RB1     | TMEM51-AS1 |
| RBL2    | TMEM51-AS1 |
| SMARCA4 | TMEM51-AS1 |
| TAL1    | TMEM51-AS1 |
| CEBPA   | TMEM52     |
| ETS1    | TMEM52     |
| HNF4A   | TMEM52     |
| E2F4    | TMEM54     |
| TP53    | TMEM54     |
| GATA2   | TMEM57     |
| TAL1    | TMEM57     |
| FOS     | TMEM60     |
| RBL2    | TMEM61     |
| EGR1    | TMEM63C    |
| RB1     | TMEM69     |
| TRIM28  | TMEM78     |
| CEBPA   | TMEM88B    |
| ESR1    | TMEM88B    |
| ESR2    | TMEM88B    |
| GATA2   | TMEM88B    |
| HNF4A   | TMEM88B    |

|         |           |
|---------|-----------|
| RBL2    | TMEM88B   |
| TFAP2C  | TMEM9     |
| EPAS1   | TMPRSS3   |
| HIF1A   | TMPRSS3   |
| STAT1   | TMPRSS3   |
| FOXA1   | TMPRSS4   |
| NFATC2  | TNF       |
| BACH1   | TNFAIP2   |
| EPAS1   | TNFAIP3   |
| SOX2    | TNFAIP3   |
| DDIT3   | TNFRSF10B |
| TP53    | TNFRSF10B |
| HIF1A   | TNFRSF10D |
| STAT6   | TNFRSF12A |
| CTCF    | TNFRSF14  |
| E2F4    | TNFRSF14  |
| ETS1    | TNFRSF14  |
| HNF4A   | TNFRSF14  |
| MITF    | TNFRSF14  |
| RBL2    | TNFRSF14  |
| SMARCA4 | TNFRSF14  |
| E2F4    | TNFRSF18  |
| SMARCA4 | TNFRSF18  |
| BACH1   | TNFRSF1A  |
| STAT1   | TNFRSF1A  |
| CEBPA   | TNFRSF1B  |
| CTCF    | TNFRSF1B  |
| E2F4    | TNFRSF1B  |
| ETS1    | TNFRSF1B  |
| GATA2   | TNFRSF1B  |
| MITF    | TNFRSF1B  |



|         |          |
|---------|----------|
| RB1     | TNFRSF1B |
| RBL2    | TNFRSF1B |
| SMARCA4 | TNFRSF1B |
| TAL1    | TNFRSF1B |
| TP53    | TNFRSF1B |
| ETS1    | TNFRSF4  |
| RBL2    | TNFRSF4  |
| SMARCA4 | TNFRSF4  |
| EGR1    | TNFRSF6B |
| STAT1   | TNFRSF6B |
| CTCF    | TNFRSF8  |
| E2F4    | TNFRSF8  |
| ESR1    | TNFRSF8  |
| ESR2    | TNFRSF8  |
| ETS1    | TNFRSF8  |
| GATA2   | TNFRSF8  |
| GATA3   | TNFRSF8  |
| MITF    | TNFRSF8  |
| RB1     | TNFRSF8  |
| RBL2    | TNFRSF8  |
| SMARCA4 | TNFRSF8  |
| CTCF    | TNFRSF9  |
| GATA3   | TNFRSF9  |
| SMARCA4 | TNFRSF9  |
| NFATC2  | TNFSF13B |
| NFATC1  | TNFSF13B |
| FOXA1   | TNFSF8   |
| TFAP2C  | TNFSF8   |
| TRIM28  | TNN      |
| NVL     | TNNI1    |
| TRIM28  | TNNI1    |

|              |          |
|--------------|----------|
| RUNX1        | TNRC18   |
| FOS          | TNRC6B   |
| EGR1         | TNS3     |
| HIF1A        | TNS3     |
| STAT6        | TOB1     |
| RB1          | TOE1     |
| RBL2         | TOE1     |
| FOS          | TOM1     |
| HIF1A        | TOMM34   |
| PRDM14       | TOMM34   |
| FOS          | TOMM40   |
| FOS          | TOP2A    |
| YY1; MIR6764 | TOP3A    |
| ZNF263       | TOP3B    |
| RUNX1        | TOX2     |
| STAT1        | TOX2     |
| DAND5        | TP53     |
| NFIA         | TP53     |
| NFKB1        | TP53     |
| NFYA         | TP53     |
| PRDM14       | TP53AIP1 |
| CEBPA        | TP73     |
| CTCF         | TP73     |
| GATA3        | TP73     |
| HNF4A        | TP73     |
| TP53         | TP73     |
| E2F4         | TP73-AS1 |
| ETS1         | TP73-AS1 |
| RBL2         | TP73-AS1 |
| FOXA1        | TPBG     |
| EPAS1        | TPCN2    |

|         |          |
|---------|----------|
| TFAP2C  | TPCN2    |
| EPAS1   | TPD52    |
| HIF1A   | TPD52    |
| Fev     | TPH1     |
| SP1     | TPI1     |
| TP53    | TPM3     |
| HIF1A   | TPR      |
| RUNX1   | TPRA1    |
| TFAP2C  | TPRG1    |
| EPAS1   | TPRG1    |
| CTCF    | TPRG1L   |
| E2F4    | TPRG1L   |
| ETS1    | TPRG1L   |
| HNF4A   | TPRG1L   |
| RB1     | TPRG1L   |
| SMARCA4 | TPRG1L   |
| HIF1A   | TPRXL    |
| FOS     | TRAF2    |
| EGR1    | TRAM2    |
| EPAS1   | TRAM2    |
| E2F4    | TRAPPC3  |
| RBL2    | TRAPPC3  |
| TAL1    | TRAPPC3  |
| FOS     | TRAPPC6A |
| EGR1    | TRAPPC8  |
| ZNF263  | TRAPPC9  |
| RUNX1   | TRBV30   |
| ZNF263  | TRGV7    |
| CREB1   | TRH      |
| STAT3   | TRH      |
| THRB    | TRH      |

|        |          |
|--------|----------|
| FOXA1  | TRIB1    |
| RUNX1  | TRIB1    |
| STAT1  | TRIB1    |
| TFAP2C | TRIB1    |
| PRDM14 | TRIB2    |
| FOXA1  | TRIM14   |
| STAT1  | TRIM25   |
| STAT6  | TRIM25   |
| ESR1   | TRIM33   |
| TP53   | TRIM33   |
| SOX2   | TRIM36   |
| STAT6  | TRIM37   |
| TFAP2C | TRIM37   |
| IGF1R  | TRIM48   |
| BACH1  | TRIM56   |
| GATA2  | TRIM62   |
| ESR1   | TRIM63   |
| ESR2   | TRIM63   |
| IGF1R  | TRIM64C  |
| ZNF263 | TRIM67   |
| EGR1   | TRIO     |
| ZNF263 | TRIP13   |
| FOXA1  | TRIQK    |
| ESR1   | TRIT1    |
| HIF1A  | TRIT1    |
| E2F4   | TRNAU1AP |
| RB1    | TRNAU1AP |
| GATA2  | TRNP1    |
| RB1    | TRNP1    |
| EPAS1  | TRPC1    |
| SOX2   | TRPM3    |

|         |         |
|---------|---------|
| HIF1A   | TRPM4   |
| EPAS1   | TSC22D2 |
| EPAS1   | TSC22D3 |
| ZNF263  | TSC22D4 |
| EPAS1   | TSKU    |
| TFAP2C  | TSKU    |
| TP53    | TSNAX   |
| TP53    | TSPAN1  |
| ESR1    | TSPAN14 |
| PRDM14  | TSPAN14 |
| ESR1    | TSPAN15 |
| PRDM14  | TSPAN15 |
| STAT1   | TSPAN15 |
| ESR1    | TSPAN2  |
| TP53    | TSPAN2  |
| HIF1A   | TSPAN5  |
| RUNX1   | TSPAN7  |
| FOS     | TSPEAR  |
| FOXA1   | TSPYL5  |
| STAT6   | TSR1    |
| STAT6   | TSR3    |
| E2F4    | TSSK3   |
| HIF1A   | TSTD2   |
| RUNX1   | TTC28   |
| EGR1    | TTC3    |
| CEBPA   | TTC34   |
| CTCF    | TTC34   |
| ETS1    | TTC34   |
| HNF4A   | TTC34   |
| SMARCA4 | TTC34   |
| TAL1    | TTC34   |

|        |         |
|--------|---------|
| ESR1   | TTC39A  |
| E2F4   | TTLL10  |
| HIF1A  | TTLL11  |
| PRDM14 | TTLL7   |
| RB1    | TTLL7   |
| TAL1   | TTLL7   |
| PRDM14 | TTLL9   |
| CEBPA  | TTR     |
| ZNF263 | TUBA1C  |
| FOS    | TUBB4B  |
| STAT6  | TUT1    |
| STAT1  | TVP23A  |
| STAT6  | TVP23C  |
| E2F4   | TXLNA   |
| RBL2   | TXLNA   |
| NFE2L2 | TXN     |
| RBL2   | TXNDC12 |
| STAT6  | TXNIP   |
| NFE2L2 | TXNRD1  |
| MITF   | TYR     |
| STAT1  | TYROBP  |
| GATA2  | U1      |
| TRIM28 | U1      |
| GATA2  | U11     |
| RB1    | U11     |
| RBL2   | U13     |
| ESR1   | U3      |
| FOXA1  | U3      |
| SOX2   | U3      |
| TP53   | U3      |
| HIF1A  | U3      |

|         |         |
|---------|---------|
| TP53    | U3      |
| ZNF263  | U6      |
| STAT1   | U7      |
| STAT1   | U8      |
| RUNX1   | UACA    |
| HIF1A   | UBA5    |
| HIF1A   | UBA6    |
| EPAS1   | UBC     |
| CEBPA   | UBE2J2  |
| E2F4    | UBE2J2  |
| ESR2    | UBE2J2  |
| ETS1    | UBE2J2  |
| RB1     | UBE2J2  |
| RBL2    | UBE2J2  |
| SMARCA4 | UBE2J2  |
| TP53    | UBE2J2  |
| ZNF263  | UBE2L3  |
| EGR1    | UBE2W   |
| TP53    | UBE2WP1 |
| STAT6   | UBE3A   |
| FOXA1   | UBE3D   |
| CEBPA   | UBE4B   |
| CTCF    | UBE4B   |
| E2F4    | UBE4B   |
| ESR2    | UBE4B   |
| ETS1    | UBE4B   |
| GATA2   | UBE4B   |
| GATA3   | UBE4B   |
| HNF4A   | UBE4B   |
| MITF    | UBE4B   |
| RB1     | UBE4B   |

|         |        |
|---------|--------|
| RBL2    | UBE4B  |
| SMARCA4 | UBE4B  |
| TP53    | UBE4B  |
| CEBPA   | UBIAD1 |
| CTCF    | UBIAD1 |
| ETS1    | UBIAD1 |
| GATA3   | UBIAD1 |
| RB1     | UBIAD1 |
| RBL2    | UBIAD1 |
| SMARCA4 | UBIAD1 |
| TRIM28  | UBIAD1 |
| STAT6   | UBL3   |
| STAT6   | UBN1   |
| EGR1    | UBP1   |
| STAT1   | UBR1   |
| E2F4    | UBR4   |
| ETS1    | UBR4   |
| GATA2   | UBR4   |
| MITF    | UBR4   |
| RB1     | UBR4   |
| RBL2    | UBR4   |
| TAL1    | UBR4   |
| ETS1    | UBXN10 |
| GATA2   | UBXN10 |
| GATA3   | UBXN10 |
| E2F4    | UBXN11 |
| GATA2   | UBXN11 |
| RB1     | UBXN11 |
| TAL1    | UBXN11 |
| FOS     | UBXN6  |
| RUNX1   | UCA1   |



|        |         |
|--------|---------|
| TP53   | UCK2    |
| SP1    | UGDH    |
| HIF1A  | UGP2    |
| HNF1A  | UGT1A6  |
| SP1    | UGT1A6  |
| ZNF263 | UGT2B28 |
| EGR1   | UGT2B4  |
| ATF1   | UGT8    |
| CREB1  | UGT8    |
| SP1    | UGT8    |
| SP3    | UGT8    |
| PRDM14 | UHRF2   |
| HIF1A  | ULK2    |
| EGR1   | UNC45B  |
| PRDM14 | UNC45B  |
| STAT6  | UNC45B  |
| ZNF263 | UNC45B  |
| HIF1A  | UNC5D   |
| ZNF263 | UNKL    |
| ZNF263 | UPK1A   |
| EGR1   | UPK3A   |
| EGR1   | UPK3B   |
| TP53   | UQCRBP2 |
| RB1    | UQCRH   |
| HIF1A  | URM1    |
| TAL1   | UROD    |
| HIF1A  | USO1    |
| RB1    | USP1    |
| TRIM28 | USP1    |
| STAT1  | USP12   |
| EGR1   | USP14   |

|         |        |
|---------|--------|
| PRDM14  | USP14  |
| ZNF263  | USP14  |
| STAT6   | USP2   |
| STAT6   | USP21  |
| PRDM14  | USP3   |
| FOXA1   | USP32  |
| E2F4    | USP48  |
| ETS1    | USP48  |
| GATA2   | USP48  |
| GATA3   | USP48  |
| RBL2    | USP48  |
| FOS     | USP5   |
| RB1     | UTP11L |
| RBL2    | UTP11L |
| HIF1A   | UTRN   |
| CTCF    | UTS2   |
| FOS     | UVRAG  |
| CEBPA   | VAMP3  |
| ESR2    | VAMP3  |
| ETS1    | VAMP3  |
| RB1     | VAMP3  |
| RBL2    | VAMP3  |
| SMARCA4 | VAMP3  |
| ESR1    | VANGL1 |
| TP53    | VANGL2 |
| SPI1    | VAV1   |
| TFAP2C  | VAV2   |
| ESR1    | VAV3   |
| STAT6   | VAV3   |
| TP53    | VAV3   |
| HIF1A   | VDAC1  |

|        |       |
|--------|-------|
| STAT6  | VDR   |
| EPAS1  | VEGFA |
| HIF1A  | VEGFA |
| SP1    | VEGFA |
| EPAS1  | VEGFB |
| HIF1A  | VGLL4 |
| FOS    | VIM   |
| Hoxa5  | VIM   |
| JUN    | VIM   |
| NFKB1  | VIM   |
| SP1    | VIM   |
| STAT3  | VIM   |
| TRIM28 | VIM   |
| XRCC6  | VIM   |
| Zfp148 | VIM   |
| ZNF148 | VIM   |
| CEBPA  | VIP   |
| CEBPB  | VIP   |
| CEBPD  | VIP   |
| CREB1  | VIP   |
| FOS    | VIP   |
| FOSB   | VIP   |
| FOSL1  | VIP   |
| FOSL2  | VIP   |
| JUN    | VIP   |
| JUND   | VIP   |
| Nr3c1  | VIP   |
| POU2F1 | VIP   |
| POU2F2 | VIP   |
| REST   | VIP   |
| SMAD3  | VIP   |

|         |          |
|---------|----------|
| STAT1   | VIP      |
| STAT3   | VIP      |
| EPAS1   | VMP1     |
| STAT1   | VMP1     |
| STAT6   | VMP1     |
| EBF1    | VPREB1   |
| TCF3    | VPREB1   |
| CEBPA   | VPS13D   |
| CTCF    | VPS13D   |
| E2F4    | VPS13D   |
| ESR1    | VPS13D   |
| ESR2    | VPS13D   |
| ETS1    | VPS13D   |
| GATA2   | VPS13D   |
| GATA3   | VPS13D   |
| MITF    | VPS13D   |
| RB1     | VPS13D   |
| RBL2    | VPS13D   |
| SMARCA4 | VPS13D   |
| TAL1    | VPS13D   |
| TRIM28  | VPS13D   |
| PRDM14  | VPS37B   |
| HIF1A   | VPS45    |
| TP53    | VPS72    |
| EGR1    | VPS9D1   |
| STAT1   | VRK3     |
| RUNX1   | VSIG6    |
| ESR1    | VTCN1    |
| TFAP2C  | VTCN1    |
| ESR1    | VTI1A    |
| BACH1   | VTRNA1-1 |

|         |          |
|---------|----------|
| BACH1   | VTRNA1-2 |
| CTCF    | VWA1     |
| HNF4A   | VWA1     |
| MITF    | VWA1     |
| RB1     | VWA1     |
| SMARCA4 | VWA1     |
| ESR1    | VWA5B1   |
| ESR2    | VWA5B1   |
| GATA3   | VWA5B1   |
| PRDM14  | VWC2L    |
| STAT1   | WARS     |
| TP53    | WARS2    |
| RUNX1   | WASF1    |
| RB1     | WASF2    |
| TRIM28  | WASH7P   |
| FOS     | WBP1     |
| ESR1    | WDFY4    |
| HIF1A   | WDR27    |
| TFAP2C  | WDR34    |
| HIF1A   | WDR36    |
| RUNX1   | WDR37    |
| TP53    | WDR47    |
| HIF1A   | WDR54    |
| STAT6   | WDR59    |
| STAT6   | WDR66    |
| RUNX1   | WDR70    |
| STAT6   | WDR89    |
| E2F4    | WDTC1    |
| RB1     | WDTC1    |
| STAT6   | WEE1     |
| FOS     | WHAMM    |

|         |        |
|---------|--------|
| STAT1   | WIP1   |
| EPAS1   | WISP1  |
| RB1     | WLS    |
| HIF1A   | WNT2B  |
| PRDM14  | WNT3A  |
| ESR2    | WNT4   |
| GATA3   | WNT4   |
| PRDM14  | WNT8A  |
| TP53    | WNT9A  |
| STAT6   | WRAP53 |
| E2F4    | WRAP73 |
| ETS1    | WRAP73 |
| RB1     | WRAP73 |
| SMARCA4 | WRAP73 |
| MYC     | WRN    |
| PRDM14  | WSB1   |
| PRDM14  | WWOX   |
| STAT1   | WWOX   |
| RUNX1   | XKR6   |
| E2F4    | XKR8   |
| TP53    | XPR1   |
| FOXA1   | XRCC4  |
| HIF1A   | XXYL1  |
| IGF1R   | XYLT1  |
| STAT6   | XYLT1  |
| EGR1    | Y_RNA  |
| ESR1    | Y_RNA  |
| FOXA1   | Y_RNA  |
| HIF1A   | Y_RNA  |
| RB1     | Y_RNA  |
| STAT1   | Y_RNA  |

|         |         |
|---------|---------|
| STAT6   | Y_RNA   |
| TP53    | Y_RNA   |
| TRIM28  | Y_RNA   |
| ZNF263  | Y_RNA   |
| HIF1A   | Y_RNA   |
| RUNX1   | Y_RNA   |
| RBL2    | YARS    |
| FOS     | YBX1    |
| RB1     | YBX1    |
| RBL2    | YBX1    |
| EPAS1   | YEATS2  |
| FOS     | YIF1A   |
| EPAS1   | YPEL5   |
| E2F4    | YTHDF2  |
| ESR1    | YTHDF2  |
| RB1     | YTHDF2  |
| RBL2    | YTHDF2  |
| PPARD   | YWHAE   |
| HIF1A   | YWHAG   |
| SOX2    | YWHAZP2 |
| STAT1   | YY1AP1  |
| HIF1A   | ZBTB10  |
| E2F4    | ZBTB17  |
| ETS1    | ZBTB17  |
| GATA2   | ZBTB17  |
| MITF    | ZBTB17  |
| RB1     | ZBTB17  |
| RBL2    | ZBTB17  |
| SMARCA4 | ZBTB17  |
| TAL1    | ZBTB17  |
| FOS     | ZBTB20  |

|        |         |
|--------|---------|
| STAT6  | ZBTB25  |
| FOS    | ZBTB3   |
| FOS    | ZBTB32  |
| ESR1   | ZBTB40  |
| ESR2   | ZBTB40  |
| GATA3  | ZBTB40  |
| RB1    | ZBTB40  |
| RBL2   | ZBTB40  |
| STAT6  | ZBTB42  |
| ETS1   | ZBTB48  |
| HNF4A  | ZBTB48  |
| RBL2   | ZBTB48  |
| TAL1   | ZBTB48  |
| FOS    | ZBTB5   |
| E2F4   | ZBTB8A  |
| TAL1   | ZBTB8A  |
| TRIM28 | ZBTB8B  |
| E2F4   | ZBTB8OS |
| ESR1   | ZBTB8OS |
| GATA2  | ZBTB8OS |
| RB1    | ZBTB8OS |
| RBL2   | ZBTB8OS |
| TRIM28 | ZC3H11A |
| TP53   | ZC3H11B |
| RB1    | ZC3H12A |
| STAT6  | ZC3H12A |
| TRIM28 | ZC3H12A |
| E2F4   | ZC3H12A |
| ESR1   | ZC3H12A |
| EGR1   | ZC3H4   |
| STAT1  | ZC3H4   |



|        |          |
|--------|----------|
| STAT1  | ZC3HAV1  |
| TP53   | ZCCHC11  |
| STAT1  | ZCCHC14  |
| RB1    | ZCCHC17  |
| RBL2   | ZCCHC17  |
| RUNX1  | ZCCHC5   |
| EGR1   | ZCWPW1   |
| HIF1A  | ZDBF2    |
| SOX2   | ZDBF2    |
| SOX2   | ZDHHC11  |
| E2F4   | ZDHHC18  |
| TAL1   | ZDHHC18  |
| ZNF263 | ZDHHC19  |
| PRDM14 | ZEB1     |
| HIF1A  | ZFAT     |
| PRDM14 | ZFHX3    |
| TFAP2C | ZFHX3    |
| TRIM28 | ZFP69    |
| TRIM28 | ZFP69B   |
| FOS    | ZFYVE21  |
| STAT1  | ZFYVE28  |
| TRIM28 | ZFYVE9   |
| ZNF263 | ZIC3     |
| FOXA1  | ZKSCAN1  |
| STAT1  | ZKSCAN2  |
| STAT6  | ZKSCAN2  |
| ESR1   | ZMIZ1    |
| RB1    | ZMPSTE24 |
| RBL2   | ZMPSTE24 |
| E2F4   | ZMYM1    |
| RBL2   | ZMYM1    |

|        |          |
|--------|----------|
| TAL1   | ZMYM1    |
| E2F4   | ZMYM4    |
| TAL1   | ZMYM4    |
| TRIM28 | ZMYM6    |
| RBL2   | ZMYND12  |
| FOXA1  | ZMYND8   |
| STAT1  | ZMYND8   |
| TFAP2C | ZMYND8   |
| TRIM28 | ZNF124   |
| STAT1  | ZNF131   |
| ZNF263 | ZNF131   |
| HIF1A  | ZNF131   |
| FOS    | ZNF143   |
| HIF1A  | ZNF148   |
| STAT1  | ZNF181   |
| HIF1A  | ZNF2     |
| STAT6  | ZNF219   |
| STAT1  | ZNF229   |
| STAT1  | ZNF230   |
| ESR1   | ZNF248   |
| EGR1   | ZNF280B  |
| STAT1  | ZNF280D  |
| STAT6  | ZNF286A  |
| EPAS1  | ZNF292   |
| HIF1A  | ZNF292   |
| BACH1  | ZNF3     |
| STAT1  | ZNF302   |
| FOXA1  | ZNF317P1 |
| RUNX1  | ZNF318   |
| TRIM28 | ZNF326   |
| RB1    | ZNF362   |

|        |         |
|--------|---------|
| STAT6  | ZNF365  |
| STAT6  | ZNF384  |
| STAT1  | ZNF385D |
| HIF1A  | ZNF398  |
| STAT6  | ZNF403  |
| E2F4   | ZNF436  |
| ESR1   | ZNF436  |
| ESR2   | ZNF436  |
| PRDM14 | ZNF436  |
| RBL2   | ZNF436  |
| TRIM28 | ZNF436  |
| EGR1   | ZNF480  |
| ESR1   | ZNF488  |
| STAT1  | ZNF516  |
| PRDM14 | ZNF518B |
| PRDM14 | ZNF521  |
| FOS    | ZNF555  |
| EPAS1  | ZNF572  |
| FOS    | ZNF574  |
| E2F4   | ZNF593  |
| RUNX1  | ZNF595  |
| EGR1   | ZNF664  |
| FOXA1  | ZNF664  |
| IGF1R  | ZNF664  |
| PRDM14 | ZNF664  |
| TRIM28 | ZNF669  |
| TRIM28 | ZNF670  |
| TRIM28 | ZNF678  |
| TAL1   | ZNF683  |
| RBL2   | ZNF684  |
| TRIM28 | ZNF684  |

|        |         |
|--------|---------|
| FOS    | ZNF687  |
| TRIM28 | ZNF695  |
| STAT6  | ZNF710  |
| ZNF263 | ZNF726  |
| FOS    | ZNF77   |
| FOS    | ZNF775  |
| STAT1  | ZNF79   |
| TRIM28 | ZNF847P |
| TRIM28 | ZNF859P |
| HIF1A  | ZNHIT1  |
| TAL1   | ZNHIT6  |
| TRIM28 | ZNHIT6  |
| SOX2   | ZNRF3   |
| TRIM28 | ZP4     |
| FOXA1  | ZPLD1   |
| HIF1A  | ZRANB3  |
| TRIM28 | ZSCAN20 |
| FOS    | ZSWIM1  |
| EPAS1  | ZSWIM4  |
| FOS    | ZSWIM4  |
| ESR1   | ZSWIM5  |
| RB1    | ZSWIM5  |
| RBL2   | ZSWIM5  |
| STAT6  | ZW10    |
| ZNF263 | ZXDA    |
| RB1    | ZYG11B  |
| TAL1   | ZYG11B  |
| EGR1   | ZYX     |
| STAT6  | ZZZ3    |
